# Supplementary material for: Organophotocatalytic silyl transfer of silylboranes enabled by methanol association: a versatile strategy for C–Si bond construction
Source: Royal Society of Chemistry journal article supplement (doi:10.1039/d2gc03577d), 2022-12-08

## ***Supporting information***

# **Organophotocatalytic Silyl Transfer of Silylboranes Enabled by Methanol**

## **Association: A Versatile Strategy for C-Si Bond Construction**

*Yi Wan, <sup>a</sup> Yumo Zhao, <sup>a</sup> Jiajie Zhu, <sup>a</sup> Qiyang Yuan, <sup>a</sup> Wei Wang, <sup>b,\*</sup> and Yongqiang Zhang <sup>a,\*</sup>*

<sup>a</sup> Shanghai Frontiers Science Center of Optogenetic Techniques for Cell Metabolism, Shanghai Key Laboratory of New Drug Design, and School of Pharmacy, East China University of Science and Technology, Shanghai 200237, P. R. China

<sup>b</sup> Department of Pharmacology and Toxicology and BIO5 Institute, University of Arizona, Tucson, AZ 85721-0207, USA

Correspondence to: Professor Yongqiang Zhang (Email: yongqiangzhang@ecust.edu.cn) and Professor Wei Wang (Email: wwang@pharmacy.arizona.edu)

## **Table of Contents**

|                                                            |     |
|------------------------------------------------------------|-----|
| 1. Optimization of Reaction Conditions.....                | S2  |
| 2. Mechanistic Investigations.....                         | S4  |
| 3. Experiment Procedures and Product Characterization..... | S8  |
| 4. Spectral Data for Products.....                         | S30 |

## Optimization of Reaction Conditions

Table S1 Optimization of photocatalyst. <sup>a</sup>

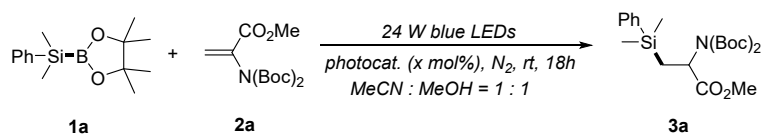

| Entry | Catalyst           | Yield <sup>b</sup> |
|-------|--------------------|--------------------|
| 1     | <b>P1</b> (3 mol%) | 82%                |
| 2     | <b>P2</b> (3 mol%) | n.d. <sup>c</sup>  |
| 3     | <b>P3</b> (1 mol%) | 70%                |
| 4     | <b>P4</b> (1 mol%) | 25%                |
| 5     | <b>P5</b> (1 mol%) | n.d. <sup>c</sup>  |
| 6     | <b>P6</b> (1 mol%) | n.d. <sup>c</sup>  |
| 7     | <b>P1</b> (1 mol%) | 55%                |
| 8     | <b>P1</b> (5 mol%) | 80%                |

<sup>a</sup> Reaction conditions: 24 W blue LEDs, **1a** (0.3 mmol, 1.5 equiv.), **2a** (0.2 mmol, 1.0 equiv.), MeCN : MeOH = 1 : 1 (4 mL), N<sub>2</sub>, rt, 18 h, unless otherwise noted.

<sup>b</sup> Yields were determined by <sup>1</sup>H NMR using 1,3,5-Trimethylbenzene as internal standard. <sup>c</sup> Not detected.

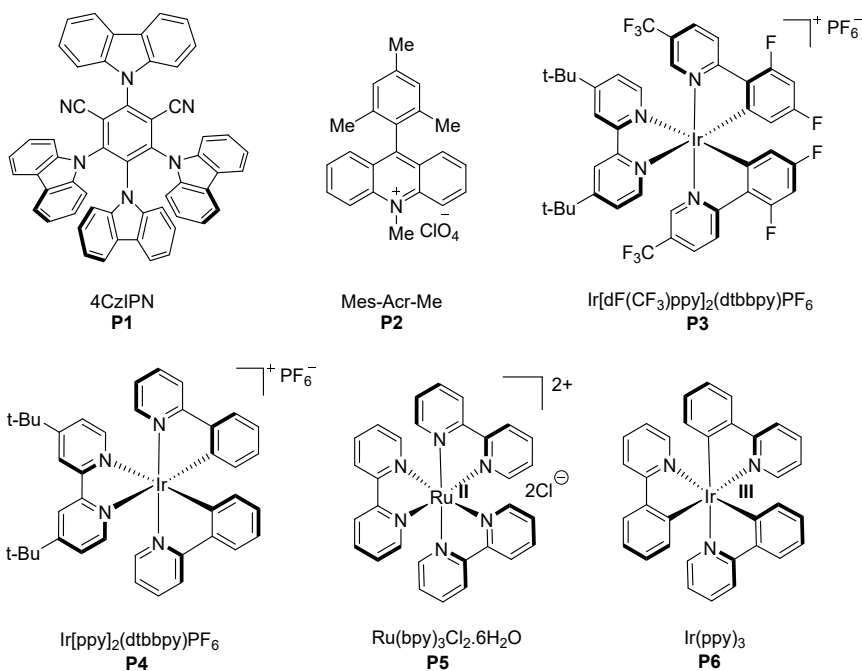

**Table S2** Optimization of reaction solvent and time. <sup>a</sup>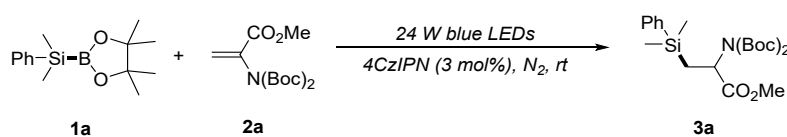

| Entry | Solvent                | Time | Yield <sup>b</sup> |
|-------|------------------------|------|--------------------|
| 1     | MeCN : MeOH = 1 : 1    | 18 h | 82%                |
| 2     | DCM : MeOH = 1 : 1     | 18 h | 35%                |
| 3     | Acetone : MeOH = 1 : 1 | 18 h | 80%                |
| 4     | DMF : MeOH = 1 : 1     | 18 h | 35%                |
| 5     | DMSO : MeOH = 1 : 1    | 18 h | 22%                |
| 6     | THF : MeOH = 1 : 1     | 18 h | 70%                |
| 7     | MeCN : MeOH = 1 : 1    | 24 h | 78%                |
| 8     | MeCN : MeOH = 1 : 1    | 12 h | 60%                |
| 9     | MeCN : MeOH = 1 : 1    | 18 h | 72% <sup>c</sup>   |
| 10    | MeCN : MeOH = 1 : 1    | 18 h | 82% <sup>d</sup>   |

<sup>a</sup> Reaction conditions: 24 W blue LEDs, **1a** (0.3 mmol, 1.5 equiv.), **2a** (0.2 mmol, 1.0 equiv.), 4CzIPN (0.006 mmol, 3 mol%), solvent (4 mL), N<sub>2</sub>, rt, unless otherwise noted. <sup>b</sup> Yields were determined by <sup>1</sup>H NMR using 1,3,5-Trimethylbenzene as internal standard. <sup>c</sup> 1.0 equiv. of **1a** was employed. <sup>d</sup> 2.0 equiv. of **1a** was employed.

**Table S3** Validation of reaction conditions for the synthesis of **19a**. <sup>a</sup>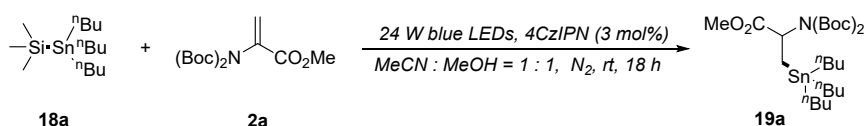

| Entry | Change From Optimal Conditions  | Yield <sup>b</sup> |
|-------|---------------------------------|--------------------|
| 1     | none                            | 78%                |
| 2     | in the absence of photocatalyst | n.d. <sup>c</sup>  |
| 3     | in darkness                     | n.d. <sup>c</sup>  |
| 4     | in the absence of MeOH          | 66%                |

<sup>a</sup> Reaction conditions: 24 W blue LEDs, **18a** (0.3 mmol, 1.5 equiv.), **2a** (0.2 mmol, 1.0 equiv.), 4CzIPN (0.006 mmol, 3 mol%), MeCN : MeOH = 1 : 1 (4 mL), N<sub>2</sub>, rt, 18 h, unless otherwise noted. <sup>b</sup> Isolated yields were reported. <sup>c</sup> Not detected.

**Table S4** Validation of reaction conditions for the synthesis of **21a**. <sup>a</sup>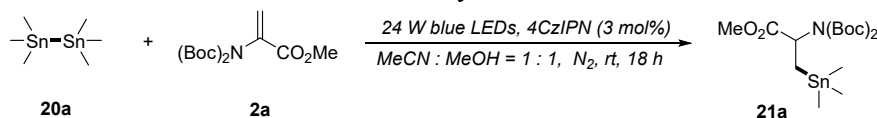

| Entry | Change From Optimal Conditions  | Yield <sup>b</sup> |
|-------|---------------------------------|--------------------|
| 1     | none                            | 80%                |
| 2     | in the absence of photocatalyst | n.d. <sup>c</sup>  |
| 3     | in darkness                     | n.d. <sup>c</sup>  |
| 4     | in the absence of MeOH          | 72%                |

<sup>a</sup> Reaction conditions: 24 W blue LEDs, **20a** (0.3 mmol, 1.5 equiv.), **2a** (0.2 mmol, 1.0 equiv.), 4CzIPN (0.006 mmol, 3 mol%), MeCN : MeOH = 1 : 1 (4 mL), N<sub>2</sub>, rt, 18 h, unless otherwise noted. <sup>b</sup> Isolated yields were reported. <sup>c</sup> Not detected.

**Table S5** Validation of reaction conditions for the synthesis of **23a**. <sup>a</sup>

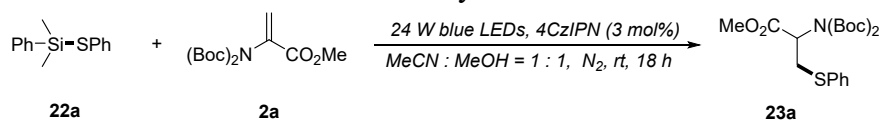

| Entry | Change From Optimal Conditions  | Yield <sup>b</sup> |
|-------|---------------------------------|--------------------|
| 1     | none                            | 80%                |
| 2     | in the absence of photocatalyst | n.d <sup>c</sup>   |
| 3     | in darkness                     | n.d <sup>c</sup>   |
| 4     | in the absence of MeOH          | 70%                |

<sup>a</sup> Reaction conditions: 24 W blue LEDs, **22a** (0.3 mmol, 1.5 equiv.), **2a** (0.2 mmol, 1.0 equiv.), 4CzIPN (0.006 mmol, 3 mol%), MeCN : MeOH = 1 : 1 (4 mL), N<sub>2</sub>, rt, 18 h, unless otherwise noted. <sup>b</sup> Isolated yields were reported. <sup>c</sup> Not detected.

## Mechanistic Investigations

**Figure S1** Study of association of methanol with PhMe<sub>2</sub>Si-BPin **1a** by NMR spectra

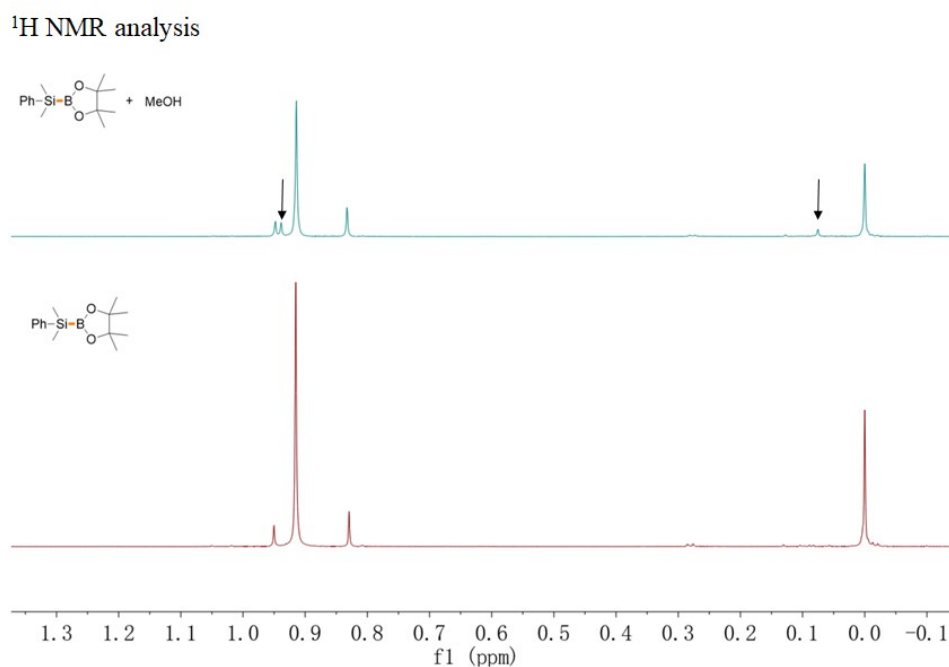

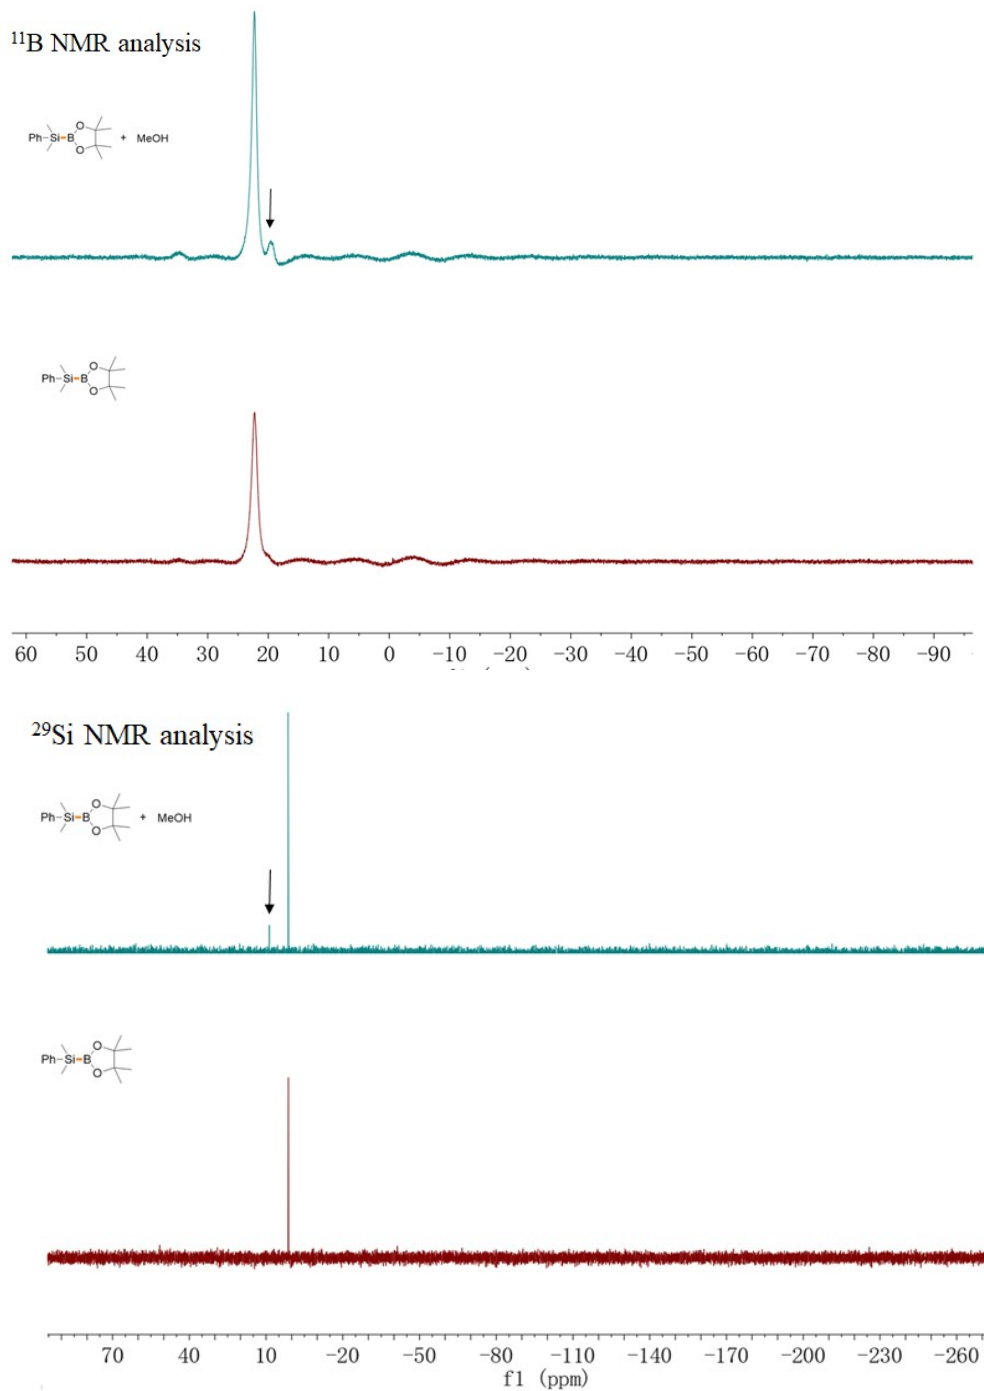

**Notes:** 1 equiv. of PhMe<sub>2</sub>Si-BPin **1a** and 5.0 equiv. of MeOH were dissolved into *d*<sup>6</sup>-DMSO. The NMR spectra data of this sample was then collected. According to the NMR data, it is reasonable to conclude that methanol could associate with PhMe<sub>2</sub>Si-BPin **1a**.

## Figure S2 Stern-Volmer fluorescence quenching experiments

Emission intensities were recorded using a FluoroMax-4 Spectrophotometer. All quenching data was recorded using a 1.00 cm quartz cuvette, PMT voltage 500 v, scan speed 1200 nm/min. In a typical experiment, the solution of photocatalyst (30  $\mu$ M) in anhydrous MeCN or a solvent mixture (anhydrous MeCN/MeOH = 1 : 1) was added the appropriate amount of quenchers. Then the emission spectrum of the sample was collected.

### A. Emission quenching by **2a** in anhydrous MeCN

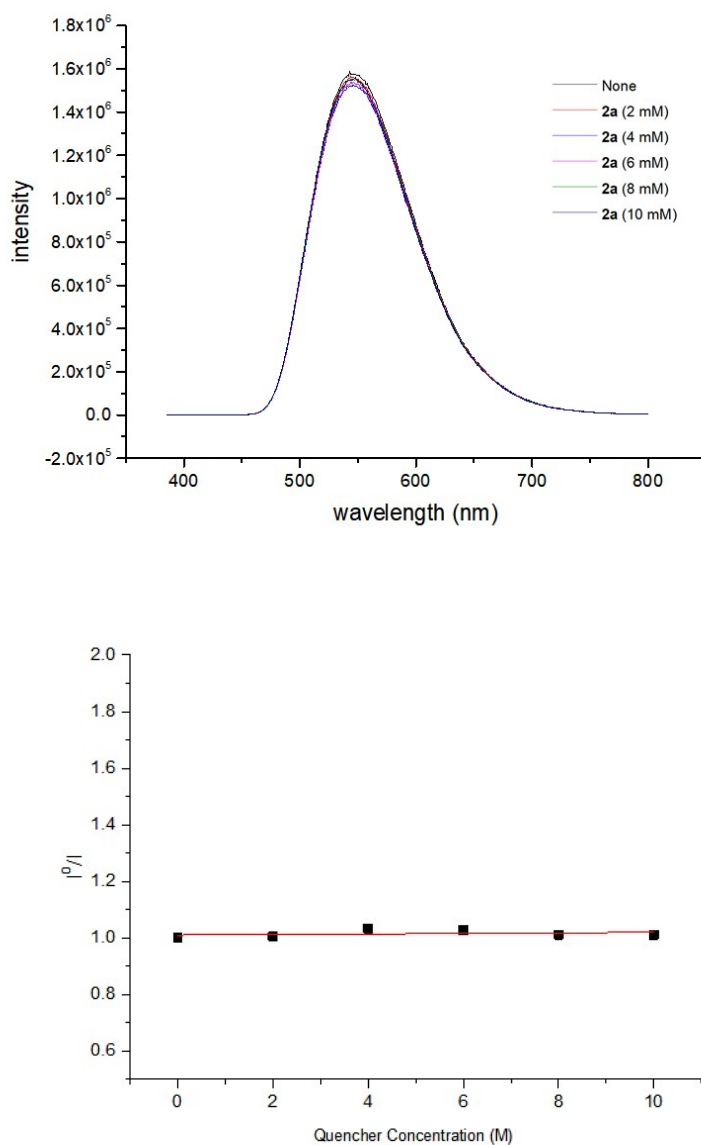

### B. Emission quenching by **1a** in a solvent mixture (anhydrous MeCN/MeOH = 1 : 1)

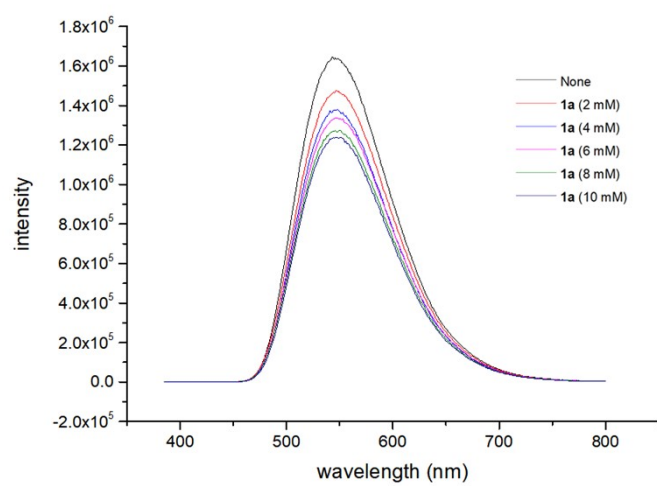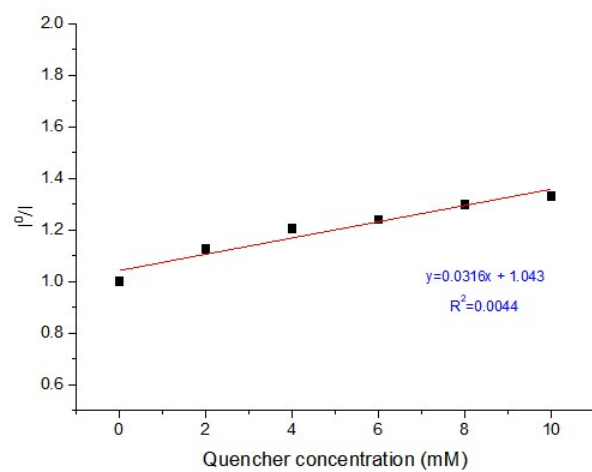

### C. Emission quenching by **1a** in anhydrous MeCN

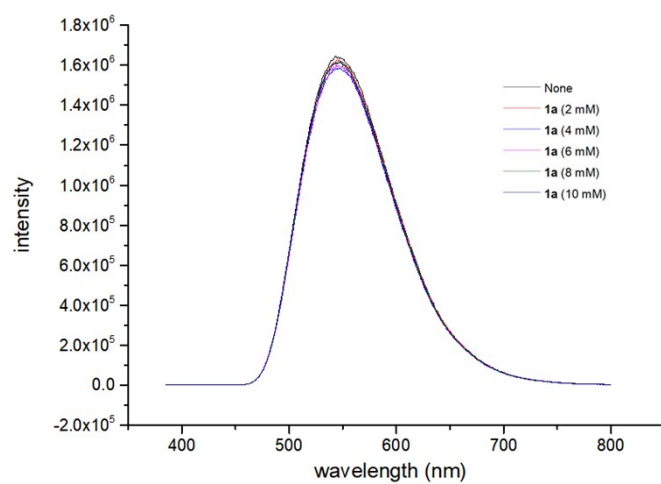

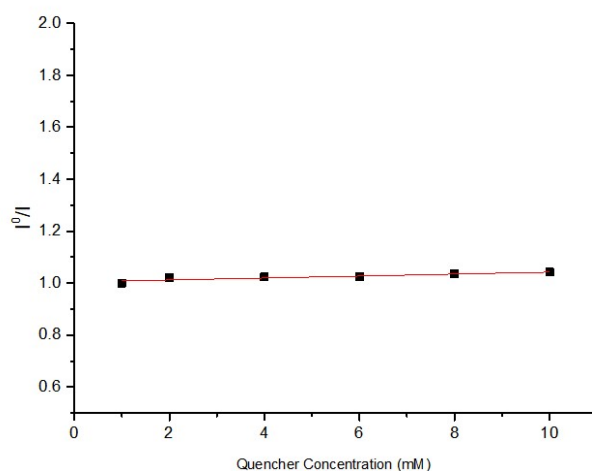

**Notes:** Both **1a** and **2a** could not quench the emission of 4CzIPN using anhydrous MeCN as solvent, while significant quenching effect of **1a** has been detected using anhydrous MeCN/MeOH (1 : 1) as solvent. Furthermore, the quenching by **2a** has not been detected even if using anhydrous MeCN/MeOH (1 : 1) as solvent (data not shown here). These results, as well as the results in Figure S1, reveal that methanol could associate with **1a** and the newly formed complex could quench the emission of 4CzIPN efficiently.

## Experiment Procedures and Product Characterization

### General Information

Unless stated otherwise, commercial reagents were used as received, reactions were conducted in oven-dried glassware under an atmosphere of nitrogen using anhydrous solvents. Thin-layer chromatography (TLC) was conducted with 0.25 mm silica gel plates (Qingdao Haiyang Chemical China), and the compounds were visualized exposure to UV light (254 nm) or by potassium permanganate staining. Flash chromatography was performed on silica gel 200–300 mesh (purchased from Qingdao Haiyang Chemical China) with commercial solvents (purchased from Adamas-beta®). Data for  $^1\text{H}$  NMR spectra (recorded on a Bruker AM 400 Spectrometer at 400Hz) are reported as follows: chemical shift ( $\delta$  ppm), multiplicity, coupling constant (Hz) and integration. Among these parameters, multiplicities were given as s (singlet), d (doublet), t (triplet), dd (double of doublet), and m (multiplets).  $^{13}\text{C}$  NMR and  $^{19}\text{F}$  NMR spectra were recorded on Bruker Spectrometers (at 100 or 151 MHz). Data for  $^{13}\text{C}$  NMR and  $^{19}\text{F}$  NMR spectra are reported in terms of chemical shift. Blue LEDs were purchased from <http://shenzhen0920428.11467.com/>. High-resolution mass spectrometry (HRMS) was recorded on Waters LCT Premier XE spectrometer.

### General Procedure A

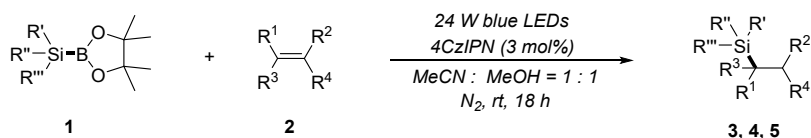

To a 25 mL Schlenk tube equipped with a magnetic stir bar was added the 4CzIPN (4.7 mg, 0.006 mmol). The Schlenk tube was sealed and degassed via vacuum evacuation and subsequent backfill with nitrogen for three times. After that CH<sub>3</sub>CN (2.0 mL), MeOH (2.0 mL), **2** (0.2 mmol) and **1** (0.3 mmol) were added sequentially by means of syringe. The resulting solution was degassed for 15 min by bubbling N<sub>2</sub> stream, then stirred at room temperature under the irradiation of 24 W blue LED for 18 hours. The solvent was removed on a rotary evaporator under reduced pressure and the crude product was purified by flash silica-gel column chromatography (petroleum ether/ethyl acetate = 50 : 1 – 5 : 1) to give the products **3**, **4**, **5**.

## General Procedure B

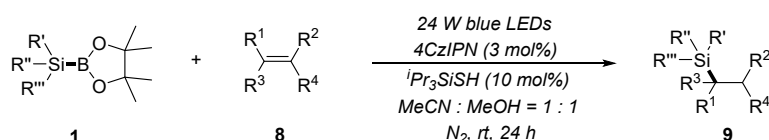

To a 25 mL Schlenk tube equipped with a magnetic stir bar was added the 4CzIPN (4.7 mg, 0.006 mmol). After that CH<sub>3</sub>CN (2.0 mL), MeOH (2.0 mL), **8** (0.2 mmol), **1** (0.3 mmol) and *i*Pr<sub>3</sub>SiSH (3.8 mg, 0.02 mmol) were added sequentially by means of syringe. The resulting solution was degassed for 15 min by bubbling N<sub>2</sub> stream. Then the reaction was placed under blue LEDs (24 W) for 24 hours. The solvent was removed on a rotary evaporator under reduced pressure and the crude product was purified by flash silica-gel column chromatography (petroleum ether/ethyl acetate = 50 : 1 – 5 : 1) to give the products **9**.

## General Procedure C

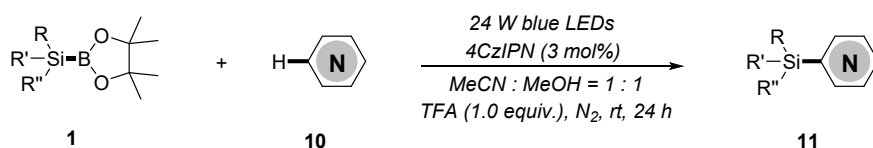

To a 25 mL Schlenk tube equipped with a magnetic stir bar was added the 4CzIPN (4.7 mg, 0.006 mmol). After that CH<sub>3</sub>CN (2.0 mL), MeOH (2.0 mL), **10** (0.2 mmol), **1** (0.3 mmol) and TFA (23 mg, 0.2 mmol) were added sequentially by means of syringe. The resulting solution was degassed for 15 min by bubbling N<sub>2</sub> stream, then stirred at room temperature under the irradiation of 24 W blue LED for 24 hours. The solvent was removed on a rotary evaporator under reduced pressure and the crude product was purified by flash silica-gel column chromatography (petroleum ether/ethyl acetate = 100 : 1 – 5 : 1) to give the products **11**.

## General Procedure D

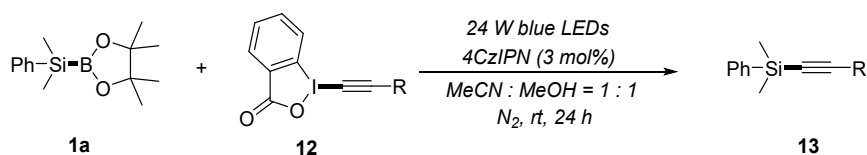

To a 25 mL Schlenk tube equipped with a magnetic stir bar was added the 4CzIPN (4.7 mg, 0.006 mmol). After that CH<sub>3</sub>CN (2.0 mL), MeOH (2.0 mL), **12** (0.2 mmol) and **1a** (0.3 mmol) were added sequentially by means of syringe. The resulting solution was degassed for 15 min by bubbling N<sub>2</sub> stream, then stirred at room temperature under the irradiation of 24 W blue LED for 24 hours. The solvent was removed on a rotary evaporator under reduced pressure and the crude product was purified by flash silica-gel column chromatography (petroleum ether/ethyl acetate = 100 : 1 – 10 : 1) to give the products **13**.

## Product Characterization

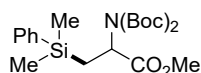

### Methyl 3-(dimethyl(phenyl)silyl)-2-methylpropanoate (**3a**)

According to the general procedure **A**, **2a** (60 mg, 0.2 mmol, 1.0 equiv.), **1a** (78 mg, 0.3 mmol, 1.5 equiv.), 4CzIPN (4.7 mg, 0.006 mmol, 3 mol%), CH<sub>3</sub>CN (2.0 mL), MeOH (2.0 mL) were used. Crude product was purified by flash column chromatography on silica gel (PE/EA = 20 : 1) and 70 mg of **3a** was obtained as a colorless oil in 80% yield. <sup>1</sup>H NMR (400 MHz, CDCl<sub>3</sub>) 7.52 – 7.48 (m, 2H), 7.35 – 7.33 (m, 3H), 5.00 (dd, *J* = 9.8, 5.7 Hz, 1H), 3.67 (s, 3H), 1.69 (dd, *J* = 15.4, 5.7 Hz, 1H), 1.54 (dd, *J* = 15.4, 9.8 Hz, 1H), 1.46 (s, 18H), 0.33 (s, 3H), 0.32 (s, 3H). <sup>13</sup>C NMR (100 MHz, CDCl<sub>3</sub>) δ 177.3, 152.0, 138.6, 133.5, 129.0, 127.8, 83.1, 55.5, 53.5, 28.0, 17.2, –2.6. HRMS (ESI-TOF) *m/z*: [M + Na]<sup>+</sup> Calcd for C<sub>22</sub>H<sub>35</sub>NO<sub>6</sub>SiNa 460.2131; Found 460.2134

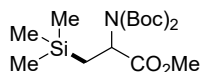

### Methyl 3-(dimethyl(phenyl)silyl)-2-methylpropanoate (**3b**)

According to the general procedure **A**, **2a** (60 mg, 0.2 mmol, 1.0 equiv.), **1b** (60 mg, 0.3 mmol, 1.5 equiv.), 4CzIPN (4.7 mg, 0.006 mmol, 3 mol%), CH<sub>3</sub>CN (2.0 mL), MeOH (2.0 mL) were used. Crude product was purified by flash column chromatography on silica gel (PE/EA = 20 : 1) and 54 mg of **3b** was obtained as a colorless oil in 72% yield. <sup>1</sup>H NMR (400 MHz, CDCl<sub>3</sub>) δ 4.92 (dd, *J* = 8.8, 4.5 Hz, 1H), 3.67 (s, 3H), 1.90 (dd, *J* = 14.6, 8.8 Hz, 1H), 1.48 (s, 18H), 1.00 (dd, *J* = 14.6, 4.4 Hz, 1H), 0.16 (s, 9H); <sup>13</sup>C NMR (100 MHz, CDCl<sub>3</sub>) δ 170.6, 151.0, 81.8, 56.8, 51.1, 26.9, 8.7, 0.0; HRMS (ESI-TOF) *m/z*: [M + Na]<sup>+</sup> Calcd for C<sub>17</sub>H<sub>33</sub>NO<sub>6</sub>SiNa 398.1975; Found 398.1971.

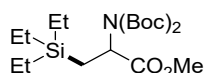

### Methyl 2-(bis(tert-butoxycarbonyl)amino)-3-(triethylsilyl)propanoate (**3c**)

According to the general procedure **A**, **2a** (60 mg, 0.2 mmol, 1.0 equiv.), **1c** (72 mg, 0.3 mmol, 1.5 equiv.), 4CzIPN (4.7 mg, 0.006 mmol, 3 mol%), CH<sub>3</sub>CN (2.0 mL), MeOH (2.0 mL) were used. Crude

product was purified by flash column chromatography on silica gel (PE/EA = 20 : 1) and 65 mg of **3c** was obtained as a colorless oil in 78% yield. <sup>1</sup>H NMR (400 MHz, CDCl<sub>3</sub>) δ 4.98 (dd, *J* = 9.6, 5.5 Hz, 1H), 3.70 (s, 3H), 1.50 (s, 18H), 1.47 – 1.43 (m, 1H), 1.29 – 1.22 (m, 1H), 0.93 (d, *J* = 7.9 Hz, 9H), 0.61 – 0.52 (m, 6H). <sup>13</sup>C NMR (100 MHz, CDCl<sub>3</sub>) δ 172.6, 152.1, 82.9, 55.5, 52.3, 28.0, 12.9, 7.3, 3.4. HRMS (ESI-TOF) *m/z*: [M + Na]<sup>+</sup> Calcd for C<sub>20</sub>H<sub>39</sub>NO<sub>6</sub>SiNa 440.2444; Found 440.2438.

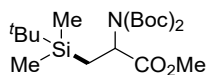

#### Methyl 2-(bis(tert-butoxycarbonyl)amino)-3-(cyclohexyldimethylsilyl)propanoate (**3d**)

According to the general procedure **A**, **2a** (60 mg, 0.2 mmol, 1.0 equiv.), **1d** (72 mg, 0.3 mmol, 1.5 equiv.), 4CzIPN (4.7 mg, 0.006 mmol, 3 mol%), CH<sub>3</sub>CN (2.0 mL), MeOH (2.0 mL) were used. Crude product was purified by flash column chromatography on silica gel (PE/EA = 20 : 1) and 63 mg of **3d** was obtained as a colorless oil in 76% yield. <sup>1</sup>H NMR (400 MHz, CDCl<sub>3</sub>) δ 5.02 (dd, *J* = 9.8, 5.7 Hz, 1H), 3.74 (s, 3H), 1.54 (s, 18H), 1.51 – 1.46 (m, 1H), 1.33 – 1.27 (m, 1H), 0.91 (s, 9H), 0.07 (s, 3H), 0.00 (s, 3H). <sup>13</sup>C NMR (100 MHz, CDCl<sub>3</sub>) δ 172.7, 152.0, 82.9, 55.6, 52.3, 28.0, 26.3, 16.5, 13.4, – 6.0, –6.2. HRMS (ESI-TOF) *m/z*: [M + Na]<sup>+</sup> Calcd for C<sub>20</sub>H<sub>39</sub>NO<sub>6</sub>SiNa 440.2444; Found 440.2437.

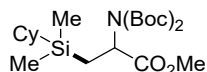

#### Methyl 2-(bis(tert-butoxycarbonyl)amino)-3-(cyclohexyldimethylsilyl)propanoate (**3e**)

According to the general procedure **A**, **2a** (60 mg, 0.2 mmol, 1.0 equiv.), **1e** (80 mg, 0.3 mmol, 1.5 equiv.), 4CzIPN (4.7 mg, 0.006 mmol, 3 mol%), CH<sub>3</sub>CN (2.0 mL), MeOH (2.0 mL) were used. Crude product was purified by flash column chromatography on silica gel (PE/EA = 20 : 1) and 58 mg of **3e** was obtained as a colorless oil in 66% yield. <sup>1</sup>H NMR (400 MHz, CDCl<sub>3</sub>) δ 5.02 (dd, *J* = 10.1, 5.4 Hz, 1H), 1.81 – 1.69 (m, 5H), 1.55 (s, 18H), 1.48 – 1.07 (m, 9H), 0.03 (s, 3H), 0.00 (s, 3H); <sup>13</sup>C NMR (100 MHz, CDCl<sub>3</sub>) δ 172.7, 152.1, 82.9, 55.6, 53.4, 28.0, 27.3, 26.9, 25.2, 14.9, –5.0; HRMS (ESI-TOF) *m/z*: [M + Na]<sup>+</sup> Calcd for C<sub>22</sub>H<sub>41</sub>NO<sub>6</sub>SiNa 466.2601; Found 466.2605.

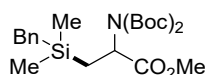

#### Methyl 3-(benzyldimethylsilyl)-2-(bis(tert-butoxycarbonyl)amino)propanoate (**3f**)

According to the general procedure **A**, **2a** (60 mg, 0.2 mmol, 1.0 equiv.), **1f** (83 mg, 0.3 mmol, 1.5 equiv.), 4CzIPN (4.7 mg, 0.006 mmol, 3 mol%), CH<sub>3</sub>CN (2.0 mL), MeOH (2.0 mL) were used. Crude product was purified by flash column chromatography on silica gel (PE/EA = 20 : 1) and 56 mg of **3f** was obtained as a colorless oil in 62% yield. <sup>1</sup>H NMR (400 MHz, CDCl<sub>3</sub>) δ 7.23 – 7.19 (m, 2H), 7.12 – 6.98 (m, 3H), 5.04 (dd, *J* = 8.8, 5.9 Hz, 1H), 3.72 (s, 3H), 2.15 (s, 2H), 1.50 (s, 18H), 1.47 – 1.43 (m, 1H), 1.33 – 1.29 (m, 1H), 0.04 (s, 3H), 0.00 (s, 3H). <sup>13</sup>C NMR (100 MHz, CDCl<sub>3</sub>) δ 172.5, 152.0, 139.9, 128.2, 128.1, 124.0, 83.1, 55.5, 52.3, 28.0, 25.7, 16.6, –3.2. HRMS (ESI-TOF) *m/z*: [M + Na]<sup>+</sup> Calcd for C<sub>23</sub>H<sub>37</sub>NO<sub>6</sub>SiNa 474.2288; Found 474.2285.

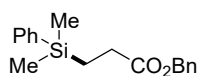

#### Benzyl 3-(dimethyl(phenyl)silyl)propanoate (**4a**)

According to the general procedure **A**, **2a1** (32 mg, 0.2 mmol, 1.0 equiv.), **1a** (78 mg, 0.3 mmol, 1.5

equiv.), 4CzIPN (4.7 mg, 0.006 mmol, 3 mol%), CH<sub>3</sub>CN (2.0 mL), MeOH (2.0 mL) were used. Crude product was purified by flash column chromatography on silica gel (PE/EA = 20 : 1) and 50 mg of **3a2** was obtained as a colorless oil in 84% yield. <sup>1</sup>H NMR (400 MHz, CDCl<sub>3</sub>) δ 7.50 – 7.46 (m, 2H), 7.37 – 7.31 (m, 8H), 5.06 (s, 2H), 2.35 – 2.30 (m, 2H), 1.13 – 1.09 (m, 2H), 0.28 (s, 6H); <sup>13</sup>C NMR (400 MHz, CDCl<sub>3</sub>) δ 174.7, 138.1, 136.0, 133.6, 129.1, 128.5, 128.2, 127.9, 66.3, 28.9, 10.8, –3.3; HRMS (ESI–TOF) m/z: [M + Na]<sup>+</sup> Calcd for C<sub>18</sub>H<sub>22</sub>O<sub>2</sub>SiNa 321.1287; Found 321.1282.

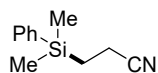

### 3-(Dimethyl(phenyl)silyl)propanenitrile (4b)

According to the general procedure A, **2b** (11 mg, 0.2 mmol, 1.0 equiv.), **1a** (78 mg, 0.3 mmol, 1.5 equiv.), 4CzIPN (4.7 mg, 0.006 mmol, 3 mol%), CH<sub>3</sub>CN (2.0 mL), MeOH (2.0 mL) were used. Crude product was purified by flash column chromatography on silica gel (PE/EA = 50 : 1) and 23 mg of **3b** was obtained as a colorless oil in 60% yield. <sup>1</sup>H NMR (400 MHz, CDCl<sub>3</sub>) δ 7.50 – 7.46 (m, 2H), 7.40 – 7.38 (m, 3H), 2.28 – 2.24 (m, 2H), 1.17– 1.13 (m, 2H), 0.36 (s, 6H); <sup>13</sup>C NMR (100 MHz, CDCl<sub>3</sub>) δ 135.7, 132.6, 127.3, 120.3, 11.3, 11.1, –4.4; HRMS (ESI–TOF) m/z: [M + Na]<sup>+</sup> Calcd for C<sub>11</sub>H<sub>15</sub>NSiNa 212.0871; Found 212.0866.

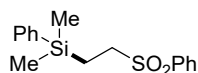

### Dimethyl(phenyl)(2-(phenylsulfonyl)ethyl)silane (4c)

According to the general procedure A, **2c** (33 mg, 0.2 mmol, 1.0 equiv.), **1a** (78 mg, 0.3 mmol, 1.5 equiv.), 4CzIPN (4.7 mg, 0.006 mmol, 3 mol%), CH<sub>3</sub>CN (2.0 mL), MeOH (2.0 mL) were used. Crude product was purified by flash column chromatography on silica gel (PE/EA = 10 : 1) and 44 mg of **4c** was obtained as a colorless oil in 72% yield. <sup>1</sup>H NMR (400 MHz, CDCl<sub>3</sub>) δ 7.79 – 7.77 (m, 2H), 7.54 – 7.56 (m, 1H), 7.48 – 7.44 (m, 2H), 7.32 – 7.24 (m, 5H), 2.91 – 2.86 (m, 2H), 1.11 – 1.06 (m, 2H), 0.20 (s, 6H); <sup>13</sup>C NMR (100 MHz, CDCl<sub>3</sub>) δ 138.7, 136.6, 133.7, 133.5, 129.7, 129.3, 128.3, 128.2, 120.4, 115.5, 77.2, 52.6, 8.6, –3.3; HRMS (ESI–TOF) m/z: [M + Na]<sup>+</sup> Calcd for C<sub>16</sub>H<sub>20</sub>O<sub>2</sub>SSiNa 327.0851; Found 327.0855.

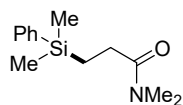

### 3-(dimethyl(phenyl)silyl)-N,N-dimethylpropanamide (4d)

According to the general procedure A, **2d** (20 mg, 0.2 mmol, 1.0 equiv.), **1a** (78 mg, 0.3 mmol, 1.5 equiv.), 4CzIPN (4.7 mg, 0.006 mmol, 3 mol%), CH<sub>3</sub>CN (2.0 mL), MeOH (2.0 mL) were used. Crude product was purified by flash column chromatography on silica gel (PE/EA = 10 : 1) and 35 mg of **4d** was obtained as a colorless oil in 74% yield. <sup>1</sup>H NMR (400 MHz, CDCl<sub>3</sub>) δ 7.54 – 7.50 (m, 2H), 7.32 – 7.28 (m, 3H), 2.91 (s, 3H), 2.90 (s, 3H), 2.28 – 2.23 (m, 2H), 1.11 – 1.07 (m, 2H), 0.30 (s, 6H); <sup>13</sup>C NMR (100 MHz, CDCl<sub>3</sub>) δ 169.4, 133.8, 128.8, 124.3, 48.7, 32.4, 30.8, 23.0, 6.1, –7.9; HRMS (ESI–TOF) m/z: [M + Na]<sup>+</sup> Calcd for C<sub>13</sub>H<sub>21</sub>NOSiNa 258.1290; Found 258.1286.

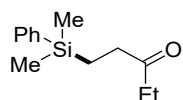

### 1-(Dimethyl(phenyl)silyl)pentan-3-one (4e)

According to the general procedure A, **2e** (16 mg, 0.2 mmol, 1.0 equiv.), **1a** (78 mg, 0.3 mmol, 1.5 equiv.), 4CzIPN (4.7 mg, 0.006 mmol, 3 mol%), CH<sub>3</sub>CN (2.0 mL), MeOH (2.0 mL) were used. Crude product was purified by flash column chromatography on silica gel (PE/EA = 20 : 1) and 32 mg of **4e** was obtained as a colorless oil in 72% yield. <sup>1</sup>H NMR (400 MHz, CDCl<sub>3</sub>) δ 7.54 – 7.44 (m, 2H), 7.36 – 7.34 (m, 3H), 2.40 – 2.32 (m, 4H), 1.04 – 0.96 (m, 5H), 0.28 (s, 6H); <sup>13</sup>C NMR (400 MHz, CDCl<sub>3</sub>) δ 212.4, 138.4, 133.6, 133.0, 129.3, 127.9, 36.7, 35.2, 9.3, 8.0, –3.2; HRMS (ESI–TOF) m/z: [M + Na]<sup>+</sup> Calcd for C<sub>13</sub>H<sub>20</sub>OSiNa 243.1181; Found 243.1176.

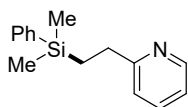

### 2-(2-(Dimethyl(phenyl)silyl)ethyl)pyridine (4f)

According to the general procedure A, **2f** (21 mg, 0.2 mmol, 1.0 equiv.), **1a** (78 mg, 0.3 mmol, 1.5 equiv.), 4CzIPN (4.7 mg, 0.006 mmol, 3 mol%), CH<sub>3</sub>CN (2.0 mL), MeOH (2.0 mL) were used. Crude product was purified by flash column chromatography on silica gel (PE/EA = 10 : 1) and 35 mg of **4f** was obtained as a colorless oil in 72% yield. <sup>1</sup>H NMR (400 MHz, CDCl<sub>3</sub>) δ 8.62 – 8.42 (m, 1H), 7.57 – 7.51 (m, 3H), 7.41 – 7.30 (m, 3H), 7.13 – 7.10 (m, 1H), 7.07 – 7.05 (m, 1H), 2.87 – 2.74 (m, 2H), 1.25 – 1.15 (m, 2H), 0.31 (s, 6H); <sup>13</sup>C NMR (100 MHz, CDCl<sub>3</sub>) δ 164.1, 149.0, 138.8, 136.3, 133.6, 128.9, 122.0, 120.8, 32.5, 29.7, –3.2; HRMS (ESI–TOF) m/z: [M + Na]<sup>+</sup> Calcd for C<sub>15</sub>H<sub>19</sub>NSiNa 264.1184; Found 264.1182.

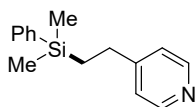

### 4-(2-(Dimethyl(phenyl)silyl)ethyl)pyridine (4g)

According to the general procedure A, **2g** (21 mg, 0.2 mmol, 1.0 equiv.), **1a** (78 mg, 0.3 mmol, 1.5 equiv.), 4CzIPN (4.7 mg, 0.006 mmol, 3 mol%), CH<sub>3</sub>CN (2.0 mL), MeOH (2.0 mL) were used. Crude product was purified by flash column chromatography on silica gel (PE/EA = 10 : 1) and 37 mg of **4g** was obtained as a colorless oil in 76% yield. <sup>1</sup>H NMR (400 MHz, CDCl<sub>3</sub>) δ 8.48 – 8.44 (m, 2H), 7.54 – 7.50 (m, 2H), 7.39 – 7.35 (m, 3H), 7.12 – 7.07 (m, 2H), 2.62 – 2.58 (m, 2H), 1.13 – 1.08 (m, 2H), 0.31 (s, 6H); <sup>13</sup>C NMR (100 MHz, CDCl<sub>3</sub>) δ 149.6, 133.6, 132.3, 130.6, 129.8, 129.2, 124.7, 123.4, 29.7, 16.6, –3.2; HRMS (ESI–TOF) m/z: [M + Na]<sup>+</sup> Calcd for C<sub>15</sub>H<sub>19</sub>NSiNa 264.1184; Found 264.1182.

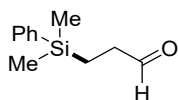

### 3-(Dimethyl(phenyl)silyl)propanal (4h)

According to the general procedure A, **2h** (11 mg, 0.2 mmol, 1.0 equiv.), **1a** (78 mg, 0.3 mmol, 1.5 equiv.), 4CzIPN (4.7 mg, 0.006 mmol, 3 mol%), CH<sub>3</sub>CN (2.0 mL), MeOH (2.0 mL) were used. Crude product was purified by flash column chromatography on silica gel (PE/EA = 20 : 1) and 27 mg of **4h** was obtained as a colorless oil in 70% yield. <sup>1</sup>H NMR (400 MHz, CDCl<sub>3</sub>) δ 9.72–9.70 (m, 1H), 7.52 – 7.48 (m, 2H), 7.37 – 7.33 (m, 3H), 2.40 – 2.35 (m, 2H), 1.03 – 0.99 (m, 2H), 0.30 (s, 6H); <sup>13</sup>C NMR

(400 MHz, CDCl<sub>3</sub>)  $\delta$  168.0, 133.2, 131.5, 129.2, 127.9, 126.6, 125.2, 125.0, 25.9, 25.6, 16.2, -7.3; HRMS (ESI-TOF)  $m/z$ : [M + Na]<sup>+</sup> Calcd for C<sub>11</sub>H<sub>16</sub>OSiNa 215.0868; Found 215.0874.

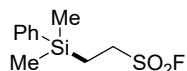

#### 2-(Dimethyl(phenyl)silyl)ethane-1-sulfonyl fluoride (4i)

According to the general procedure A, **2i** (22 mg, 0.2 mmol, 1.0 equiv.), **1a** (78 mg, 0.3 mmol, 1.5 equiv.), 4CzIPN (4.7 mg, 0.006 mmol, 3 mol%), CH<sub>3</sub>CN (2.0 mL), MeOH (2.0 mL) were used. Crude product was purified by flash column chromatography on silica gel (PE/EA = 20 : 1) and 37 mg of **4i** was obtained as a colorless oil in 76% yield. <sup>1</sup>H NMR (400 MHz, CDCl<sub>3</sub>)  $\delta$  7.50 – 7.46 (m, 2H), 7.42 – 7.38 (m, 3H), 3.25 – 3.16 (m, 2H), 1.42 – 1.36 (m, 2H), 0.38 (s, 6H); <sup>13</sup>C NMR (400 MHz, CDCl<sub>3</sub>)  $\delta$  135.5, 133.4, 130.0, 128.4, 47.8, 29.7, 10.0, -3.6; HRMS (ESI-TOF)  $m/z$ : [M + Na]<sup>+</sup> Calcd for C<sub>10</sub>H<sub>15</sub>FO<sub>2</sub>SSiNa 269.0444; Found 269.0440.

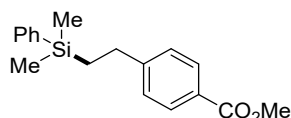

#### methyl 4-(2-(dimethyl(phenyl)silyl)ethyl)benzoate (4j)

According to the general procedure A, **2j** (32 mg, 0.2 mmol, 1.0 equiv.), **1a** (78 mg, 0.3 mmol, 1.5 equiv.), 4CzIPN (4.7 mg, 0.006 mmol, 3 mol%), CH<sub>3</sub>CN (2.0 mL), MeOH (2.0 mL) were used. Crude product was purified by flash column chromatography on silica gel (PE/EA = 20 : 1) and 49 mg of **4j** was obtained as a colorless oil in 82% yield. <sup>1</sup>H NMR (400 MHz, CDCl<sub>3</sub>)  $\delta$  7.93 – 7.90 (m, 2H), 7.72 – 7.67 (m, 2H), 7.55 – 7.47 (m, 3H), 7.38 – 7.35 (m, 2H), 3.89 (s, 3H), 2.69 – 2.65 (m, 2H), 1.14 – 1.10 (m, 2H), 0.30 (s, 6H); <sup>13</sup>C NMR (400 MHz, CDCl<sub>3</sub>)  $\delta$  167.1, 149.6, 139.5, 133.6, 129.2, 128.7, 128.2, 127.6, 51.9, 32.0, 15.1, -2.1; HRMS (ESI-TOF)  $m/z$ : [M + Na]<sup>+</sup> Calcd for C<sub>18</sub>H<sub>22</sub>O<sub>2</sub>SiNa 321.1287; Found 321.1290.

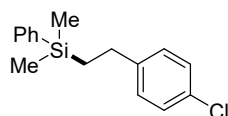

#### (4-Chlorophenethyl)dimethyl(phenyl)silane (4k)

According to the general procedure A, **2k** (28 mg, 0.2 mmol, 1.0 equiv.), **1a** (78 mg, 0.3 mmol, 1.5 equiv.), 4CzIPN (4.7 mg, 0.006 mmol, 3 mol%), CH<sub>3</sub>CN (2.0 mL), MeOH (2.0 mL) were used. Crude product was purified by flash column chromatography on silica gel (PE/EA = 50 : 1) and 36 mg of **4k** was obtained as a colorless oil in 65% yield. <sup>1</sup>H NMR (400 MHz, CDCl<sub>3</sub>)  $\delta$  7.52 – 7.50 (m, 2H), 7.39 – 7.35 (m, 3H), 7.22 – 7.18 (m, 2H), 7.10 – 7.08 (m, 2H), 2.67 – 2.53 (m, 2H), 1.14 – 1.04 (m, 2H), 0.29 (s, 6H); <sup>13</sup>C NMR (100 MHz, CDCl<sub>3</sub>)  $\delta$  144.3, 138.2, 134.2, 131.1, 129.1, 129.0, 128.3, 127.8, 29.7, 17.7, -3.1; HRMS (ESI-TOF)  $m/z$ : [M + Na]<sup>+</sup> Calcd for C<sub>16</sub>H<sub>19</sub>ClSiNa 297.0842; Found 297.0844.

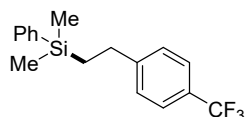

#### Dimethyl(phenyl)(4-(trifluoromethyl)phenethyl)silane (4l)

According to the general procedure A, **2l** (34 mg, 0.2 mmol, 1.0 equiv.), **1a** (78 mg, 0.3 mmol, 1.5 equiv.), 4CzIPN (4.7 mg, 0.006 mmol, 3 mol%), CH<sub>3</sub>CN (2.0 mL), MeOH (2.0 mL) were used. Crude product was purified by flash column chromatography on silica gel (PE/EA = 50 : 1) and 48 mg of **4l** was obtained as a colorless oil in 78% yield. <sup>1</sup>H NMR (400 MHz, CDCl<sub>3</sub>) δ 7.55 – 7.48 (m, 4H), 7.38 – 7.36 (m, 3H), 7.28 – 7.24 (m, 2H), 2.70 – 2.64 (m, 2H), 1.14 – 1.08 (m, 2H), 0.30 (s, 6H); <sup>13</sup>C NMR (100 MHz, CDCl<sub>3</sub>) δ 149.3, 138.9, 133.8, 129.3 (q, <sup>2</sup>J<sub>CF</sub> = 31.6 Hz), 128.3 (q, <sup>3</sup>J<sub>CF</sub> = 4.1 Hz), 125.5 (q, <sup>1</sup>J<sub>CF</sub> = 270.0 Hz), 30.2, 17.9, -2.9; HRMS (ESI-TOF) m/z: [M + Na]<sup>+</sup> Calcd for C<sub>17</sub>H<sub>19</sub>F<sub>3</sub>SiNa 331.1106; Found 331.1102.

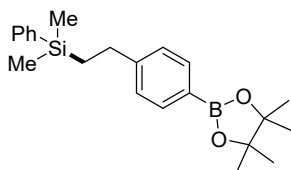

#### Dimethyl(phenyl)(4-(4,4,5,5-tetramethyl-1,3,2-dioxaborolan-2-yl)phenethyl)silane (4m)

According to the general procedure A, **2m** (46 mg, 0.2 mmol, 1.0 equiv.), **1a** (78 mg, 0.3 mmol, 1.5 equiv.), 4CzIPN (4.7 mg, 0.006 mmol, 3 mol%), CH<sub>3</sub>CN (2.0 mL), MeOH (2.0 mL) were used. Crude product was purified by flash column chromatography on silica gel (PE/EA = 50 : 1) and 54 mg of **4m** was obtained as a colorless oil in 74% yield. <sup>1</sup>H NMR (400 MHz, CDCl<sub>3</sub>) δ 7.64 (d, *J* = 7.8 Hz, 2H), 7.46 – 7.42 (m, 2H), 7.30 – 7.26 (m, 3H), 7.11 (d, *J* = 7.8 Hz, 2H), 2.58 – 2.54 (m, 2H), 1.26 (s, 12H), 1.06 – 1.02 (m, 2H), 0.21 (s, 6H); <sup>13</sup>C NMR (100 MHz, CDCl<sub>3</sub>) δ 146.5, 141.9, 137.3, 136.7, 134.3, 132.3, 132.1, 131.4, 131.0, 86.6, 32.5, 28.1, 20.8, 0.0; HRMS (ESI-TOF) m/z: [M + Na]<sup>+</sup> Calcd for C<sub>22</sub>H<sub>31</sub>BO<sub>2</sub>SiNa 389.2084; Found 389.2090.

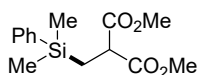

#### Dimethyl 2-((dimethyl(phenyl)silyl)methyl)malonate (4n)

According to the general procedure A, **2n** (29 mg, 0.2 mmol, 1.0 equiv.), **1a** (78 mg, 0.3 mmol, 1.5 equiv.), 4CzIPN (4.7 mg, 0.006 mmol, 3 mol%), CH<sub>3</sub>CN (2.0 mL), MeOH (2.0 mL) were used. Crude product was purified by flash column chromatography on silica gel (PE/EA = 20 : 1) and 48 mg of **4n** was obtained as a colorless oil in 85% yield. <sup>1</sup>H NMR (400 MHz, CDCl<sub>3</sub>) δ 7.52 – 7.47 (m, 2H), 7.37 – 7.33 (m, 3H), 3.60 (s, 6H), 3.36 (t, *J* = 7.8 Hz, 1H), 1.43 (d, *J* = 7.8 Hz, 2H), 0.30 (s, 6H); <sup>13</sup>C NMR (100 MHz, CDCl<sub>3</sub>) δ 170.1, 136.8, 133.0, 128.6, 127.2, 51.8, 46.8, 14.8, -3.7; HRMS (ESI-TOF) m/z: [M + Na]<sup>+</sup> Calcd for C<sub>14</sub>H<sub>20</sub>O<sub>4</sub>SiNa 303.1029; Found 303.1025.

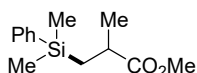

#### Methyl 3-(dimethyl(phenyl)silyl)-2-methylpropanoate (4o)

According to the general procedure A, **2o** (20 mg, 0.2 mmol, 1.0 equiv.), **1a** (78 mg, 0.3 mmol, 1.5 equiv.), 4CzIPN (4.7 mg, 0.006 mmol, 3 mol%), CH<sub>3</sub>CN (2.0 mL), MeOH (2.0 mL) were used. Crude product was purified by flash column chromatography on silica gel (PE/EA = 20 : 1) and 37 mg of **4o** was obtained as a colorless oil in 78% yield. <sup>1</sup>H NMR (400 MHz, CDCl<sub>3</sub>) δ 7.52 – 7.48 (m, 2H), 7.37 – 7.33 (m, 3H), 3.54 (s, 3H), 2.56 – 2.51 (m, 2H), 1.14 (d, *J* = 9.8 Hz, 1H), 0.96 – 0.90 (m, 2H), 0.29

(s, 6H);  $^{13}\text{C}$  NMR (100 MHz,  $\text{CDCl}_3$ )  $\delta$  177.9, 138.6, 133.5, 129.0, 127.8, 51.5, 35.5, 29.7, 20.9, 20.7, -2.6; HRMS (ESI-TOF)  $m/z$ :  $[\text{M} + \text{Na}]^+$  Calcd for  $\text{C}_{13}\text{H}_{20}\text{O}_2\text{SiNa}$  259.1130; Found 259.1135.

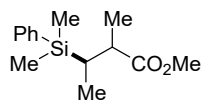

#### Methyl-3-(dimethyl(phenyl)silyl)-2-methylbutanoate (4p)

According to the general procedure A, **2p** (23 mg, 0.2 mmol, 1.0 equiv.), **1a** (78 mg, 0.3 mmol, 1.5 equiv.), 4CzIPN (4.7 mg, 0.006 mmol, 3 mol%),  $\text{CH}_3\text{CN}$  (2.0 mL), MeOH (2.0 mL) were used. Crude product was purified by flash column chromatography on silica gel (PE/EA = 20 : 1) and 36 mg of **4p** was obtained as a colorless oil in 72% yield.  $^1\text{H}$  NMR (400 MHz,  $\text{CDCl}_3$ )  $\delta$  7.53 – 7.49 (m, 2H), 7.37 – 7.33 (m, 3H), 3.58 (s, 3H), 2.54 – 2.50 (m, 1H), 1.29 – 1.25 (m, 1H), 1.10 (d,  $J$  = 7.0 Hz, 3H), 0.97 (d,  $J$  = 7.6 Hz, 3H), 0.31 (s, 3H), 0.30 (s, 3H);  $^{13}\text{C}$  NMR (100 MHz,  $\text{CDCl}_3$ )  $\delta$  176.9, 138.7, 133.9, 128.9, 127.7, 51.6, 41.9, 24.3, 17.2, 12.9, -3.7; HRMS (ESI-TOF)  $m/z$ :  $[\text{M} + \text{Na}]^+$  Calcd for  $\text{C}_{14}\text{H}_{22}\text{O}_2\text{SiNa}$  273.1287; Found 273.1288.

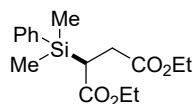

#### Diethyl 2-(dimethyl(phenyl)silyl)succinate (4q)

According to the general procedure A, **2q** (34 mg, 0.2 mmol, 1.0 equiv.), **1a** (78 mg, 0.3 mmol, 1.5 equiv.), 4CzIPN (4.7 mg, 0.006 mmol, 3 mol%),  $\text{CH}_3\text{CN}$  (2.0 mL), MeOH (2.0 mL) were used. Crude product was purified by flash column chromatography on silica gel (PE/EA = 20 : 1) and 49 mg of **4q** was obtained as a colorless oil in 80% yield.  $^1\text{H}$  NMR (400 MHz,  $\text{CDCl}_3$ )  $\delta$  7.51 – 7.48 (m, 2H), 7.39 – 7.34 (m, 3H), 4.09 – 4.03 (m, 4H), 2.84 – 2.66 (m, 2H), 2.24 (dd,  $J$  = 16.8, 2.9 Hz, 1H), 1.21 – 1.15 (m, 6H), 0.41 (s, 3H), 0.39 (s, 3H);  $^{13}\text{C}$  NMR (100 MHz,  $\text{CDCl}_3$ )  $\delta$  169.5, 168.1, 130.6, 129.1, 125.0, 123.2, 55.9, 55.4, 28.0, 26.9, 24.4, 9.5, -8.5, -9.6; HRMS (ESI-TOF)  $m/z$ :  $[\text{M} + \text{Na}]^+$  Calcd for  $\text{C}_{16}\text{H}_{24}\text{O}_4\text{SiNa}$  331.1342; Found 331.1346.

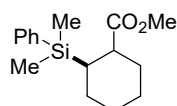

#### Methyl 2-(dimethyl(phenyl)silyl)cyclohexane-1-carboxylate (4r)

According to the general procedure A, **2r** (28 mg, 0.2 mmol, 1.0 equiv.), **1a** (78 mg, 0.3 mmol, 1.5 equiv.), 4CzIPN (4.7 mg, 0.006 mmol, 3 mol%),  $\text{CH}_3\text{CN}$  (2.0 mL), MeOH (2.0 mL) were used. Crude product was purified by flash column chromatography on silica gel (PE/EA = 20 : 1) and 41 mg of **4r** was obtained as a colorless oil in 75% yield.  $^1\text{H}$  NMR (400 MHz,  $\text{CDCl}_3$ )  $\delta$  7.52 – 7.48 (m, 2H), 7.35 – 7.32 (m, 3H), 3.52 (s, 3H), 2.68 – 2.66 (m, 1H), 1.98 – 1.95 (m, 1H), 1.76 – 1.68 (m, 2H), 1.60 – 1.48 (m, 4H), 1.16 – 1.10 (m, 2H), 0.29 (s, 6H);  $^{13}\text{C}$  NMR (100 MHz,  $\text{CDCl}_3$ )  $\delta$  175.7, 139.3, 133.9, 128.7, 127.6, 51.7, 41.1, 30.0, 28.1, 27.3, 24.0, 22.9, -3.7, -3.8; HRMS (ESI-TOF)  $m/z$ :  $[\text{M} + \text{Na}]^+$  Calcd for  $\text{C}_{16}\text{H}_{24}\text{O}_2\text{SiNa}$  299.1443; Found 299.1438.

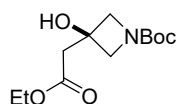

### **Tert-Butyl-3-(dimethyl(phenyl)silyl)-3-(2-methoxy-2-oxoethyl)azetidine-1-carboxylate (4s')**

According to general procedure A, **2s** (48 mg, 0.2 mmol, 1.0 equiv.), **1a** (78 mg, 0.3 mmol, 1.5 equiv.), 4CzIPN (4.7 mg, 0.006 mmol, 3 mol%), CH<sub>3</sub>CN (2.0 mL), MeOH (2.0 mL) were used. Crude product was purified by flash column chromatography on silica gel (PE/EA = 10 : 1) and 23 mg of **4s** was obtained as a colorless oil in 30% yield.

A vial containing **4s** (23 mg, 0.06 mmol) was filled with N<sub>2</sub>. CH<sub>2</sub>Cl<sub>2</sub> (1.0 mL) and HBF<sub>4</sub>·Et<sub>2</sub>O (0.2 mL, 0.09 mmol) were sequentially added at 0 °C. After 2 h stirring at 0 °C, the mixture was quenched with water. The aqueous layer was extracted with hexane (three times). The combined organic layer was washed with water and brine, and then was dried and concentrated to provide the fluorinated product without other purification.

The fluorinated compound was placed in a screw-top test tube. THF (0.5 mL), MeOH (1.0 mL), KF (7.0 mg, 0.12 mmol), KHCO<sub>3</sub> (30.0 mg, 0.3 mmol), 30% H<sub>2</sub>O<sub>2</sub> aq. (0.6 mmol) were sequentially added at 25 °C. After being stirred for 24 h, the mixture was quenched with Na<sub>2</sub>S<sub>2</sub>O<sub>3</sub> aq. The aqueous layer was extracted with ethyl acetate (three times). The combined organic layer was washed with water and brine, and then was dried and concentrated. Crude product was purified by flash column chromatography on silica gel (PE/EA = 2 : 1) and 10 mg of **4s'** was obtained as a colorless oil in 65% yield. <sup>1</sup>H NMR (400 MHz, CDCl<sub>3</sub>) δ 4.20 (q, *J* = 7.2, 2H), 3.93 (d, *J* = 9.4 Hz, 2H), 3.82 (d, *J* = 9.4 Hz, 2H), 2.81 (s, 2H), 1.44 (s, 9H), 1.29 (t, *J* = 7.2 Hz, 3H); <sup>13</sup>C NMR (100 MHz, CDCl<sub>3</sub>) δ 172.0, 156.4, 82.9, 79.8, 67.7, 61.3, 42.6, 28.3, 14.1. HRMS (EI) *m/z*: [M]<sup>+</sup> Calcd for C<sub>12</sub>H<sub>21</sub>NO<sub>5</sub> 259.1420; Found 259.1415.

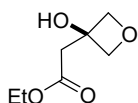

### **Methyl 2-(3-(dimethyl(phenyl)silyl)oxetan-3-yl)acetate (4t')**

According to general procedure A, **4t** (28 mg, 0.2 mmol, 1.0 equiv.), **1a** (78 mg, 0.3 mmol, 1.5 equiv.), 4CzIPN (4.7 mg, 0.006 mmol, 3 mol%), CH<sub>3</sub>CN (2.0 mL), MeOH (2.0 mL) were used. Crude product was purified by flash column chromatography on silica gel (PE/EA = 10 : 1) and 20 mg of **4t** was obtained as a colorless oil in 36% yield.

A vial containing **4t** (20 mg, 0.072 mmol) was filled with N<sub>2</sub>. CH<sub>2</sub>Cl<sub>2</sub> (1.0 mL) and HBF<sub>4</sub>·Et<sub>2</sub>O (0.25 mL, 0.12 mmol) were sequentially added at 0 °C. After 2 h stirring at 0 °C, the mixture was quenched with water. The aqueous layer was extracted with hexane (three times). The combined organic layer was washed with water and brine, and then was dried and concentrated to provide the fluorinated product without other purification.

The fluorinated compound was placed in a screw-top test tube. THF (0.5 mL), MeOH (1.0 mL), KF (8.7 mg, 0.15 mmol), KHCO<sub>3</sub> (40 mg, 0.4 mmol), 30% H<sub>2</sub>O<sub>2</sub> aq. (0.8 mmol) were sequentially added at 25 °C. After being stirred for 24 h, the mixture was quenched with Na<sub>2</sub>S<sub>2</sub>O<sub>3</sub> aq. The aqueous layer was extracted with ethyl acetate (three times). The combined organic layer was washed with water and brine, and then was dried and concentrated. Crude product was purified by flash column chromatography on silica gel (PE/EA = 2 : 1) and 8 mg of **4s'** was obtained as a colorless oil in 70% yield. <sup>1</sup>H NMR (400 MHz, CDCl<sub>3</sub>) δ 4.68 (d, *J* = 6.9 Hz, 2H), 4.49 (d, *J* = 6.9 Hz, 2H), 4.20 (q, *J* = 7.1 Hz, 2H), 3.96 (s, 1H), 2.93 (s, 2H), 1.29 (t, *J* = 7.1 Hz, 3H); <sup>13</sup>C NMR (100 MHz, CDCl<sub>3</sub>) δ 171.1, 82.1, 71.0, 60.4, 41.1, 13.3. HRMS (EI) *m/z*: [M]<sup>+</sup> Calcd for C<sub>7</sub>H<sub>12</sub>O<sub>4</sub> 160.0736; Found 160.0740.

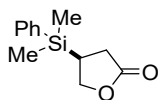

#### 4-(Dimethyl(phenyl)silyl)dihydrofuran-2(3H)-one (4v)

According to the general procedure A, **2v** (17 mg, 0.2 mmol, 1.0 equiv.), **1a** (78 mg, 0.3 mmol, 1.5 equiv.), 4CzIPN (4.7 mg, 0.006 mmol, 3 mol%), CH<sub>3</sub>CN (2.0 mL), MeOH (2.0 mL) were used. Crude product was purified by flash column chromatography on silica gel (PE/EA = 20 : 1) and 18 mg of **4v** was obtained as a colorless oil in 42% yield. <sup>1</sup>H NMR (400 MHz, CDCl<sub>3</sub>) δ 7.50 – 7.46 (m, 2H), 7.44 – 7.36 (m, 3H), 4.45 – 4.40 (m, 1H), 4.14 – 4.08 (m, 1H), 2.54 – 2.46 (m, 1H), 2.33 – 2.27 (m, 1H), 2.09 – 2.01 (m, 1H), 0.37 (s, 6H); <sup>13</sup>C NMR (100 MHz, CDCl<sub>3</sub>) δ 178.1, 135.1, 133.7, 129.1, 128.4, 115.3, 70.9, 30.4, 23.9, -4.8; HRMS (ESI-TOF) m/z: [M + Na]<sup>+</sup> Calcd for C<sub>12</sub>H<sub>16</sub>O<sub>2</sub>SiNa 243.0817; Found 243.0812.

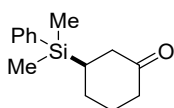

#### 3-(Dimethyl(phenyl)silyl)cyclohexan-1-one (4w)

According to the general procedure A, **2w** (19 mg, 0.2 mmol, 1.0 equiv.), **1a** (78 mg, 0.3 mmol, 1.5 equiv.), 4CzIPN (4.7 mg, 0.006 mmol, 3 mol%), CH<sub>3</sub>CN (2.0 mL), MeOH (2.0 mL) were used. Crude product was purified by flash column chromatography on silica gel (PE/EA = 20 : 1) and 27 mg of **4w** was obtained as a colorless oil in 58% yield. <sup>1</sup>H NMR (400 MHz, CDCl<sub>3</sub>) δ 7.50 – 7.46 (m, 2H), 7.38 – 7.34 (m, 3H), 2.38 – 2.06 (m, 5H), 1.83 – 1.79 (m, 1H), 1.72 – 1.66 (m, 1H), 1.48 – 1.38 (m, 2H), 1.32 – 1.24 (m, 2H), 0.31 (s, 6H); <sup>13</sup>C NMR (100 MHz, CDCl<sub>3</sub>) δ 212.8, 136.6, 133.9, 129.3, 127.9, 53.5, 42.4, 41.9, 29.8, 27.7, 26.1, -5.3, -5.4; HRMS (ESI-TOF) m/z: [M + Na]<sup>+</sup> Calcd for C<sub>14</sub>H<sub>20</sub>OSiNa 255.1181; Found 255.1185.

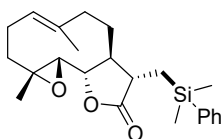

#### (3S,3aS,9aR,10aS,10bS,E)-3-((dimethyl(phenyl)silyl)methyl)-6,9a-dimethyl-3a,4,5,8,9,9a,10a,10b-octahydrooxireno[2',3':9,10]cyclodeca[1,2-b]furan-2(3H)-one (5a)

According to the general procedure A, **Parthenolide** (50 mg, 0.2 mmol, 1.0 equiv.), **1a** (78 mg, 0.3 mmol, 1.5 equiv.), 4CzIPN (4.7 mg, 0.006 mmol, 3 mol%), CH<sub>3</sub>CN (2.0 mL), MeOH (2.0 mL) were used. Crude product was purified by flash column chromatography on silica gel (PE/EA = 5 : 1) and 65 mg of **5a** was obtained as a colorless oil in 84% yield. <sup>1</sup>H NMR (400 MHz, CDCl<sub>3</sub>) δ 7.57 – 7.54 (m, 2H), 7.38 – 7.34 (m, 3H), 5.02 – 4.96 (m, 1H), 3.69 (t, *J* = 9.1 Hz, 1H), 3.48 (s, 3H), 2.54 (d, *J* = 8.9 Hz, 1H), 2.34 – 2.28 (m, 2H), 2.16 – 2.02 (m, 3H), 1.84 – 1.76 (m, 1H), 1.72 – 1.66 (m, 1H), 1.62 (s, 3H), 1.58 – 1.54 (m, 1H), 1.48 – 1.42 (m, 1H), 1.23 (s, 3H), 1.20 – 1.10 (m, 3H), 0.41 (s, 3H), 0.39 (s, 3H); <sup>13</sup>C NMR (100 MHz, CDCl<sub>3</sub>) δ 179.7, 136.7, 136.0, 131.5, 130.3, 127.2, 84.3, 68.6, 63.7, 54.1, 46.6, 42.9, 38.9, 31.9, 26.3, 19.4, 19.1, 17.3, 0.4, 0.0; HRMS (ESI-TOF) m/z: [M + Na]<sup>+</sup> Calcd for C<sub>23</sub>H<sub>32</sub>O<sub>3</sub>SiNa 407.2018; Found 407.2021.

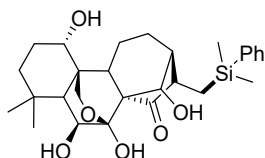

**(1S,5S,6R,6aS,8S,9S)-8-((Dimethyl(phenyl)silyl)methyl)-1,5,6-trihydroxy-4,4-dimethyl-14-(13-oxidaneylidene)-2,3,4,4a,5,6,8,9,10,11,11a,11b-dodecahydro-11b15-6,11b-(epoxymethano)-6a,9-methanocyclohepta[c]naphthalen-7(1H)-one (5b)**

According to the general procedure A, **Oridonin** (73 mg, 0.2 mmol, 1.0 equiv.), **1a** (78 mg, 0.3 mmol, 1.5 equiv.), 4CzIPN (4.7 mg, 0.006 mmol, 3 mol%), CH<sub>3</sub>CN (2.0 mL), MeOH (2.0 mL) were used. Crude product was purified by flash column chromatography on silica gel (DCM/MeOH = 50 : 1) and 70 mg of **5b** was obtained as a colorless oil in 70% yield. <sup>1</sup>H NMR (400 MHz, CDCl<sub>3</sub>) δ 7.54 – 7.46 (m, 2H), 7.38 – 7.32 (m, 3H), 6.24 (d, *J*=11.4Hz, 1H), 5.64 (s, 1H), 4.89 (s, 1H), 4.44 (s, 1H), 4.21 (d, *J*=7.1Hz, 1H), 4.12 (dd, *J*=10.8, 5.6 Hz, 1H), 4.02 (d, *J*=10.8Hz, 1H), 3.65 (dd, *J*=11.4, 6.5 Hz, 1H), 3.43 (dd, *J*=11.2, 5.7 Hz, 1H), 3.04 – 2.99 (m, 1H), 1.94 (s, 1H), 1.98 – 1.92 (m, 1H), 1.70 – 1.52 (m, 4H), 1.52 – 1.34 (m, 4H), 1.28 – 1.18 (m, 4H), 1.10 – 1.05 (m, 6H), 0.78 (dd, *J* = 15.1, 11.1 Hz, 1H), 0.32 (s, 6H); <sup>13</sup>C NMR (100 MHz, DMSO-d<sub>6</sub>) δ 227.2, 140.4, 135.5, 131.2, 130.0, 98.7, 95.2, 75.2, 75.1, 73.6, 64.9, 62.6, 62.4, 54.9, 48.8, 41.2, 40.5, 40.1, 35.5, 34.6, 31.4, 23.5, 21.6, 20.5, 13.4, -0.6; HRMS (ESI-TOF) *m/z*: [M + Na]<sup>+</sup> Calcd for C<sub>28</sub>H<sub>40</sub>O<sub>6</sub>SiNa 523.2492; Found 523.2486.

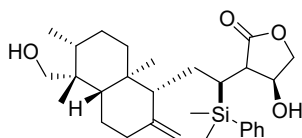

**(4S)-3-((S)-1-(Dimethyl(phenyl)silyl)-2-((1R,4aS,5R,6R,8aS)-5-(hydroxymethyl)-5,6,8a-trimethyl-2-methylenedecahydronaphthalen-1-yl)ethyl)-4-hydroxydihydrofuran-2(3H)-one (5c)**

According to the general procedure A, **Andrographolide** (70 mg, 0.2 mmol, 1.0 equiv.), **1a** (78 mg, 0.3 mmol, 1.5 equiv.), 4CzIPN (4.7 mg, 0.006 mmol, 3 mol%), CH<sub>3</sub>CN (2.0 mL), MeOH (2.0 mL) were used. Crude product was purified by flash column chromatography on silica gel (PE/EA = 2 : 1) and 53 mg of **5c** was obtained as a colorless oil in 55% yield. <sup>1</sup>H NMR (400 MHz, CDCl<sub>3</sub>) δ 7.52 – 7.48 (m, 2H), 7.40 – 7.32 (m, 3H), 6.73 (s, 1H), 4.76 – 4.72 (m, 3H), 4.31 (s, 1H), 4.09 (d, *J*=11.1Hz, 1H), 4.36 – 4.32 (m, 2H), 4.31 (s, 1H), 2.89 (s, 1H), 2.70 (s, 1H), 2.36 – 2.30 (m, 1H), 2.26 – 2.20 (m, 1H), 2.04 (s, 1H), 1.90 – 1.82 (m, 1H), 1.74 – 1.66 (m, 6H), 1.74 – 1.66 (m, 6H), 1.26 – 1.22 (m, 9H), 1.16 (s, 3H), 0.94 – 0.82 (m, 2H), 0.50 (s, 2H), 0.32 (s, 3H), 0.28 (s, 3H); <sup>13</sup>C NMR (100 MHz, CDCl<sub>3</sub>) δ 169.7, 143.0, 142.9, 136.1, 133.0, 132.3, 129.4, 124.7, 123.1, 102.7, 75.9, 65.5, 59.4, 50.9, 50.4, 48.7, 38.0, 34.6, 33.1, 31.6, 23.5, 20.5, 20.1, 19.1, 17.9, 10.2, -10.4; HRMS (ESI-TOF) *m/z*: [M + Na]<sup>+</sup> Calcd for C<sub>29</sub>H<sub>44</sub>O<sub>4</sub>SiNa 507.2907; Found 507.2901.

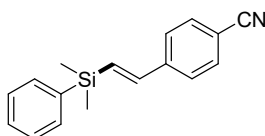

**(E)-4-(2-(Dimethyl(phenyl)silyl)vinyl)benzonitrile (7a)**

According to the general procedure A, **6a** (51 mg, 0.4 mmol, 2.0 equiv.), **1a** (52 mg, 0.2 mmol, 1.0

equiv.), 4CzIPN (4.7 mg, 0.006 mmol, 3 mol%), CH<sub>3</sub>CN (2.0 mL), MeOH (2.0 mL) were used. Crude product was purified by flash column chromatography on silica gel (PE/EA = 20 : 1) and 39 mg of **7a** was obtained as a colorless oil in 75% yield. <sup>1</sup>H NMR (400 MHz, CDCl<sub>3</sub>) δ 7.60 (d, *J* = 8.5 Hz, 2H), 7.56 – 7.52 (m, 2H), 7.50 (d, *J* = 8.5 Hz, 3H), 7.40 – 7.37 (m, 3H), 6.91 (d, *J* = 19.1 Hz, 1H), 6.74 (d, *J* = 19.1 Hz, 1H), 0.45 (s, 6H); <sup>13</sup>C NMR (100 MHz, CDCl<sub>3</sub>) δ 144.3, 143.4, 135.0, 133.7, 133.5, 131.0, 130.4, 129.1, 128.1, 120.0, 112.3, -1.7; HRMS (ESI-TOF) *m/z*: [M + Na]<sup>+</sup> Calcd for C<sub>17</sub>H<sub>18</sub>NSi 264.1209; Found 264.1208.

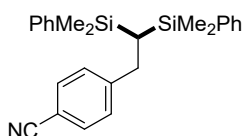

#### 4-(2,2-Bis(dimethyl(phenyl)silyl)ethyl)benzonitrile (**7a'**)

According to the general procedure A, **6a** (26mg, 0.2 mmol, 1.0 equiv.), **1a** (156 mg, 0.6 mmol, 3.0 equiv.), 4CzIPN (4.7 mg, 0.006 mmol, 3 mol%), CH<sub>3</sub>CN (2.0 mL), MeOH (2.0 mL) were used. Crude product was purified by flash column chromatography on silica gel (PE/EA = 20 : 1) and 48 mg of **7a'** was obtained as a colorless oil in 60% yield. <sup>1</sup>H NMR (400 MHz, CDCl<sub>3</sub>) δ 7.21 – 7.17 (m, 4H), 7.15 – 7.12 (m, 2H), 7.11 – 7.06 (m, 6H), 6.62 (d, *J* = 8.1 Hz, 2H), 2.58 (d, *J* = 6.6 Hz, 2H), 0.58 (t, *J* = 6.6 Hz, 1H), 0.05 (s, 6H), 0.00 (s, 6H); <sup>13</sup>C NMR (100 MHz, CDCl<sub>3</sub>) δ 150.7, 140.4, 134.7, 132.6, 130.0, 129.9, 128.8, 120.2, 110.0, 33.2, 16.3, 0.0, -1.4; HRMS (ESI-TOF) *m/z*: [M + Na]<sup>+</sup> Calcd for C<sub>25</sub>H<sub>29</sub>NSi<sub>2</sub>Na 422.1736; Found 422.1732.

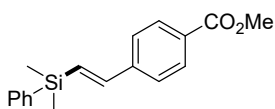

#### Methyl (E)-4-(2-(dimethyl(phenyl)silyl)vinyl)benzoate (**7b**)

According to the general procedure A, **6b** (64 mg, 0.4 mmol, 2.0 equiv.), **1a** (52 mg, 0.2 mmol, 1.0 equiv.), 4CzIPN (4.7 mg, 0.006 mmol, 3 mol%), CH<sub>3</sub>CN (2.0 mL), MeOH (2.0 mL) were used. Crude product was purified by flash column chromatography on silica gel (PE/EA = 20 : 1) and 47 mg of **7b** was obtained as a colorless oil in 80% yield. <sup>1</sup>H NMR (400 MHz, CDCl<sub>3</sub>) δ 7.99 (d, *J* = 8.1 Hz, 2H), 7.65 – 7.54 (m, 2H), 7.48 (d, *J* = 8.1 Hz, 2H), 7.37 (dd, *J* = 4.9, 1.9 Hz, 3H), 6.95 (d, *J* = 19.1 Hz, 1H), 6.72 (d, *J* = 19.1 Hz, 1H), 3.90 (s, 3H), 0.45 (s, 6H); <sup>13</sup>C NMR (100 MHz, CDCl<sub>3</sub>) δ 169.4, 146.6, 144.8, 140.5, 136.4, 133.4, 132.4, 131.9, 131.7, 130.4, 128.9, 54.6, 0.2; HRMS (ESI-TOF) *m/z*: [M + Na]<sup>+</sup> Calcd for C<sub>18</sub>H<sub>20</sub>O<sub>2</sub>SiNa 319.1130; Found 319.1136.

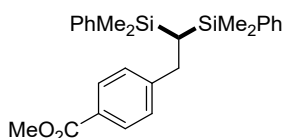

#### Methyl 4-(2,2-bis(dimethyl(phenyl)silyl)ethyl)benzoate (**7b'**)

According to the general procedure A, **7b** (32mg, 0.2 mmol, 1.0 equiv.), **1a** (156 mg, 0.6 mmol, 3.0 equiv.), 4CzIPN (4.7 mg, 0.006 mmol, 3 mol%), CH<sub>3</sub>CN (2.0 mL), MeOH (2.0 mL) were used. Crude product was purified by flash column chromatography on silica gel (PE/EA = 20 : 1) and 57 mg of **7b'** was obtained as a colorless oil in 66% yield. <sup>1</sup>H NMR (400 MHz, CDCl<sub>3</sub>) δ 7.57 (d, *J* = 8.2 Hz, 2H),

7.28 – 7.21 (m, 4H), 7.18 – 7.08 (m, 6H), 6.74 (d,  $J$  = 8.2 Hz, 2H), 3.72 (s, 3H), 2.65 (d,  $J$  = 6.6 Hz, 2H), 0.66 (t,  $J$  = 6.6 Hz, 1H), 0.00 (s, 6H), -0.01 (s, 6H);  $^{13}\text{C}$  NMR (100 MHz,  $\text{CDCl}_3$ )  $\delta$  168.5, 151.0, 140.9, 135.0, 130.6, 130.1, 129.6, 129.0, 53.2, 33.3, 16.4, 0.0, -0.8; HRMS (ESI-TOF)  $m/z$ :  $[\text{M} + \text{Na}]^+$  Calcd for  $\text{C}_{26}\text{H}_{32}\text{O}_2\text{Si}_2\text{Na}$  455.1839; Found 455.1841.

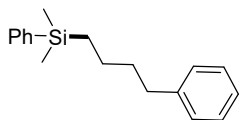

#### Dimethyl(phenyl)(4-phenylbutyl)silane (9a)

According to the general procedure **B**, **8a** (26 mg, 0.2 mmol, 1.0 equiv.), **1a** (78 mg, 0.3 mmol, 1.5 equiv.), 4CzIPN (4.7 mg, 0.006 mmol, 3 mol%),  $^i\text{Pr}_3\text{SiSH}$  (3.8 mg, 0.02 mmol, 10 mol%),  $\text{CH}_3\text{CN}$  (2.0 mL), MeOH (2.0 mL) were used. Crude product was purified by flash column chromatography on silica gel (PE/EA = 100 : 1) and 33 mg of **9a** was obtained as a colorless oil in 62% yield.  $^1\text{H}$  NMR (400 MHz,  $\text{CDCl}_3$ )  $\delta$  7.52 – 7.48 (m, 2H), 7.37 – 7.33 (m, 3H), 7.28 – 7.24 (m, 2H), 7.18 – 7.12 (m, 3H), 2.60 – 2.56 (m, 2H), 1.67 – 1.60 (m, 2H), 1.42 – 1.36 (m, 2H), 0.80 – 0.75 (m, 2H), 0.25 (s, 6H);  $^{13}\text{C}$  NMR (100 MHz,  $\text{CDCl}_3$ )  $\delta$  141.8, 138.2, 132.5, 127.8, 127.4, 127.2, 126.7, 124.5, 34.6, 34.3, 30.2, 28.7, 22.6, 14.5, -4.1. HRMS (EI)  $m/z$ :  $[\text{M}]^+$  Calcd for  $\text{C}_{18}\text{H}_{24}\text{Si}$  268.1647; Found 268.1640.

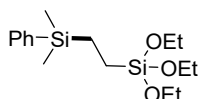

#### Dimethyl(phenyl)(4-phenylbutyl)silane (9b)

According to the general procedure **B**, **8b** (38 mg, 0.2 mmol, 1.0 equiv.), **1a** (78 mg, 0.3 mmol, 1.5 equiv.), 4CzIPN (4.7 mg, 0.006 mmol, 3 mol%),  $^i\text{Pr}_3\text{SiSH}$  (3.8 mg, 0.02 mmol, 10 mol%),  $\text{CH}_3\text{CN}$  (2.0 mL), MeOH (2.0 mL) were used. Crude product was purified by flash column chromatography on silica gel (PE/EA = 20 : 1) and 52 mg of **9b** was obtained as a colorless oil in 80% yield.  $^1\text{H}$  NMR (400 MHz,  $\text{CDCl}_3$ )  $\delta$  7.52 – 7.48 (m, 2H), 7.35 – 7.33 (m, 3H), 3.80 (q,  $J$  = 7.0 Hz, 6H), 1.21 (t,  $J$  = 7.0 Hz, 9H), 0.80 – 0.75 (m, 2H), 0.57 – 0.54 (m, 2H), 0.26 (s, 6H);  $^{13}\text{C}$  NMR (100 MHz,  $\text{CDCl}_3$ )  $\delta$  134.8, 132.7, 129.3, 127.7, 47.1, 29.0, 9.3, -4.3. HRMS (EI)  $m/z$ :  $[\text{M}]^+$  Calcd for  $\text{C}_{16}\text{H}_{30}\text{O}_3\text{Si}_2$  326.1733; Found 326.1738.

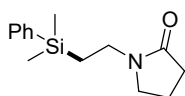

#### 1-(2-(Dimethyl(phenyl)silyl)ethyl)pyrrolidin-2-one (9c)

According to the general procedure **B**, **8c** (22 mg, 0.2 mmol, 1.0 equiv.), **1a** (78 mg, 0.3 mmol, 1.5 equiv.), 4CzIPN (4.7 mg, 0.006 mmol, 3 mol%),  $^i\text{Pr}_3\text{SiSH}$  (3.8 mg, 0.02 mmol, 10 mol%),  $\text{CH}_3\text{CN}$  (2.0 mL), MeOH (2.0 mL) were used. Crude product was purified by flash column chromatography on silica gel (PE/EA = 10 : 1) and 35 mg of **9c** was obtained as a colorless oil in 70% yield.  $^1\text{H}$  NMR (400 MHz,  $\text{CDCl}_3$ )  $\delta$  7.52 – 7.50 (m, 2H), 7.36 – 7.34 (m, 3H), 3.37 – 3.32 (m, 2H), 3.28 – 3.25 (m, 2H), 2.30 – 2.25 (m, 2H), 1.87 – 1.82 (m, 2H), 1.07 – 1.02 (m, 2H), 0.32 (s, 6H);  $^{13}\text{C}$  NMR (100 MHz,  $\text{CDCl}_3$ )  $\delta$  174.3, 138.3, 133.4, 129.1, 127.8, 46.2, 38.4, 31.2, 17.6, 14.4, -3.2; HRMS (EI)  $m/z$ :  $[\text{M}]^+$  Calcd for  $\text{C}_{14}\text{H}_{21}\text{NOSi}$  247.1392; Found 247.1390.

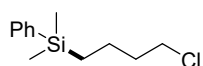

#### (4-Chlorobutyl)dimethyl(phenyl)silane (9d)

According to the general procedure **B**, **8d** (18 mg, 0.2 mmol, 1.0 equiv.), **1a** (78 mg, 0.3 mmol, 1.5 equiv.), 4CzIPN (4.7 mg, 0.006 mmol, 3 mol%),  $i\text{Pr}_3\text{SiSH}$  (3.8 mg, 0.02 mmol, 10 mol%),  $\text{CH}_3\text{CN}$  (2.0 mL), MeOH (2.0 mL) were used. Crude product was purified by flash column chromatography on silica gel (PE/EA = 100 : 1) and 33 mg of **9d** was obtained as a colorless oil in 74% yield.  $^1\text{H}$  NMR (400 MHz,  $\text{CDCl}_3$ )  $\delta$  7.52 – 7.49 (m, 2H), 7.36 – 7.33 (m, 3H), 3.53 – 3.50 (m, 2H), 1.81 – 1.76 (m, 2H), 1.50 – 1.44 (m, 2H), 0.78 – 0.74 (m, 2H), 0.27 (s, 6H);  $^{13}\text{C}$  NMR (100 MHz,  $\text{CDCl}_3$ )  $\delta$  139.2, 133.5, 128.9, 127.8, 44.7, 36.1, 21.2, 15.0, -3.1. HRMS (EI)  $m/z$ :  $[\text{M}]^+$  Calcd for  $\text{C}_{12}\text{H}_{19}\text{ClSi}$  226.0945; Found 226.0948.

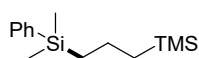

#### (3-(dimethyl(phenyl)silyl)propyl)trimethylsilane (9e)

According to the general procedure **B**, **8e** (23 mg, 0.2 mmol, 1.0 equiv.), **1a** (78 mg, 0.3 mmol, 1.5 equiv.), 4CzIPN (4.7 mg, 0.006 mmol, 3 mol%),  $i\text{Pr}_3\text{SiSH}$  (3.8 mg, 0.02 mmol, 10 mol%),  $\text{CH}_3\text{CN}$  (2.0 mL), MeOH (2.0 mL) were used. Crude product was purified by flash column chromatography on silica gel (PE/EA = 100 : 1) and 27 mg of **9e** was obtained as a colorless oil in 54% yield.  $^1\text{H}$  NMR (400 MHz,  $\text{CDCl}_3$ )  $\delta$  7.57 – 7.54 (m, 2H), 7.41 – 7.36 (m, 3H), 1.46 – 1.40 (m, 2H), 0.88 – 0.84 (m, 2H), 0.62 – 0.58 (m, 2H), 0.30 (s, 6H), 0.00 (s, 9H);  $^{13}\text{C}$  NMR (100 MHz,  $\text{CDCl}_3$ )  $\delta$  141.4, 135.1, 130.2, 129.2, 31.2, 22.8, 21.7, 19.9, 2.6, -1.4. HRMS (EI)  $m/z$ :  $[\text{M}]^+$  Calcd for  $\text{C}_{14}\text{H}_{26}\text{Si}_2$  250.1573; Found 250.1578.

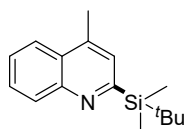

#### 2-(tert-Butyltrimethylsilyl)-4-methylquinoline (11a)

According to the general procedure **C**, **10a** (29 mg, 0.2 mmol, 1.0 equiv.), **1d** (82 mg, 0.3 mmol, 1.5 equiv.), TFA (23 mg, 0.2 mmol, 1.0 equiv.), 4CzIPN (4.7 mg, 0.006 mmol, 3 mol%),  $\text{CH}_3\text{CN}$  (2.0 mL), MeOH (2.0 mL) were used. Crude product was purified by flash column chromatography on silica gel (PE/EA = 50 : 1) and 36 mg of **11a** was obtained as a colorless oil in 70% yield.  $^1\text{H}$  NMR (400 MHz,  $\text{CDCl}_3$ )  $\delta$  8.21 (dd,  $J$  = 8.4, 0.5 Hz, 1H), 7.99 (dd,  $J$  = 8.3, 0.7 Hz, 1H), 7.70 (ddd,  $J$  = 8.3, 6.9, 1.3 Hz, 1H), 7.55 (ddd,  $J$  = 8.2, 6.9, 1.3 Hz, 1H), 7.44 (s, 1H), 2.73 (s, 3H), 1.02 (s, 9H), 0.45 (s, 6H);  $^{13}\text{C}$  NMR (100 MHz,  $\text{CDCl}_3$ )  $\delta$  168.6, 148.4, 140.2, 130.8, 128.4, 127.3, 127.0, 126.0, 123.6, 26.7, 18.6, 17.2, -6.2; HRMS (ESI-TOF)  $m/z$ :  $[\text{M} + \text{H}]^+$  Calcd for  $\text{C}_{16}\text{H}_{24}\text{NSi}$  258.1678; Found 258.1668.

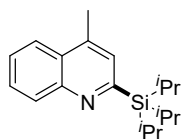

#### 4-methyl-2-(triisopropylsilyl)quinoline (11b)

According to the general procedure **C**, **10a** (29 mg, 0.2 mmol, 1.0 equiv.), **1g** (85 mg, 0.3 mmol, 1.5 equiv.), TFA (23 mg, 0.2 mmol, 1.0 equiv.), 4CzIPN (4.7 mg, 0.006 mmol, 3 mol%), CH<sub>3</sub>CN (2.0 mL), MeOH (2.0 mL) were used. Crude product was purified by flash column chromatography on silica gel (PE/EA = 50 : 1) and 39 mg of **11b** was obtained as a colorless oil in 65% yield. <sup>1</sup>H NMR (400 MHz, CDCl<sub>3</sub>) δ 8.08 – 8.05 (m, 1H), 7.91 – 7.87 (m, 1H), 7.60 – 7.56 (m, 1H), 7.46 – 7.42 (m, 1H), 7.29 (s, 1H), 2.60 (s, 3H), 1.54 – 1.46 (m, 3H), 1.08 (d, *J* = 8.3, 18H); <sup>13</sup>C NMR (100 MHz, CDCl<sub>3</sub>) δ 166.3, 147.5, 138.7, 129.8, 127.2, 126.7, 126.2, 124.9, 122.6, 28.7, 17.7, 10.2, -7.2; HRMS (ESI-TOF) *m/z*: [M + H]<sup>+</sup> Calcd for C<sub>19</sub>H<sub>30</sub>NSi 300.2148; Found 300.2155.

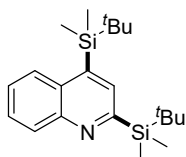

### 2,4-bis(tert-butyltrimethylsilyl)quinoline (**11c**)

According to the general procedure **C**, **10c** (26 mg, 0.2 mmol, 1.0 equiv.), **1d** (82 mg, 0.3 mmol, 1.5 equiv.), TFA (23 mg, 0.2 mmol, 1.0 equiv.), 4CzIPN (4.7 mg, 0.006 mmol, 3 mol%), CH<sub>3</sub>CN (2.0 mL), MeOH (2.0 mL) were used. Crude product was purified by flash column chromatography on silica gel (PE/EA = 50 : 1) and 46 mg of **11c** was obtained as a colorless oil in 65% yield. <sup>1</sup>H NMR (400 MHz, CDCl<sub>3</sub>) δ 8.19 – 8.17 (m, 1H), 8.02 – 8.00 (m, 1H), 7.66 (s, 1H), 7.73 – 7.63 (m, 1H), 7.50 – 7.44 (m, 1H), 0.96 (s, 9H), 0.93 (s, 9H), 0.51 (s, 6H), 0.41 (s, 6H); <sup>13</sup>C NMR (100 MHz, CDCl<sub>3</sub>) δ 166.6, 148.2, 141.9, 134.3, 131.4, 129.0, 128.1, 125.7, 27.0, 26.7, 17.7, 17.3, -3.3, -6.2; HRMS (ESI-TOF) *m/z*: [M + H]<sup>+</sup> Calcd for C<sub>21</sub>H<sub>36</sub>NSi<sub>2</sub> 358.2381; Found 358.2387.

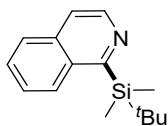

### 1-(tert-Butyltrimethylsilyl)isoquinoline (**11d**)

According to the general procedure **C**, **10d** (26 mg, 0.2 mmol, 1.0 equiv.), **1d** (82 mg, 0.3 mmol, 1.5 equiv.), TFA (23 mg, 0.2 mmol, 1.0 equiv.), 4CzIPN (4.7 mg, 0.006 mmol, 3 mol%), CH<sub>3</sub>CN (2.0 mL), MeOH (2.0 mL) were used. Crude product was purified by flash column chromatography on silica gel (PE/EA = 50 : 1) and 35 mg of **11d** was obtained as a colorless oil in 72% yield. <sup>1</sup>H NMR (400 MHz, CDCl<sub>3</sub>) δ 8.71 (d, *J* = 5.6 Hz, 1H), 8.25 (dd, *J* = 8.5, 1.1 Hz, 1H), 7.84 – 7.76 (m, 1H), 7.65 – 7.61 (m, 1H), 7.58 – 7.54 (m, 1H), 0.96 (s, 9H), 0.56 (s, 6H); <sup>13</sup>C NMR (100 MHz, CDCl<sub>3</sub>) δ 169.4, 141.7, 133.2, 132.9, 132.1, 128.4, 127.8, 126.8, 125.5, 119.0, 26.2, 17.1, -3.9; HRMS (ESI-TOF) *m/z*: [M + H]<sup>+</sup> Calcd for C<sub>15</sub>H<sub>22</sub>NSi 244.1522; Found 244.1526.

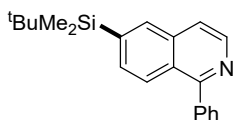

### 6-(tert-Butyltrimethylsilyl)-1-phenylisoquinoline (**11e**)

According to the general procedure **C**, **10e** (41 mg, 0.2 mmol, 1.0 equiv.), **1d** (82 mg, 0.3 mmol, 1.5 equiv.), TFA (23 mg, 0.2 mmol, 1.0 equiv.), 4CzIPN (4.7 mg, 0.006 mmol, 3 mol%), CH<sub>3</sub>CN (2.0 mL), MeOH (2.0 mL) were used. Crude product was purified by flash column chromatography on silica gel (PE/EA = 20 : 1) and 41 mg of **11e** was obtained as a colorless oil in 65% yield. <sup>1</sup>H NMR

(400 MHz, CDCl<sub>3</sub>)  $\delta$  8.62 (d,  $J$  = 5.7 Hz, 1H), 8.10 – 7.99 (m, 2H), 7.74 – 7.66 (m, 2H), 7.66 – 7.60 (m, 2H), 7.57 – 7.47 (m, 3H), 0.92 (s, 9H), 0.38 (s, 6H); <sup>13</sup>C NMR (100 MHz, CDCl<sub>3</sub>)  $\delta$  160.2, 141.7, 140.9, 139.0, 135.5, 133.5, 131.9, 129.5, 128.2, 127.9, 125.4, 119.6, 26.1, 16.6, –6.6; HRMS (ESI–TOF)  $m/z$ : [M + H]<sup>+</sup> Calcd for C<sub>21</sub>H<sub>26</sub>NSi 320.1835; Found 320.1837.

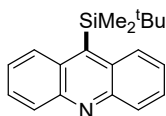

#### 9-(tert-Butyldimethylsilyl)acridine (11f)

According to the general procedure C, **10f** (36 mg, 0.2 mmol, 1.0 equiv.), **1d** (82 mg, 0.3 mmol, 1.5 equiv.), TFA (23 mg, 0.2 mmol, 1.0 equiv.), 4CzIPN (4.7 mg, 0.006 mmol, 3 mol%), CH<sub>3</sub>CN (2.0 mL), MeOH (2.0 mL) were used. Crude product was purified by flash column chromatography on silica gel (PE/EA = 20 : 1) and 29 mg of **11f** was obtained as a colorless oil in 50% yield. <sup>1</sup>H NMR (400 MHz, CDCl<sub>3</sub>)  $\delta$  8.34 (d,  $J$  = 8.7, 2H), 8.25 (d,  $J$  = 8.7, 2H), 7.76 – 7.70 (m, 2H), 7.54 – 7.48 (m, 2H), 1.18 (s, 9H), 0.69 (s, 6H); <sup>13</sup>C NMR (100 MHz, CDCl<sub>3</sub>)  $\delta$  148.8, 142.6, 132.6, 129.2, 128.8, 127.6, 126.4, 126.1, 119.1, 27.1, 26.7, 17.2, –6.1; HRMS (ESI–TOF)  $m/z$ : [M + H]<sup>+</sup> Calcd for C<sub>19</sub>H<sub>24</sub>NSi 294.1678; Found 294.1683.

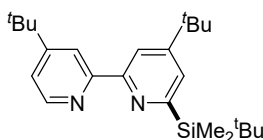

#### 4,4'-di-tert-Butyl-6-(tert-butyldimethylsilyl)-2,2'-bipyridine (11g)

According to the general procedure C, **10g** (54 mg, 0.2 mmol, 1.0 equiv.), **1d** (82 mg, 0.3 mmol, 1.5 equiv.), TFA (23 mg, 0.2 mmol, 1.0 equiv.), 4CzIPN (4.7 mg, 0.006 mmol, 3 mol%), CH<sub>3</sub>CN (2.0 mL), MeOH (2.0 mL) were used. Crude product was purified by flash column chromatography on silica gel (PE/EA = 20 : 1) and 40 mg of **11g** was obtained as a colorless oil in 52% yield. <sup>1</sup>H NMR (400 MHz, CDCl<sub>3</sub>)  $\delta$  8.67 (s, 1H), 8.58 (d,  $J$  = 5.2 Hz, 1H), 8.33 (s, 1H), 7.49 (s, 1H), 7.28 (d,  $J$  = 5.2, 1H), 1.39 (s, 9H), 1.38 (s, 9H), 1.00 (s, 6H), 0.37 (s, 6H). <sup>13</sup>C NMR (100 MHz, CDCl<sub>3</sub>)  $\delta$  165.3, 158.1, 157.2, 155.5, 126.4, 120.5, 118.7, 116.6, 30.7, 30.5, 26.7, 17.0, –6.1; HRMS (ESI–TOF)  $m/z$ : [M + H]<sup>+</sup> Calcd for C<sub>24</sub>H<sub>39</sub>N<sub>2</sub>Si 383.2883; Found 383.2887.

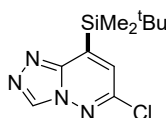

#### 8-(tert-butyldimethylsilyl)-6-chloro-[1,2,4]triazolo[4,3-b]pyridazine (11h)

According to the general procedure C, **10h** (31 mg, 0.2 mmol, 1.0 equiv.), **1d** (82 mg, 0.3 mmol, 1.5 equiv.), TFA (23 mg, 0.2 mmol, 1.0 equiv.), 4CzIPN (4.7 mg, 0.006 mmol, 3 mol%), CH<sub>3</sub>CN (2.0 mL), MeOH (2.0 mL) were used. Crude product was purified by flash column chromatography on silica gel (PE/EA = 10 : 1) and 31 mg of **11h** was obtained as a colorless oil in 58% yield. <sup>1</sup>H NMR (400 MHz, CDCl<sub>3</sub>)  $\delta$  8.94 (s, 1H), 7.20 (s, 1H), 0.92 (s, 9H), 0.46 (s, 6H); <sup>13</sup>C NMR (100 MHz, CDCl<sub>3</sub>)  $\delta$  137.8, 134.0, 133.6, 133.0, 129.1, 115.5, 101.5, 26.7, –6.9; HRMS (ESI–TOF)  $m/z$ : [M + H]<sup>+</sup> Calcd for C<sub>11</sub>H<sub>18</sub>ClN<sub>4</sub>Si 269.0984; Found 269.0988.

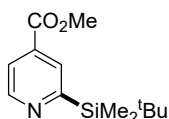

#### methyl 2-(tert-Butyldimethylsilyl)isonicotinate (**11i**)

According to the general procedure **C**, **10i** (27 mg, 0.2 mmol, 1.0 equiv.), **1d** (82 mg, 0.3 mmol, 1.5 equiv.), TFA (23 mg, 0.2 mmol, 1.0 equiv.), 4CzIPN (4.7 mg, 0.006 mmol, 3 mol%), CH<sub>3</sub>CN (2.0 mL), MeOH (2.0 mL) were used. Crude product was purified by flash column chromatography on silica gel (PE/EA = 20 : 1) and 30 mg of **11i** was obtained as a colorless oil in 60% yield. <sup>1</sup>H NMR (400 MHz, CDCl<sub>3</sub>) δ 8.93 (d, *J* = 5.0 Hz, 1H), 8.00 (s, 1.0 Hz), 7.71 (d, *J* = 5.0 Hz, 1H), 3.94 (s, 3H), 0.90 (s, 9H), 0.34 (s, 6H); <sup>13</sup>C NMR (100 MHz, CDCl<sub>3</sub>) δ 168.4, 166.4, 150.5, 134.7, 128.3, 121.4, 52.6, 26.5, 17.0, -6.3; HRMS (ESI-TOF) *m/z*: [M + H]<sup>+</sup> Calcd for C<sub>13</sub>H<sub>22</sub>NO<sub>2</sub>Si 252.1414; Found 252.1417.

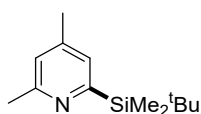

#### 2-(tert-Butyldimethylsilyl)-4,6-dimethylpyridine (**11j**)

According to the general procedure **C**, **10j** (21 mg, 0.2 mmol, 1.0 equiv.), **1d** (82 mg, 0.3 mmol, 1.5 equiv.), TFA (23 mg, 0.2 mmol, 1.0 equiv.), 4CzIPN (4.7 mg, 0.006 mmol, 3 mol%), CH<sub>3</sub>CN (2.0 mL), MeOH (2.0 mL) were used. Crude product was purified by flash column chromatography on silica gel (PE/EA = 20 : 1) and 23 mg of **11j** was obtained as a colorless oil in 52% yield. <sup>1</sup>H NMR (400 MHz, CDCl<sub>3</sub>) δ 7.10 (s, 1H), 6.86 (s, 1H), 2.51 (s, 3H), 2.27 (s, 3H), 0.91 (s, 9H), 0.28 (s, 6H); <sup>13</sup>C NMR (100 MHz, CDCl<sub>3</sub>) δ 165.3, 157.8, 128.1, 123.0, 38.1, 31.2, 26.7, 20.9, -6.2; HRMS (ESI-TOF) *m/z*: [M + H]<sup>+</sup> Calcd for C<sub>13</sub>H<sub>24</sub>NSi 222.1678; Found 222.1680.

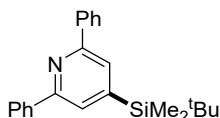

#### 4-(tert-Butyldimethylsilyl)-2,6-diphenylpyridine (**11k**)

According to the general procedure **A**, **10k** (46 mg, 0.2 mmol, 1.0 equiv.), **1d** (82 mg, 0.3 mmol, 1.5 equiv.), TFA (23 mg, 0.2 mmol, 1.0 equiv.), 4CzIPN (4.7 mg, 0.006 mmol, 3 mol%), CH<sub>3</sub>CN (2.0 mL), MeOH (2.0 mL) were used. Crude product was purified by flash column chromatography on silica gel (PE/EA = 20 : 1) and 33 mg of **11k** was obtained as a colorless oil in 48% yield. <sup>1</sup>H NMR (400 MHz, CDCl<sub>3</sub>) δ 8.07 – 8.03 (m, 4H), 7.70 (m, 2H), 7.45 – 7.41 (m, 4H), 7.39 – 7.35 (m, 2H), 0.88 (s, 9H), 0.31 (s, 6H); <sup>13</sup>C NMR (100 MHz, CDCl<sub>3</sub>) δ 155.9, 149.2, 135.8, 128.8, 128.6, 124.3, 122.5, 118.6, 26.5, 13.1, -7.3; HRMS (ESI-TOF) *m/z*: [M + H]<sup>+</sup> Calcd for C<sub>23</sub>H<sub>28</sub>NSi 346.1986; Found 346.1995.

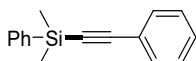

#### Dimethyl(phenyl)(phenylethynyl)silane (**13a**)

According to the general procedure **D**, **12a** (70 mg, 0.2 mmol, 1.0 equiv.), **1a** (78 mg, 0.3 mmol, 1.5 equiv.), 4CzIPN (4.7 mg, 0.006 mmol, 3 mol%), CH<sub>3</sub>CN (2.0 mL), MeOH (2.0 mL) were used. Crude product was purified by flash column chromatography on silica gel (PE/EA = 100 : 1) and 35 mg of

**13a** was obtained as a colorless oil in 75% yield.  $^1\text{H NMR}$  (400 MHz,  $\text{CDCl}_3$ )  $\delta$  7.70 – 7.68 (m, 2H), 7.52 – 7.49 (m, 2H), 7.42 – 7.38 (m, 3H), 7.32 – 7.28 (m, 3H), 0.49 (s, 6H);  $^{13}\text{C NMR}$  (100 MHz,  $\text{CDCl}_3$ )  $\delta$  137.8, 134.6, 132.9, 130.2, 129.5, 129.0, 128.7, 123.7, 107.6, 92.8, 0.0; HRMS (EI)  $m/z$ :  $[\text{M}]^+$  Calcd for  $\text{C}_{16}\text{H}_{17}\text{Si}$  226.1021; Found 226.1026.

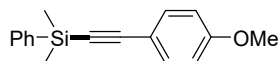

#### **((4-Methoxyphenyl)ethynyl)dimethyl(phenyl)silane (13b)**

According to the general procedure **D**, **12b** (76 mg, 0.2 mmol, 1.0 equiv.), **1a** (78 mg, 0.3 mmol, 1.5 equiv.), 4CzIPN (4.7 mg, 0.006 mmol, 3 mol%),  $\text{CH}_3\text{CN}$  (2.0 mL), MeOH (2.0 mL) were used. Crude product was purified by flash column chromatography on silica gel (PE/EA = 100 : 1) and 30 mg of **13b** was obtained as a colorless oil in 56% yield.  $^1\text{H NMR}$  (400 MHz,  $\text{CDCl}_3$ )  $\delta$  7.70 – 7.67 (m, 2H), 7.46 – 7.42 (m, 2H), 7.40 – 7.36 (m, 3H), 6.84 – 6.82 (m, 2H), 3.81 (s, 3H), 0.48 (s, 6H);  $^{13}\text{C NMR}$  (100 MHz,  $\text{CDCl}_3$ )  $\delta$  160.8, 138.2, 134.7, 134.5, 130.3, 128.8, 116.0, 114.7, 107.8, 91.3, 56.2, -0.2; HRMS (EI)  $m/z$ :  $[\text{M}]^+$  Calcd for  $\text{C}_{17}\text{H}_{18}\text{OSi}$  266.1127; Found 266.1135.

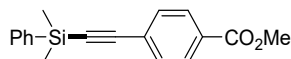

#### **((4-Methoxyphenyl)ethynyl)dimethyl(phenyl)silane (13c)**

According to the general procedure **D**, **12c** (81 mg, 0.2 mmol, 1.0 equiv.), **1a** (78 mg, 0.3 mmol, 1.5 equiv.), 4CzIPN (4.7 mg, 0.006 mmol, 3 mol%),  $\text{CH}_3\text{CN}$  (2.0 mL), MeOH (2.0 mL) were used. Crude product was purified by flash column chromatography on silica gel (PE/EA = 20 : 1) and 48 mg of **13c** was obtained as a colorless oil in 82% yield.  $^1\text{H NMR}$  (400 MHz,  $\text{CDCl}_3$ )  $\delta$  8.00 – 7.96 (m, 2H), 7.68 – 7.64 (m, 2H), 7.68 – 7.64 (m, 2H), 7.48 – 7.44 (m, 2H), 7.41 – 7.36 (m, 3H), 3.99 (s, 3H), 0.40 (s, 6H);  $^{13}\text{C NMR}$  (100 MHz,  $\text{CDCl}_3$ )  $\delta$  166.8, 139.3, 134.2, 132.4, 130.5, 129.8, 128.7, 128.0, 83.1, 80.4, 52.6, -3.6; HRMS (EI)  $m/z$ :  $[\text{M}]^+$  Calcd for  $\text{C}_{18}\text{H}_{18}\text{O}_2\text{Si}$  294.1076; Found 294.1084.

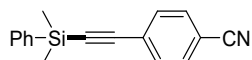

#### **4-((Dimethyl(phenyl)silyl)ethynyl)benzonitrile (13d)**

According to the general procedure **D**, **12d** (74 mg, 0.2 mmol, 1.0 equiv.), **1a** (78 mg, 0.3 mmol, 1.5 equiv.), 4CzIPN (4.7 mg, 0.006 mmol, 3 mol%),  $\text{CH}_3\text{CN}$  (2.0 mL), MeOH (2.0 mL) were used. Crude product was purified by flash column chromatography on silica gel (PE/EA = 20 : 1) and 40 mg of **13d** was obtained as a colorless oil in 77% yield.  $^1\text{H NMR}$  (400 MHz,  $\text{CDCl}_3$ )  $\delta$  7.65 – 7.62 (m, 2H), 7.54 – 7.50 (m, 2H), 7.40 – 7.36 (m, 2H), 7.33 – 7.28 (m, 3H), 0.32 (s, 6H);  $^{13}\text{C NMR}$  (100 MHz,  $\text{CDCl}_3$ )  $\delta$  139.0, 133.9, 132.1, 128.4, 127.7, 127.0, 118.3, 112.3, 81.9, 81.6, -3.9; HRMS (EI)  $m/z$ :  $[\text{M}]^+$  Calcd for  $\text{C}_{17}\text{H}_{15}\text{NSi}$  261.0974; Found 261.0978.

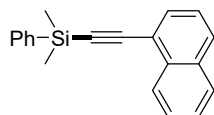

#### **Dimethyl(naphthalen-1-ylethynyl)(phenyl)silane (13e)**

According to the general procedure **D**, **12e** (80 mg, 0.2 mmol, 1.0 equiv.), **1a** (78 mg, 0.3 mmol, 1.5 equiv.), 4CzIPN (4.7 mg, 0.006 mmol, 3 mol%),  $\text{CH}_3\text{CN}$  (2.0 mL), MeOH (2.0 mL) were used. Crude

product was purified by flash column chromatography on silica gel (PE/EA = 50 : 1) and 34 mg of **13e** was obtained as a colorless oil in 60% yield. <sup>1</sup>H NMR (400 MHz, CDCl<sub>3</sub>) δ 8.36 – 8.33 (m, 1H), 7.85 – 7.81 (m, 2H), 7.79 – 7.72 (m, 3H), 7.58 – 7.52 (m, 2H), 7.52 – 7.49 (m, 1H), 7.74 – 7.40 (m, 4H), 0.58 (s, 6H); <sup>13</sup>C NMR (100 MHz, CDCl<sub>3</sub>) δ 136.2, 133.0, 132.6, 132.2, 130.2, 128.6, 127.4, 126.8, 126.1, 125.6, 125.3, 124.2, 119.7, 103.9, 96.4, –1.5; HRMS (EI) m/z: [M]<sup>+</sup> Calcd for C<sub>20</sub>H<sub>18</sub>Si 286.1178; Found 286.1185.

### Synthesis of methyl (Z)-2-((dimethyl(phenyl)silyl)methyl)-3-phenylacrylate (**14a**)

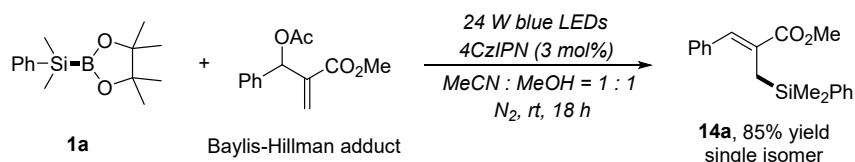

According to the general procedure A, **Baylis-Hillman adduct** (47 mg, 0.2 mmol, 1.0 equiv.), **1a** (78 mg, 0.3 mmol, 1.5 equiv.), 4CzIPN (4.7 mg, 0.006 mmol, 3 mol%), CH<sub>3</sub>CN (2.0 mL), MeOH (2.0 mL) were used. Crude product was purified by flash column chromatography on silica gel (PE/EA = 20 : 1) and 53 mg of **14a** was obtained as a colorless oil in 85% yield. <sup>1</sup>H NMR (400 MHz, CDCl<sub>3</sub>) δ 7.54 – 7.50 (m, 2H), 7.40 – 7.36 (m, 3H), 7.38 – 7.30 (m, 2H), 7.28 – 7.25 (m, 1H), 7.22 – 7.18 (m, 2H), 6.38 (s, 1H), 3.46 (s, 3H), 2.13 (s, 2H), 0.36 (s, 6H); <sup>13</sup>C NMR (100 MHz, CDCl<sub>3</sub>) δ 133.7, 132.6, 132.1, 130.2, 129.2, 128.8, 127.7, 127.2, 126.3, 126.1, 53.4, 51.4, 27.0, 26.7, 25.2, –3.3, –6.2; HRMS (ESI-TOF) m/z: [M + Na]<sup>+</sup> Calcd for C<sub>19</sub>H<sub>22</sub>O<sub>2</sub>SiNa 333.1287; Found 333.1282.

### Synthesis of 3-((dimethyl(phenyl)silyl)methyl)-1,3-dimethylindolin-2-one (**15a**)

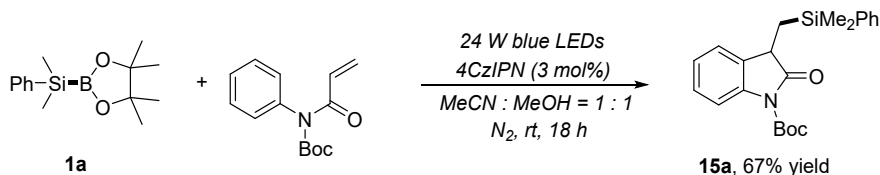

According to the general procedure A, **alkene** (35 mg, 0.2 mmol, 1.0 equiv.), **1a** (78 mg, 0.3 mmol, 1.5 equiv.), 4CzIPN (4.7 mg, 0.006 mmol, 3 mol%), CH<sub>3</sub>CN (2.0 mL), MeOH (2.0 mL) were used. Crude product was purified by flash column chromatography on silica gel (PE/EA = 10 : 1) and 41 mg of **15a** was obtained as a colorless oil in 67% yield. <sup>1</sup>H NMR (400 MHz, CDCl<sub>3</sub>) δ 7.27 – 7.17 (m, 6H), 7.07 (d, *J* = 7.3 Hz, 1H), 6.97 – 6.93 (m, 1H), 6.70 (d, *J* = 7.3 Hz, 1H), 2.90 (s, 3H), 2.04 (d, *J* = 14.7 Hz, 1H), 1.64 (d, *J* = 14.7 Hz, 1H), 1.38 (s, 3H), –0.05 (s, 3H), –0.11 (s, 3H); <sup>13</sup>C NMR (100 MHz, CDCl<sub>3</sub>) δ 178.1, 135.1, 133.7, 133.1, 130.0, 128.4, 115.3, 70.9, 30.4, 23.9, 0.0, –3.6; HRMS (ESI-TOF) m/z: [M + Na]<sup>+</sup> Calcd for C<sub>19</sub>H<sub>23</sub>NOSiNa 332.1447; Found 332.1440.

### Synthesis of methyl 2-(bis(tert-butoxycarbonyl)amino)-3-((4,4,5,5-tetramethyl-1,3,2-dioxaborolan-2-yl)propanoate (**17a**)

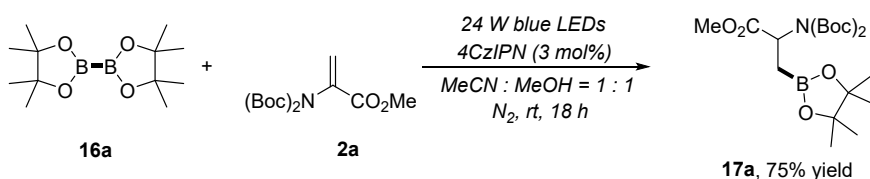

To a 25 mL Schlenk tube equipped with a magnetic stir bar was added the 4CzIPN (4.7 mg, 0.006

mmol). After that CH<sub>3</sub>CN (2.0 mL), MeOH (2.0 mL), **2a** (0.2 mmol), **16a** (0.3 mmol) and were added sequentially by means of syringe. The resulting solution was degassed for 15 min by bubbling N<sub>2</sub> stream, then stirred at room temperature under the irradiation of 24 W blue LED for 18 hours. The solvent was removed on a rotary evaporator under reduced pressure and the crude product was purified by flash silica–gel column chromatography (PE/EA = 20 : 1) to give the products **17a** (64mg) as a colorless oil in 67% yield. <sup>1</sup>H NMR (400 MHz, CDCl<sub>3</sub>) δ 5.17 (dd, *J* = 10.4, 5.2 Hz, 1H), 3.69 (s, 3H), 1.70 (dd, *J* = 15.4, 10.4 Hz, 1H), 1.49 (s, 18H), 1.23 (d, *J* = 10.6 Hz, 12H), 1.13 (dd, *J* = 15.4, 5.2 Hz, 1H); <sup>13</sup>C NMR (100 MHz, CDCl<sub>3</sub>) δ 172.0, 151.8, 83.8, 82.9, 55.7, 52.2, 28.0, 24.8, 24.6; HRMS (ESI–TOF) *m/z*: [M + Na]<sup>+</sup> Calcd for C<sub>20</sub>H<sub>36</sub>NBO<sub>8</sub>SiNa 452.2432; Found 452.2426.

### Synthesis of methyl 2–(bis(tert–butoxycarbonyl)amino)–3–(tributylstannyl)propanoate (**19a**)

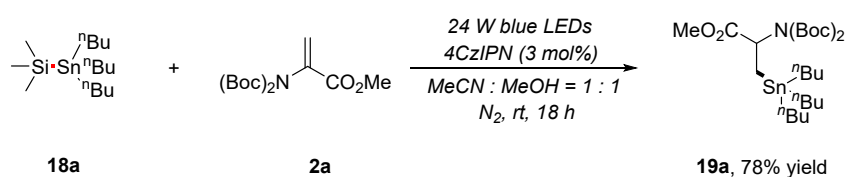

To a 25 mL Schlenk tube equipped with a magnetic stir bar was added the 4CzIPN (4.7 mg, 0.006 mmol). After that CH<sub>3</sub>CN (2.0 mL), MeOH (2.0 mL), **2a** (0.2 mmol), **18a** (0.3 mmol) and were added sequentially by means of syringe. The resulting solution was degassed for 15 min by bubbling N<sub>2</sub> stream, then stirred at room temperature under the irradiation of 24 W blue LED for 18 hours. The solvent was removed on a rotary evaporator under reduced pressure and the crude product was purified by flash silica–gel column chromatography (PE/EA = 20 : 1) to give the products **19a** (92mg) as a colorless oil in 78% yield. <sup>1</sup>H NMR (400 MHz, CDCl<sub>3</sub>) 5.03 (dd, *J* = 9.9, 6.8 Hz, 1H), 3.70 (s, 3H), 1.56 (dd, *J* = 12.8, 9.9 Hz, 1H), 1.50 (s, 18H), 1.50 – 1.39 (m, 4H), 1.35 – 1.25 (m, 6H), 1.16 (dd, *J* = 12.8, 6.8 Hz, 1H), 0.97 – 0.75 (m, 18H); <sup>13</sup>C NMR (100 MHz, CDCl<sub>3</sub>) δ 172.7, 151.9, 82.8, 58.0, 52.3, 29.1, 28.0, 27.4, 13.7, 10.7, 9.6; HRMS (ESI–TOF) *m/z*: [M + Na]<sup>+</sup> Calcd for C<sub>26</sub>H<sub>51</sub>NO<sub>6</sub>SnNa 616.2636; Found 616.2645.

### Synthesis of methyl 2–(bis(tert–butoxycarbonyl)amino)–3–(trimethylstannyl)propanoate (**21a**)

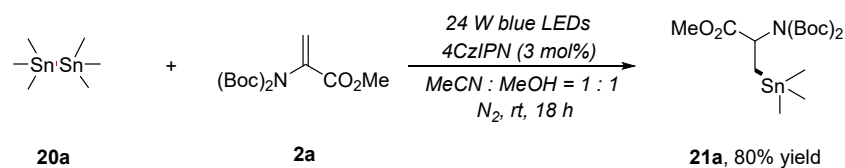

To a 25 mL Schlenk tube equipped with a magnetic stir bar was added the 4CzIPN (4.7 mg, 0.006 mmol). After that CH<sub>3</sub>CN (2.0 mL), MeOH (2.0 mL), **2a** (0.2 mmol), **20a** (0.3 mmol) and were added sequentially by means of syringe. The resulting solution was degassed for 15 min by bubbling N<sub>2</sub> stream, then stirred at room temperature under the irradiation of 24 W blue LED for 18 hours. The solvent was removed on a rotary evaporator under reduced pressure and the crude product was purified by flash silica–gel column chromatography (PE/EA = 20 : 1) to give the products **21a** (75mg) as a colorless oil in 67% yield. <sup>1</sup>H NMR (400 MHz, CDCl<sub>3</sub>) δ 4.94 (dd, *J* = 10.2, 6.6 Hz, 1H), 3.59 (s, 3H), 1.50 (dd, *J* = 12.7, 10.2 Hz, 1H), 1.40 (s, 18H), 1.07 (dd, *J* = 12.7, 6.6 Hz, 1H), 0.00 (s, 9H); <sup>13</sup>C NMR (100 MHz, CDCl<sub>3</sub>) δ 171.9, 151.1, 82.1, 57.0, 27.2, 12.2, –9.9; <sup>13</sup>C NMR (100 MHz, CDCl<sub>3</sub>) δ

171.8, 151.1, 82.1, 57.0, 27.2, 12.2, -9.9; HRMS (ESI-TOF)  $m/z$ :  $[M + Na]^+$  Calcd for  $C_{17}H_{33}NO_6SnNa$  490.1228; Found 490.1234.

### Synthesis of methyl N,N-bis(tert-butoxycarbonyl)-S-phenylcysteinate (**23a**)

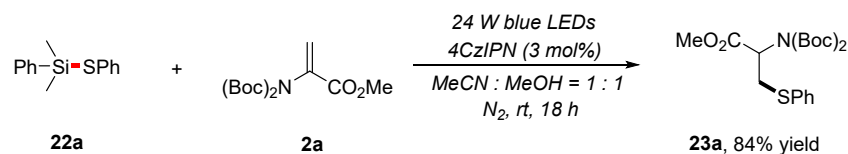

To a 25 mL Schlenk tube equipped with a magnetic stir bar was added the 4CzIPN (4.7 mg, 0.006 mmol). After that  $\text{CH}_3\text{CN}$  (2.0 mL), MeOH (2.0 mL), **2a** (0.2 mmol), **22a** (0.3 mmol) and were added sequentially by means of syringe. The resulting solution was degassed for 15 min by bubbling  $\text{N}_2$  stream, then stirred at room temperature under the irradiation of 24 W blue LED for 18 hours. The solvent was removed on a rotary evaporator under reduced pressure and the crude product was purified by flash silica-gel column chromatography (PE/EA = 20 : 1) to give the products **23a** (66mg) as a colorless oil in 67% yield.  $^1\text{H NMR}$  (400 MHz,  $\text{CDCl}_3$ )  $\delta$  7.42 – 7.32 (m, 2H), 7.32 – 7.23 (m, 2H), 7.23 – 7.16 (m, 1H), 5.10 (dd,  $J$  = 9.9, 4.6 Hz, 1H), 3.76 – 3.72 (m, 1H), 3.73 (s, 3H), 3.47 (dd,  $J$  = 14.6, 9.9 Hz, 1H), 1.45 (s, 18H);  $^{13}\text{C NMR}$  (100 MHz,  $\text{CDCl}_3$ )  $\delta$  169.2, 150.8, 134.7, 128.7, 128.0, 125.4, 82.3, 56.8, 51.4, 33.8, 26.9; HRMS (ESI-TOF)  $m/z$ :  $[M + Na]^+$  Calcd for  $C_{20}H_{29}NO_6\text{SNa}$  434.1613; Found 434.1620.

### Investigation of the model reaction under the irradiation of sunlight

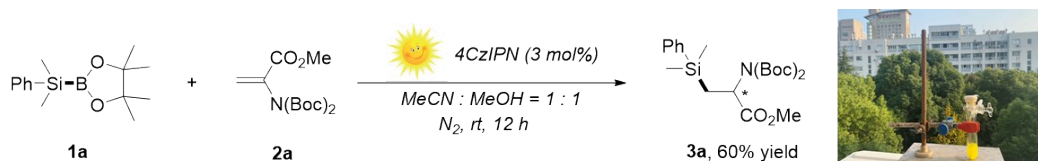

On November 8th of 2022, the model reaction was performed following the general procedure A outside the window of the school of Pharmacy, East China University of Science and Technology, Shanghai. **1a** and **2a** were used as starting materials and employing natural sunlight irradiation for 12h. The exposure started at 6:00 and was stopped at 18:00.

### Investigation of the model reaction using water as alternative solvent

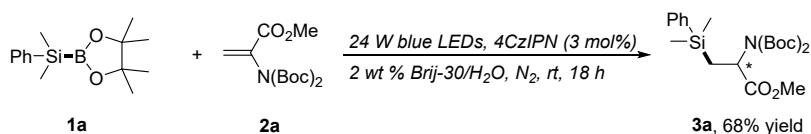

To a 25 mL Schlenk tube equipped with a magnetic stir bar was added the 4CzIPN (4.7 mg, 0.006 mmol). After that, aqueous solution of 2 wt % Brij-30 (2 mL), **2a** (0.2 mmol), **1a** (0.3 mmol) and were added sequentially by means of syringe. The resulting solution was degassed for 15 min by bubbling  $\text{N}_2$  stream, then stirred at room temperature under the irradiation of 24 W blue LED for 18 hours. The solvent was removed on a rotary evaporator under reduced pressure and the crude product was purified by flash silica-gel column chromatography (PE/EA = 20 : 1) to give the products **3a** (60mg) as a colorless oil in 68% yield.

## NMR Spectra

$^1\text{H}$  NMR spectra of **3a** (400 MHz,  $\text{CDCl}_3$ )

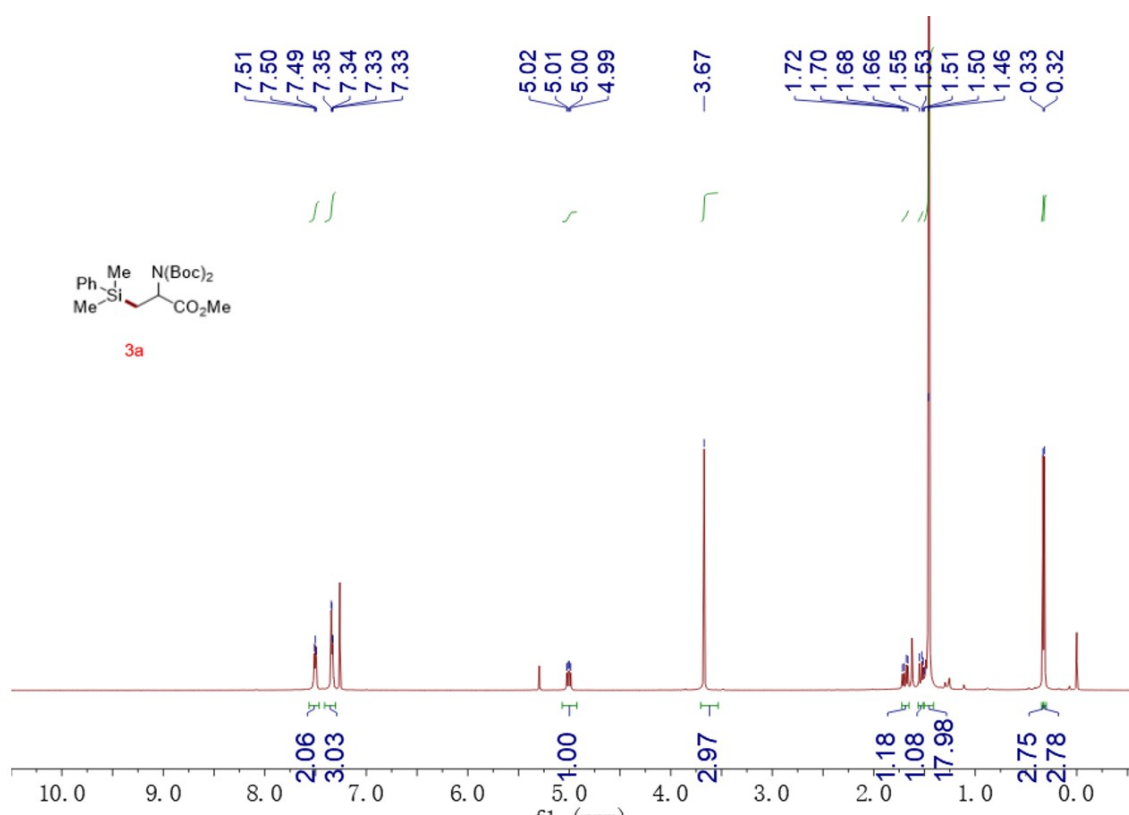

$^{13}\text{C}$  NMR spectra of **3a** (100 MHz,  $\text{CDCl}_3$ )

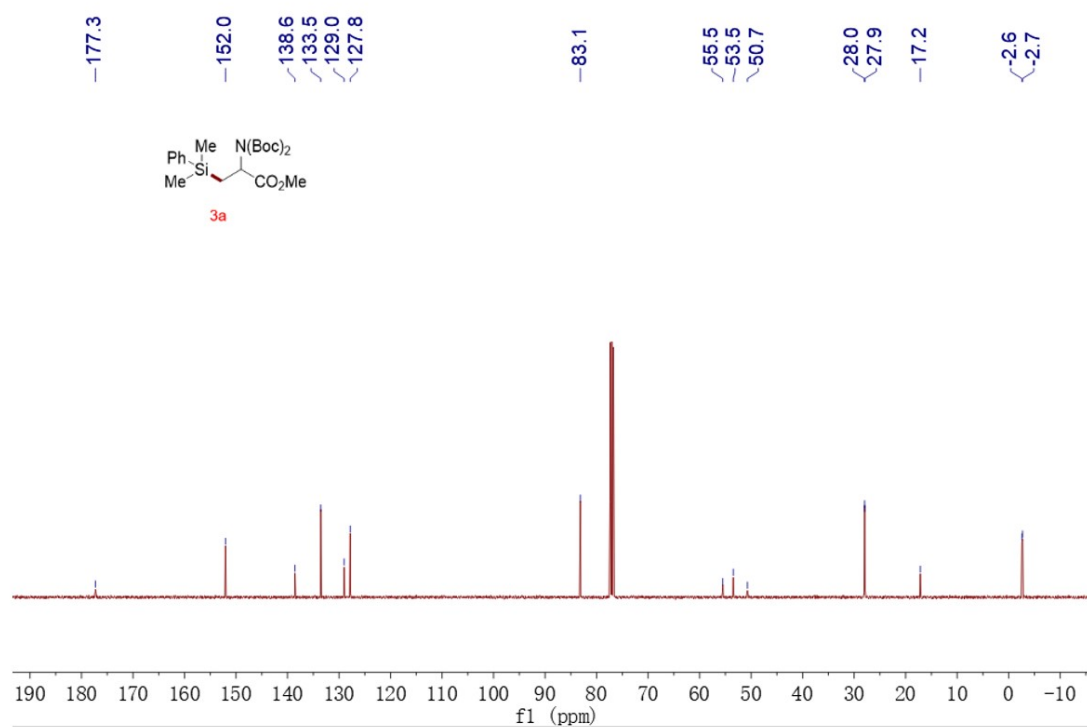

**<sup>1</sup>H NMR spectra of 3a' (400 MHz, CDCl<sub>3</sub>)**

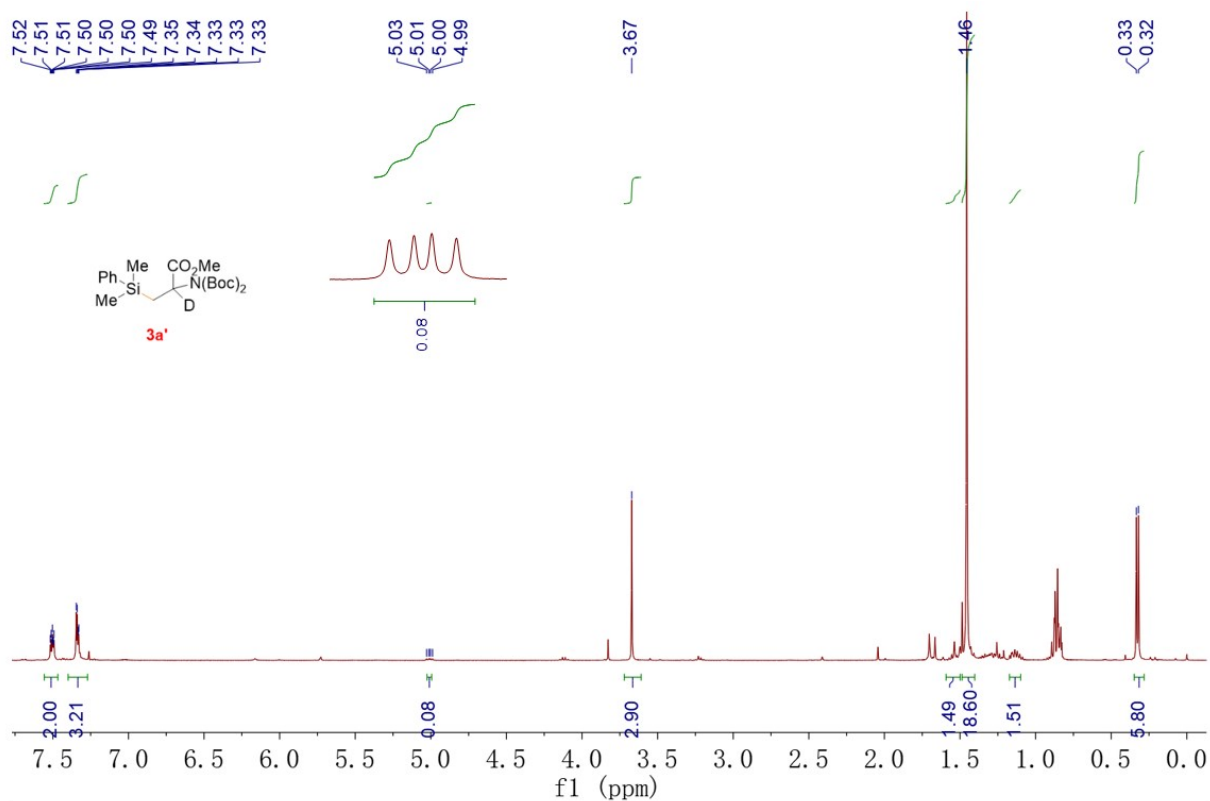

**$^1\text{H}$  NMR spectra of 3b (400 MHz,  $\text{CDCl}_3$ )**

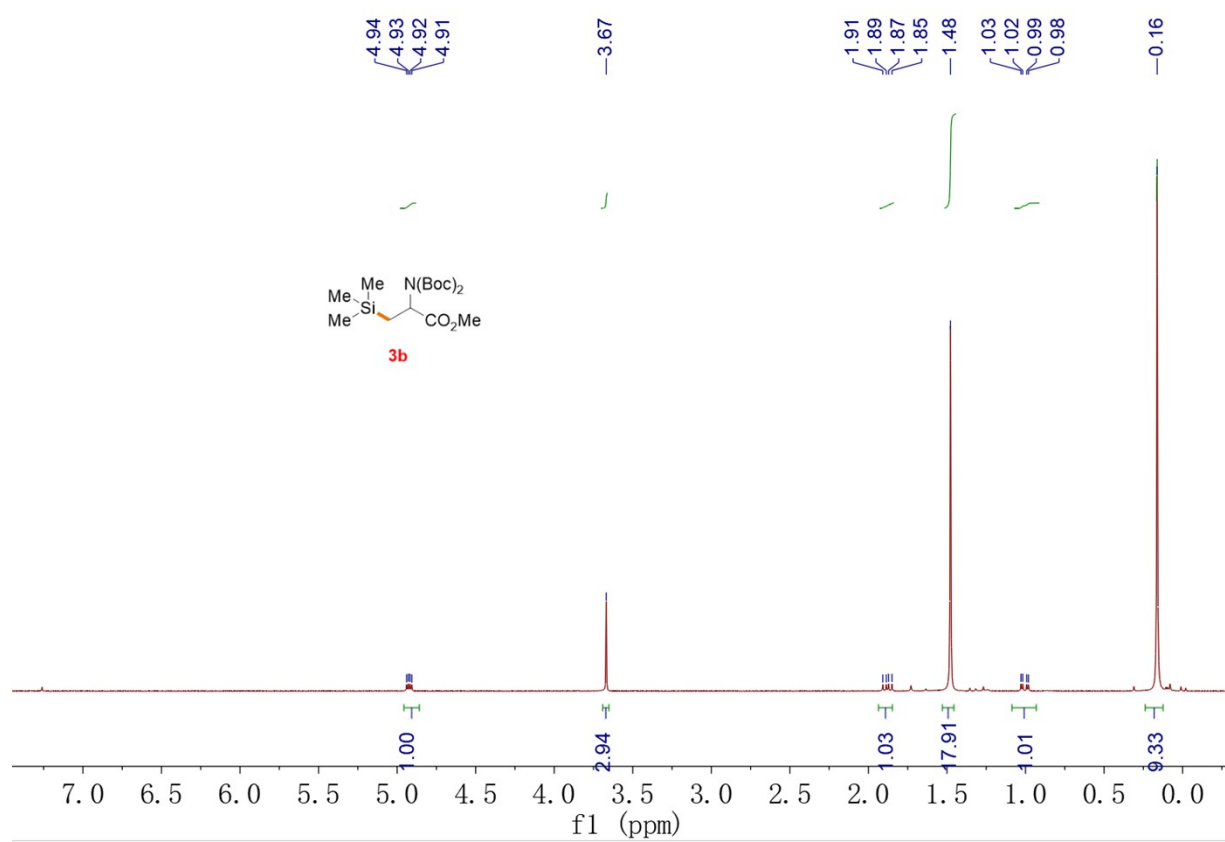

**$^{13}\text{C}$  NMR spectra of 3b (100 MHz,  $\text{CDCl}_3$ )**

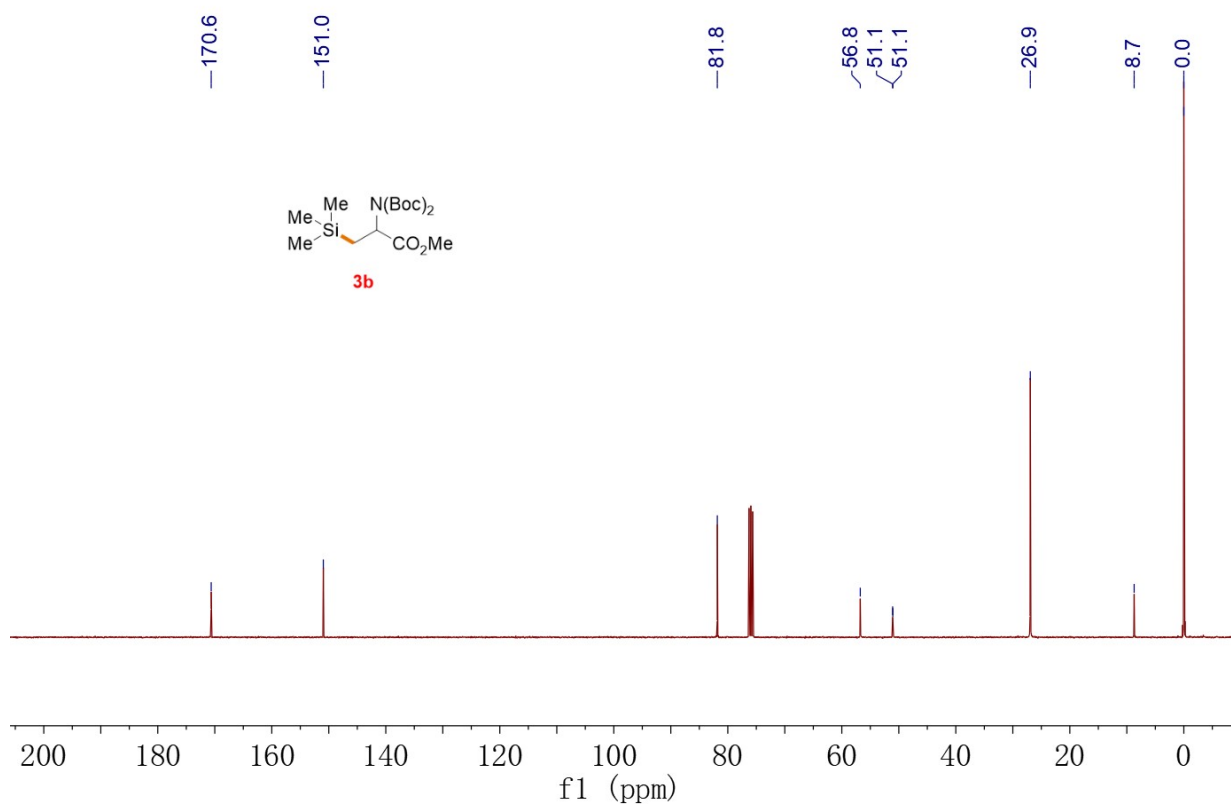

<sup>1</sup>H NMR spectra of **3c** (400 MHz, CDCl<sub>3</sub>)

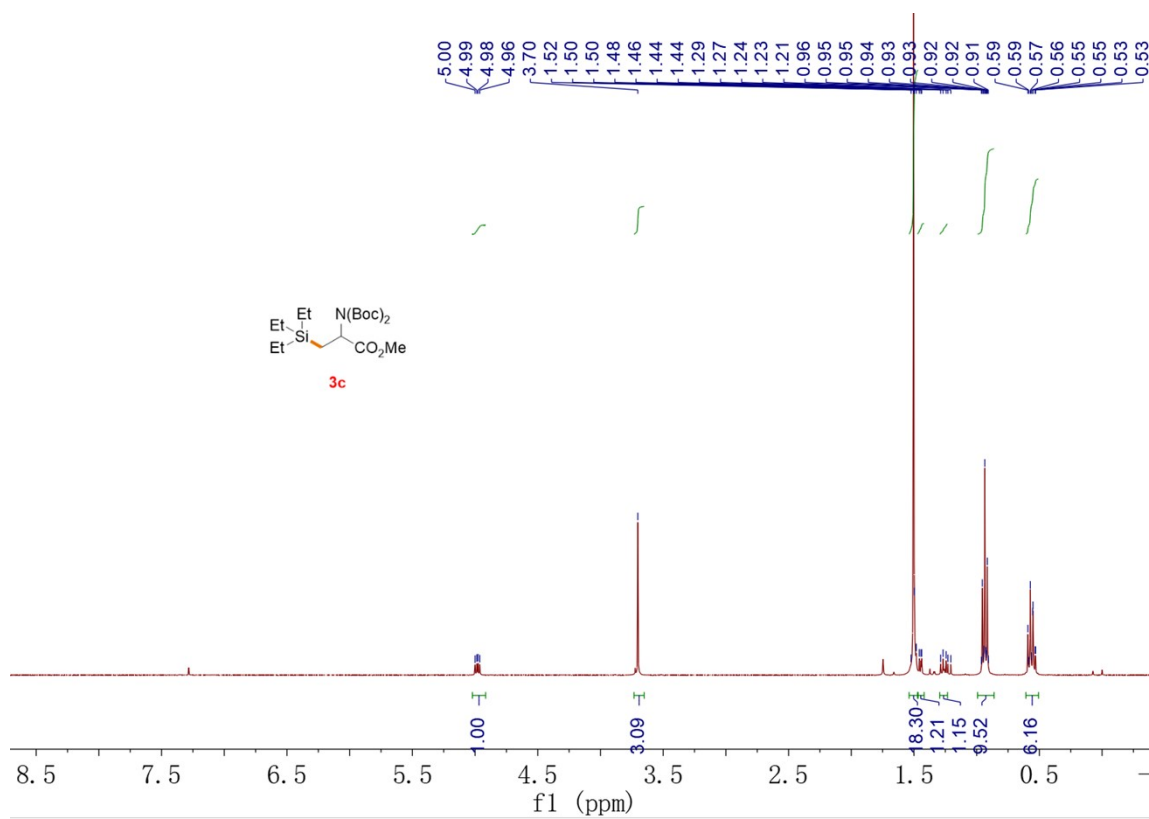

<sup>13</sup>C NMR spectra of **3c** (100 MHz, CDCl<sub>3</sub>)

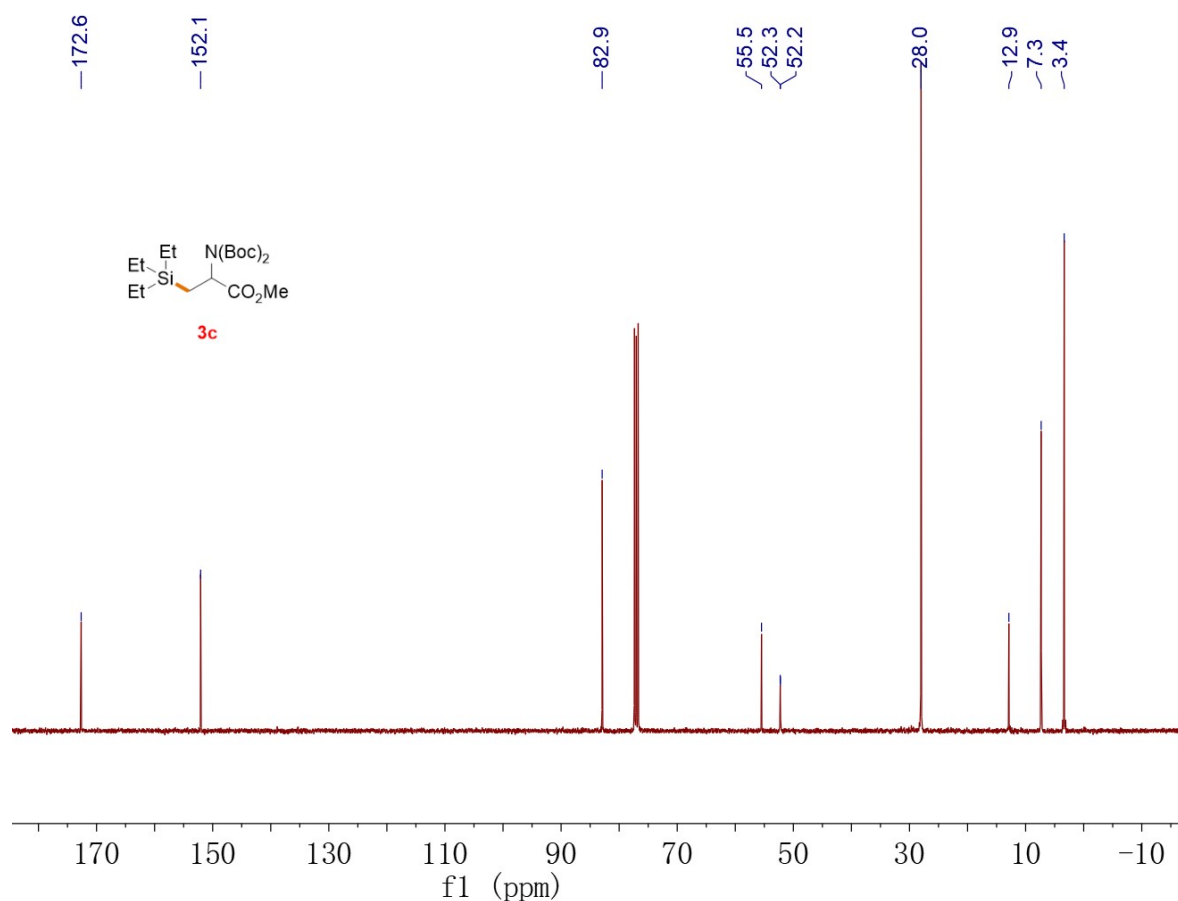

<sup>1</sup>H NMR spectra of **3d** (400 MHz, CDCl<sub>3</sub>)

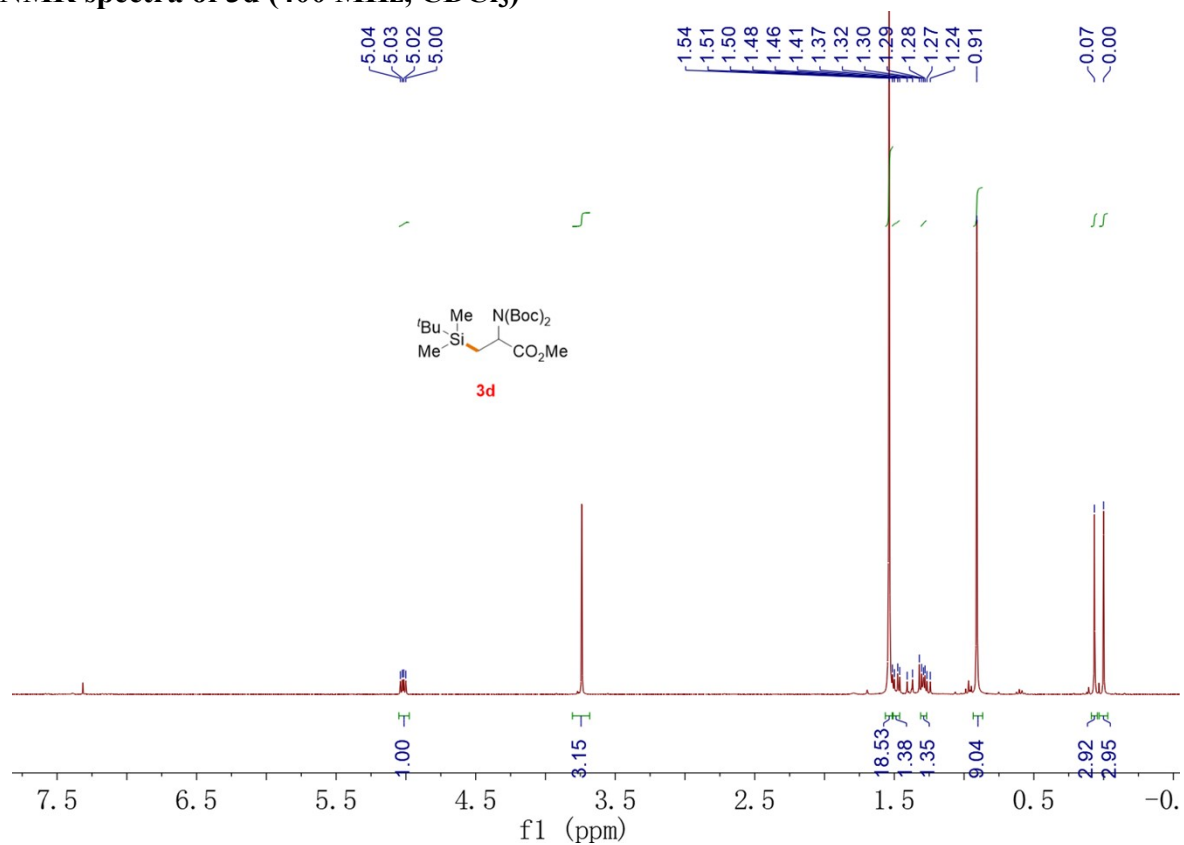

**$^{13}\text{C}$  NMR spectra of 3d (100 MHz,  $\text{CDCl}_3$ )**

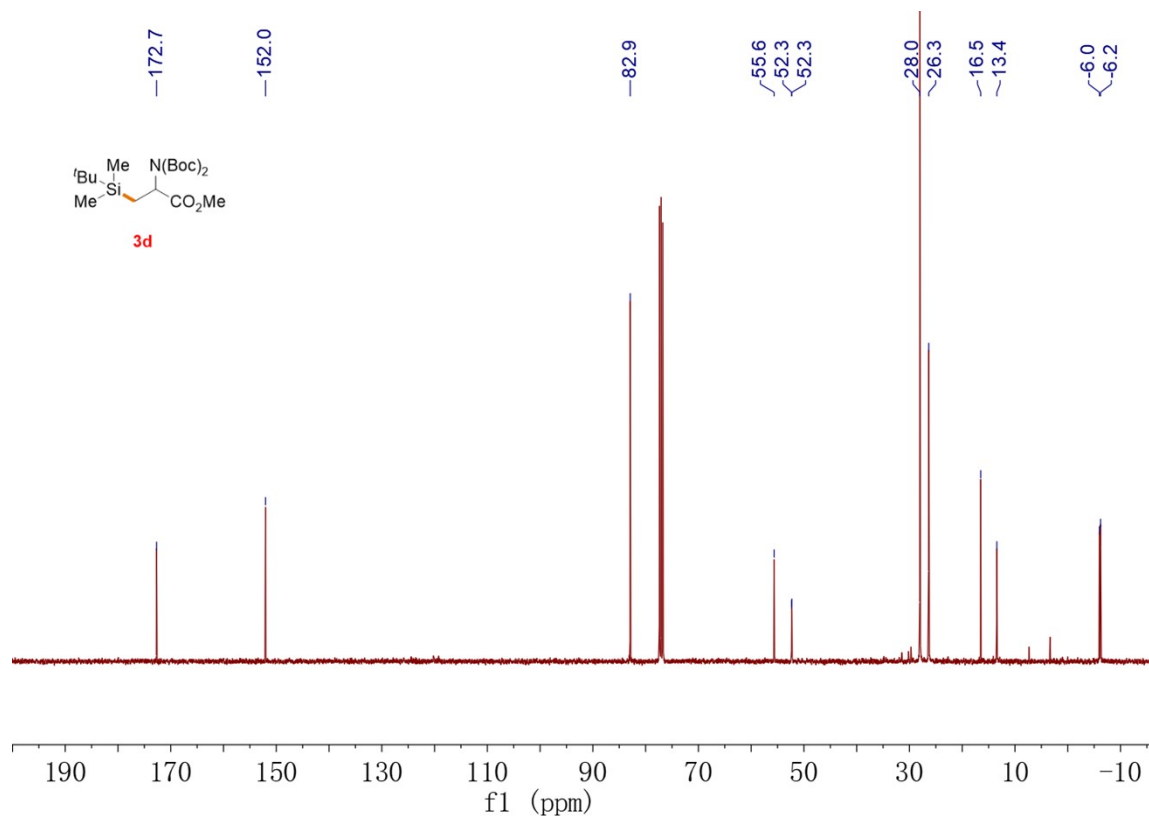

**$^1\text{H}$  NMR spectra of 3e (400 MHz,  $\text{CDCl}_3$ )**

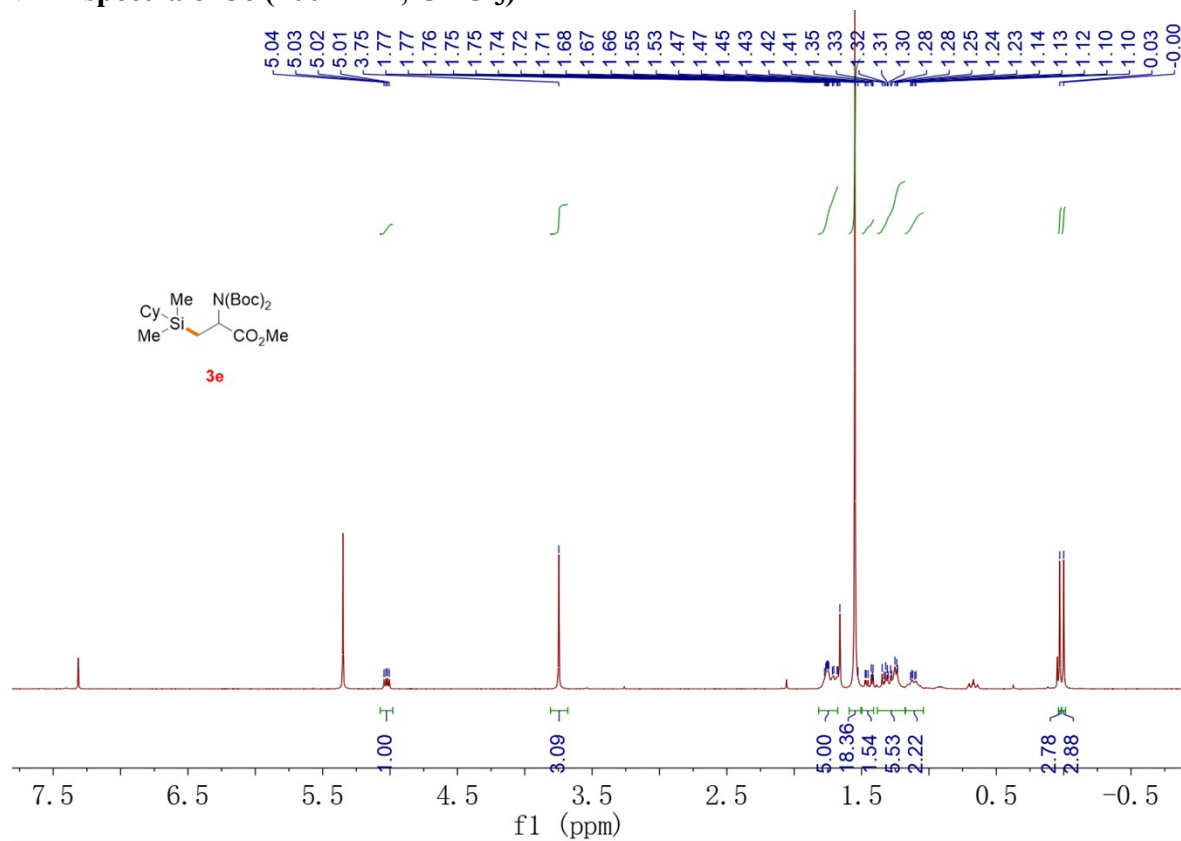

**$^{13}\text{C}$  NMR spectra of 3e (100 MHz,  $\text{CDCl}_3$ )**

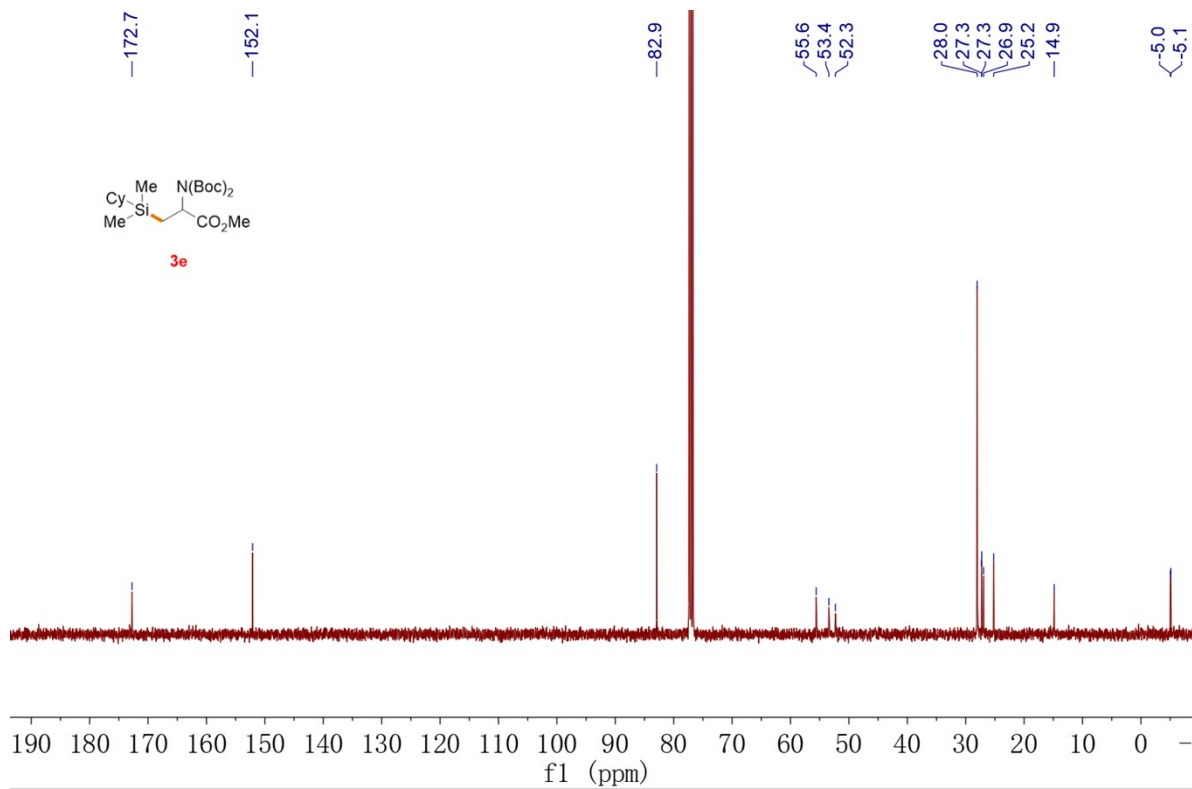

**<sup>1</sup>H NMR spectra of 3f (400 MHz, CDCl<sub>3</sub>)**

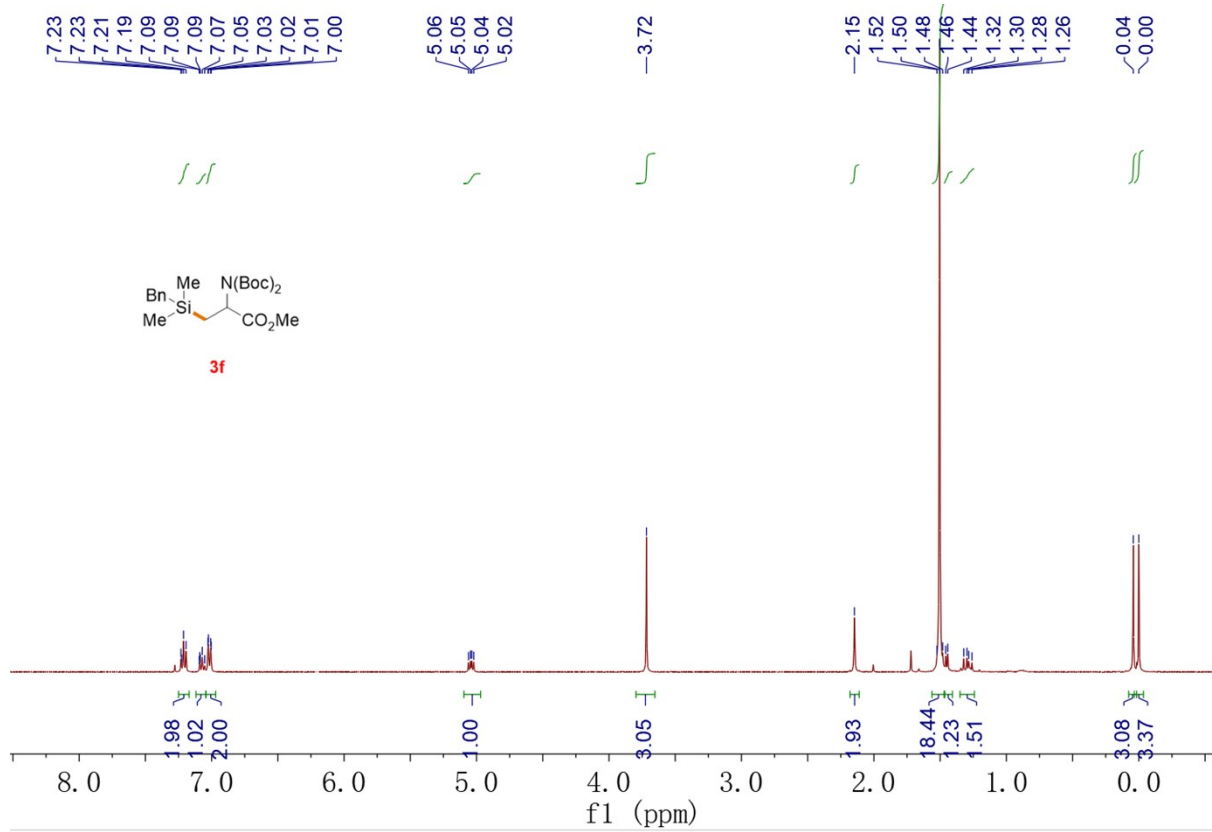

**$^{13}\text{C}$  NMR spectra of 3f (100 MHz,  $\text{CDCl}_3$ )**

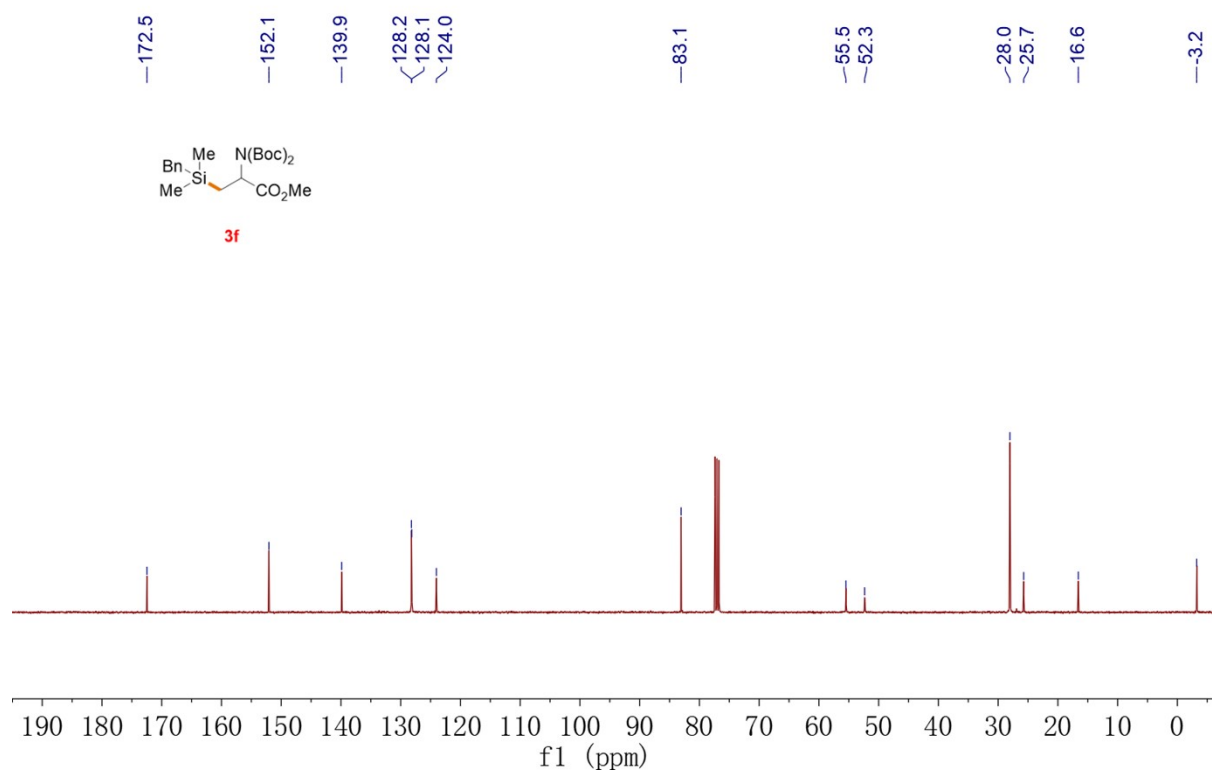

**$^1\text{H}$  NMR spectra of 4a (400 MHz,  $\text{CDCl}_3$ )**

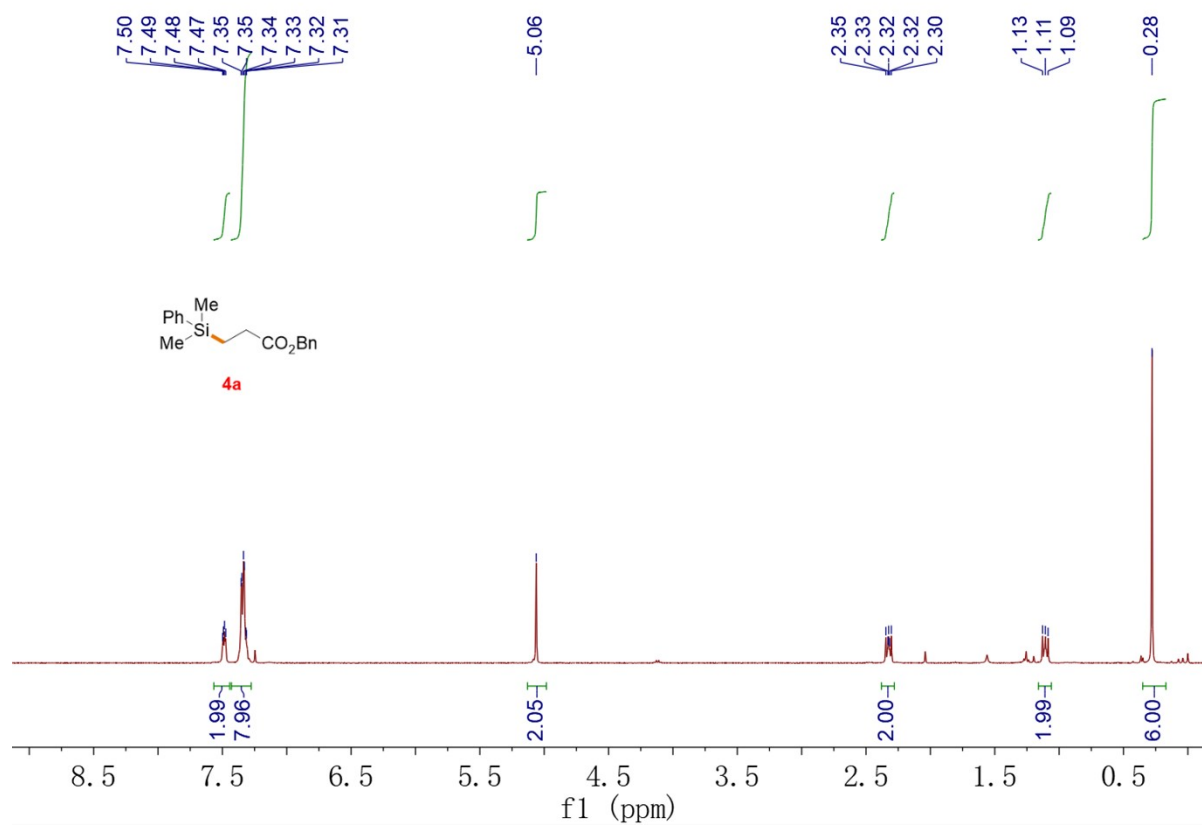

**$^{13}\text{C}$  NMR spectra of 4a (100 MHz,  $\text{CDCl}_3$ )**

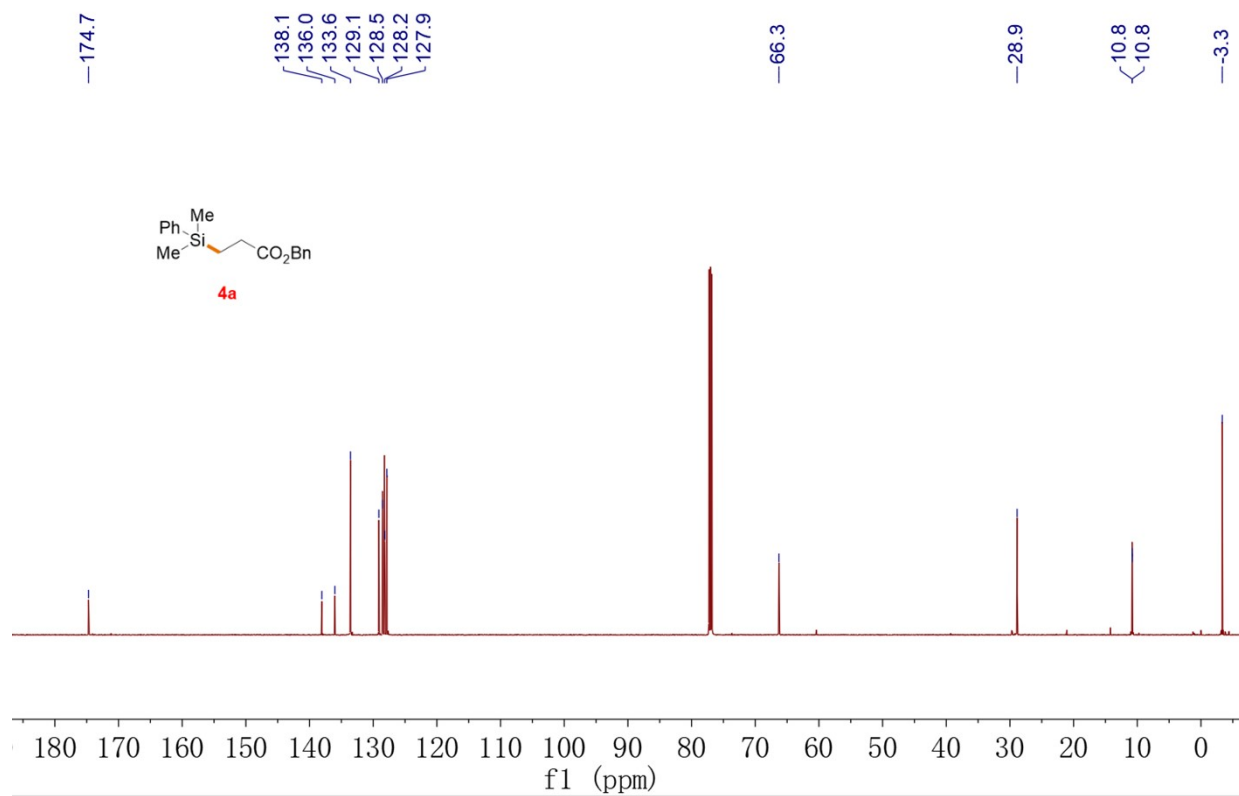

**$^1\text{H}$  NMR spectra of 4b (400 MHz,  $\text{CDCl}_3$ )**

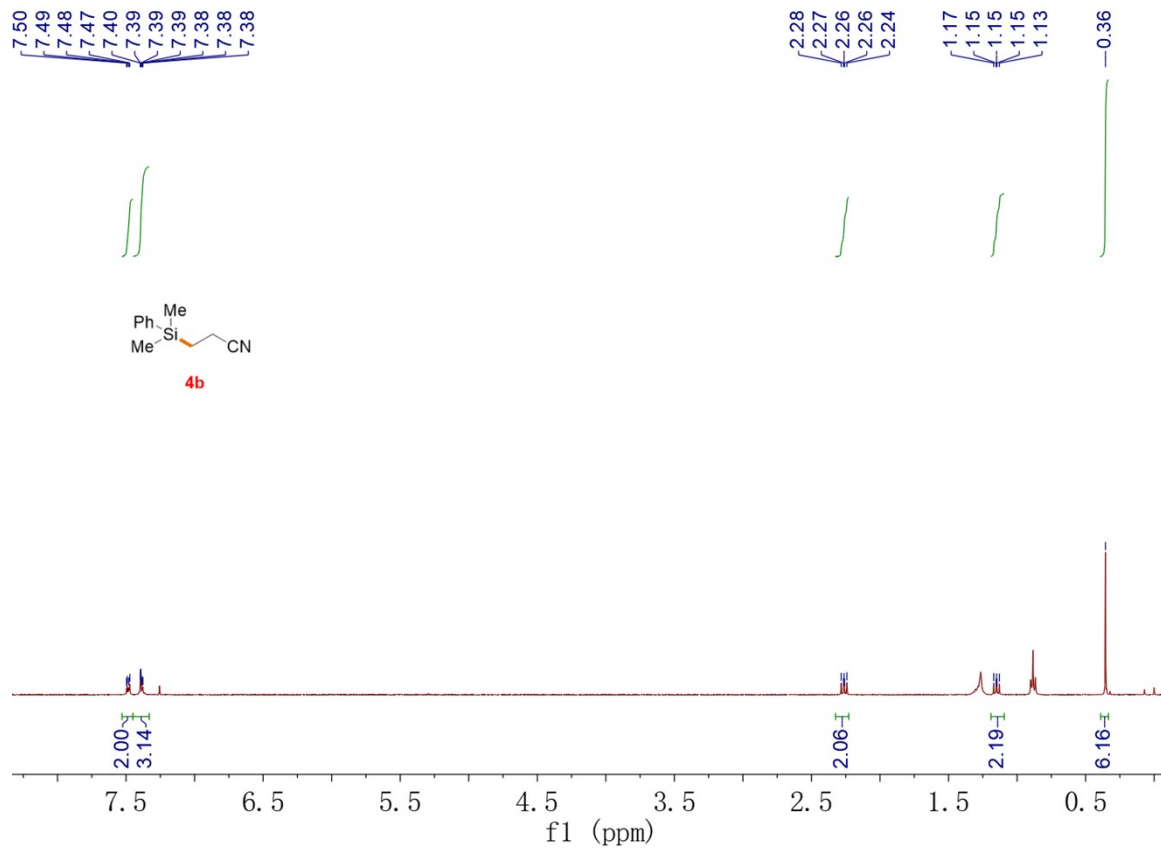

**$^{13}\text{C}$  NMR spectra of 4b (100 MHz,  $\text{CDCl}_3$ )**

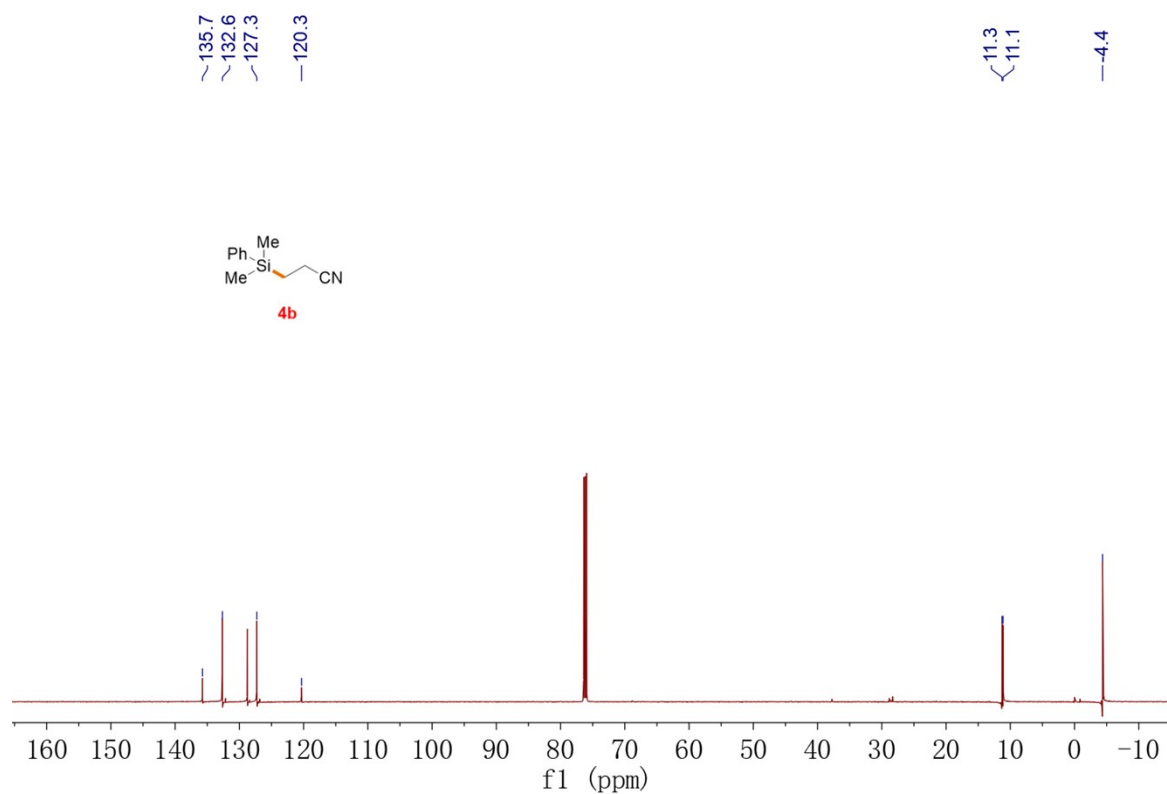

**$^1\text{H}$  NMR spectra of 4c (400 MHz,  $\text{CDCl}_3$ )**

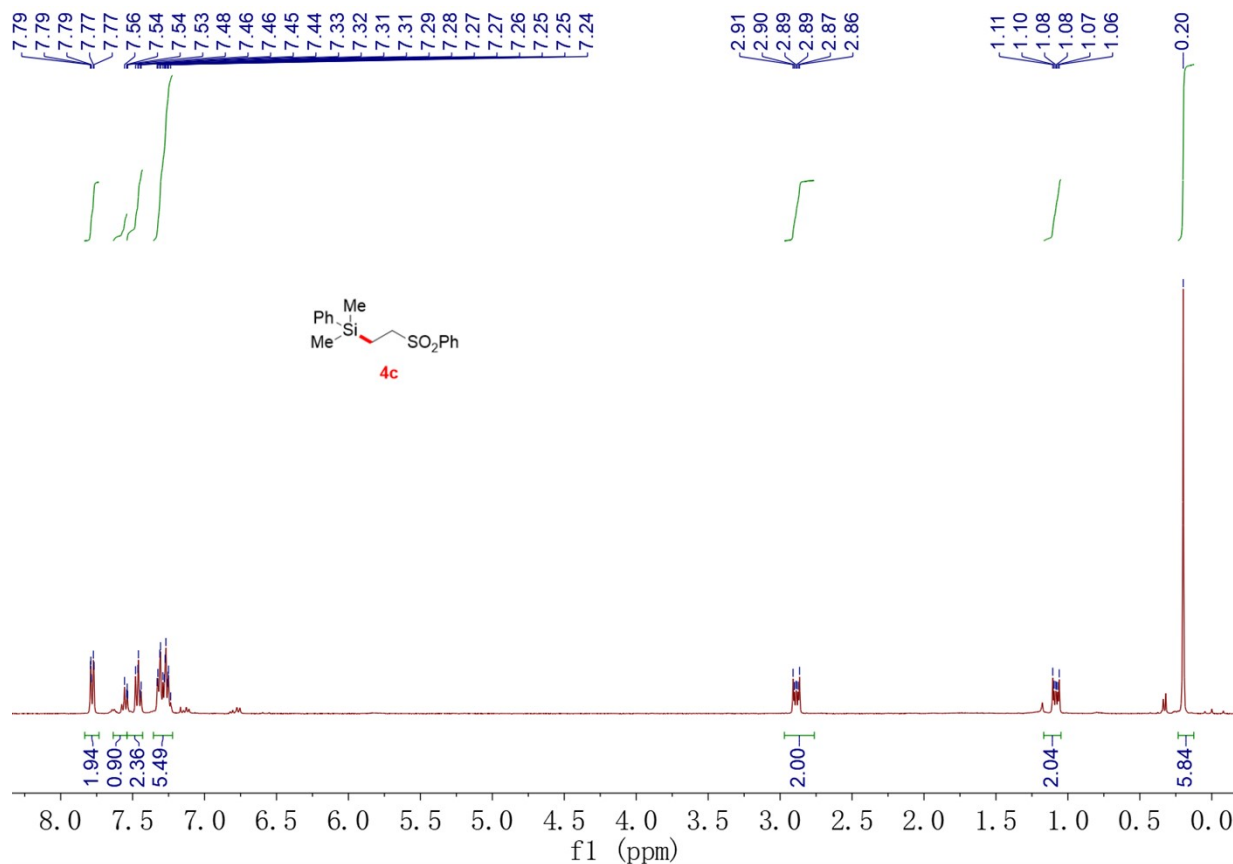

**$^{13}\text{C}$  NMR spectra of 4c (100 MHz,  $\text{CDCl}_3$ )**

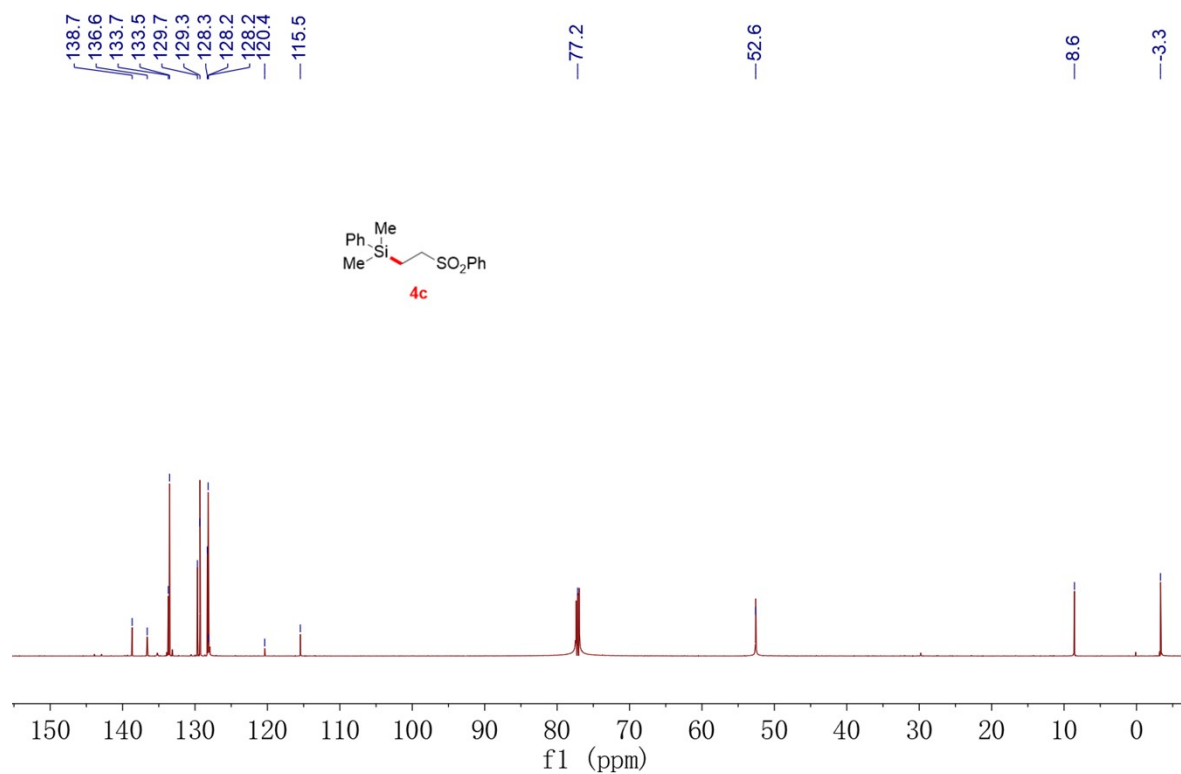

**$^1\text{H}$  NMR spectra of 4d (400 MHz,  $\text{CDCl}_3$ )**

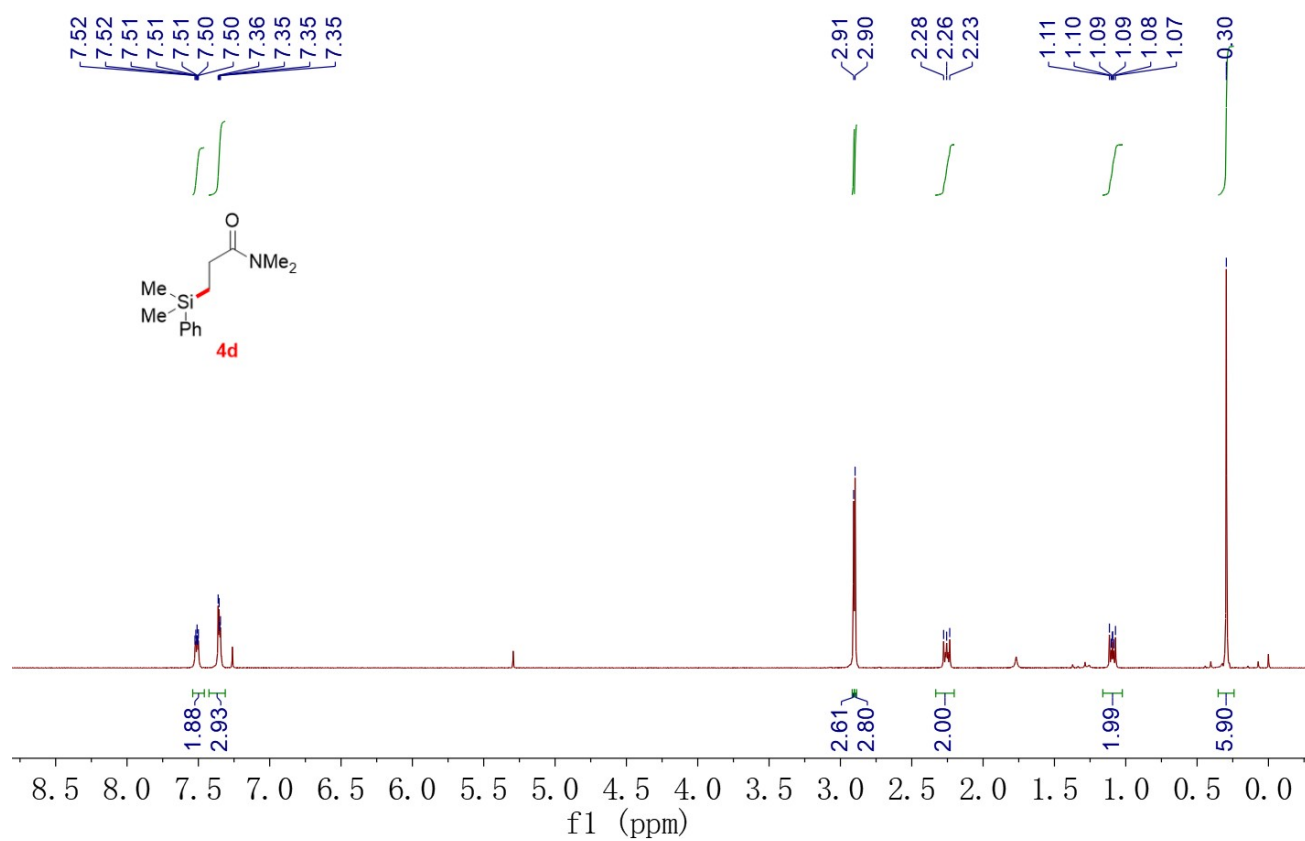

**$^{13}\text{C}$  NMR spectra of 4d (100 MHz,  $\text{CDCl}_3$ )**

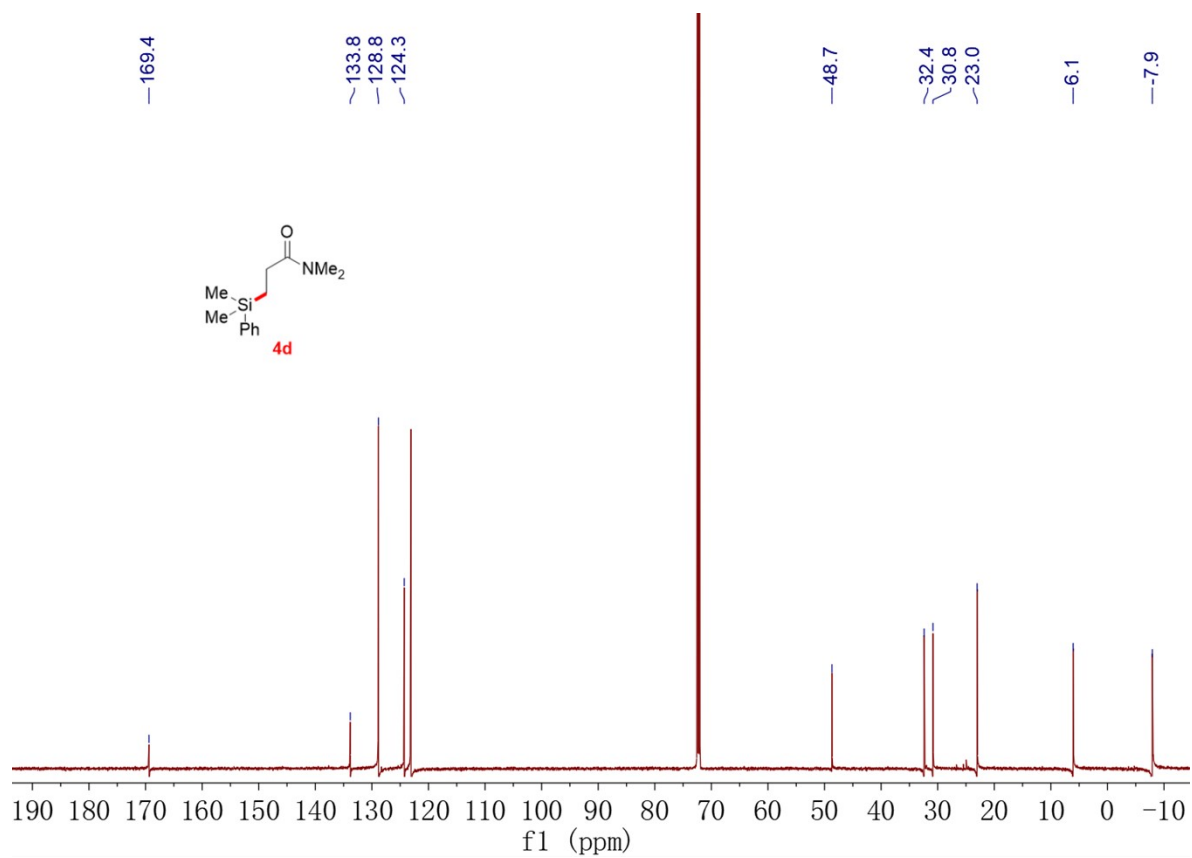

**$^1\text{H}$  NMR spectra of 4e (400 MHz,  $\text{CDCl}_3$ )**

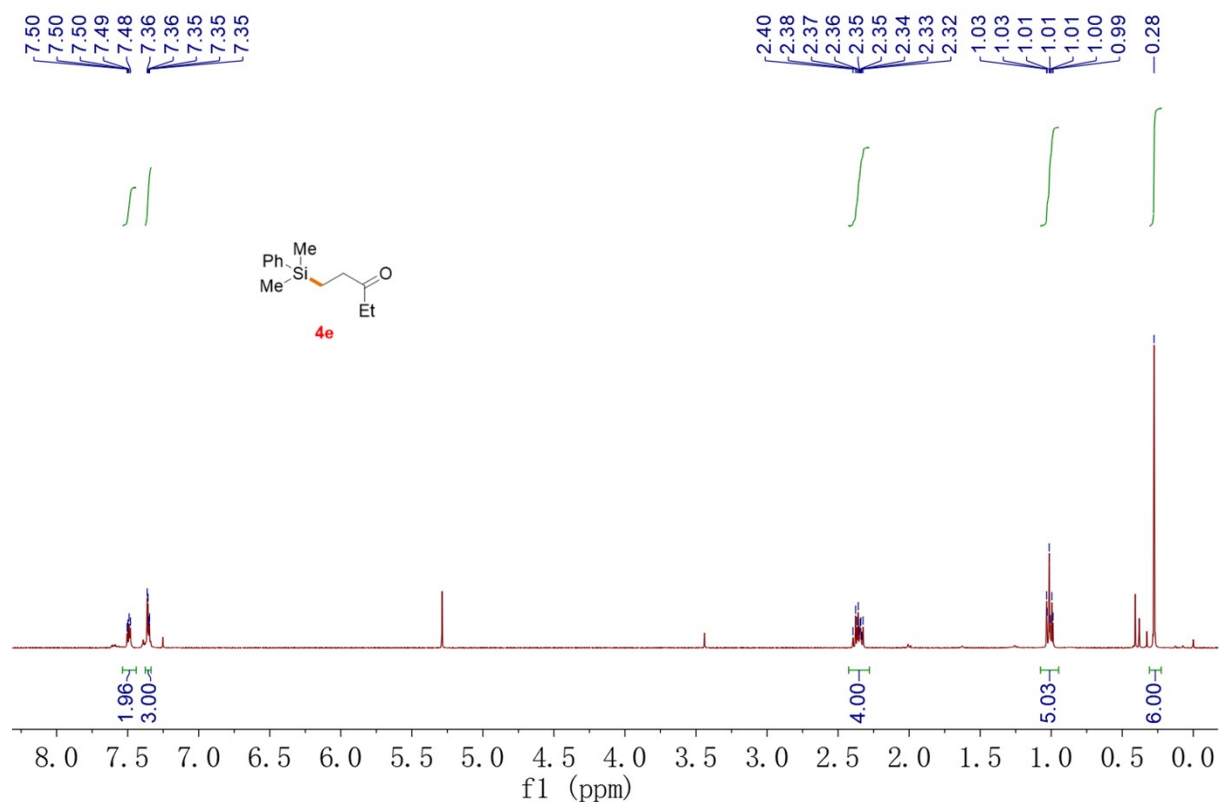

**$^{13}\text{C}$  NMR spectra of 4e (100 MHz,  $\text{CDCl}_3$ )**

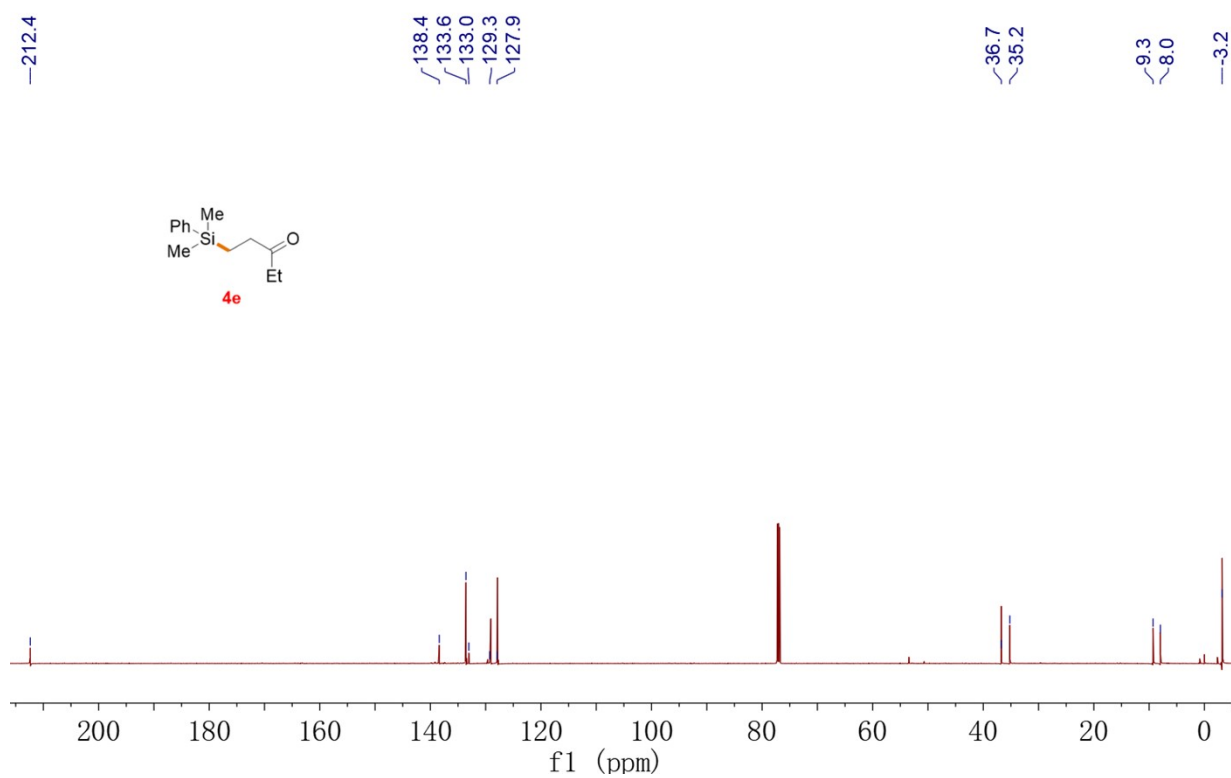

**$^1\text{H}$  NMR spectra of 4f (400 MHz,  $\text{CDCl}_3$ )**

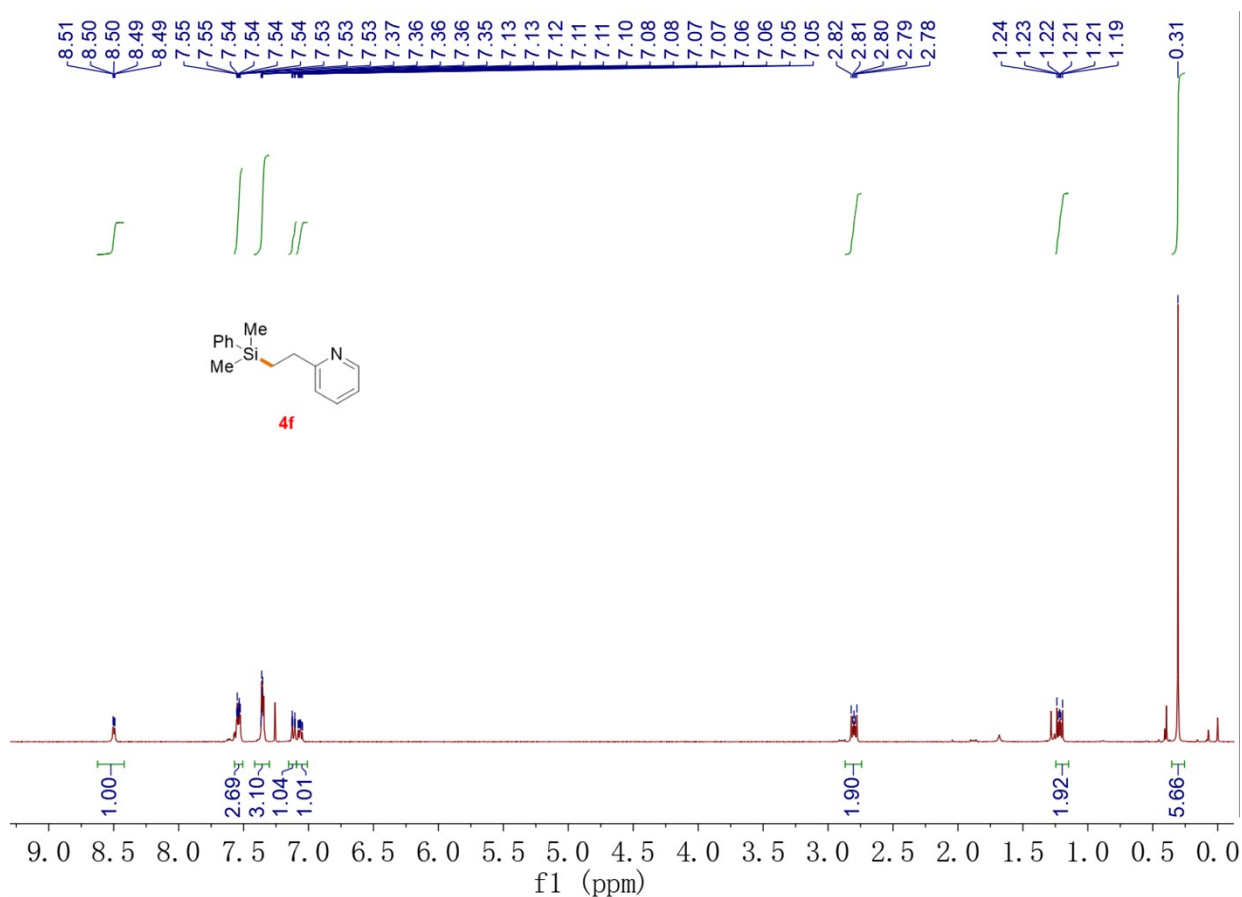

**<sup>13</sup>C NMR spectra of 4f (100 MHz, CDCl<sub>3</sub>)**

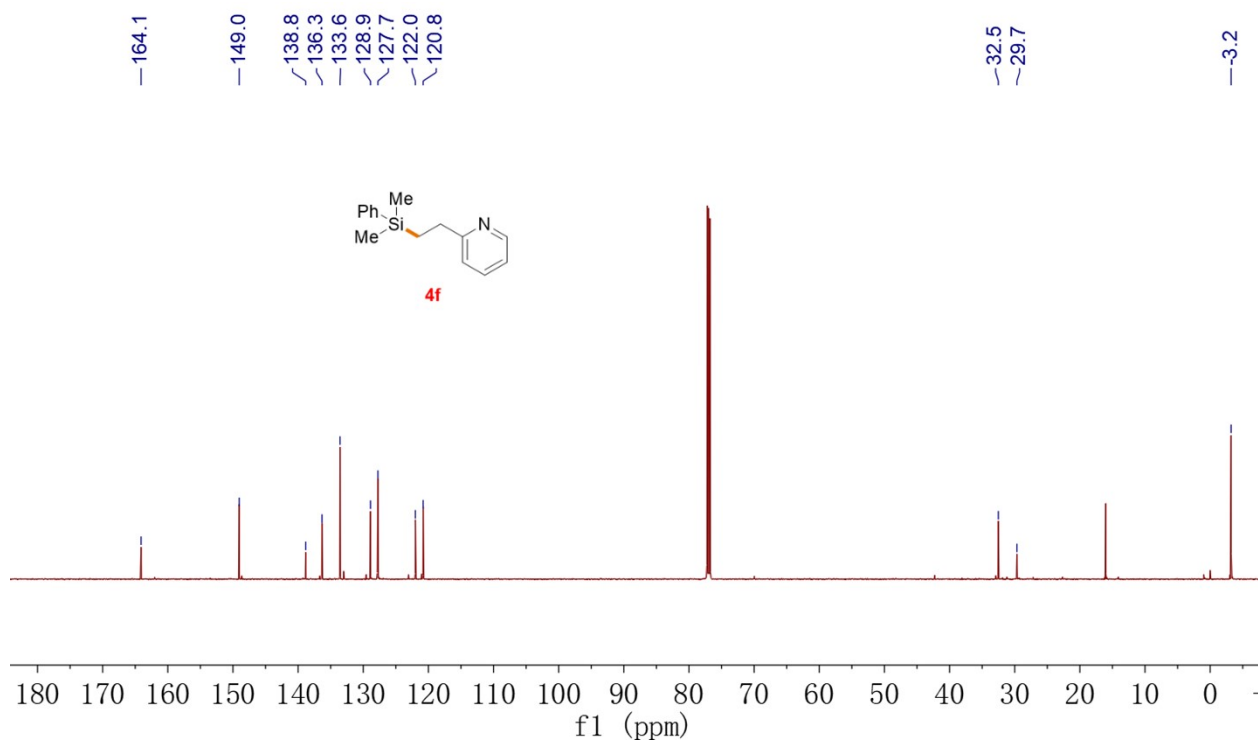

**<sup>1</sup>H NMR spectra of 4g (400 MHz, CDCl<sub>3</sub>)**

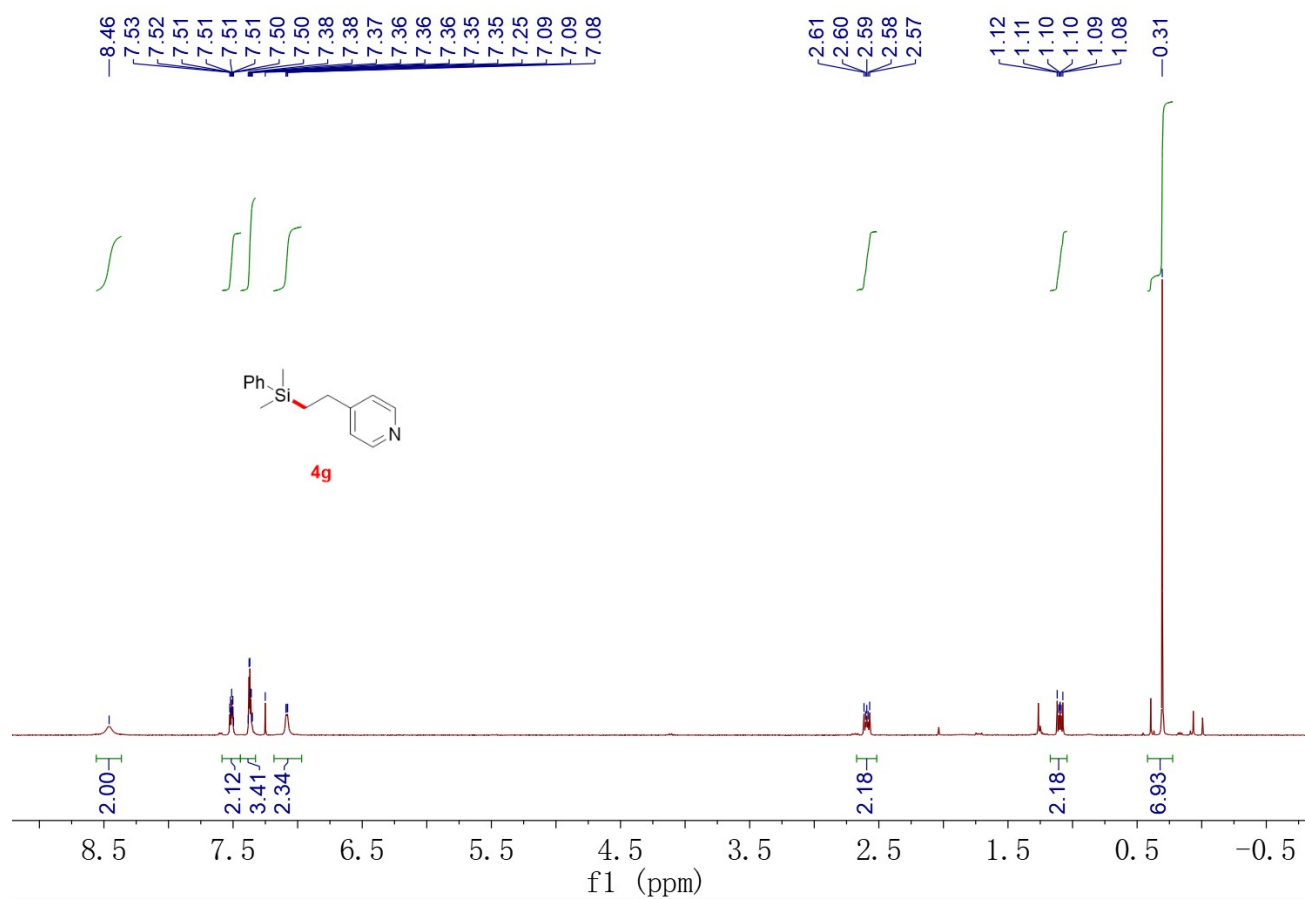

**<sup>13</sup>C NMR spectra of 4g (100 MHz, CDCl<sub>3</sub>)**

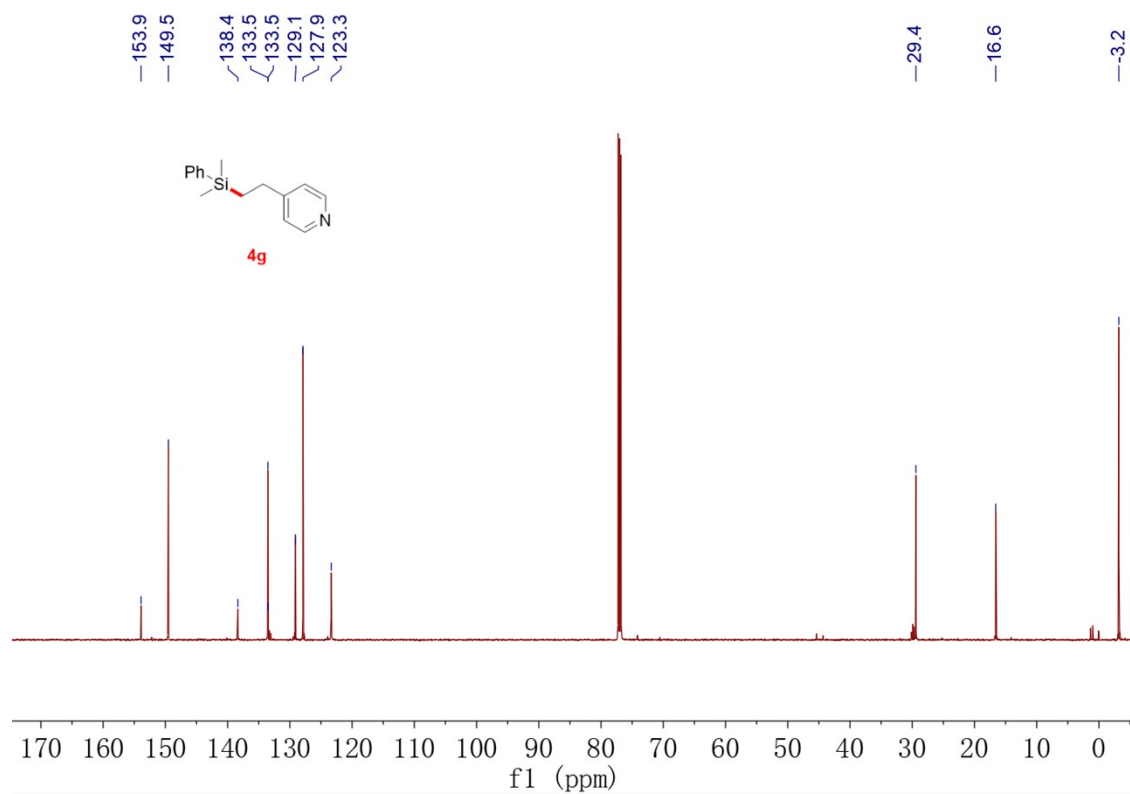

**<sup>1</sup>H NMR spectra of 4h (400 MHz, CDCl<sub>3</sub>)**

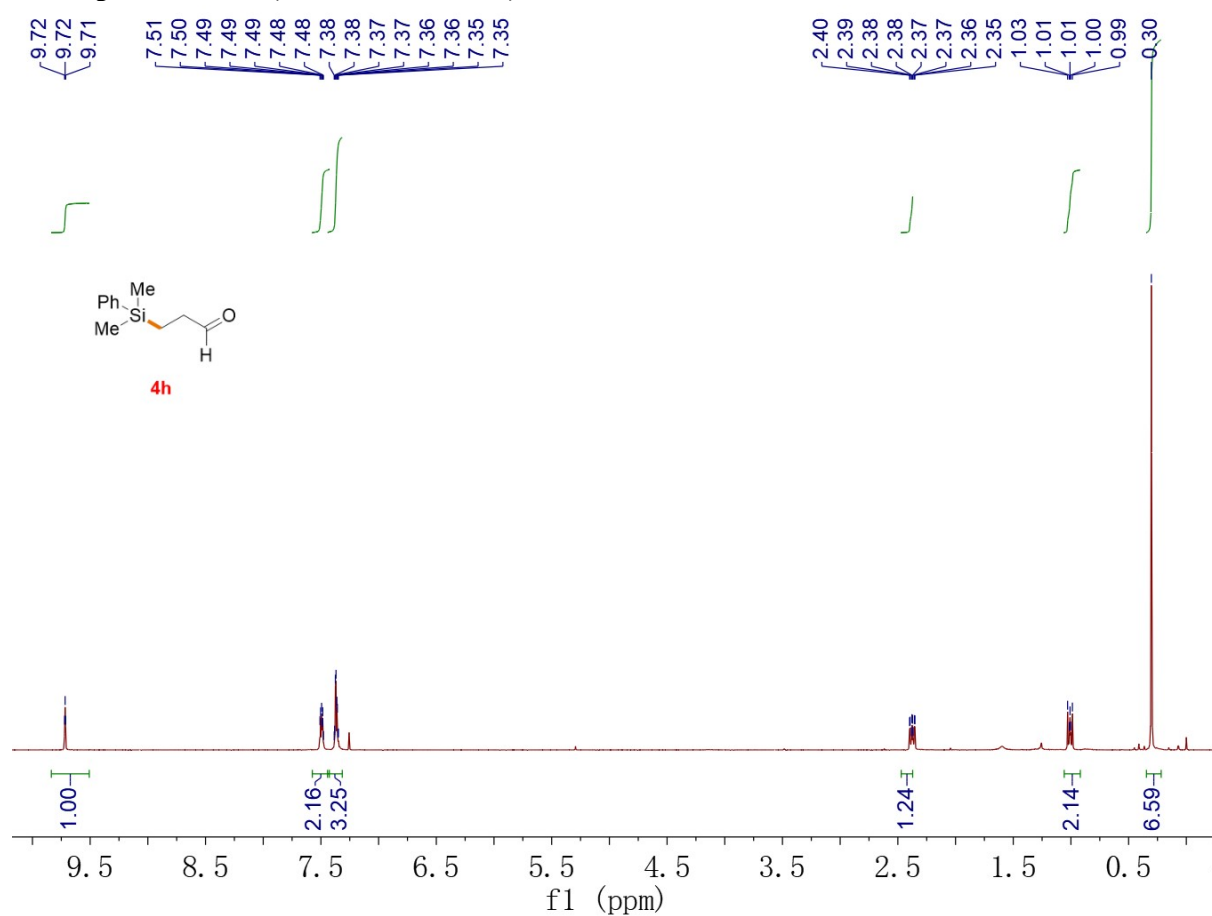

**<sup>13</sup>C NMR spectra of 4h (100 MHz, CDCl<sub>3</sub>)**

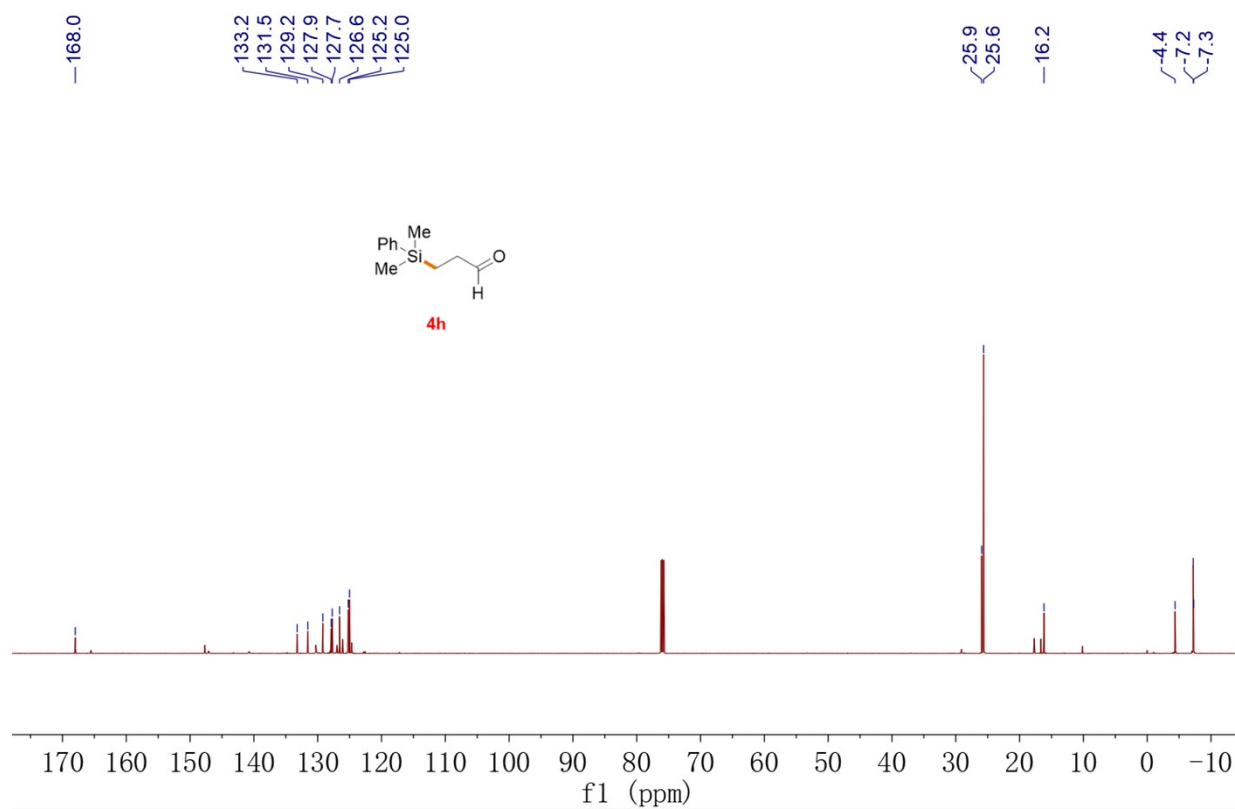

**<sup>1</sup>H NMR spectra of 4i (400 MHz, CDCl<sub>3</sub>)**

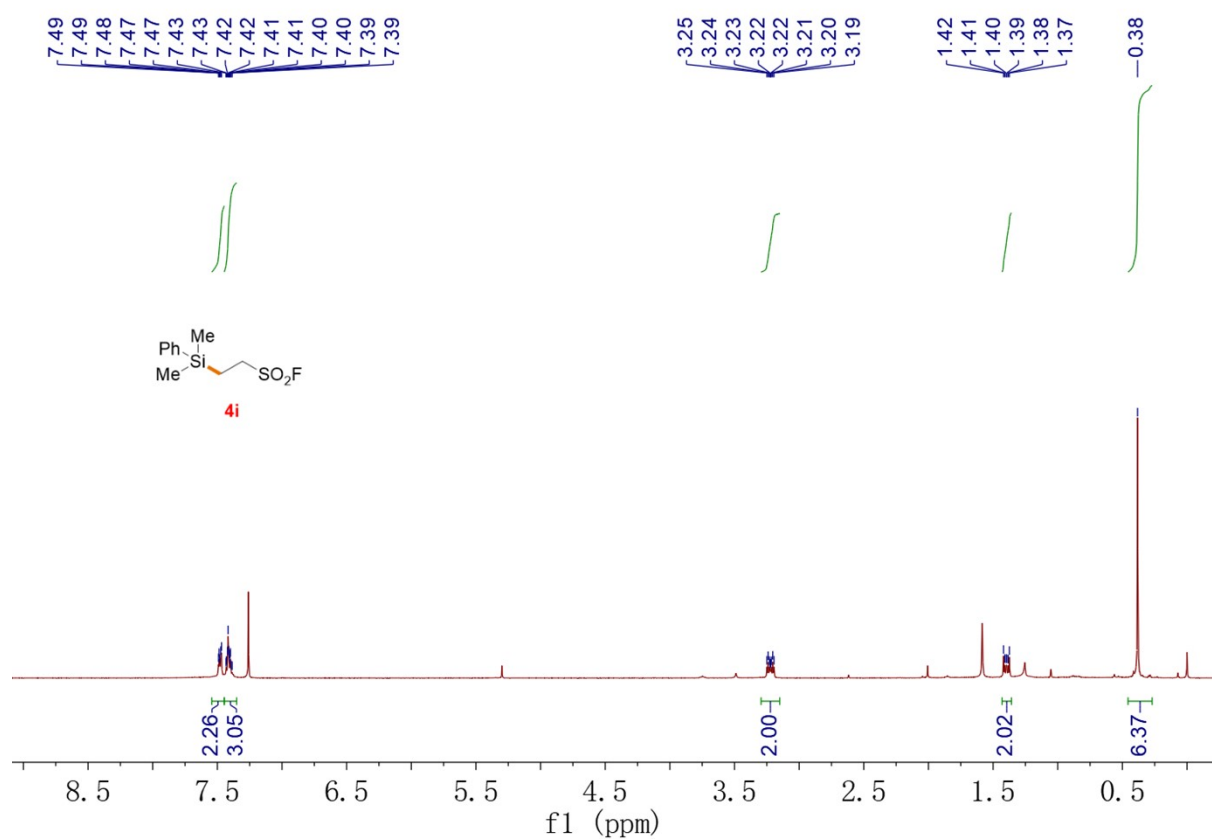

**<sup>13</sup>C NMR spectra of 4i (100 MHz, CDCl<sub>3</sub>)**

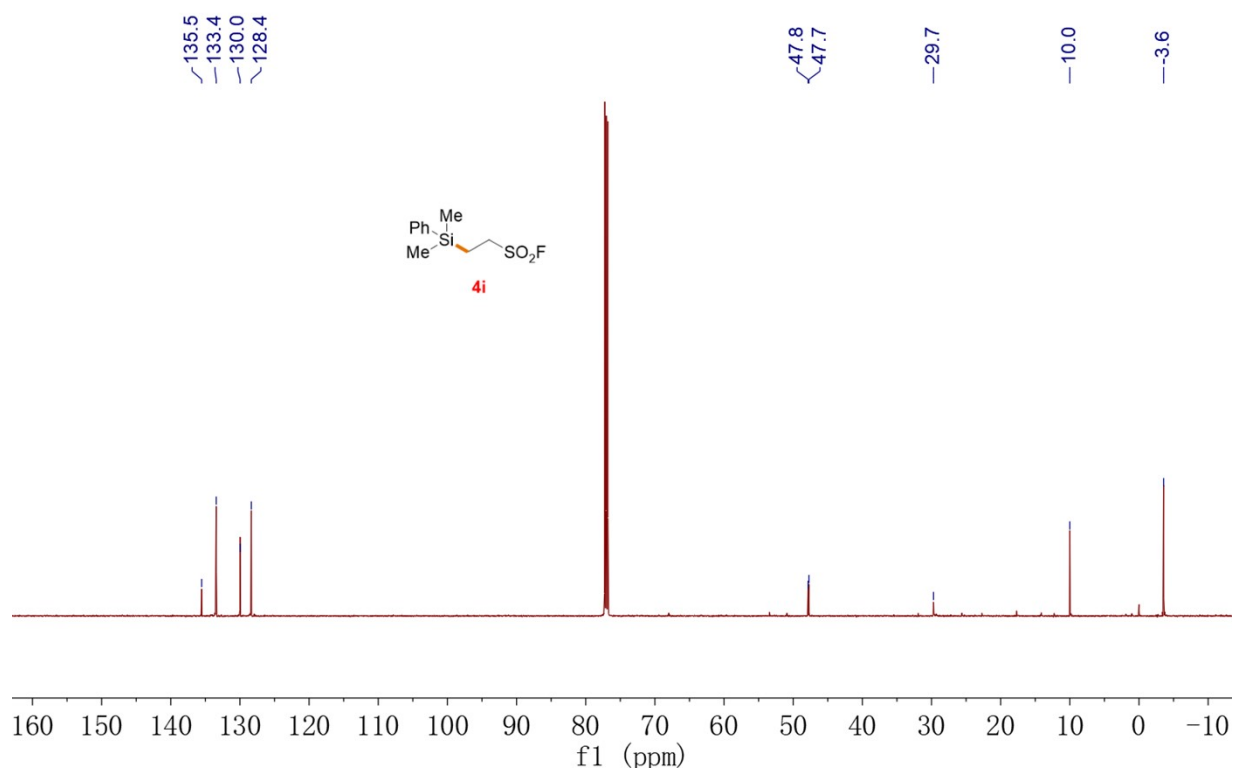

**<sup>1</sup>H NMR spectra of 4j (400 MHz, CDCl<sub>3</sub>)**

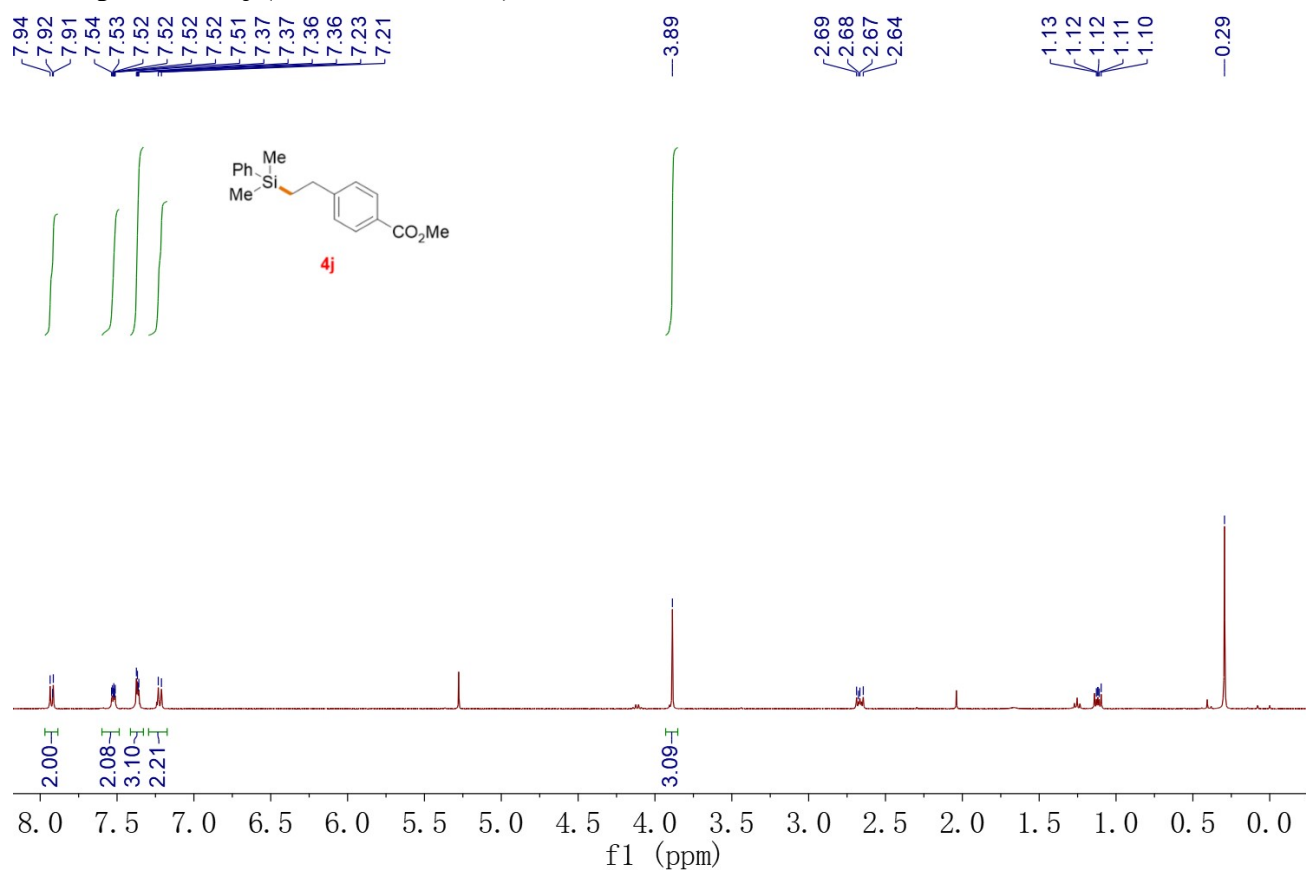

**<sup>13</sup>C NMR spectra of 4j (100 MHz, CDCl<sub>3</sub>)**

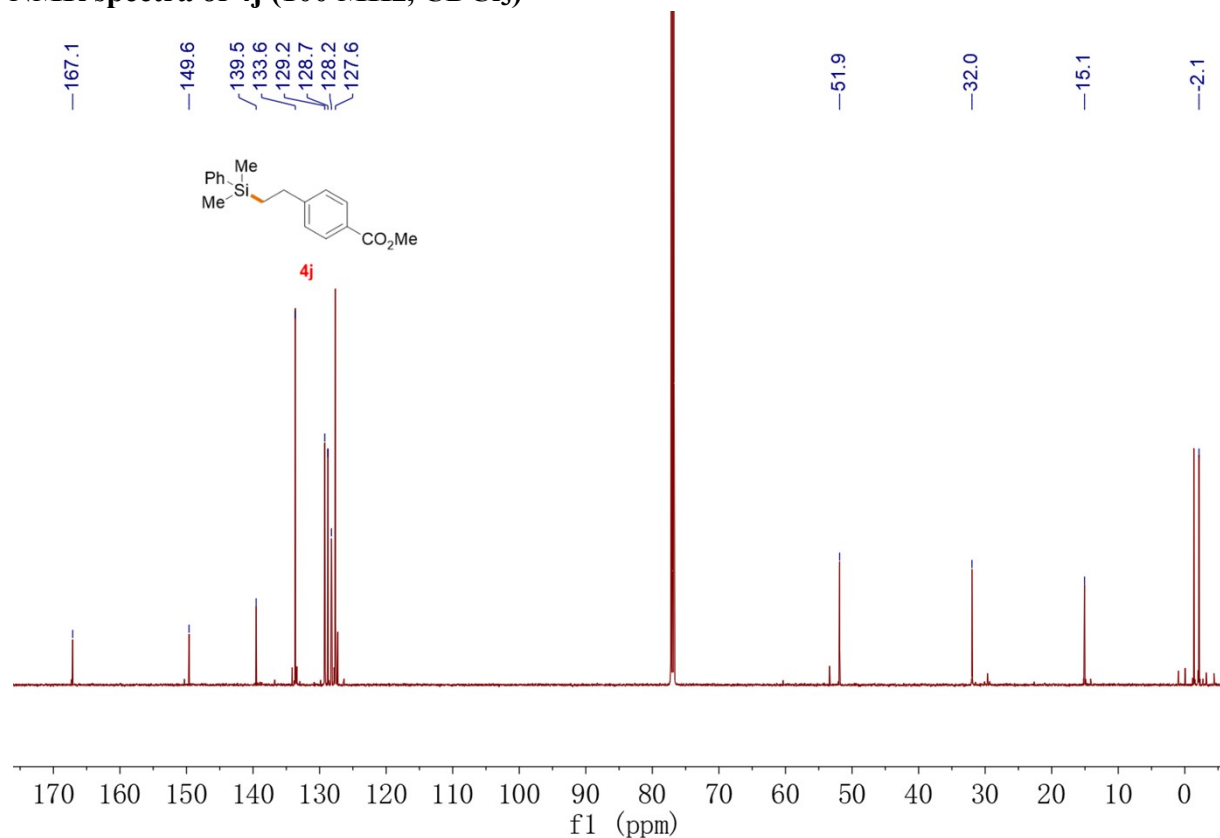

**<sup>1</sup>H NMR spectra of 4k (400 MHz, CDCl<sub>3</sub>)**

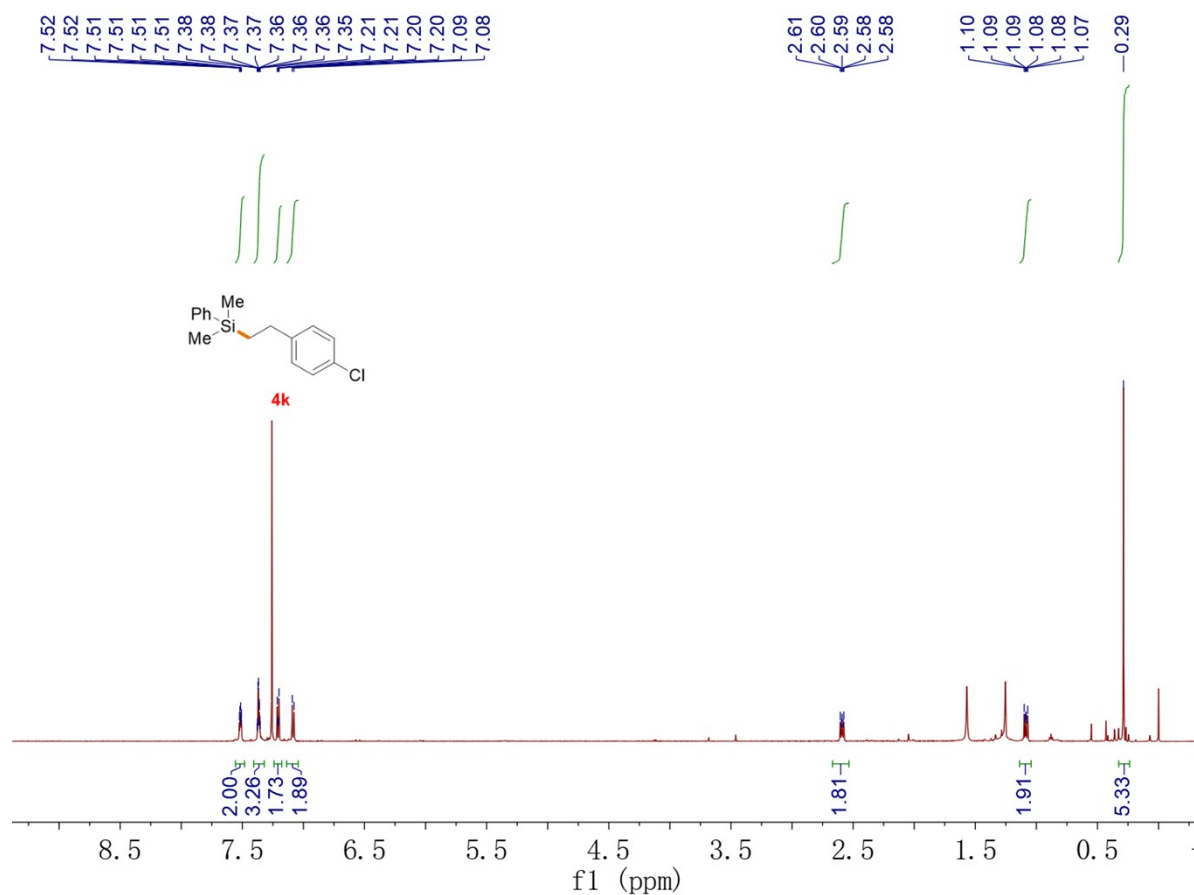

**<sup>13</sup>C NMR spectra of 4k (100 MHz, CDCl<sub>3</sub>)**

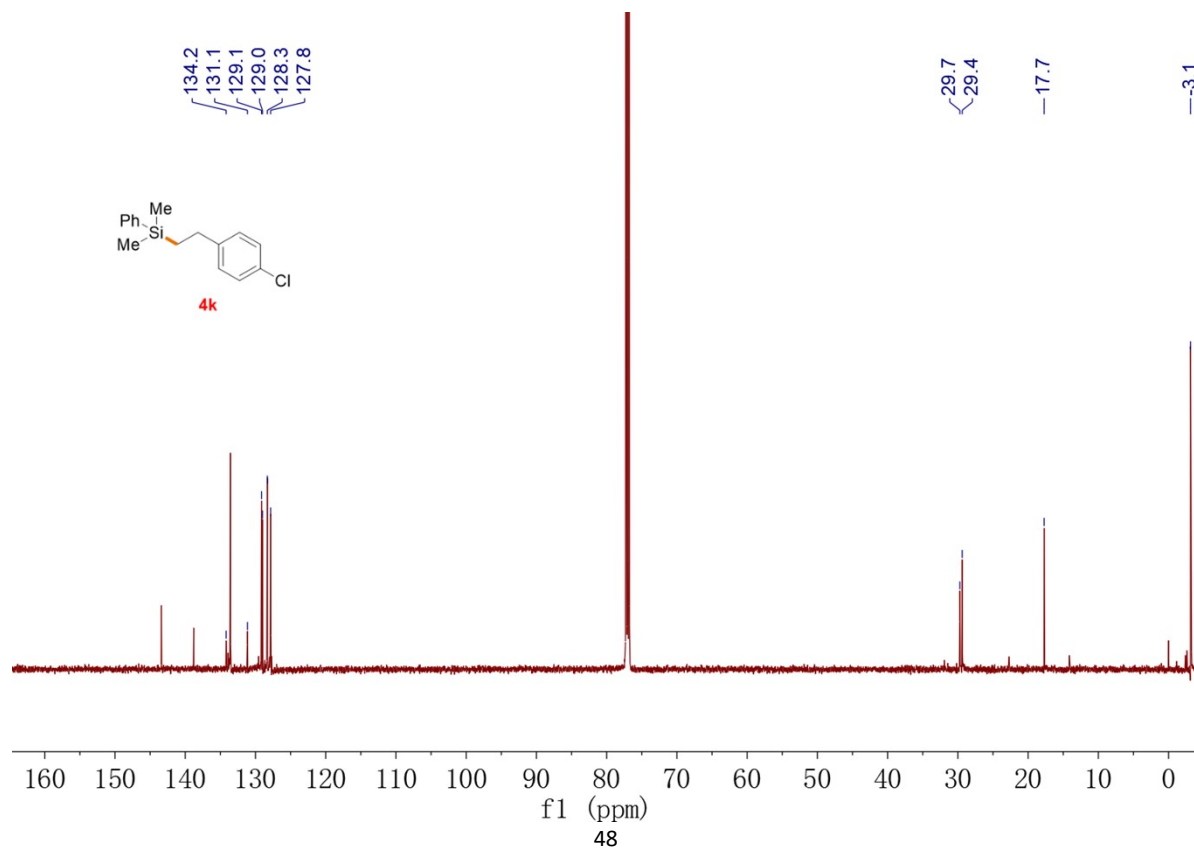

**<sup>1</sup>H NMR spectra of 4l (400 MHz, CDCl<sub>3</sub>)**

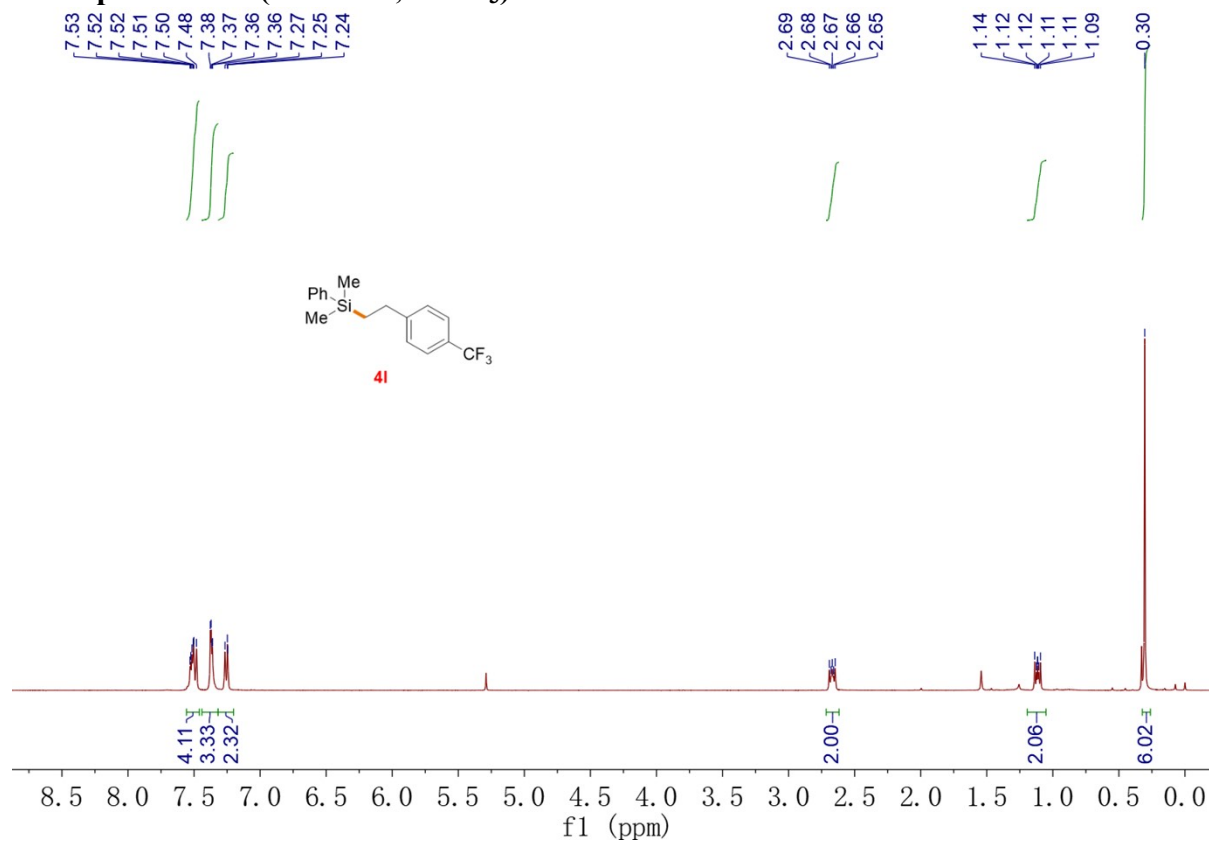

**<sup>13</sup>C NMR spectra of 4l (100 MHz, CDCl<sub>3</sub>)**

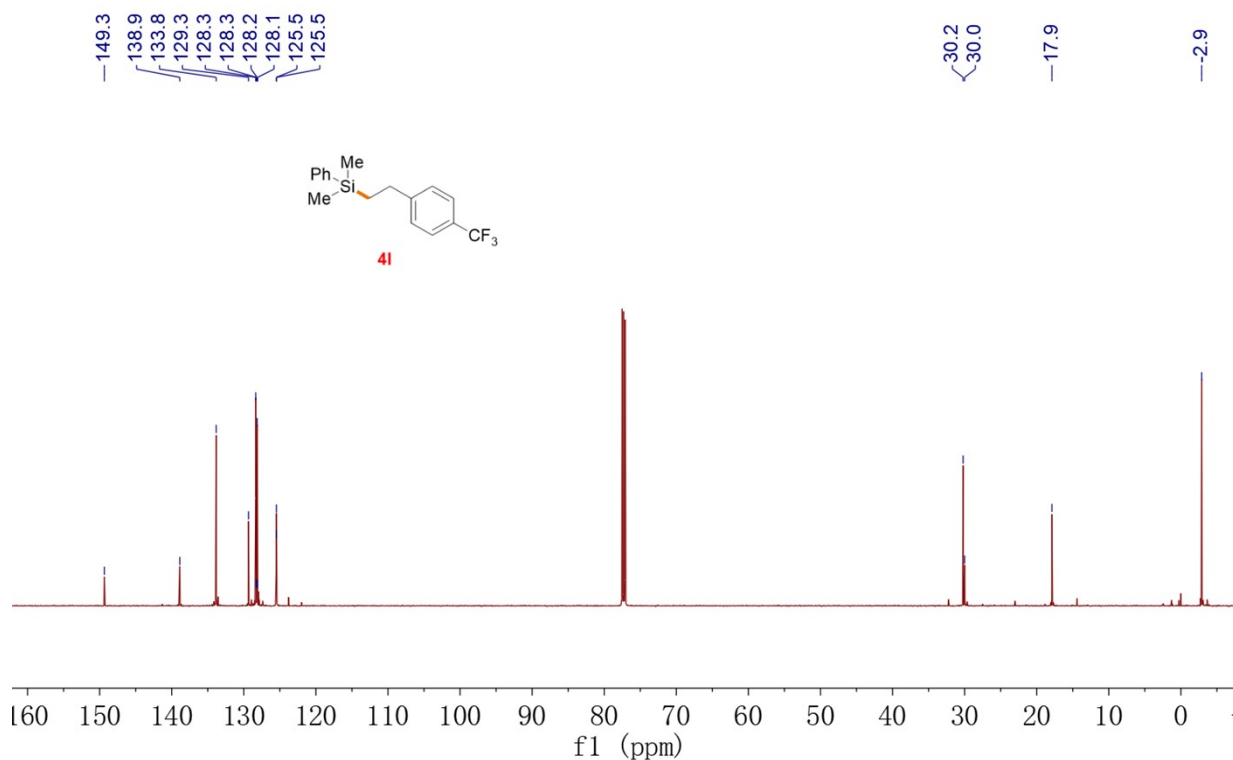

**<sup>1</sup>H NMR spectra of 4m (400 MHz, CDCl<sub>3</sub>)**

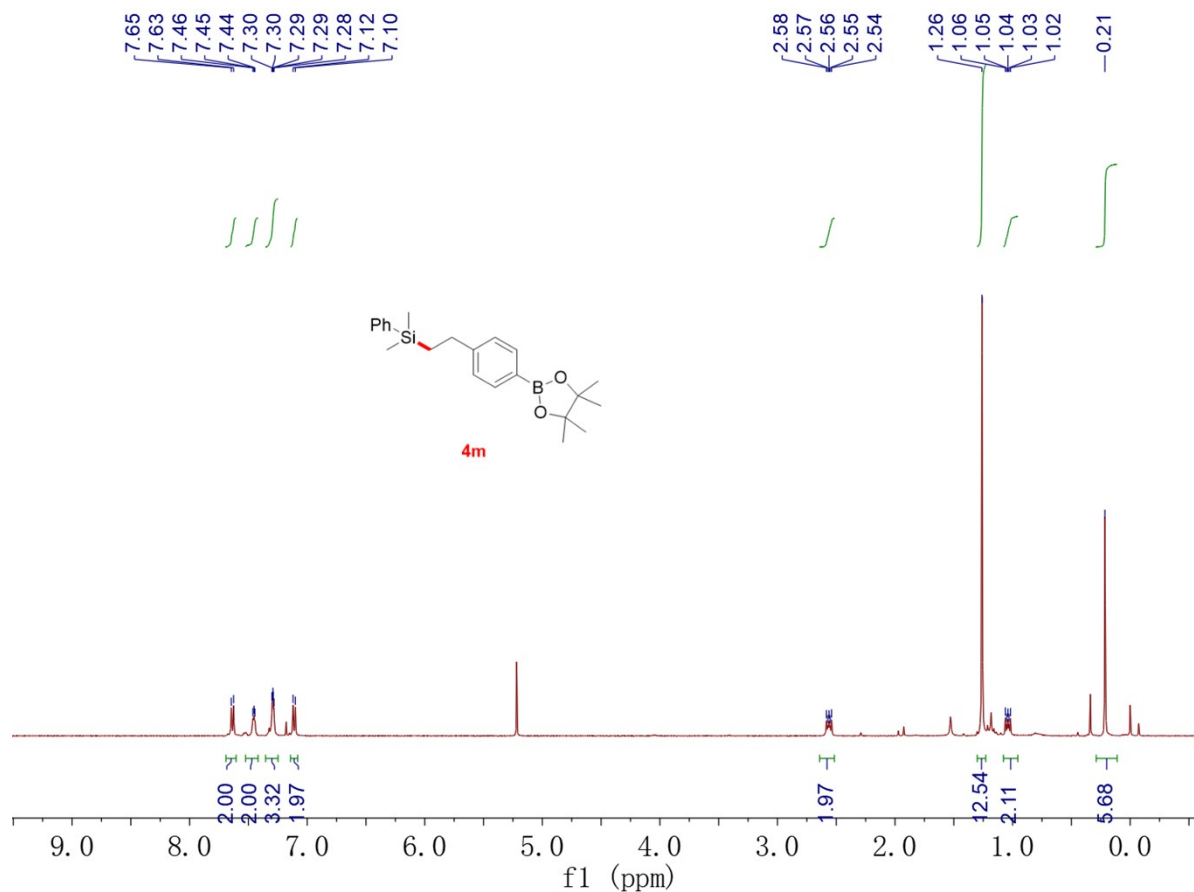

**<sup>13</sup>C NMR spectra of 4m (100 MHz, CDCl<sub>3</sub>)**

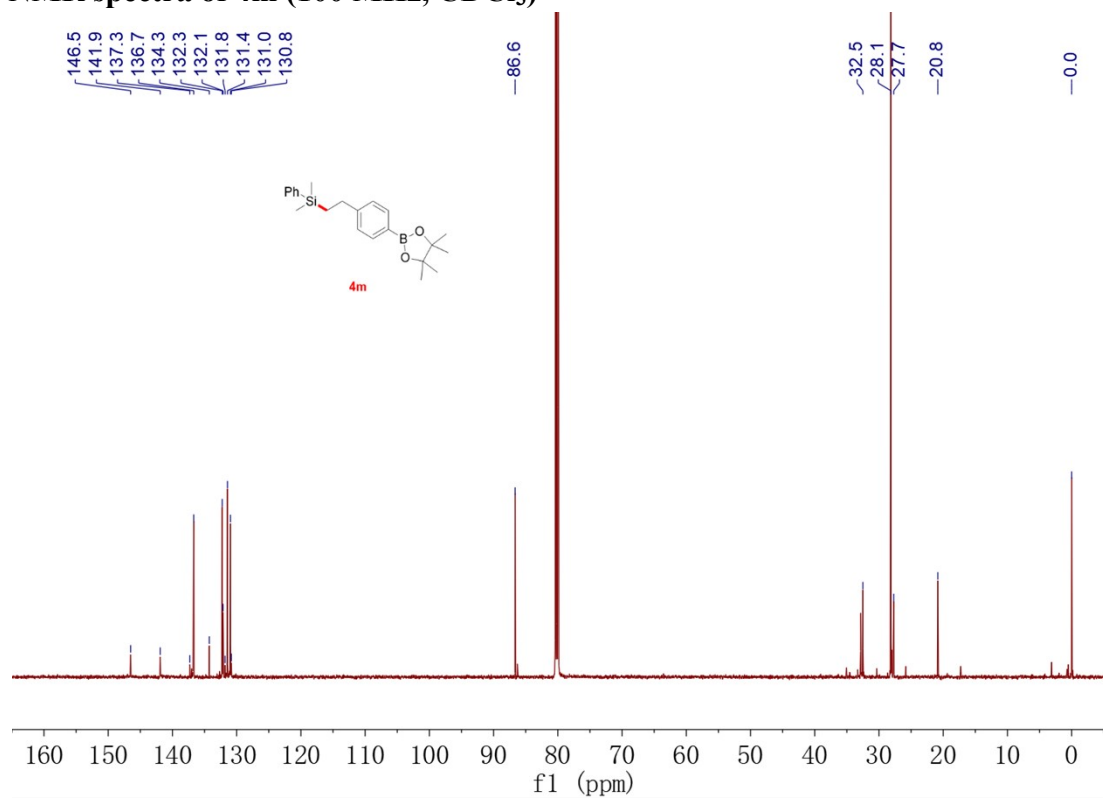

**<sup>1</sup>H NMR spectra of 4n (400 MHz, CDCl<sub>3</sub>)**

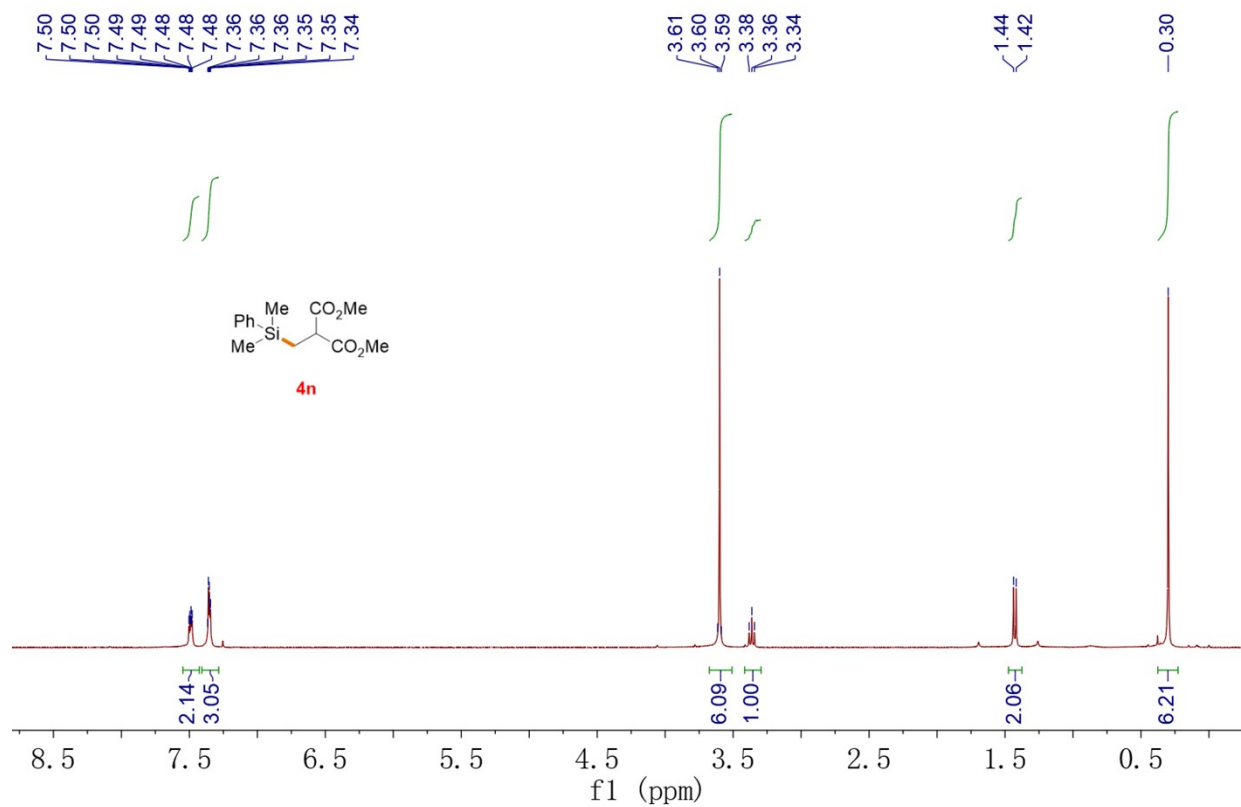

**<sup>13</sup>C NMR spectra of 4n (100 MHz, CDCl<sub>3</sub>)**

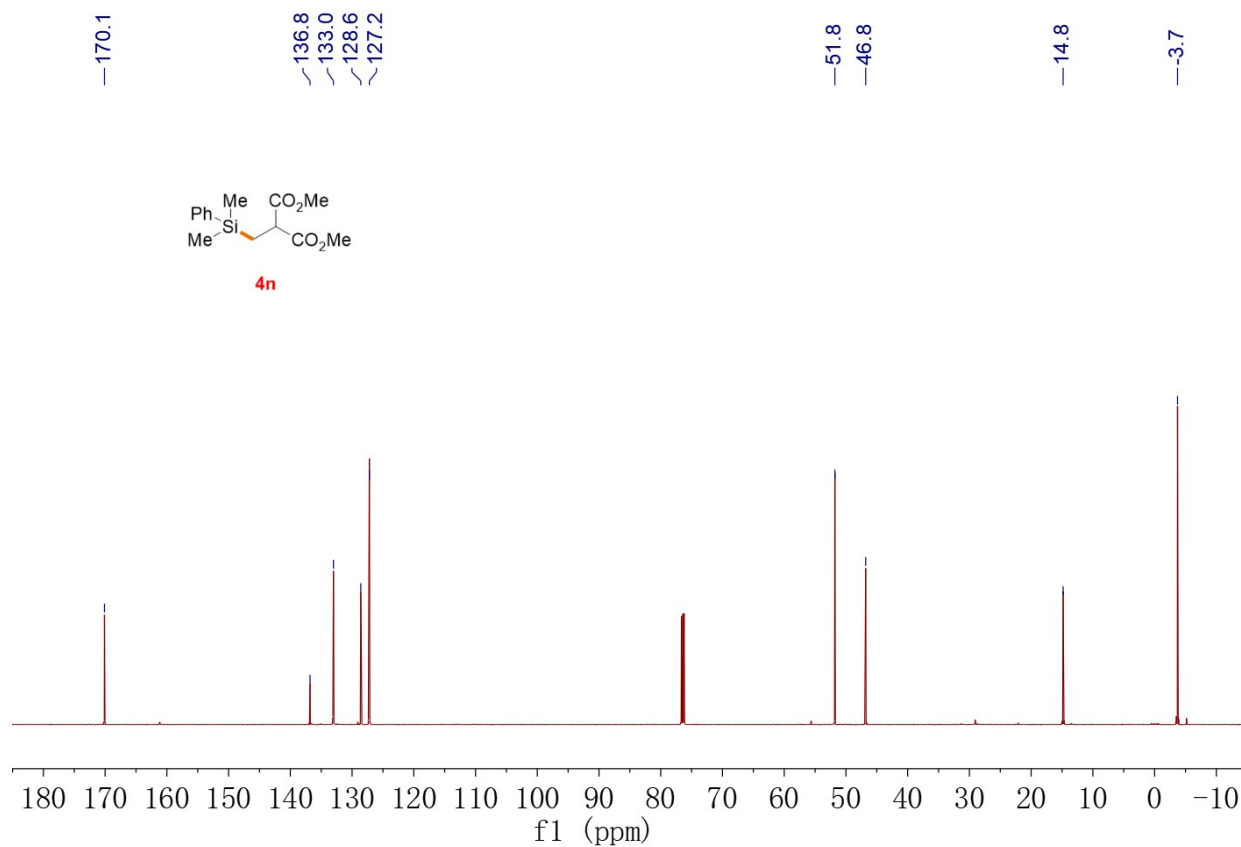

**<sup>1</sup>H NMR spectra of 4o (400 MHz, CDCl<sub>3</sub>)**

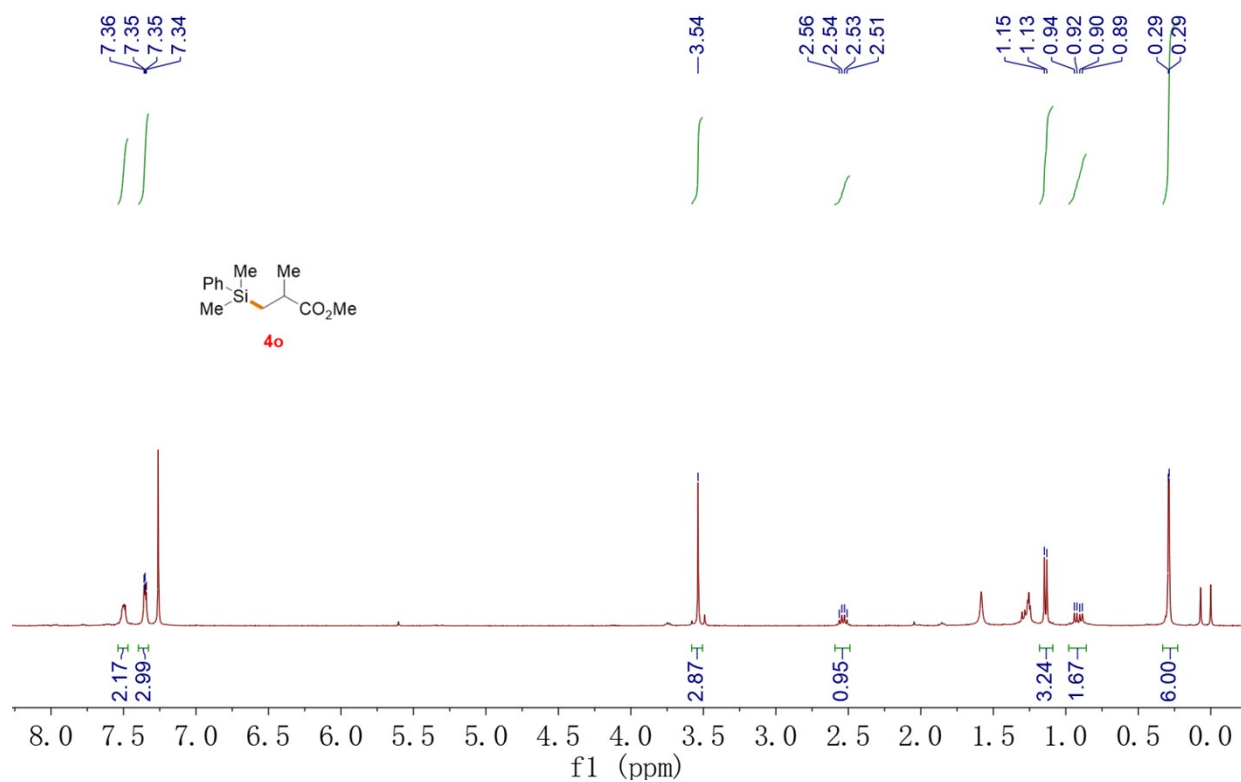

<sup>13</sup>C NMR spectra of **4o** (100 MHz, CDCl<sub>3</sub>)

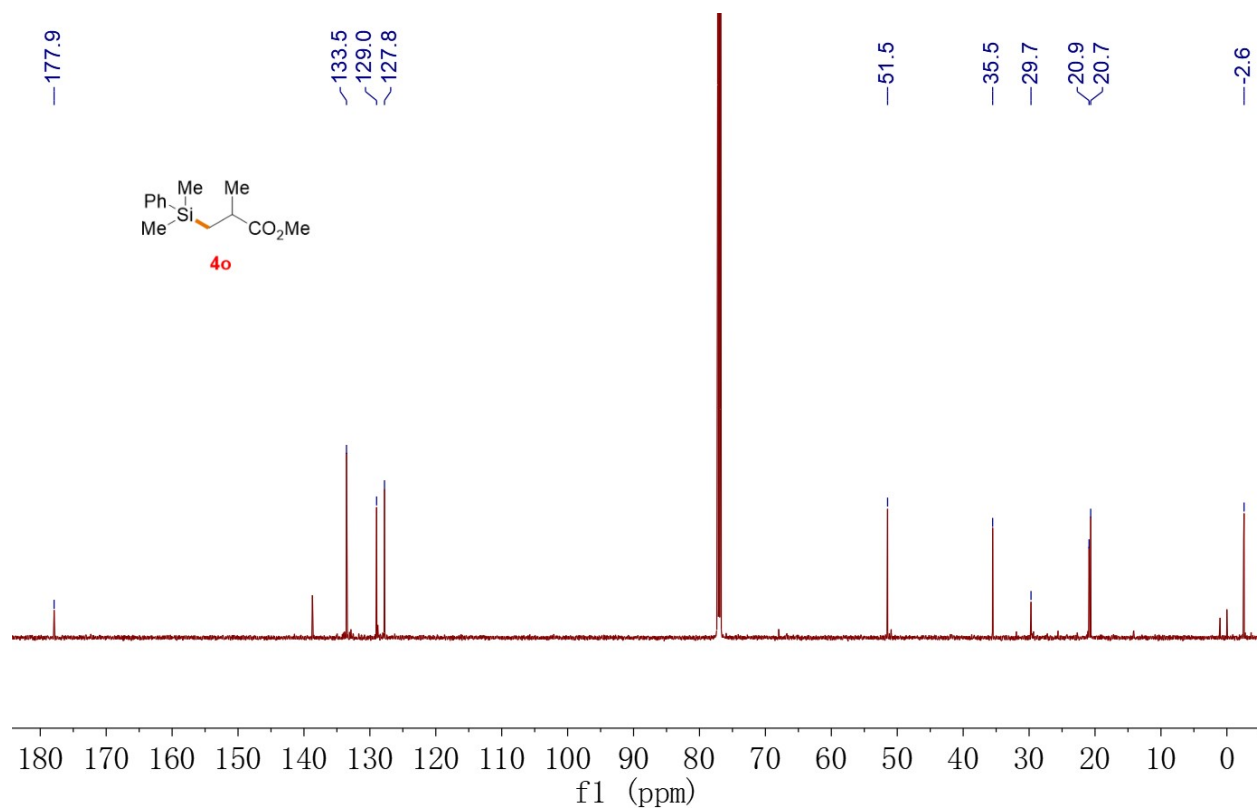

<sup>1</sup>H NMR spectra of **4p** (400 MHz, CDCl<sub>3</sub>)

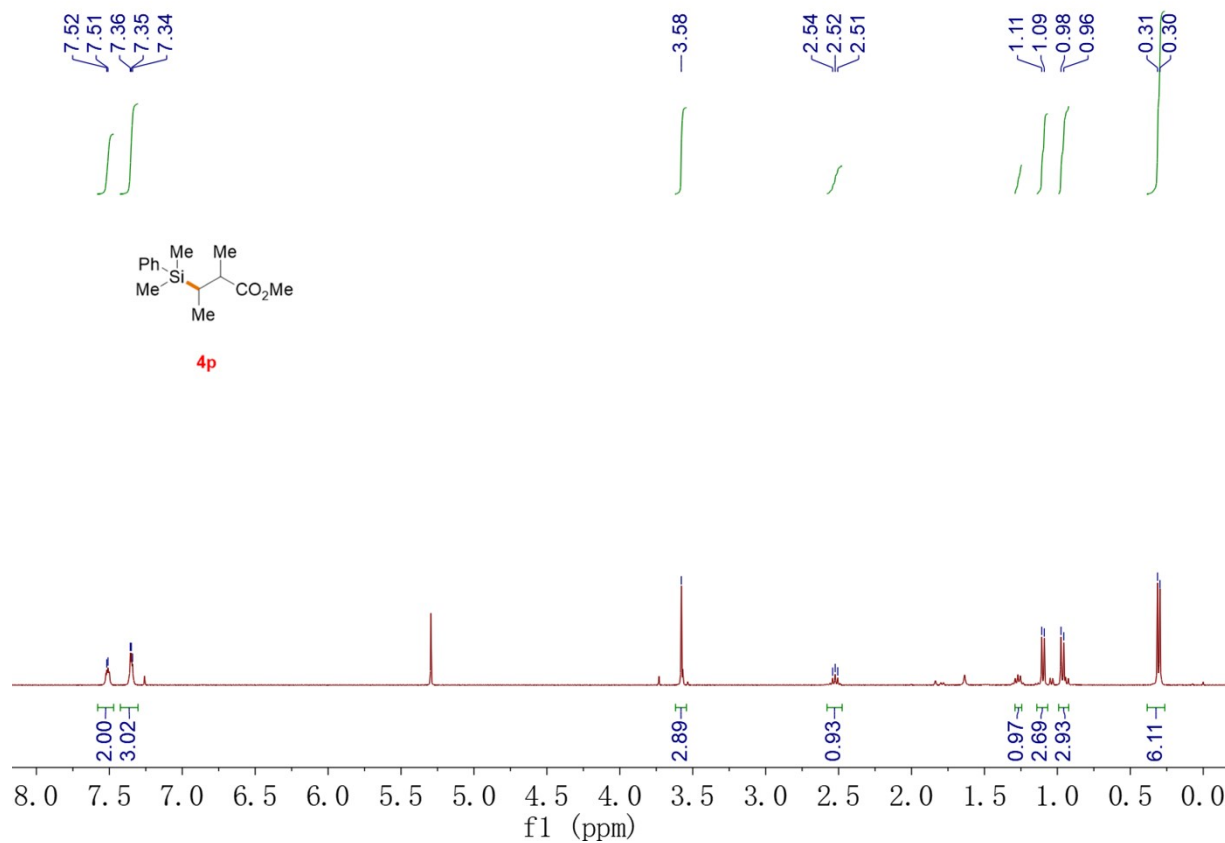

**<sup>13</sup>C NMR spectra of 4p (100 MHz, CDCl<sub>3</sub>)**

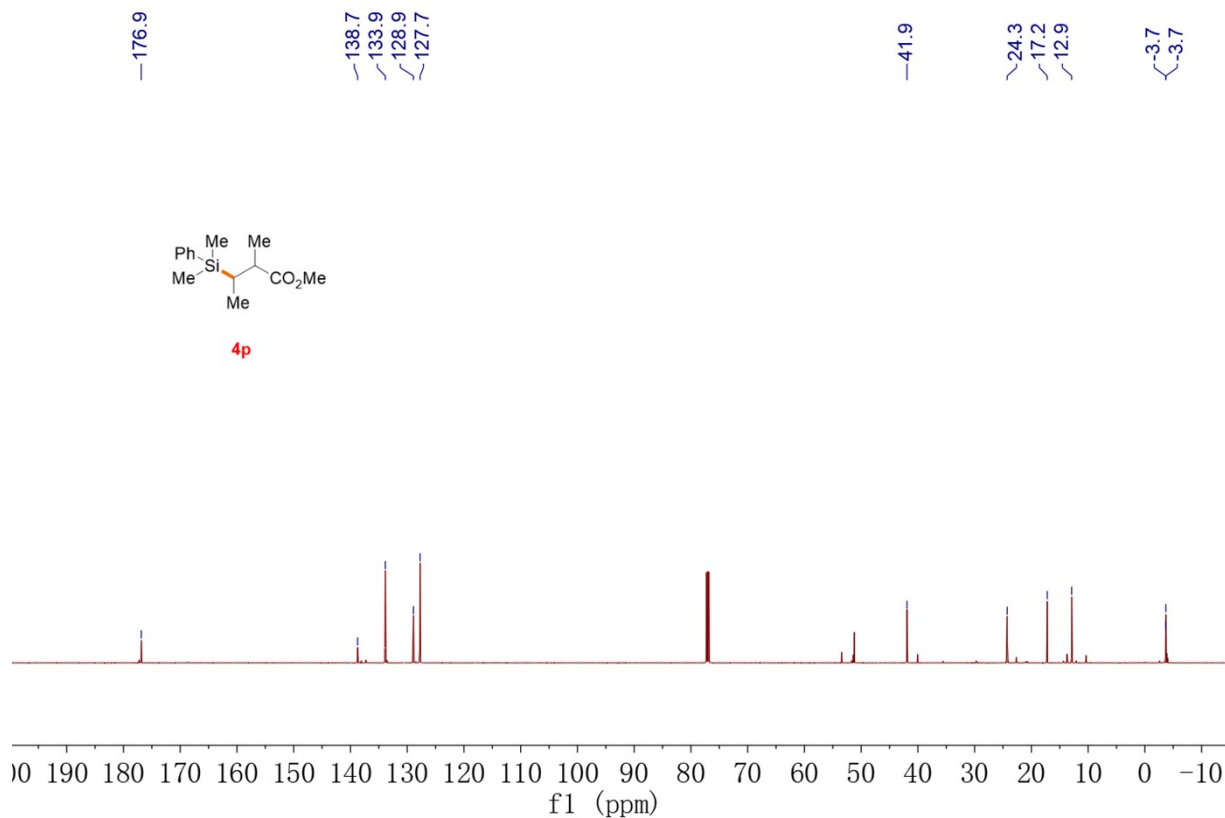

**<sup>1</sup>H NMR spectra of 4q (400 MHz, CDCl<sub>3</sub>)**

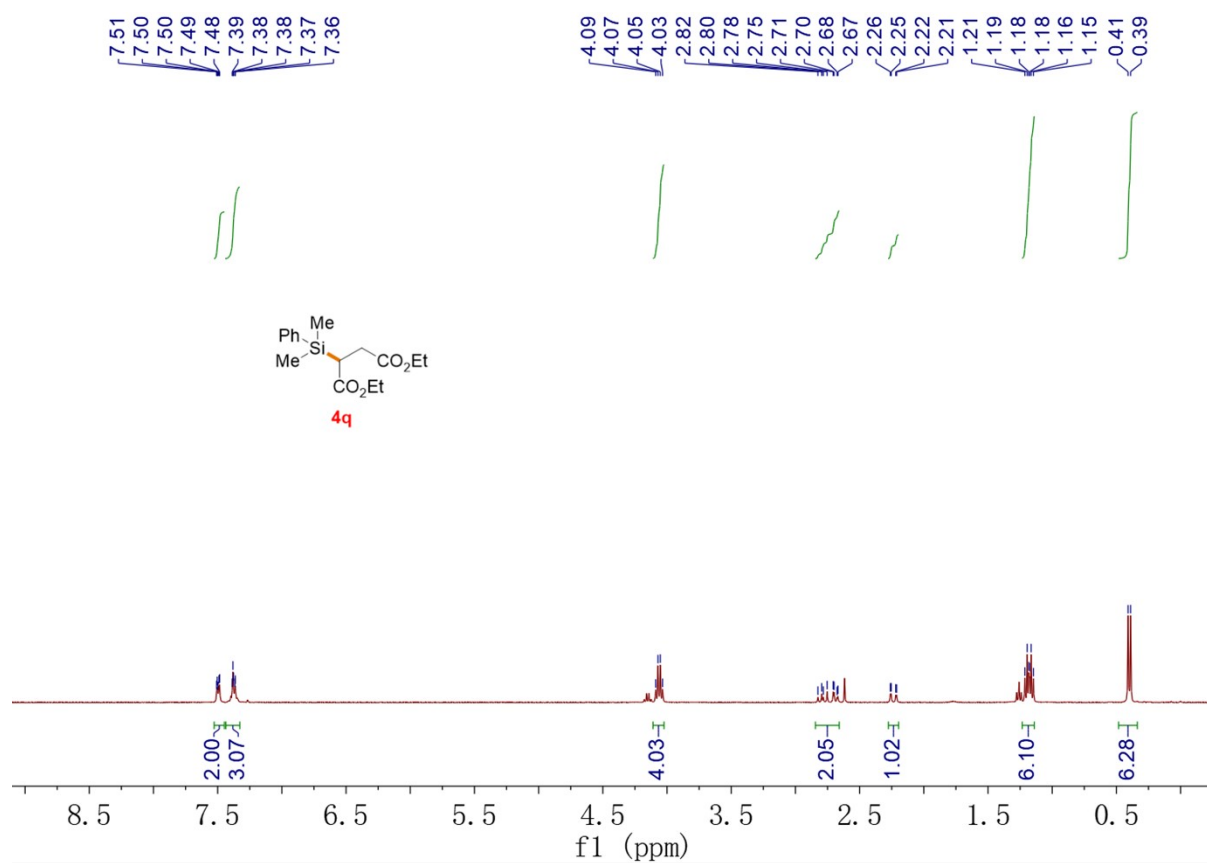

<sup>13</sup>C NMR spectra of 4q (100 MHz, CDCl<sub>3</sub>)

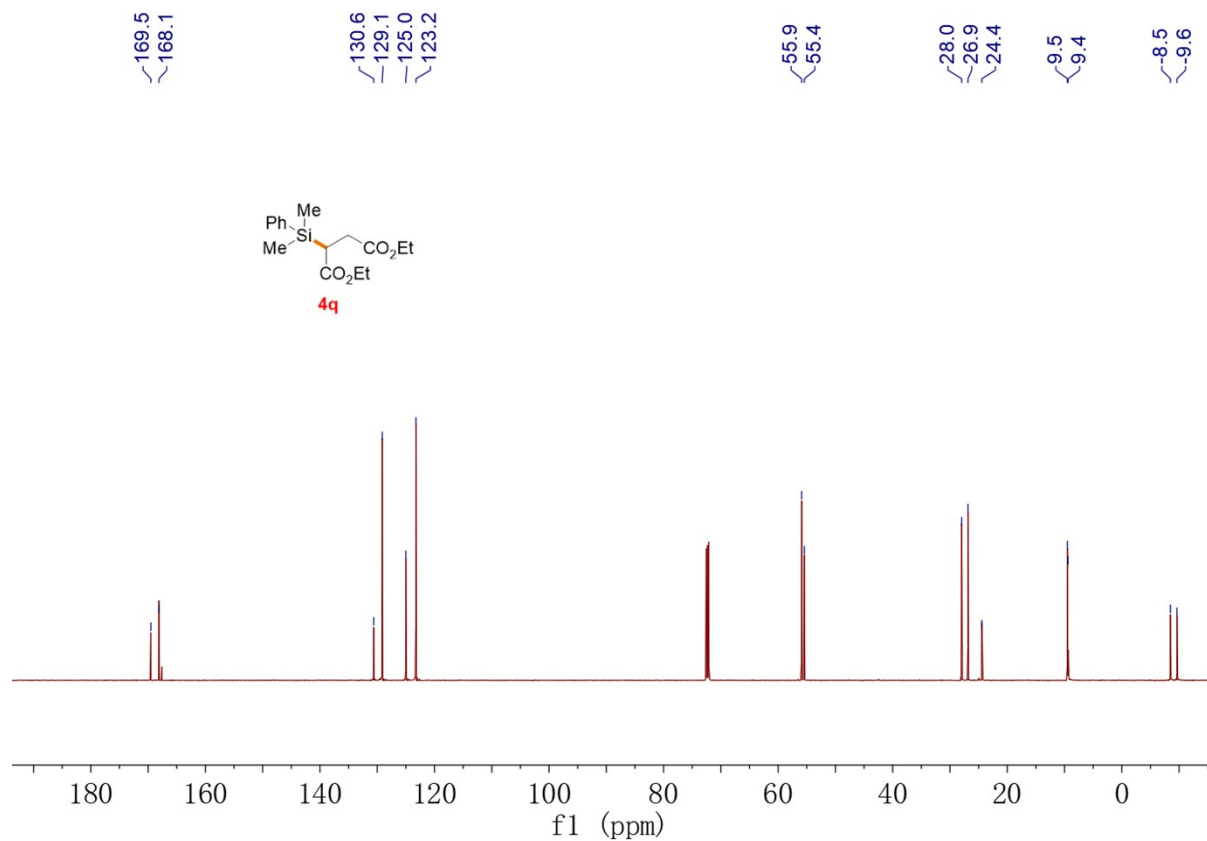

**<sup>1</sup>H NMR spectra of 4r (400 MHz, CDCl<sub>3</sub>)**

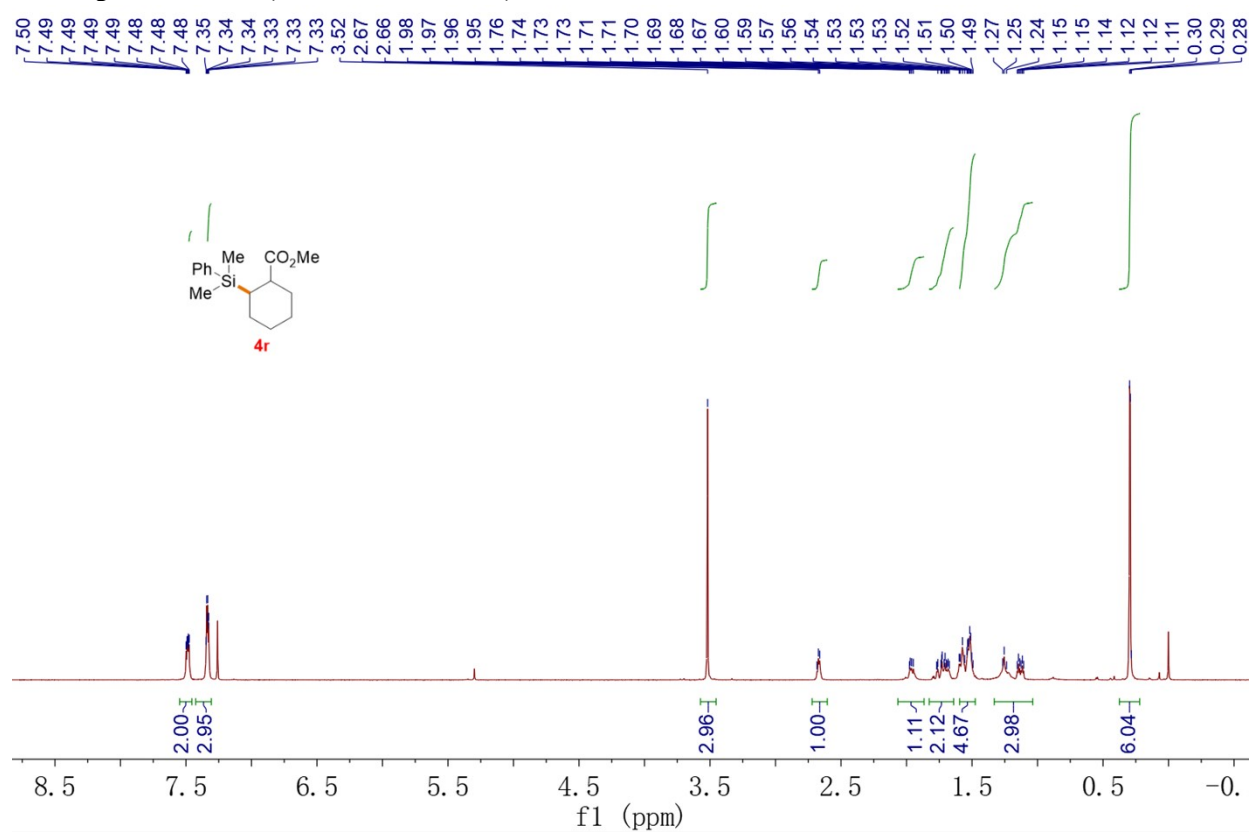

**<sup>13</sup>C NMR spectra of 4r (100 MHz, CDCl<sub>3</sub>)**

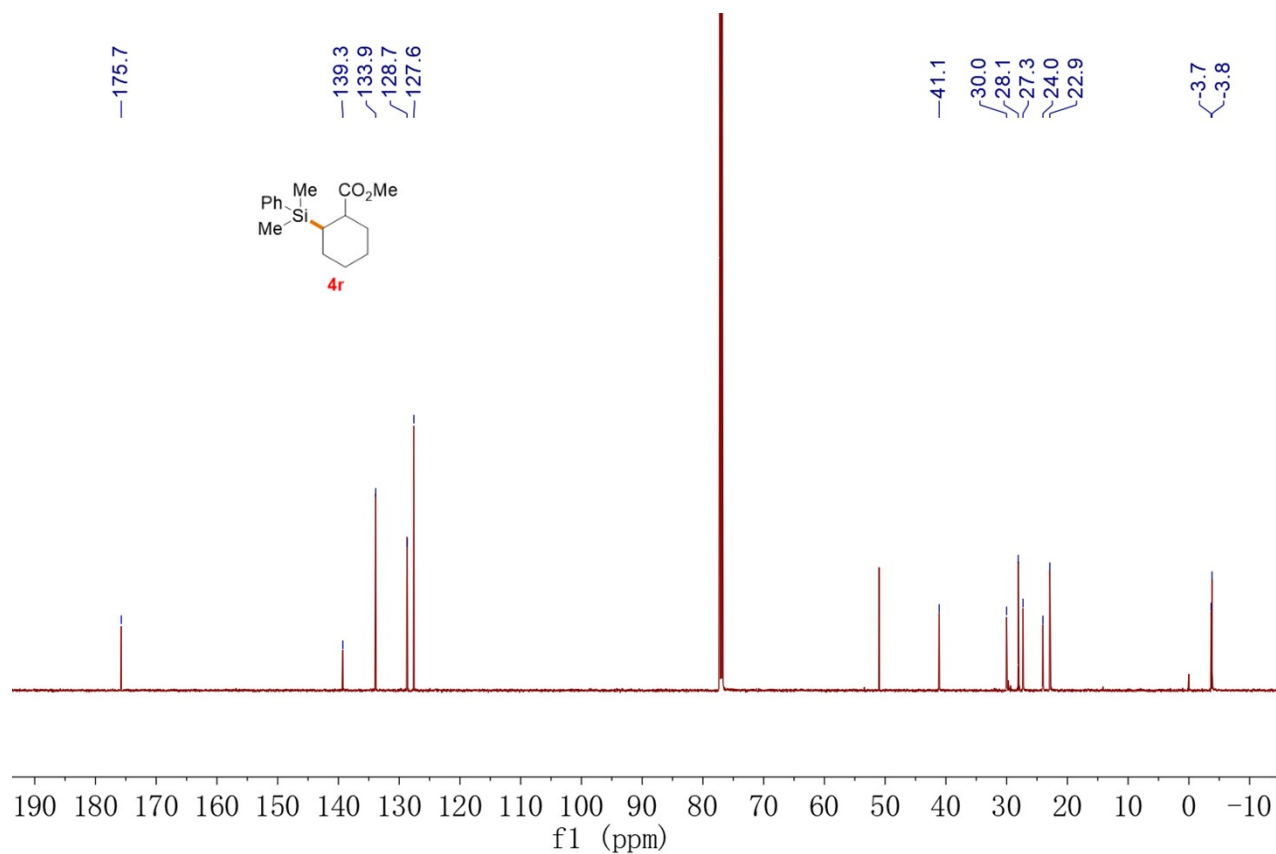

**$^1\text{H}$  NMR spectra of 4s' (400 MHz,  $\text{CDCl}_3$ )**

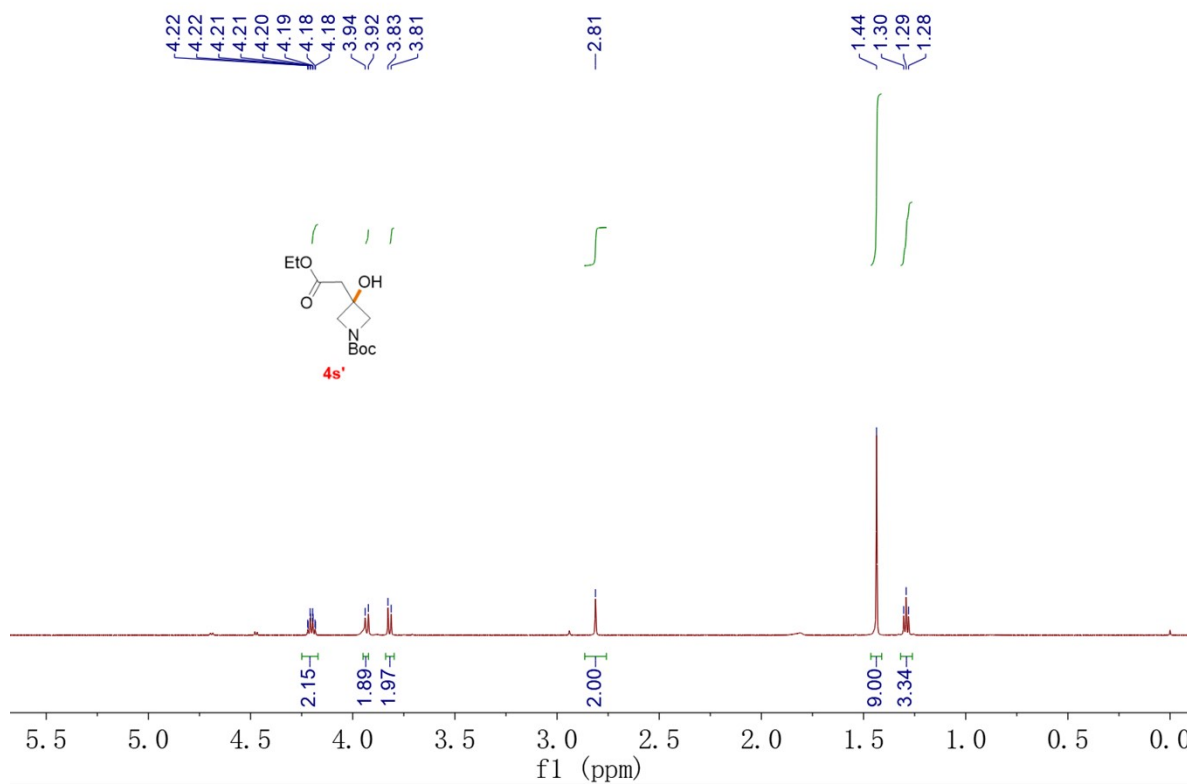

**$^{13}\text{C}$  NMR spectra of 4s' (100 MHz,  $\text{CDCl}_3$ )**

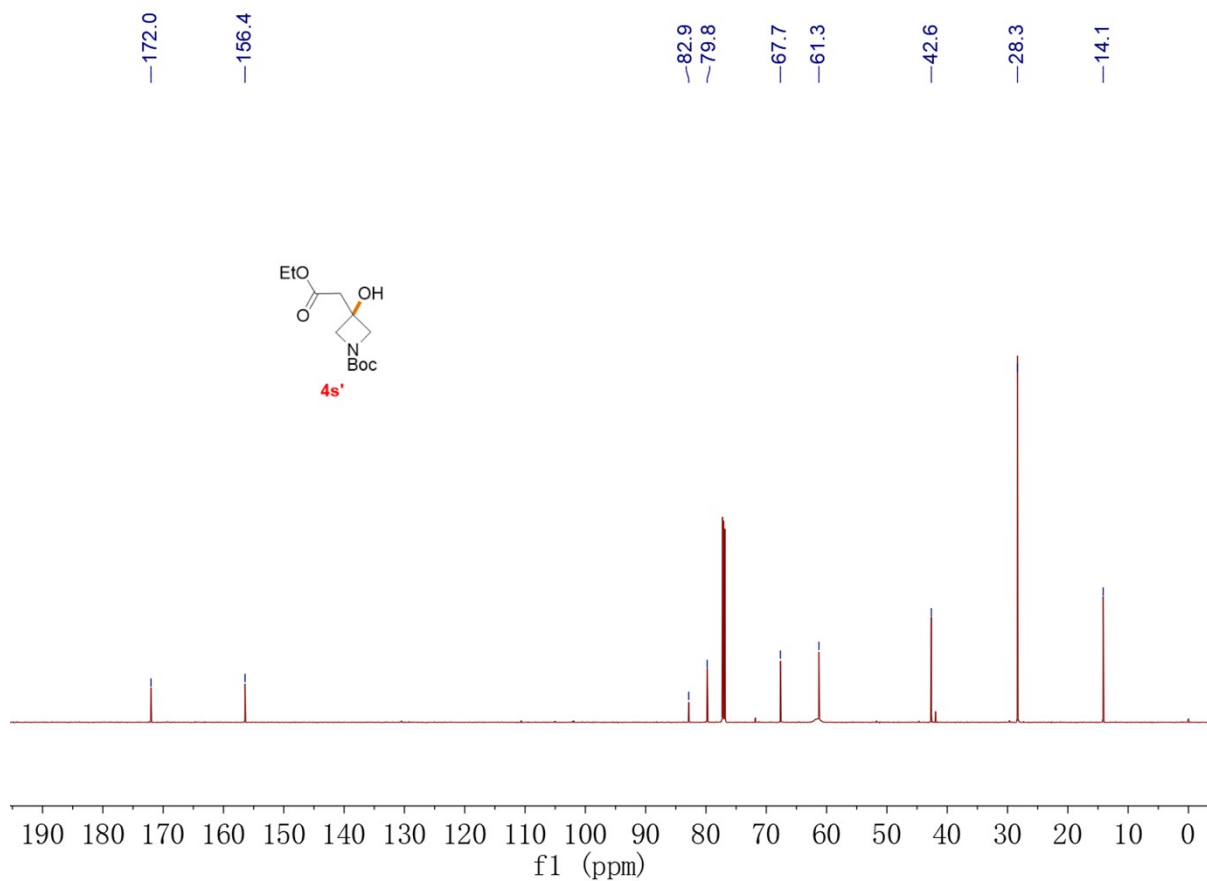

**$^1\text{H}$  NMR spectra of 4t' (400 MHz,  $\text{CDCl}_3$ )**

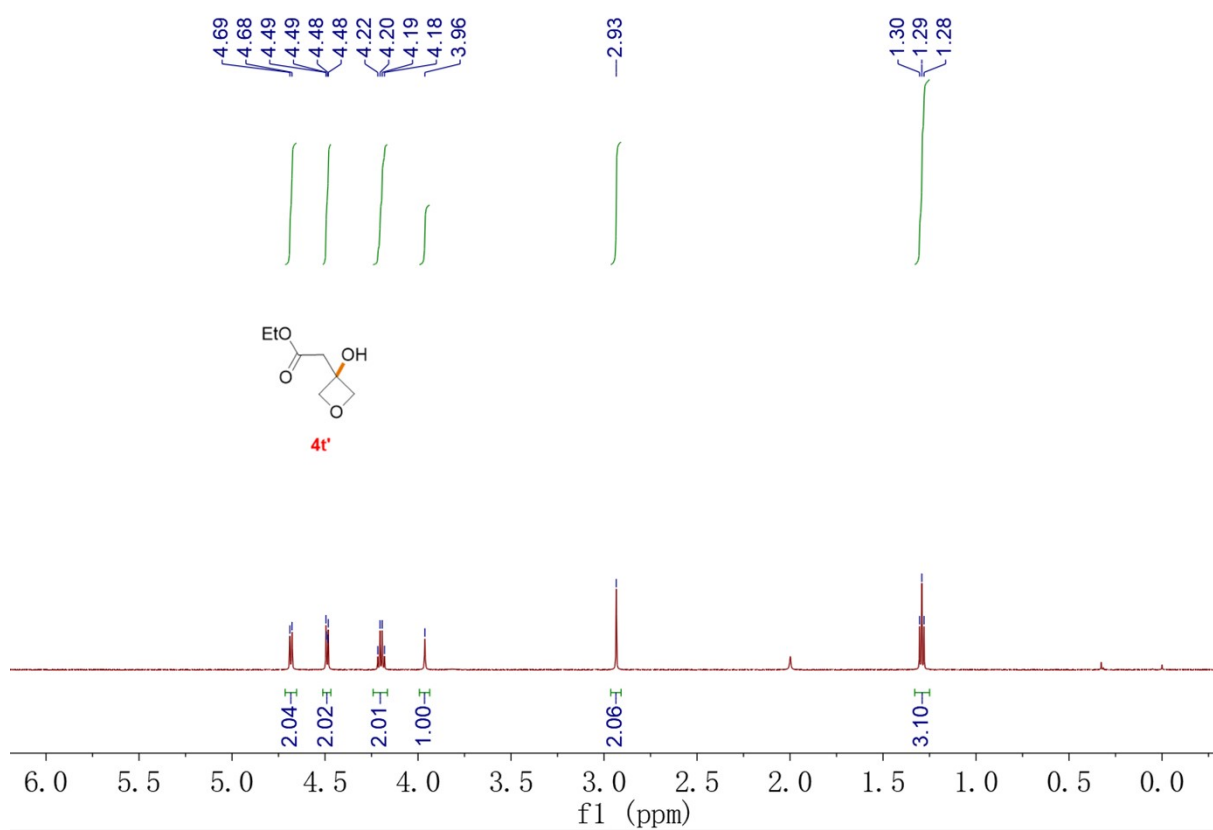

**$^{13}\text{C}$  NMR spectra of 4t' (100 MHz,  $\text{CDCl}_3$ )**

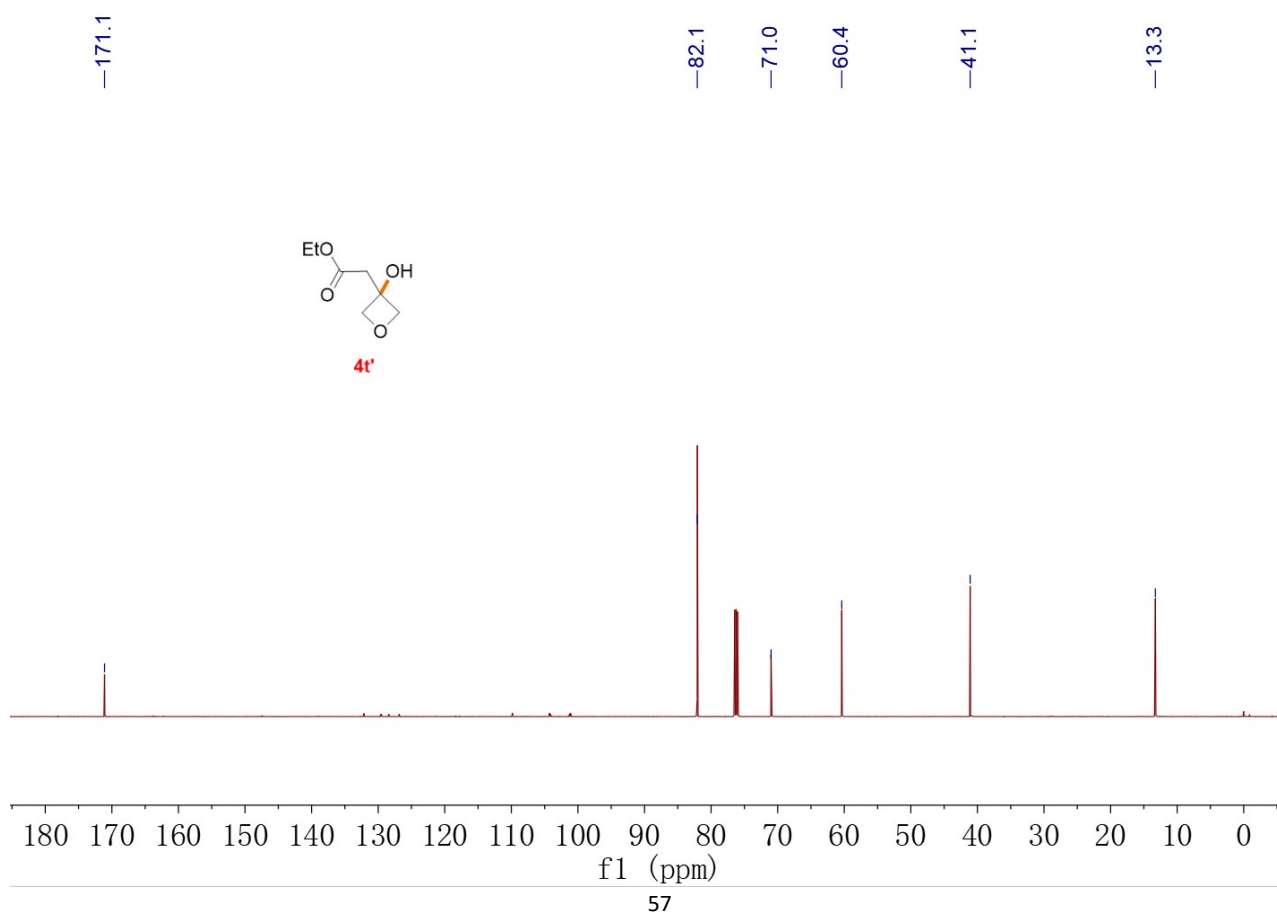

**<sup>1</sup>H NMR spectra of 4v (400 MHz, CDCl<sub>3</sub>)**

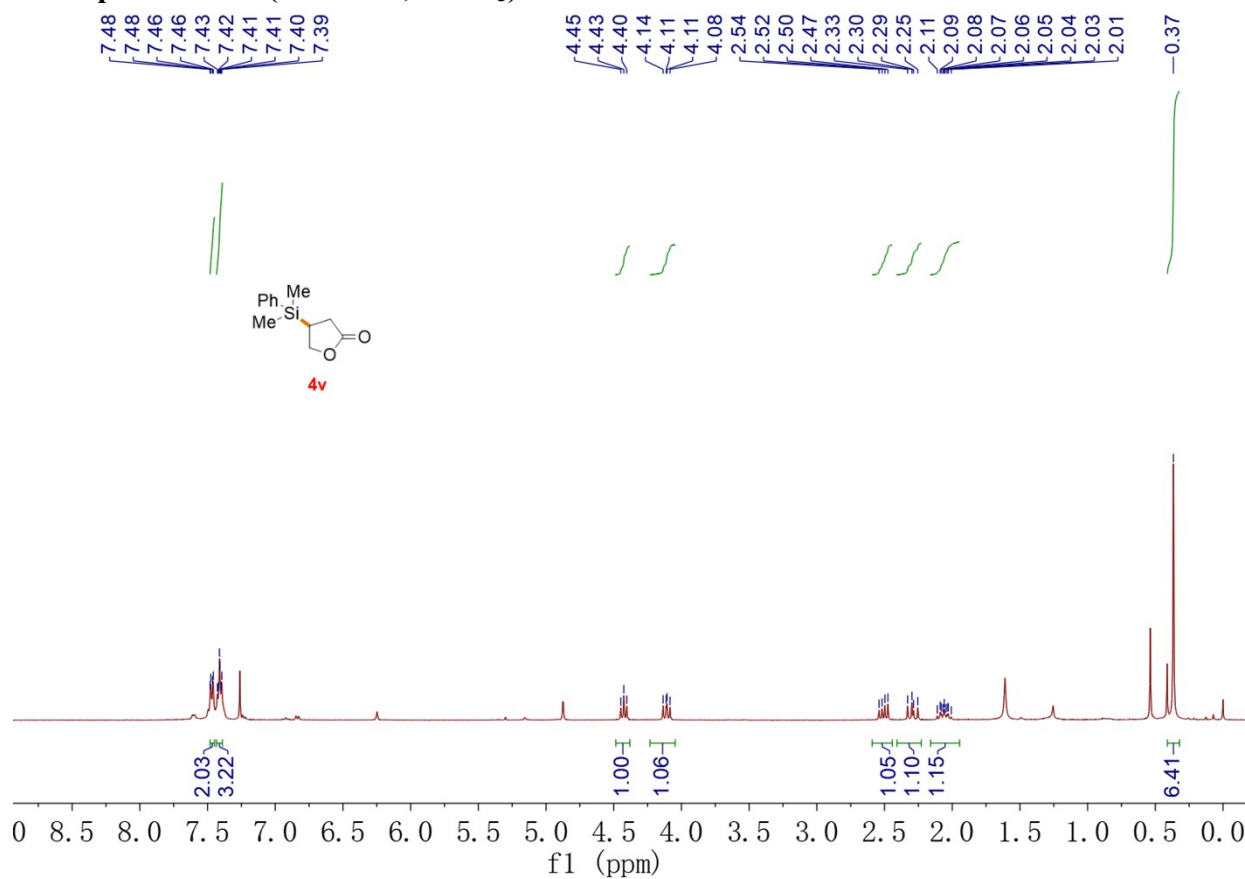

**<sup>13</sup>C NMR spectra of 4v (100 MHz, CDCl<sub>3</sub>)**

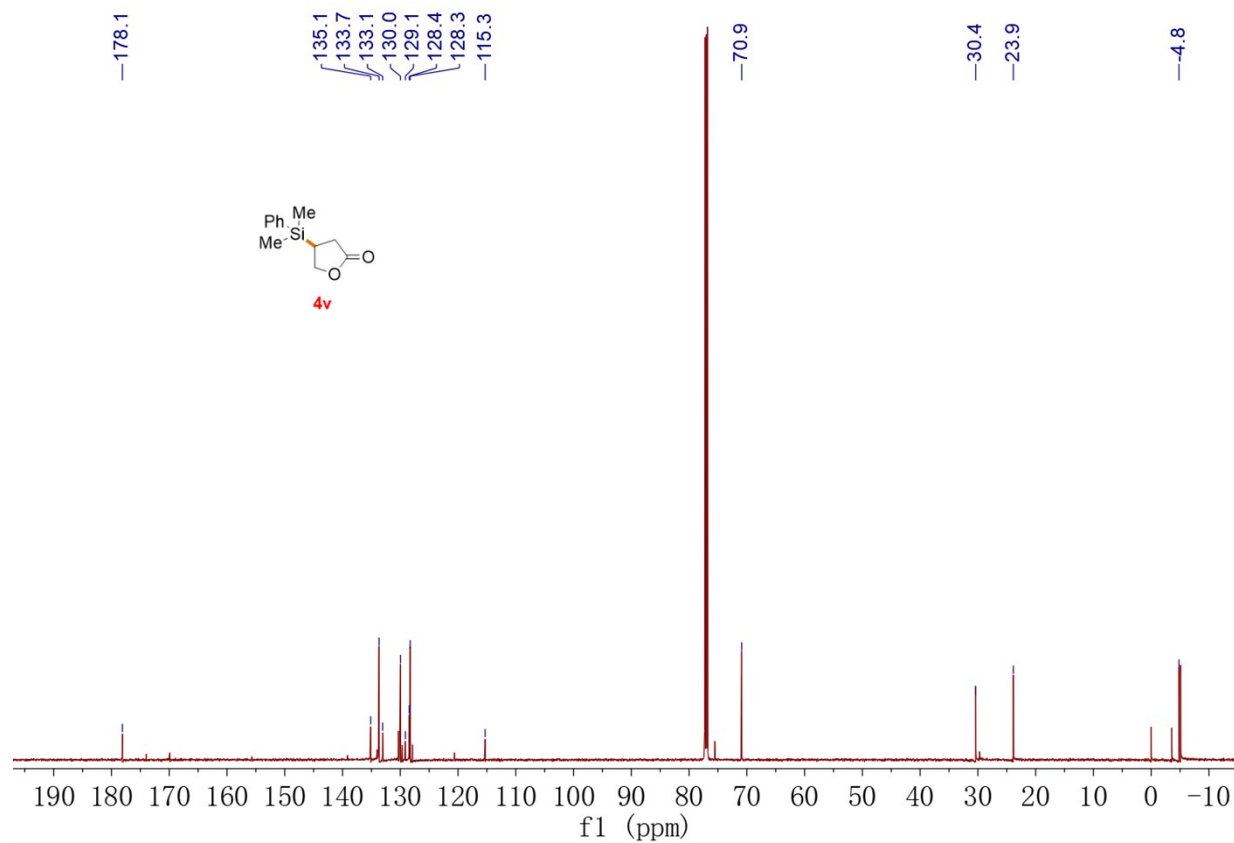

**$^1\text{H}$  NMR spectra of 4w (400 MHz,  $\text{CDCl}_3$ )**

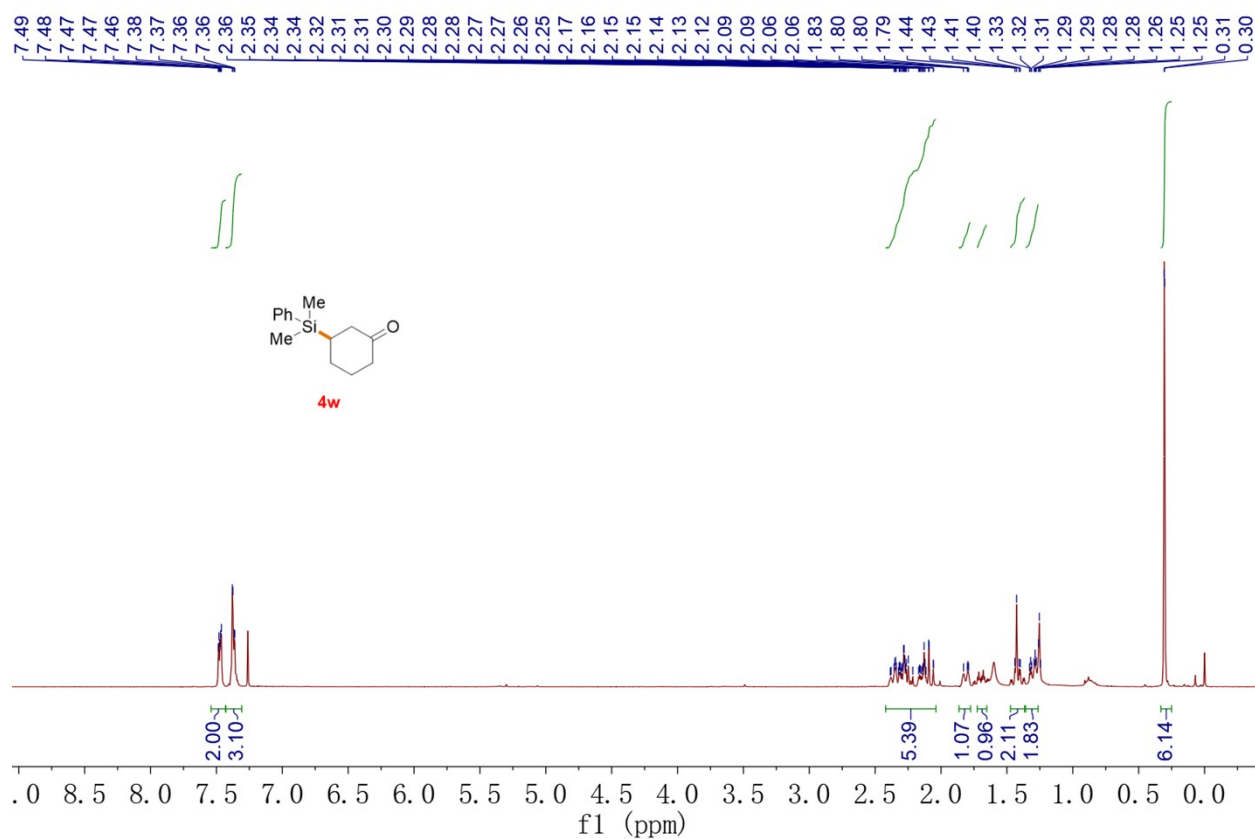

**$^{13}\text{C}$  NMR spectra of 4w (100 MHz,  $\text{CDCl}_3$ )**

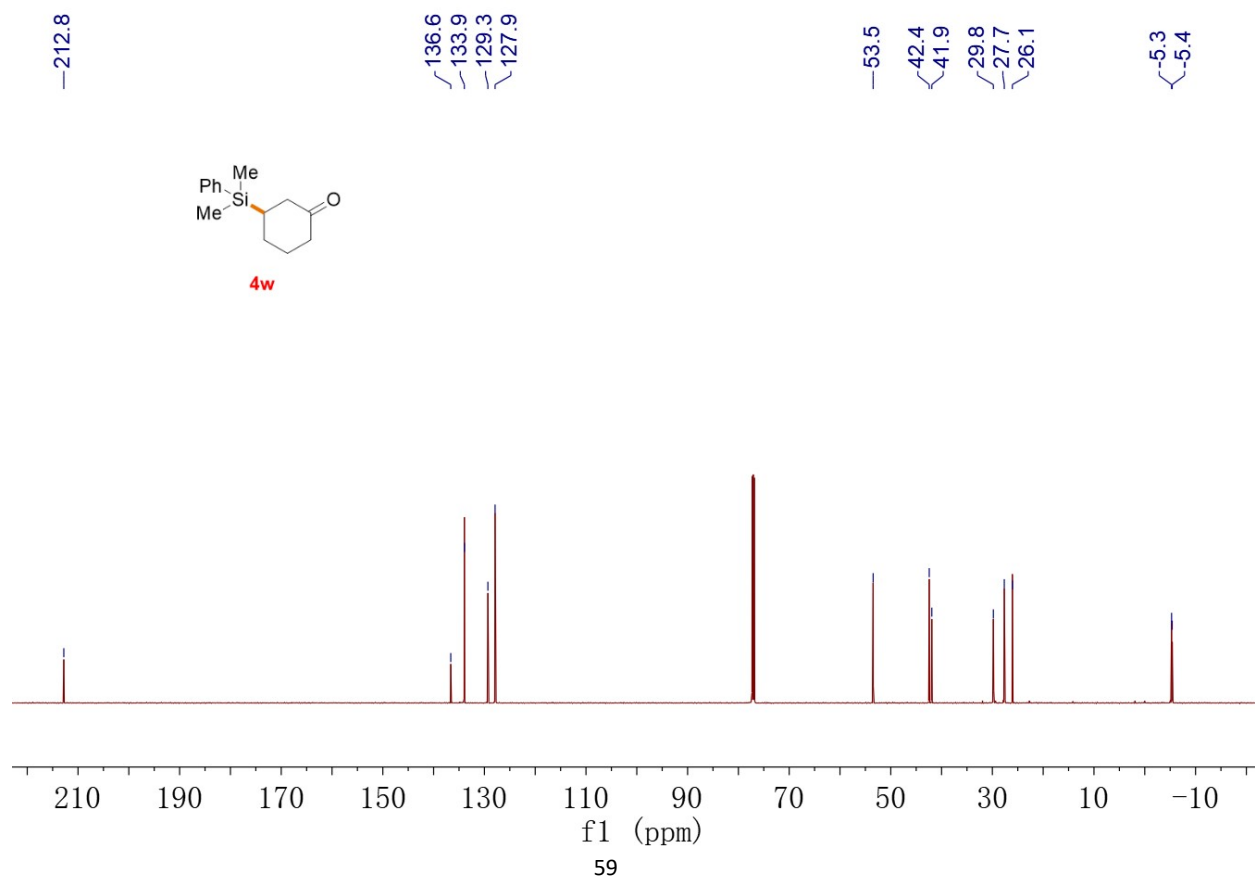

**$^1\text{H}$  NMR spectra of 5a (400 MHz,  $\text{CDCl}_3$ )**

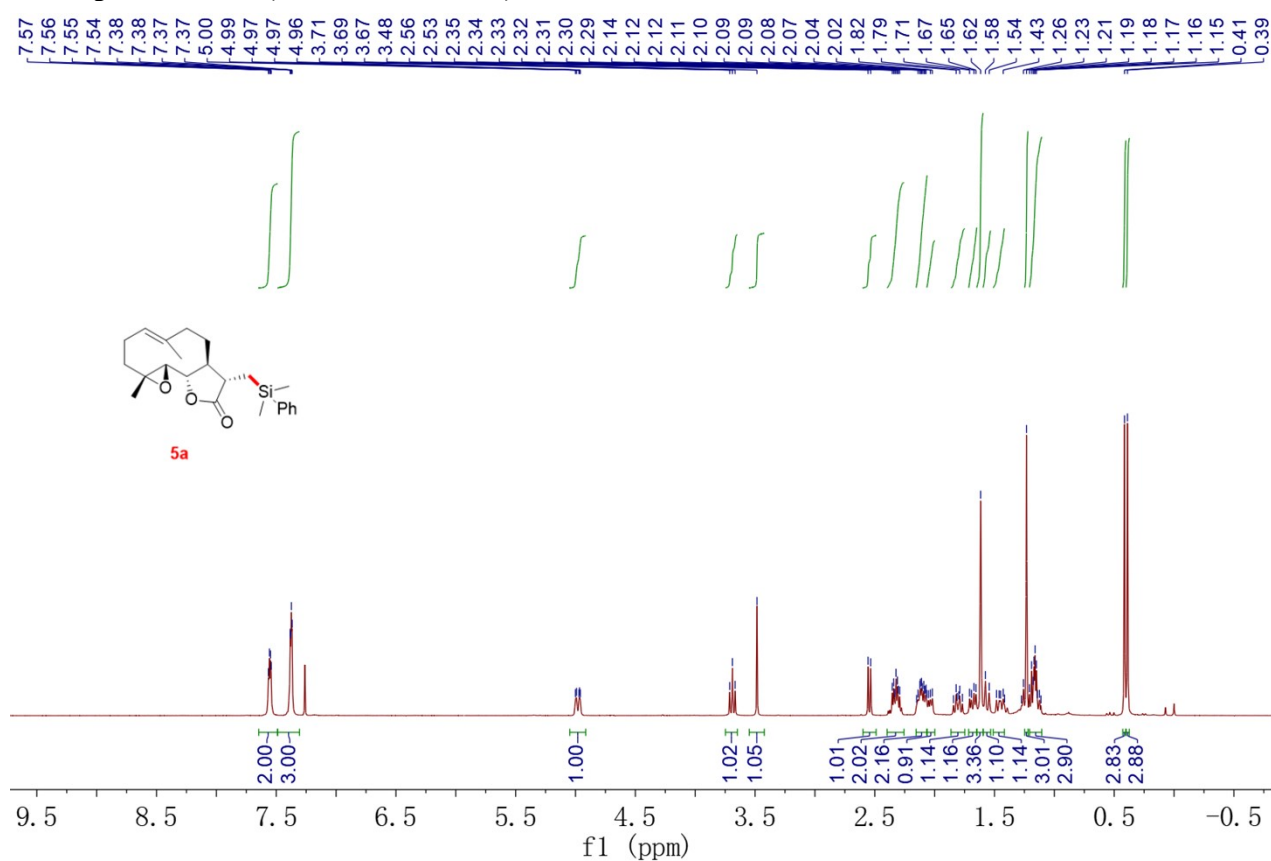

**$^{13}\text{C}$  NMR spectra of 5a (100 MHz,  $\text{CDCl}_3$ )**

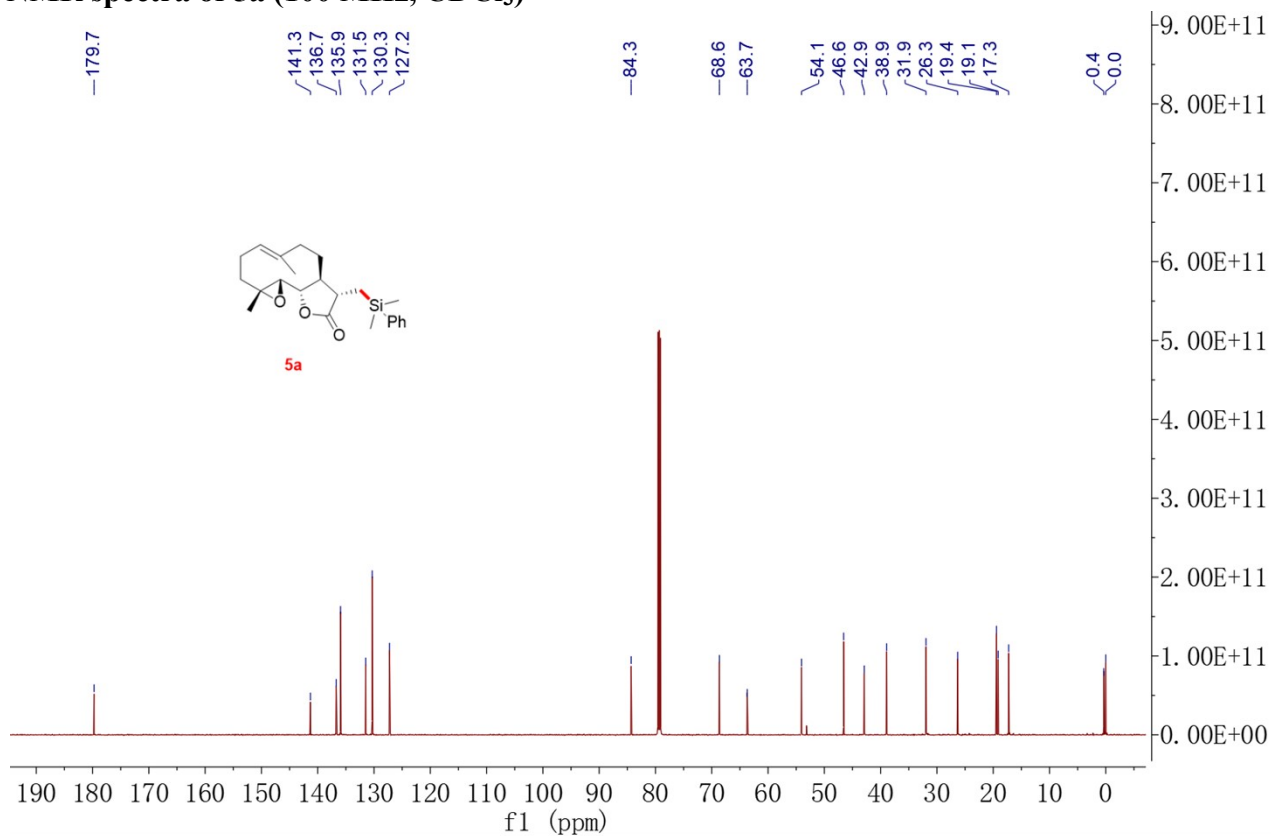

Chemical structure of **5b** is shown above the spectrum. The <sup>1</sup>H NMR spectrum (CDCl<sub>3</sub>) displays the following chemical shifts (ppm) and integration values:

| Chemical Shift (ppm) | Integration |
|----------------------|-------------|
| 7.52                 | 2.22        |
| 7.34                 | 3.21        |
| 6.25                 | 1.02        |
| 5.43                 | 0.72        |
| 4.97                 | 0.97        |
| 4.23                 | 0.77        |
| 4.03                 | 0.95        |
| 3.83                 | 1.08        |
| 3.63                 | 1.00        |
| 3.43                 | 1.03        |
| 3.23                 | 1.00        |
| 2.03                 | 0.99        |
| 1.83                 | 0.97        |
| 1.63                 | 0.95        |
| 1.43                 | 1.08        |
| 1.23                 | 3.01        |
| 1.03                 | 2.11        |
| 0.83                 | 2.97        |
| 0.63                 | 1.46        |
| 0.43                 | 6.05        |
| 0.23                 | 1.08        |
| 0.03                 | 6.18        |

Chemical structure of **5b** is shown above the spectrum. The <sup>13</sup>C NMR spectrum (CDCl<sub>3</sub>) shows the following chemical shifts (ppm): 227.2, 140.4, 135.5, 131.2, 130.0, 98.7, 75.2, 75.1, 73.6, 64.9, 62.6, 62.4, 54.9, 48.8, 41.2, 40.5, 40.1, 35.5, 34.6, 31.4, 23.5, 21.6, 20.5, 13.4, and -0.6.

## 61



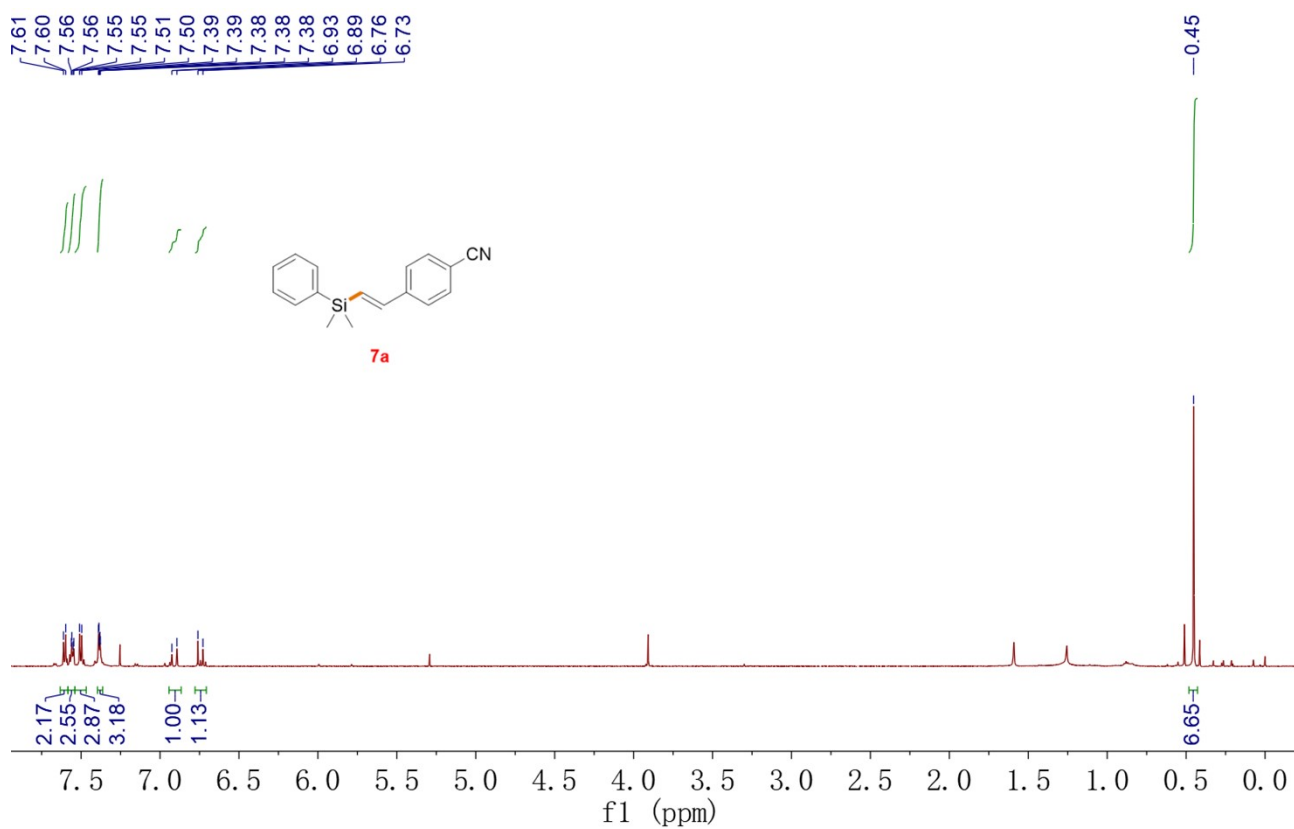

**<sup>13</sup>C NMR spectra of **7a** (100 MHz, CDCl<sub>3</sub>)**

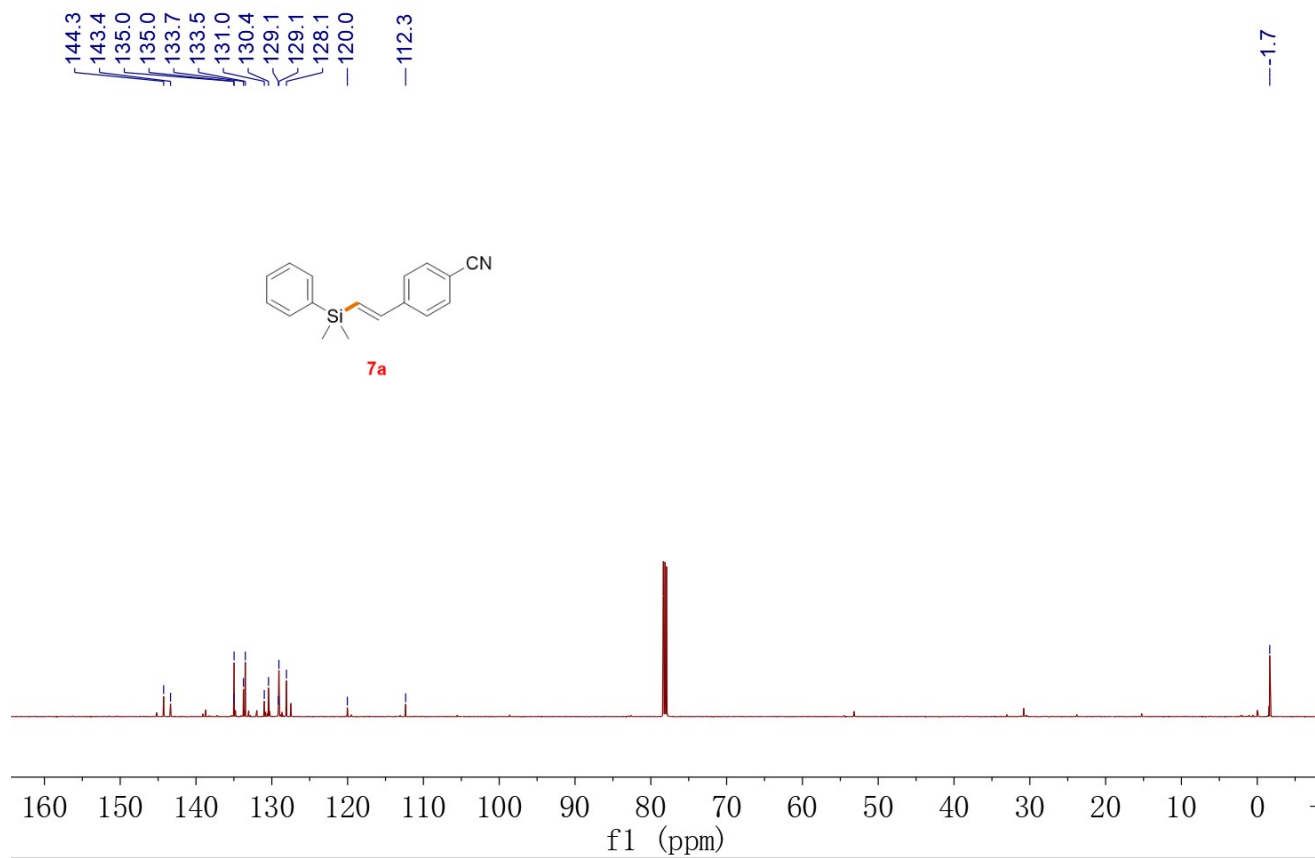

**<sup>1</sup>H NMR spectra of **7a'** (400 MHz, CDCl<sub>3</sub>)**

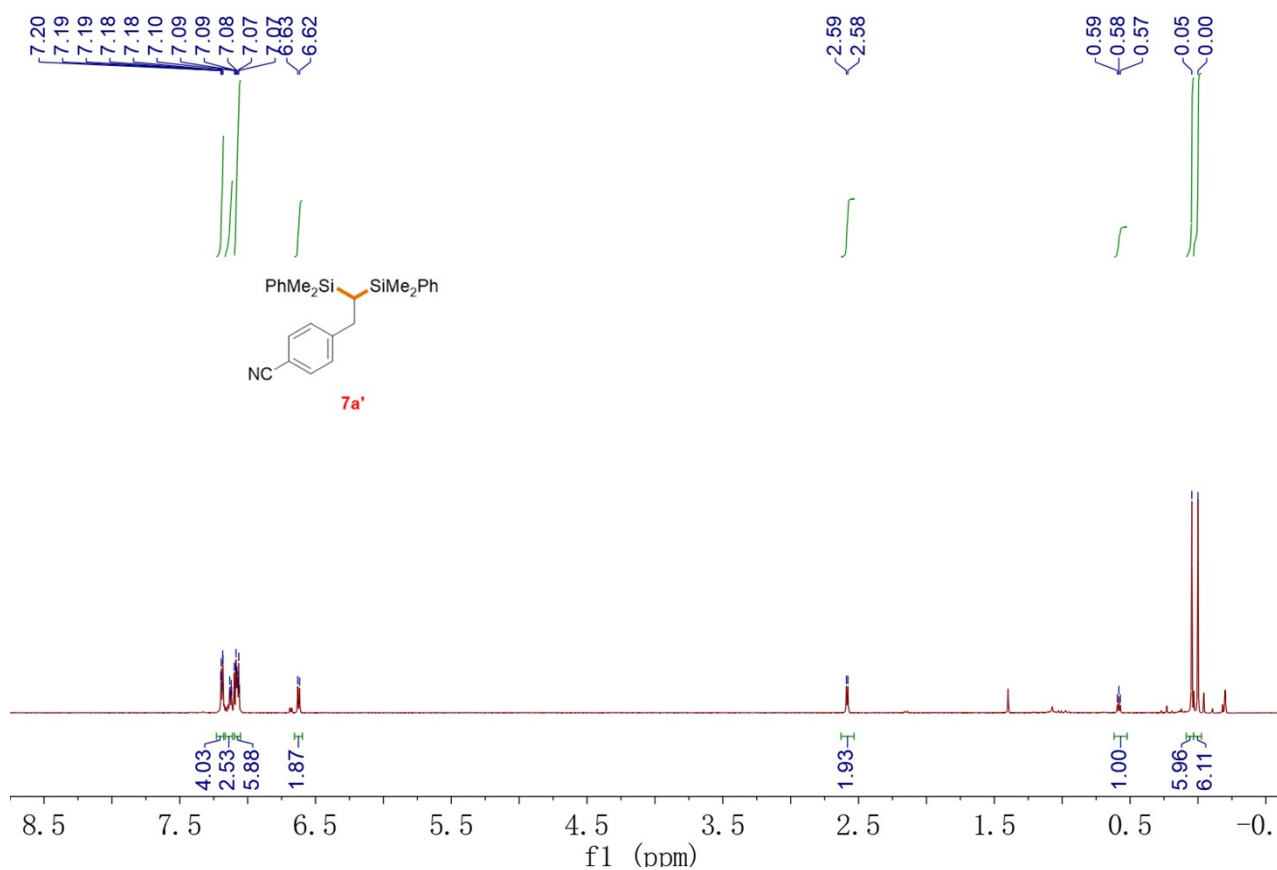

**<sup>13</sup>C NMR spectra of 7a' (100 MHz, CDCl<sub>3</sub>)**

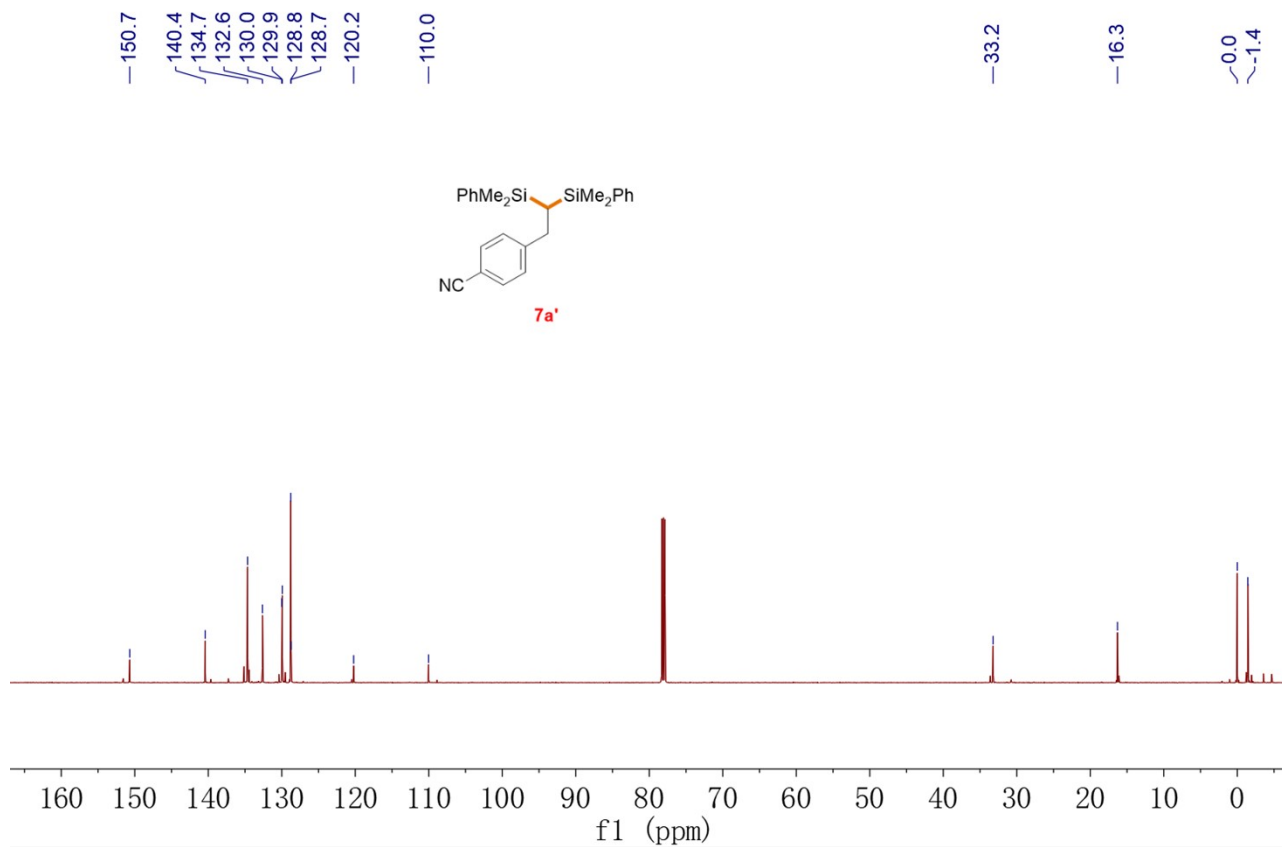

**$^1\text{H}$  NMR spectra of 7b (400 MHz,  $\text{CDCl}_3$ )**

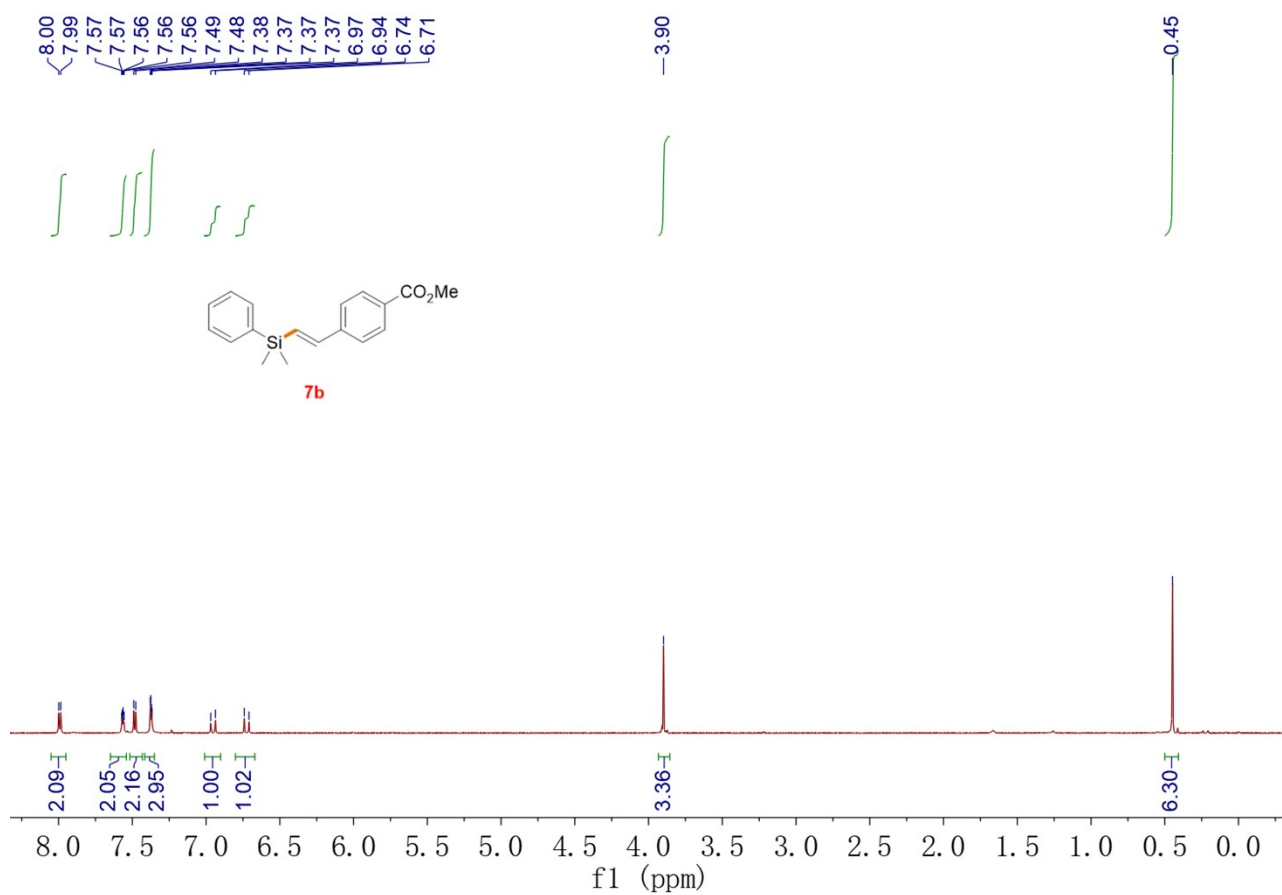

**$^{13}\text{C}$  NMR spectra of 7b (100 MHz,  $\text{CDCl}_3$ )**

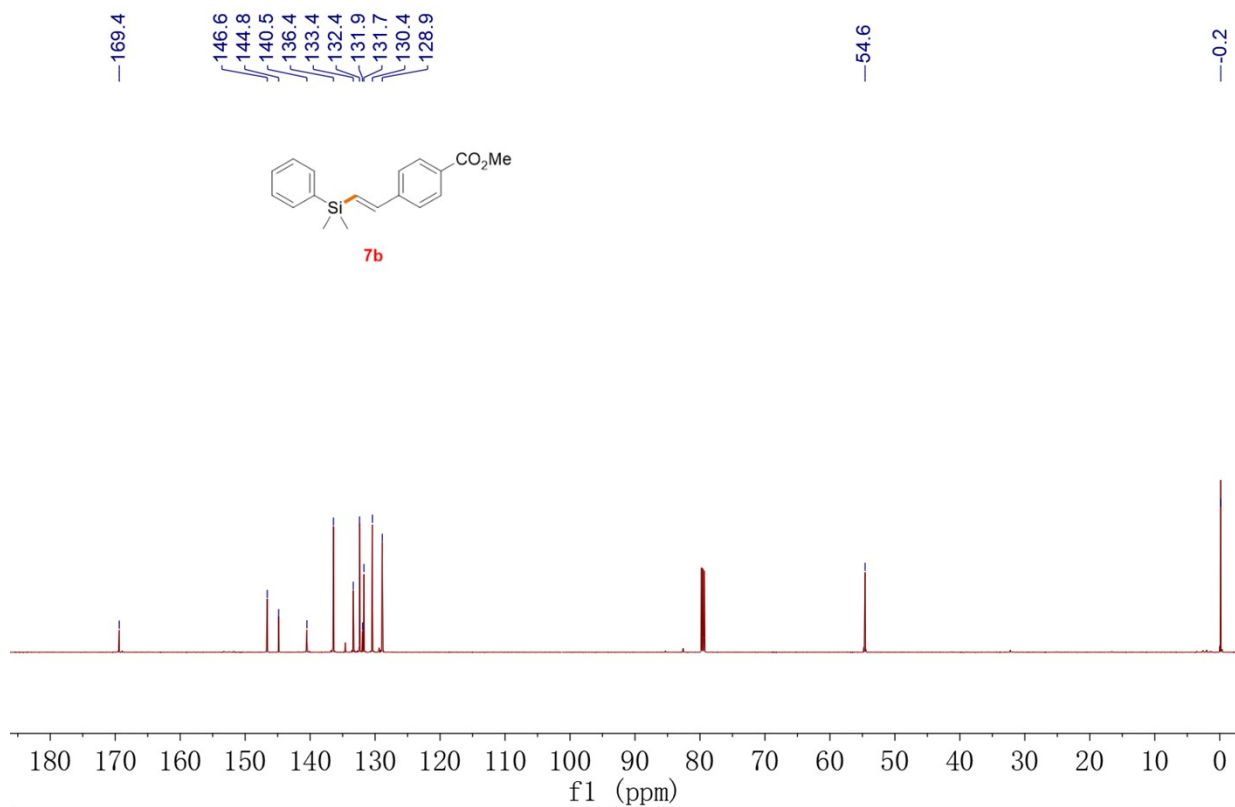

**<sup>1</sup>H NMR spectra of 7b' (400 MHz, CDCl<sub>3</sub>)**

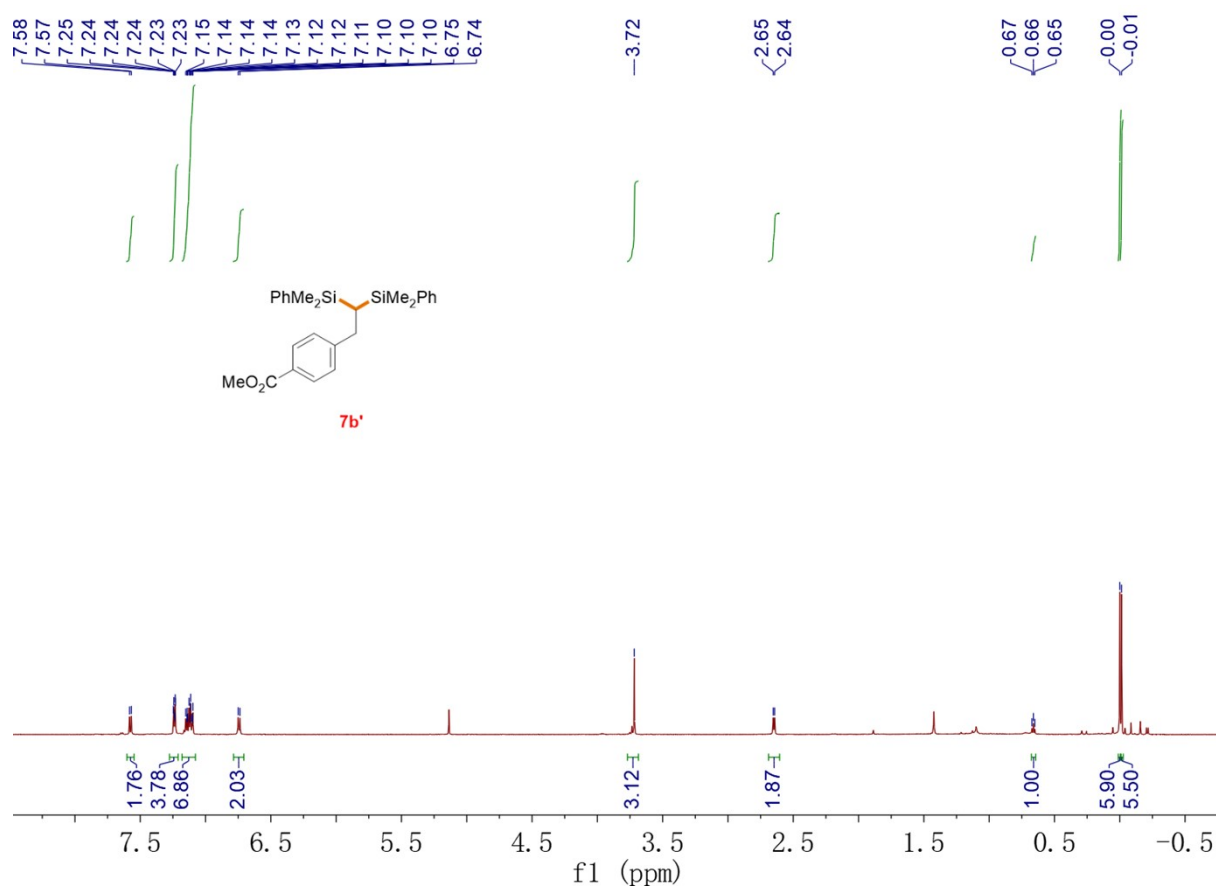

**<sup>13</sup>C NMR spectra of 7b' (100 MHz, CDCl<sub>3</sub>)**

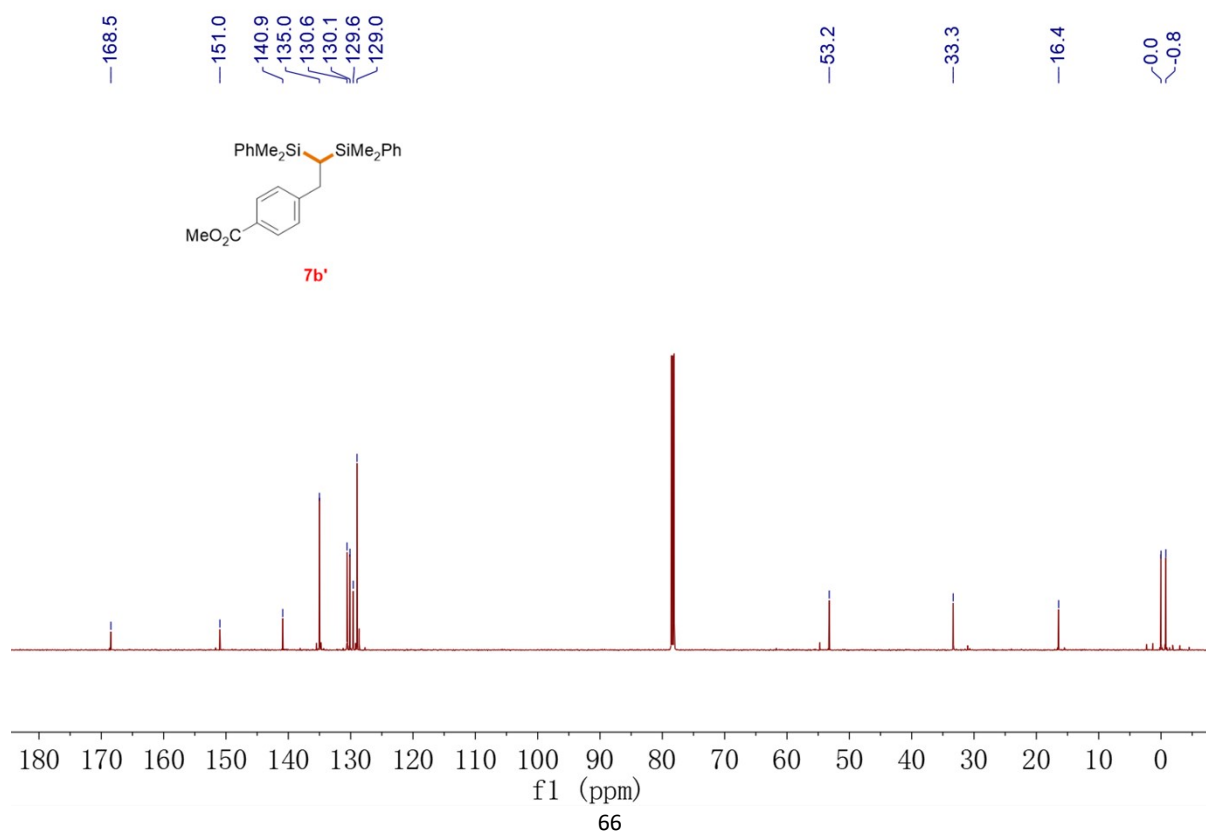

**$^1\text{H}$  NMR spectra of 9a (400 MHz,  $\text{CDCl}_3$ )**

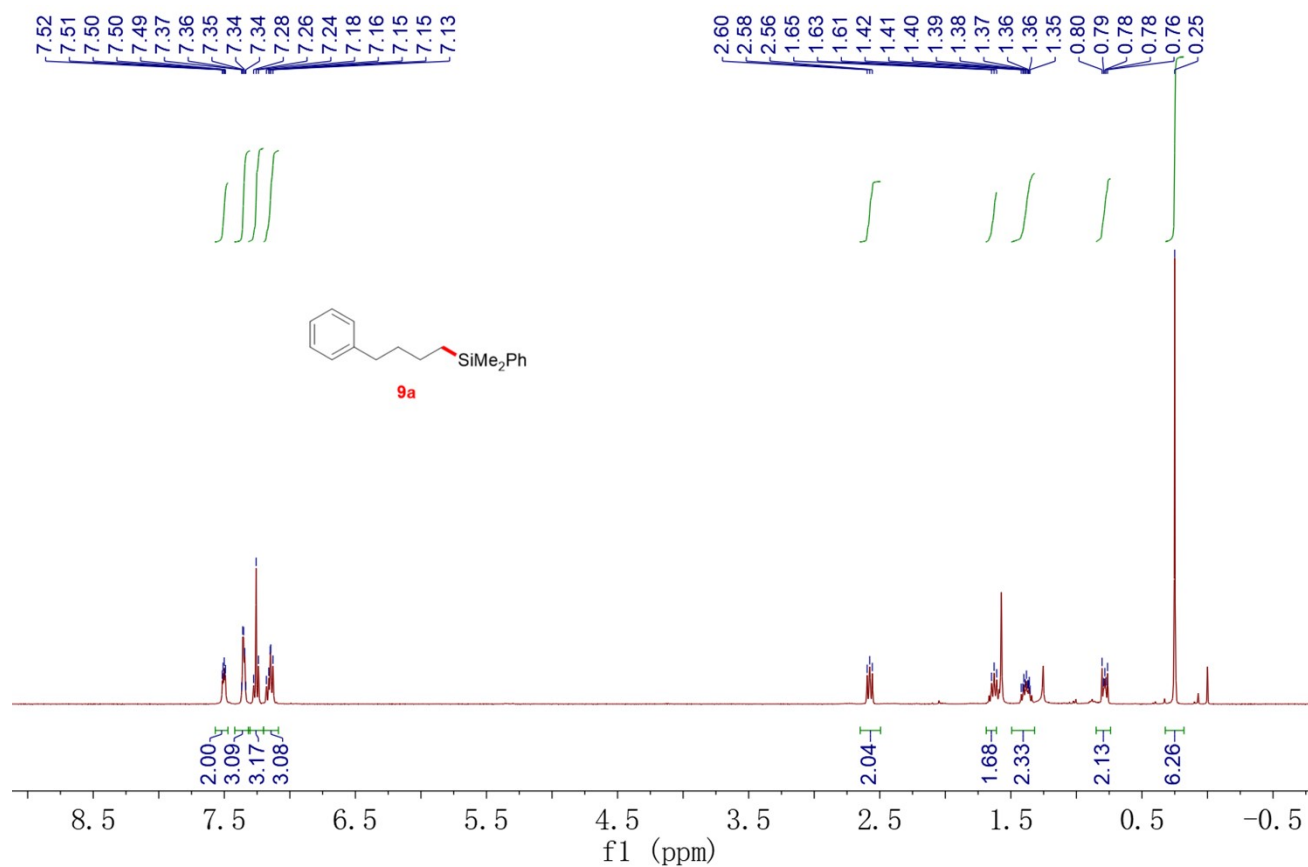

**$^{13}\text{C}$  NMR spectra of 9a (100 MHz,  $\text{CDCl}_3$ )**

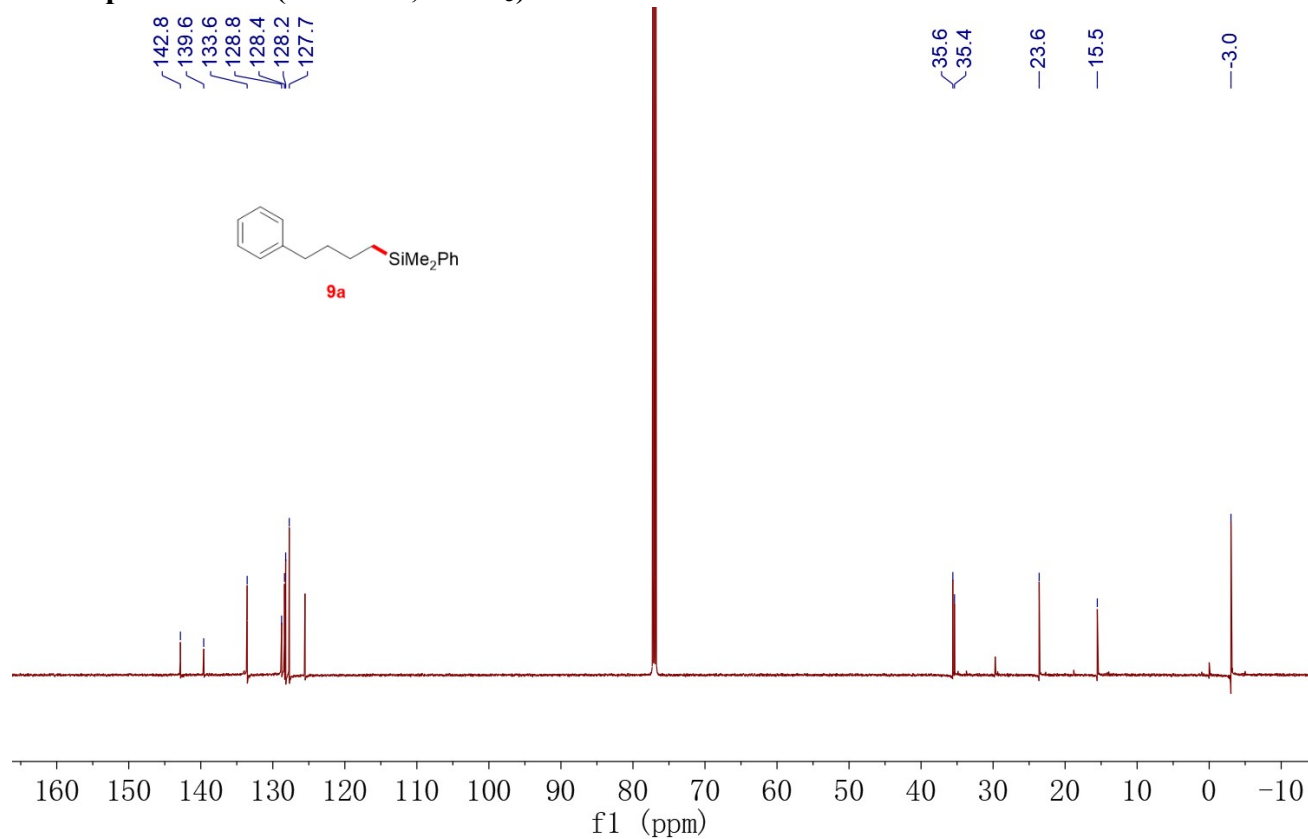

**$^1\text{H}$  NMR spectra of 9b (400 MHz,  $\text{CDCl}_3$ )**

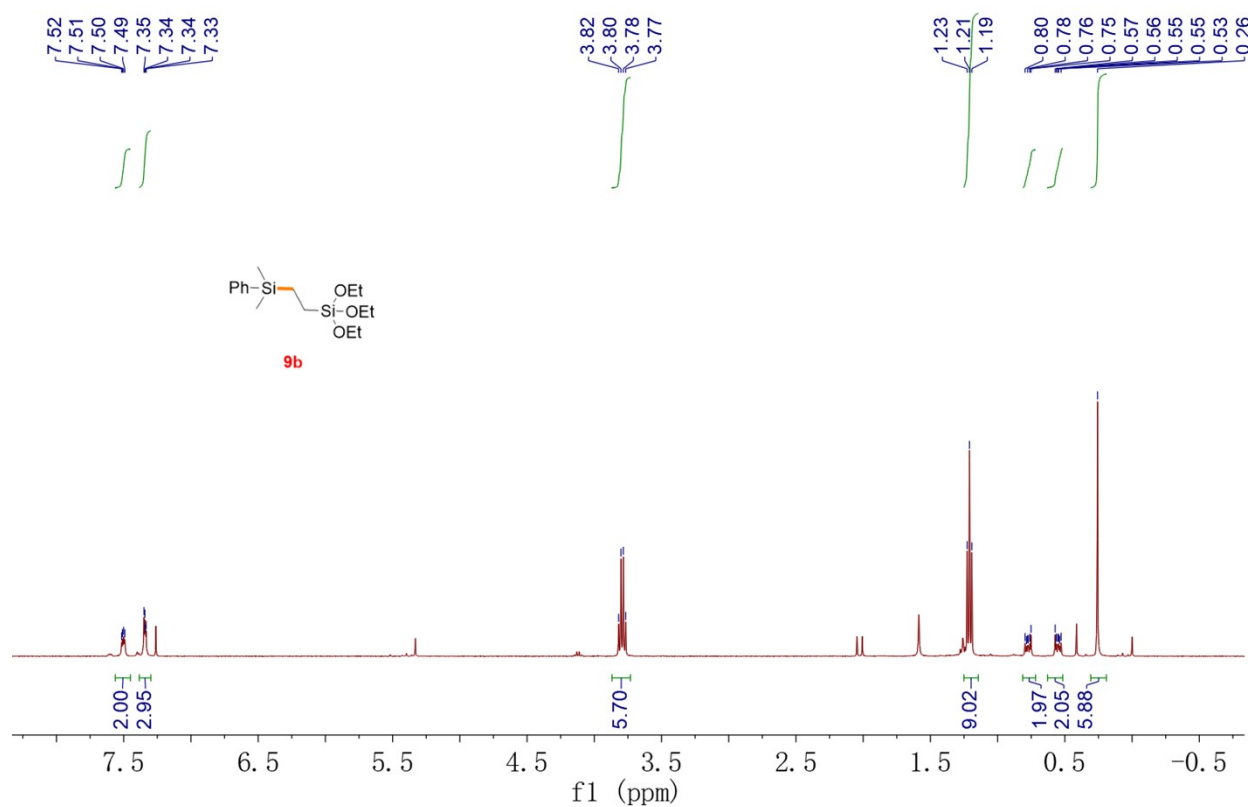

**$^1\text{H}$  NMR spectra of 9b (100 MHz,  $\text{CDCl}_3$ )**

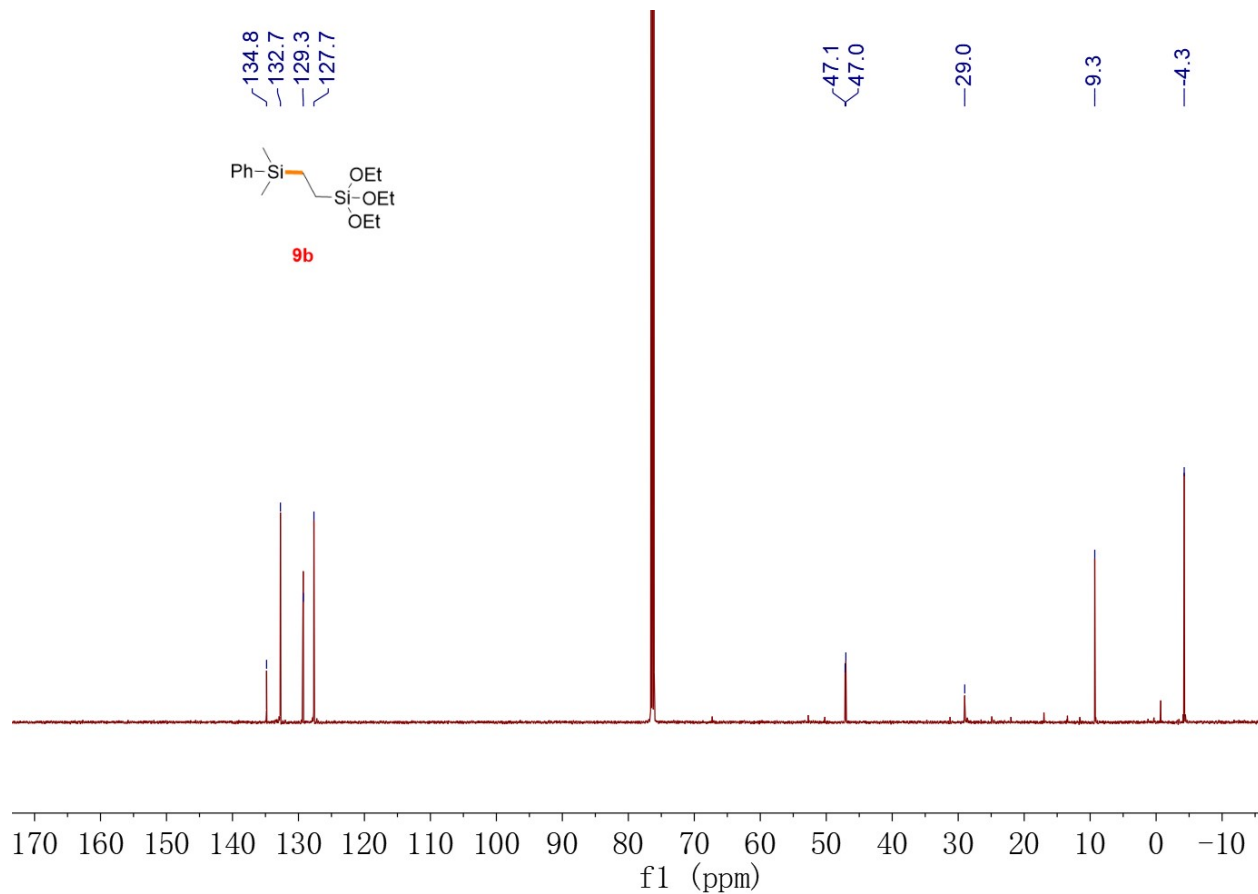

**<sup>1</sup>H NMR spectra of 9c (400 MHz, CDCl<sub>3</sub>)**

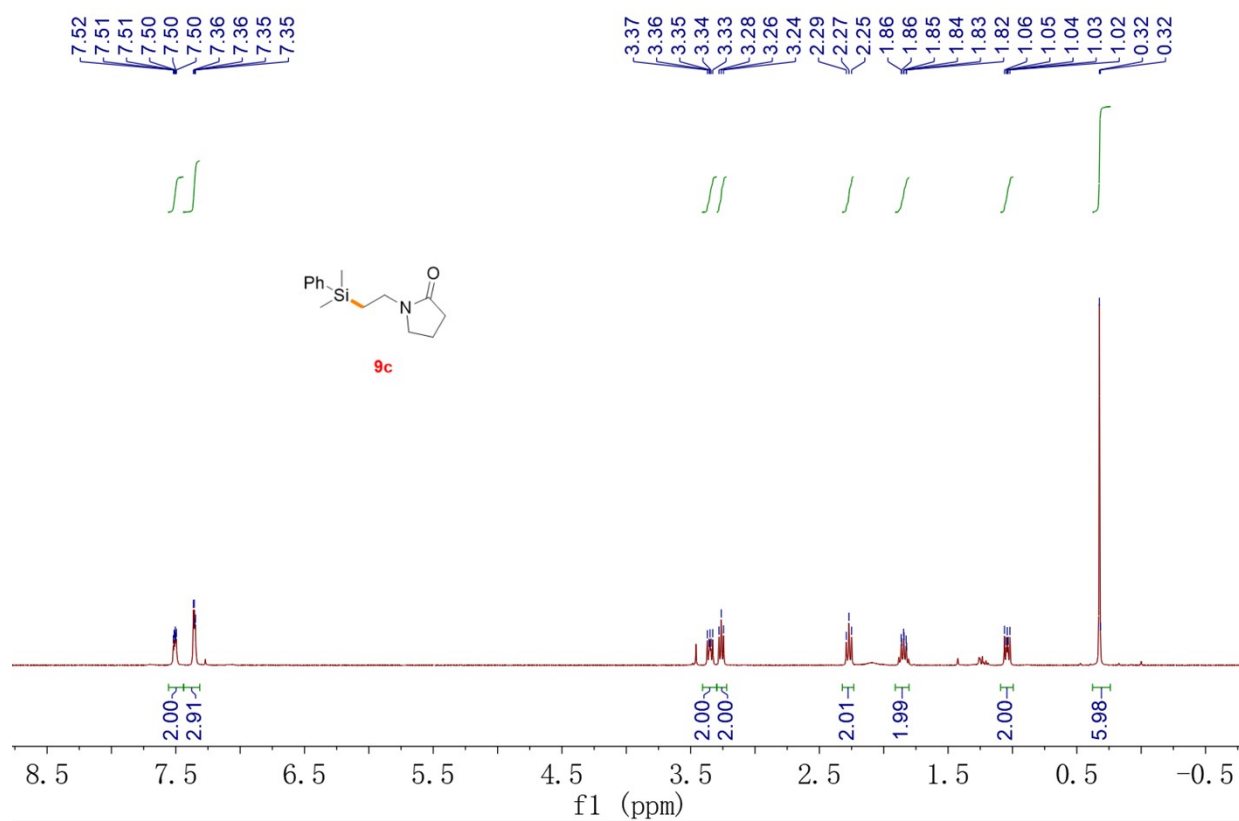

**<sup>13</sup>C NMR spectra of 9c (100 MHz, CDCl<sub>3</sub>)**

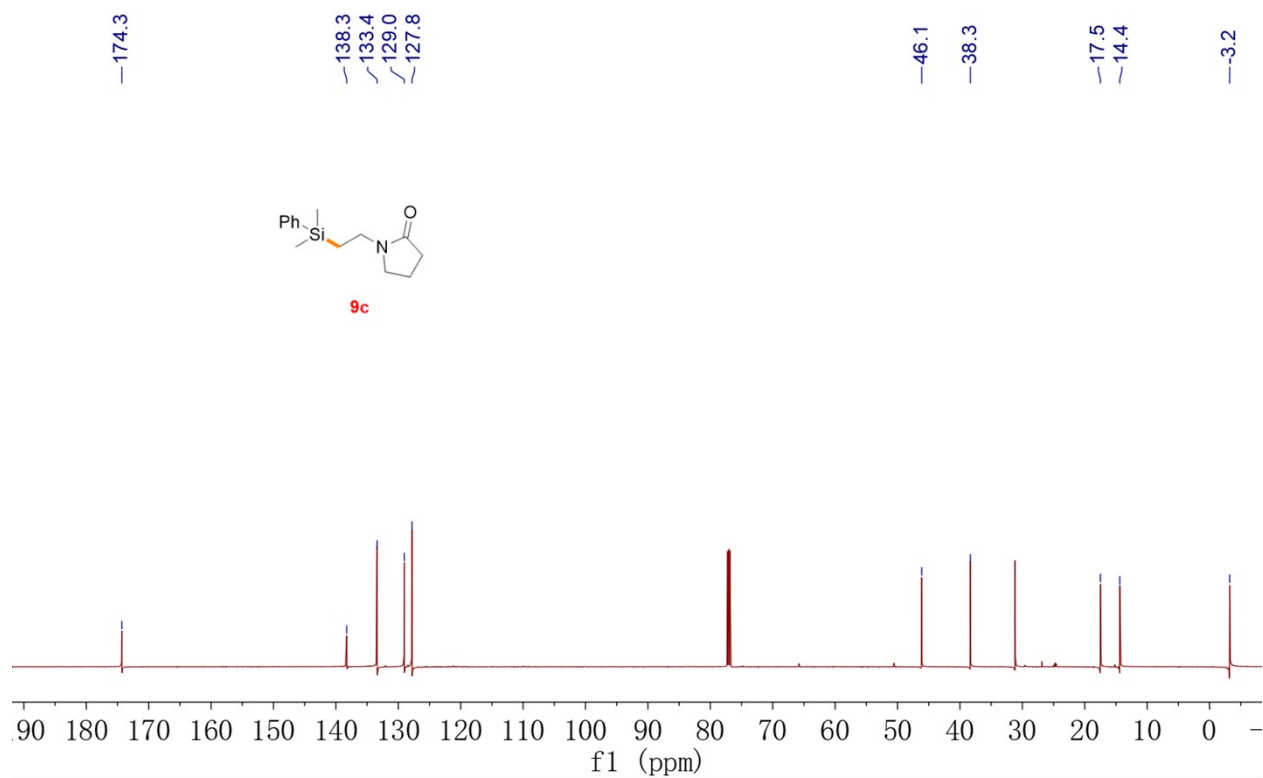

**$^1\text{H}$  NMR spectra of 9d (400 MHz,  $\text{CDCl}_3$ )**

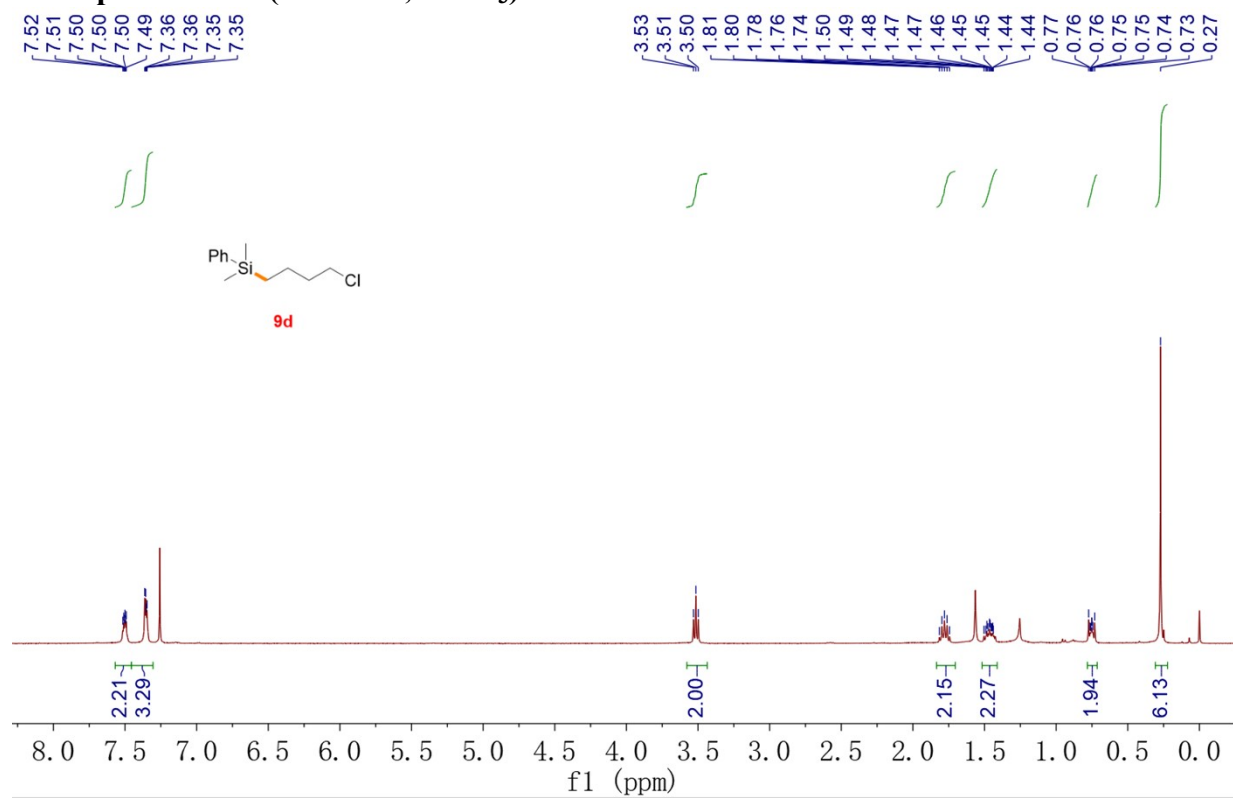

**$^{13}\text{C}$  NMR spectra of 9d (100 MHz,  $\text{CDCl}_3$ )**

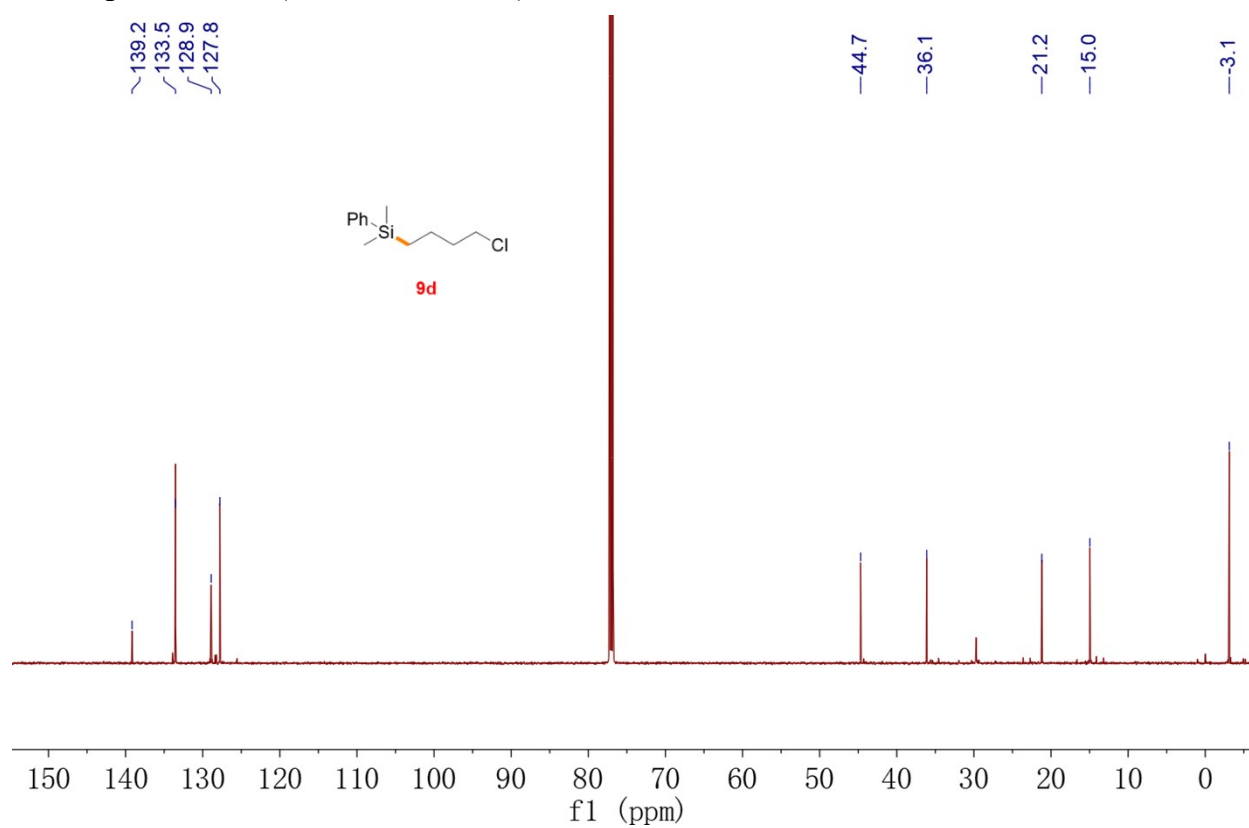

**$^1\text{H}$  NMR spectra of 9e (400 MHz,  $\text{CDCl}_3$ )**

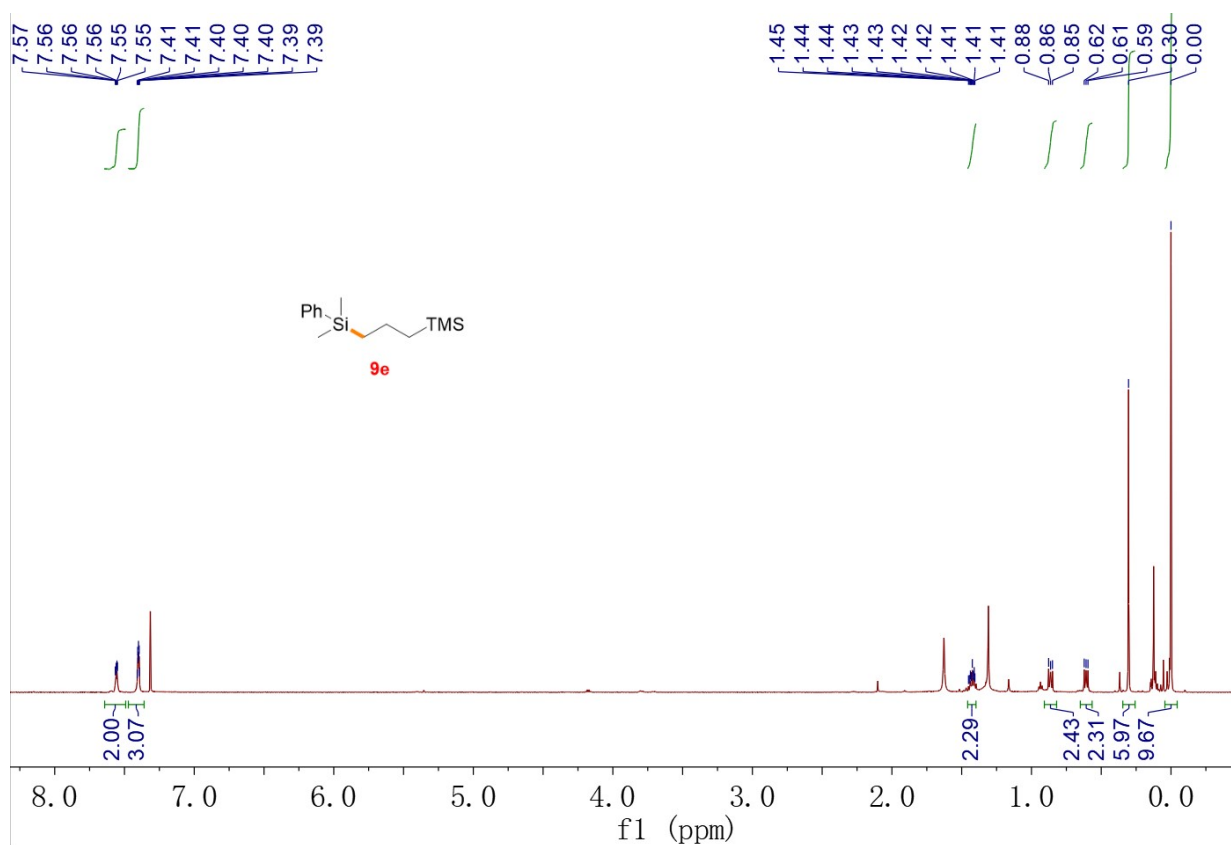

**$^{13}\text{C}$  NMR spectra of 9e (100 MHz,  $\text{CDCl}_3$ )**

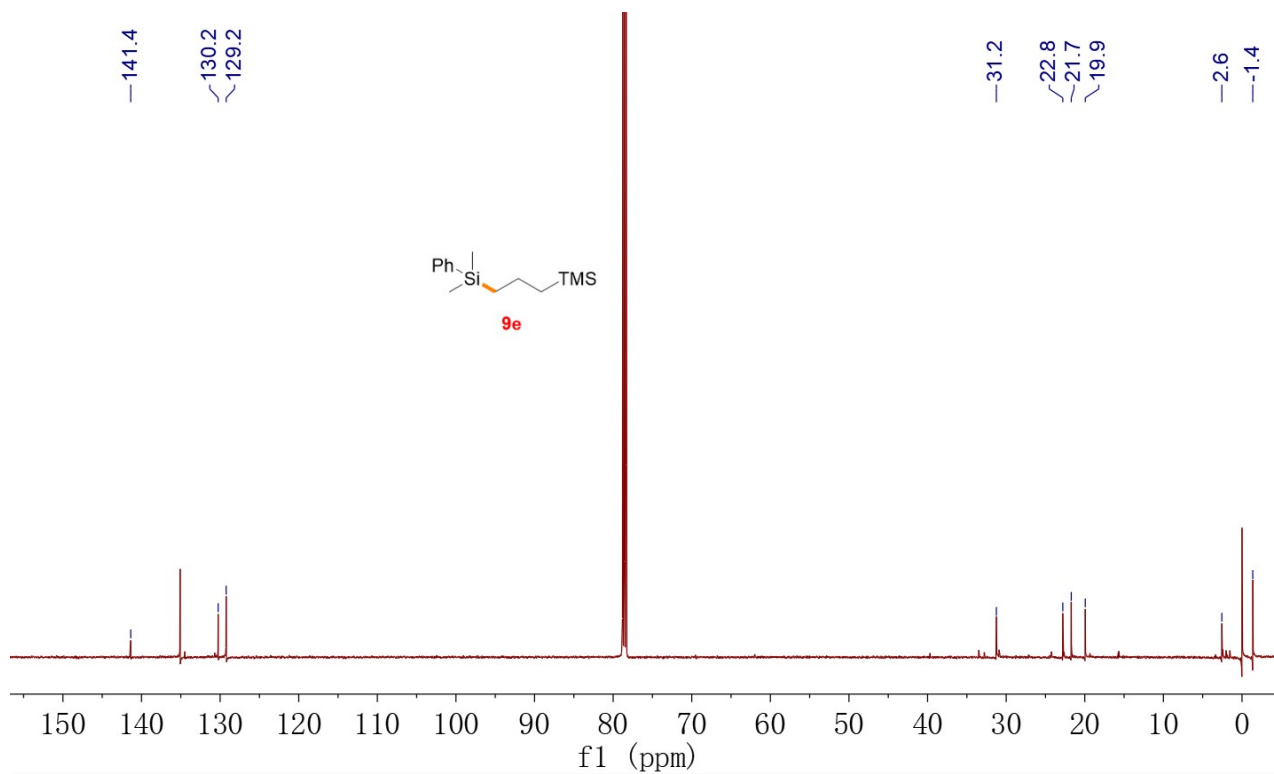

**<sup>1</sup>H NMR spectra of 11a (400 MHz, CDCl<sub>3</sub>)**

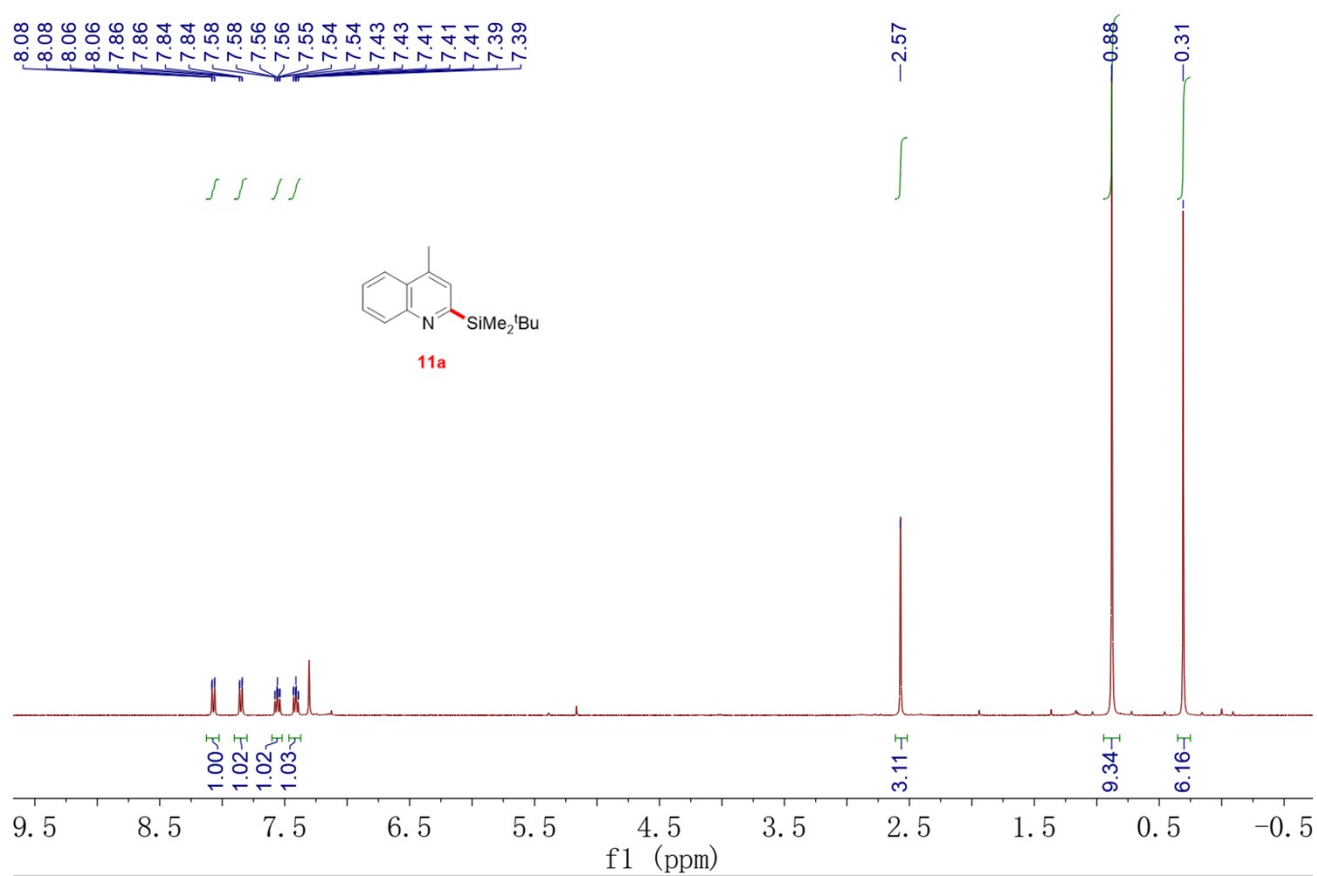

**<sup>13</sup>C NMR spectra of 11a (100 MHz, CDCl<sub>3</sub>)**

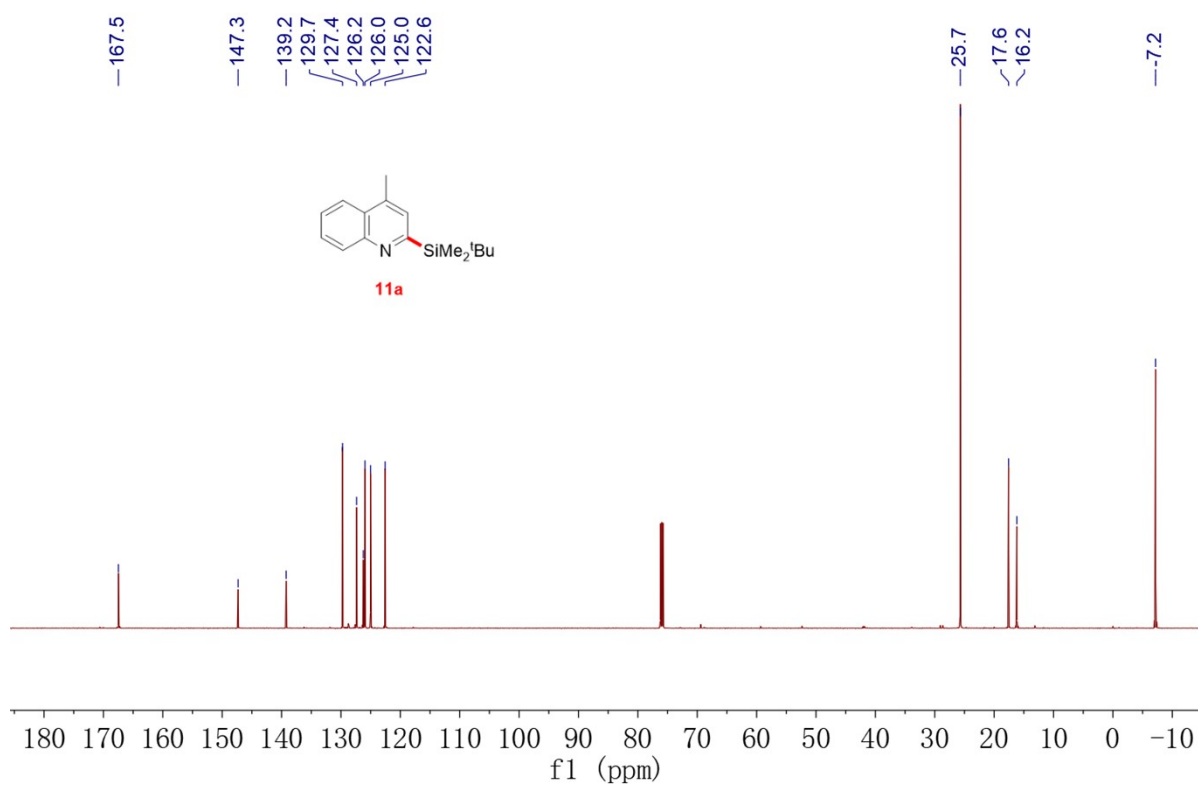

**$^1\text{H}$  NMR spectra of 11b (400 MHz,  $\text{CDCl}_3$ )**

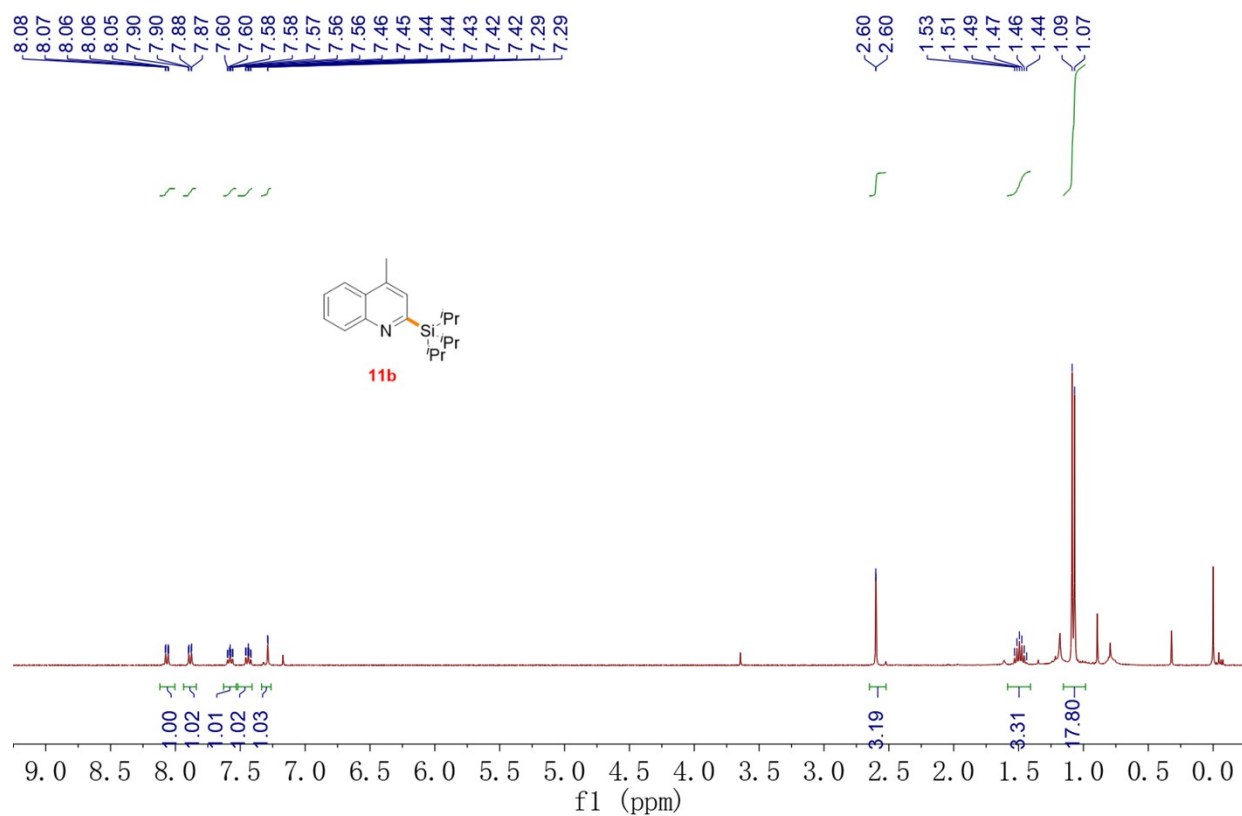

**$^{13}\text{C}$  NMR spectra of 11b (100 MHz,  $\text{CDCl}_3$ )**

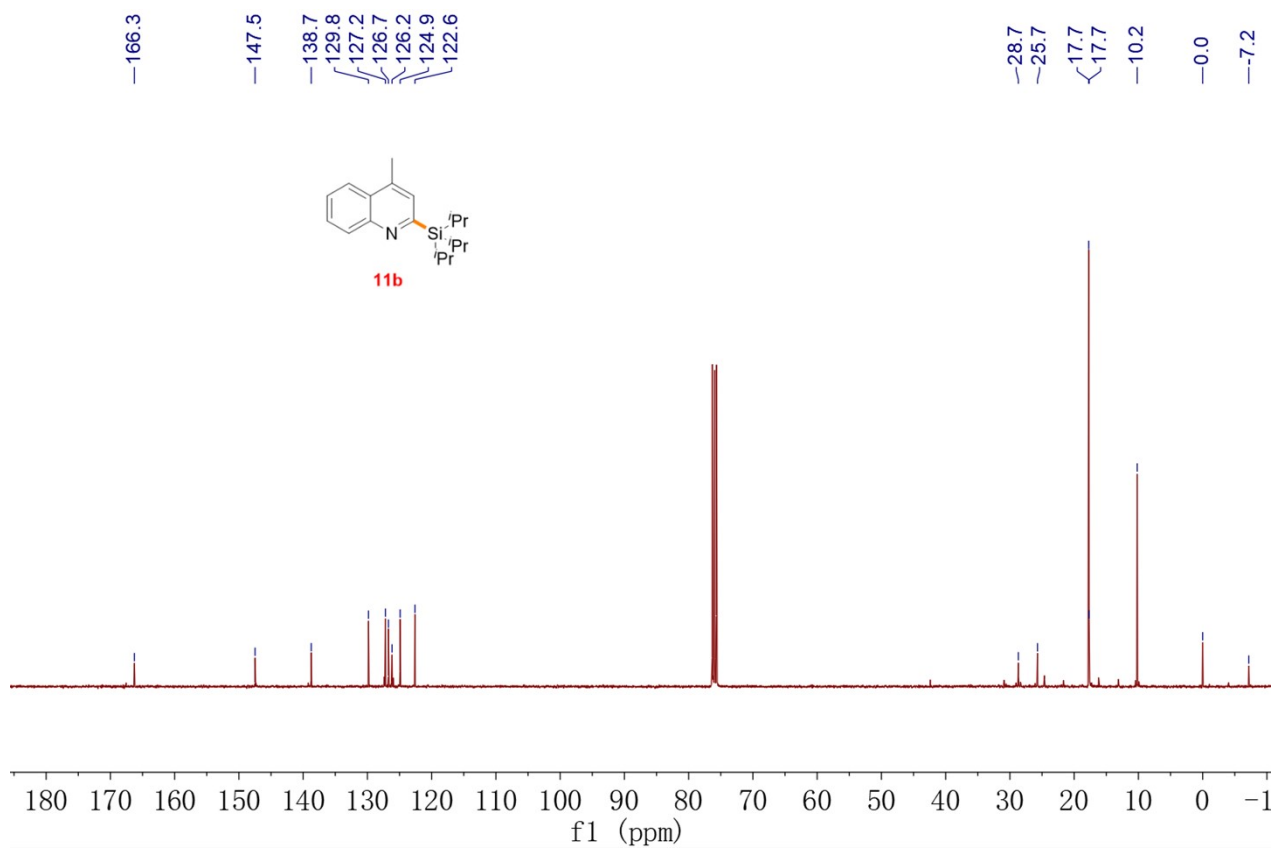

**<sup>1</sup>H NMR spectra of 11c (400 MHz, CDCl<sub>3</sub>)**

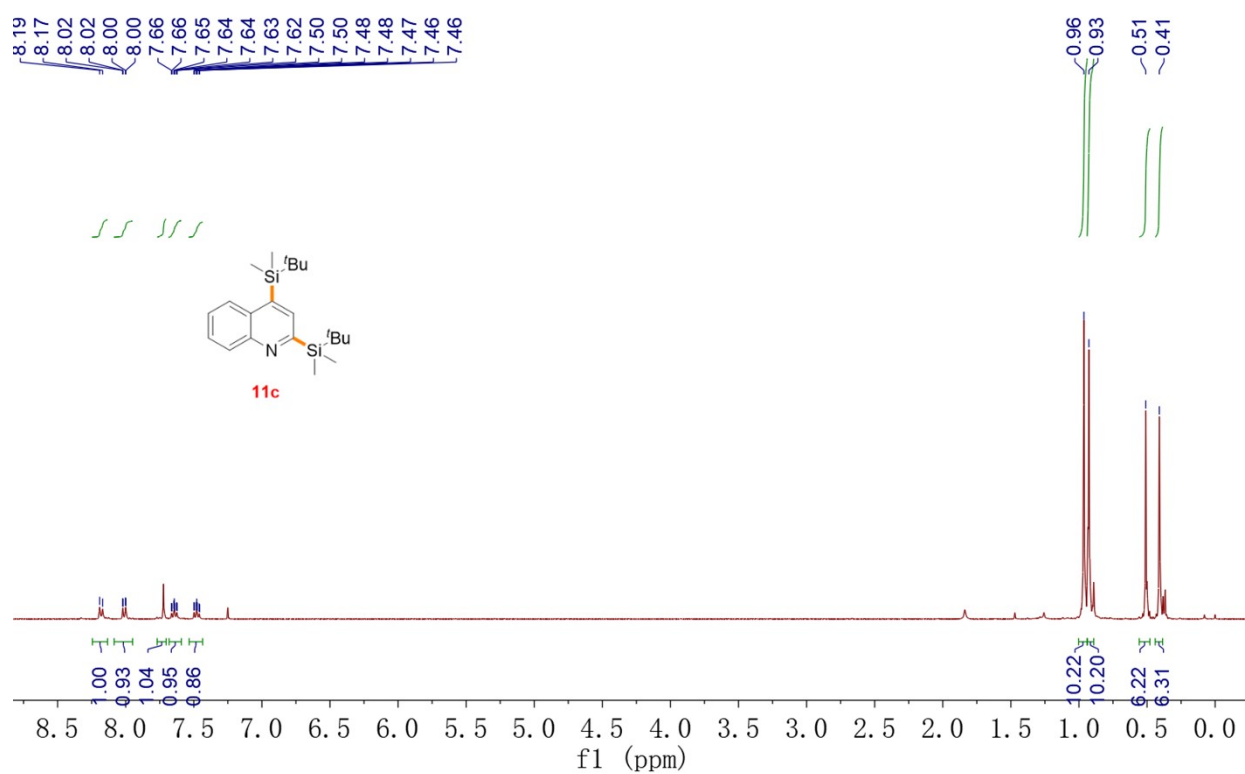

**<sup>13</sup>C NMR spectra of 11c (100 MHz, CDCl<sub>3</sub>)**

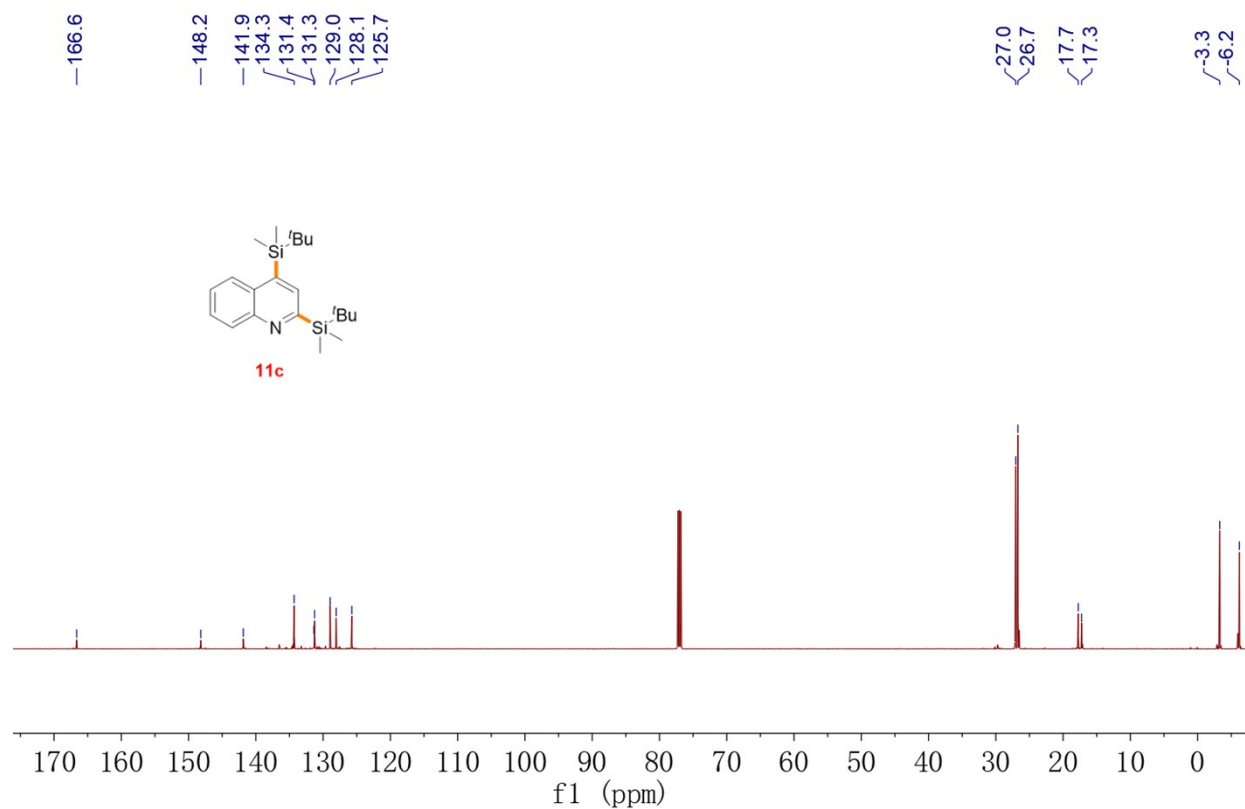

**$^1\text{H}$  NMR spectra of 11d (400 MHz,  $\text{CDCl}_3$ )**

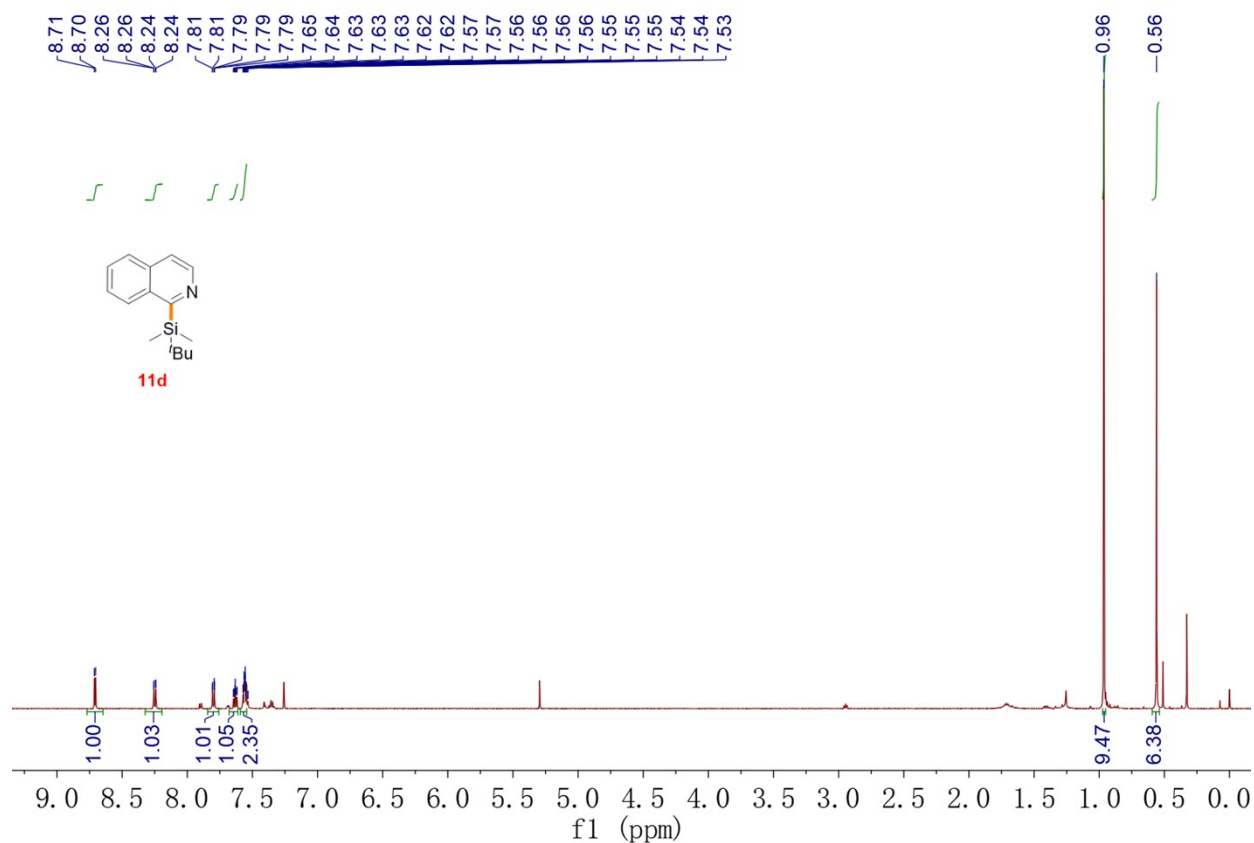

**$^{13}\text{C}$  NMR spectra of 11d (100 MHz,  $\text{CDCl}_3$ )**

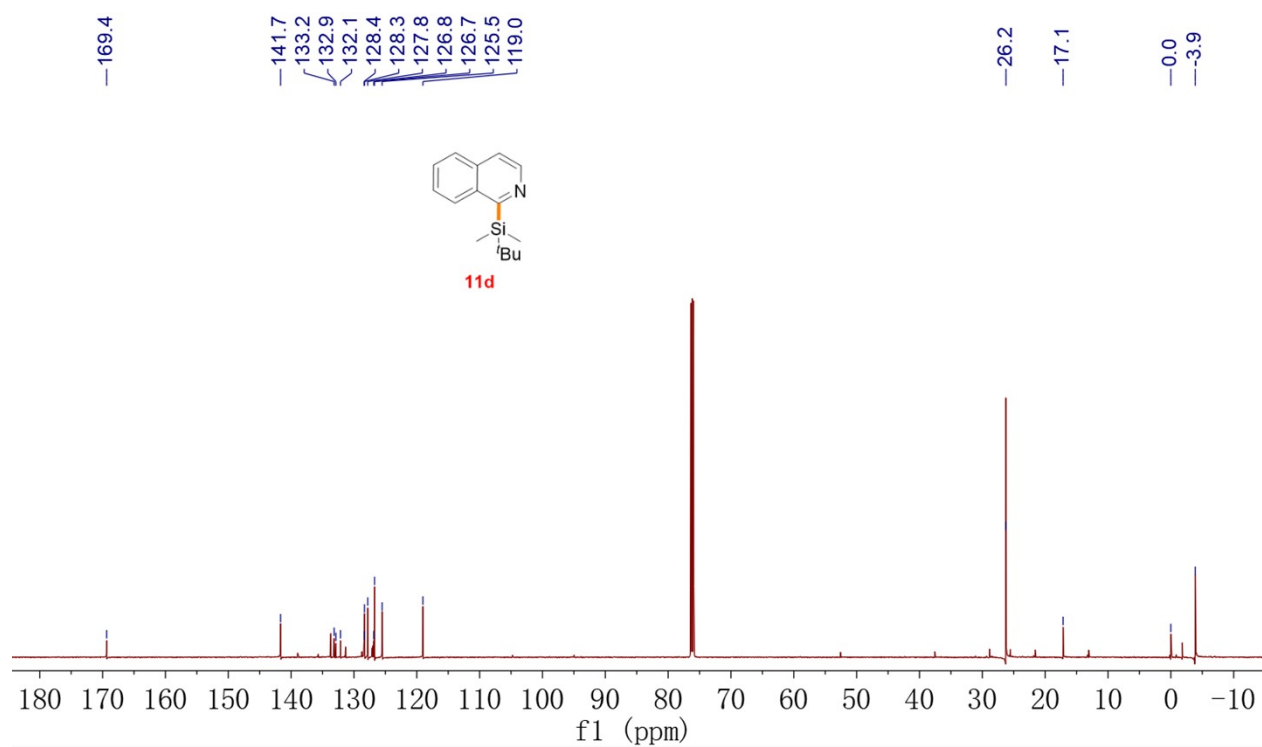

**<sup>1</sup>H NMR spectra of 11e (400 MHz, CDCl<sub>3</sub>)**

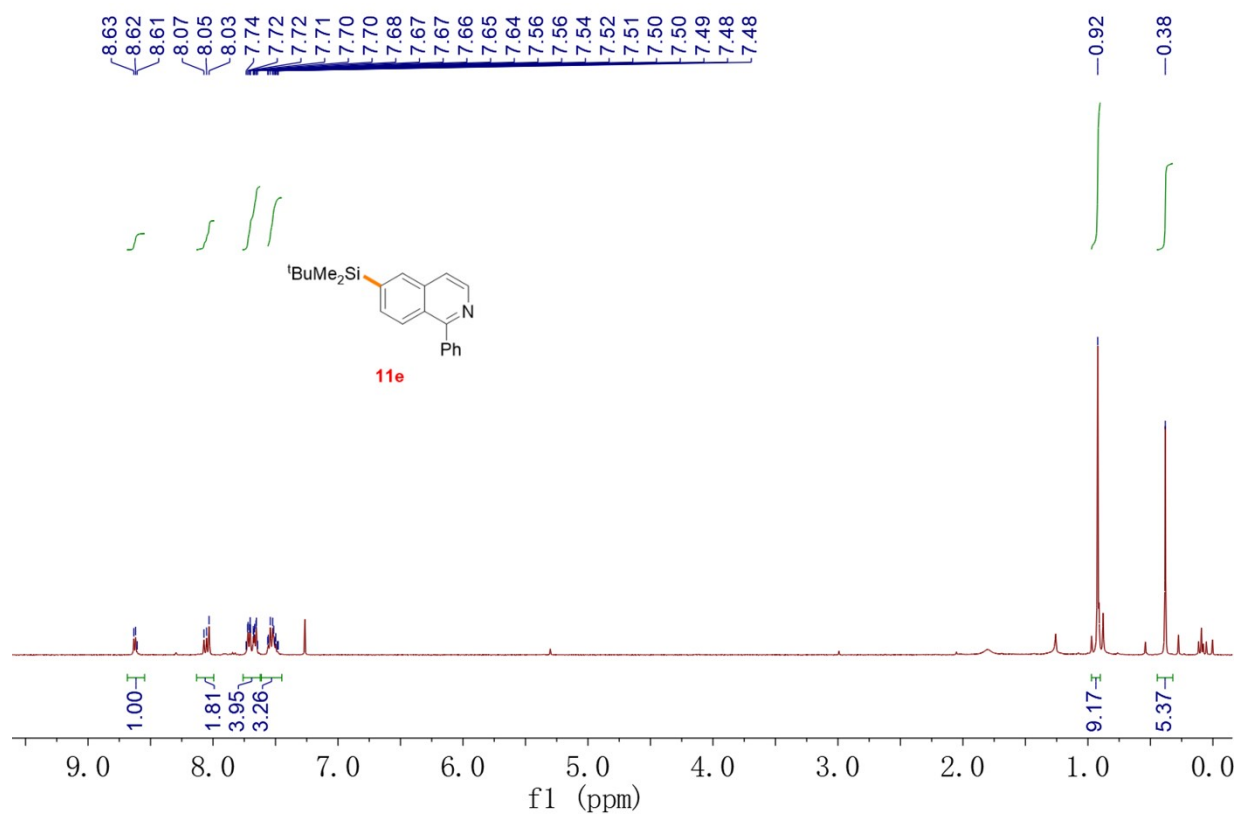

**<sup>13</sup>C NMR spectra of 11e (100 MHz, CDCl<sub>3</sub>)**

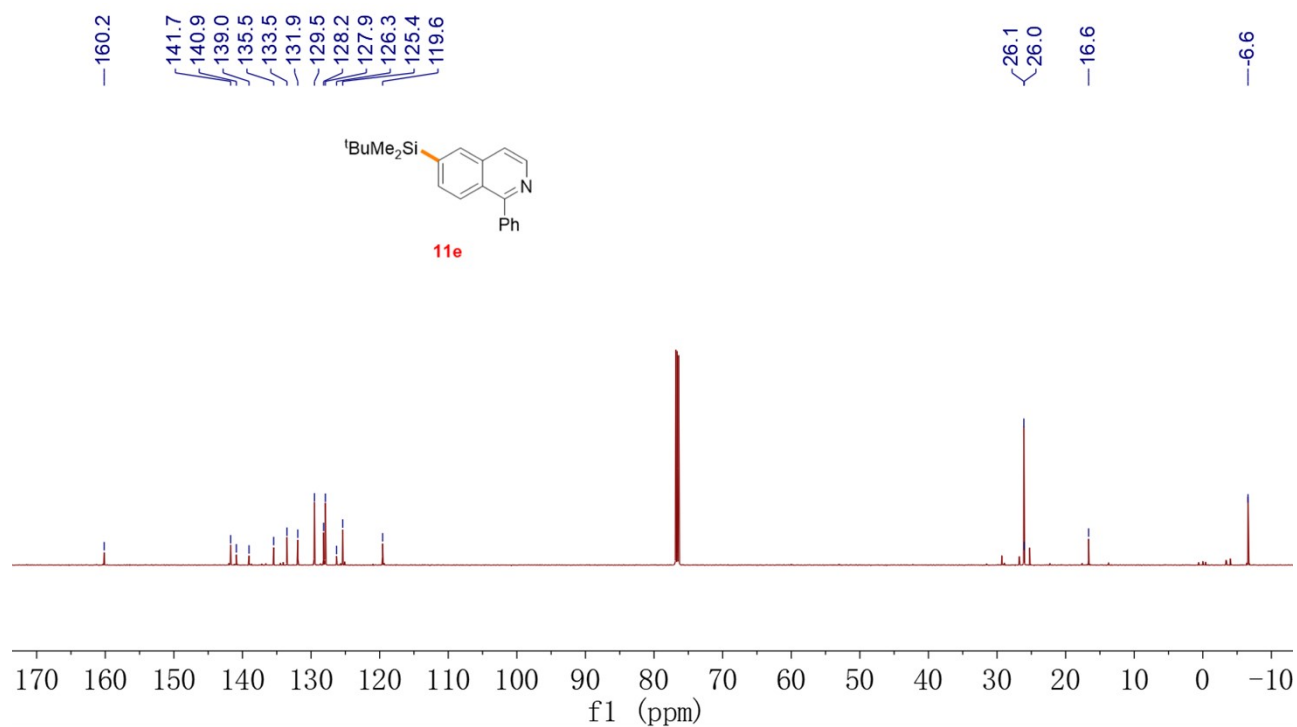

**<sup>1</sup>H NMR spectra of 11f (400 MHz, CDCl<sub>3</sub>)**

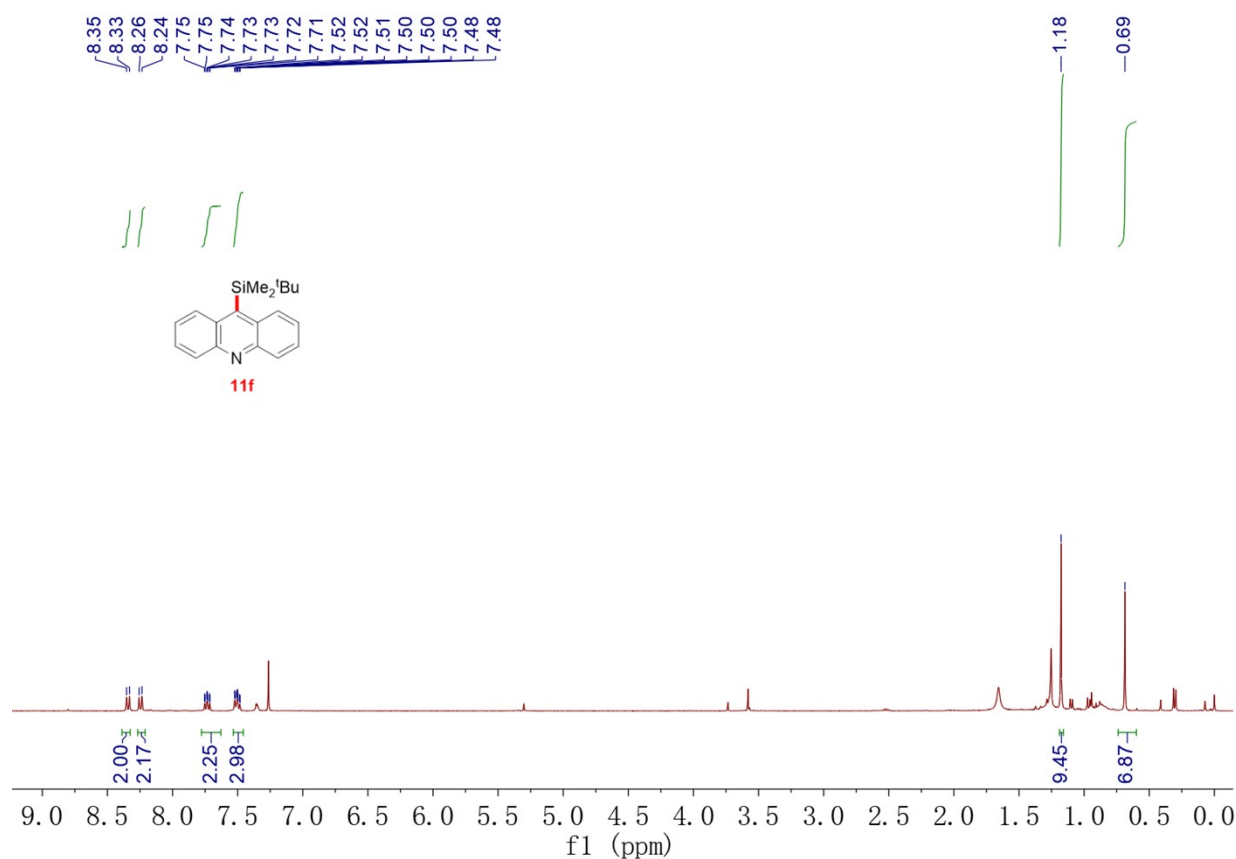

**<sup>13</sup>C NMR spectra of 11f (100 MHz, CDCl<sub>3</sub>)**

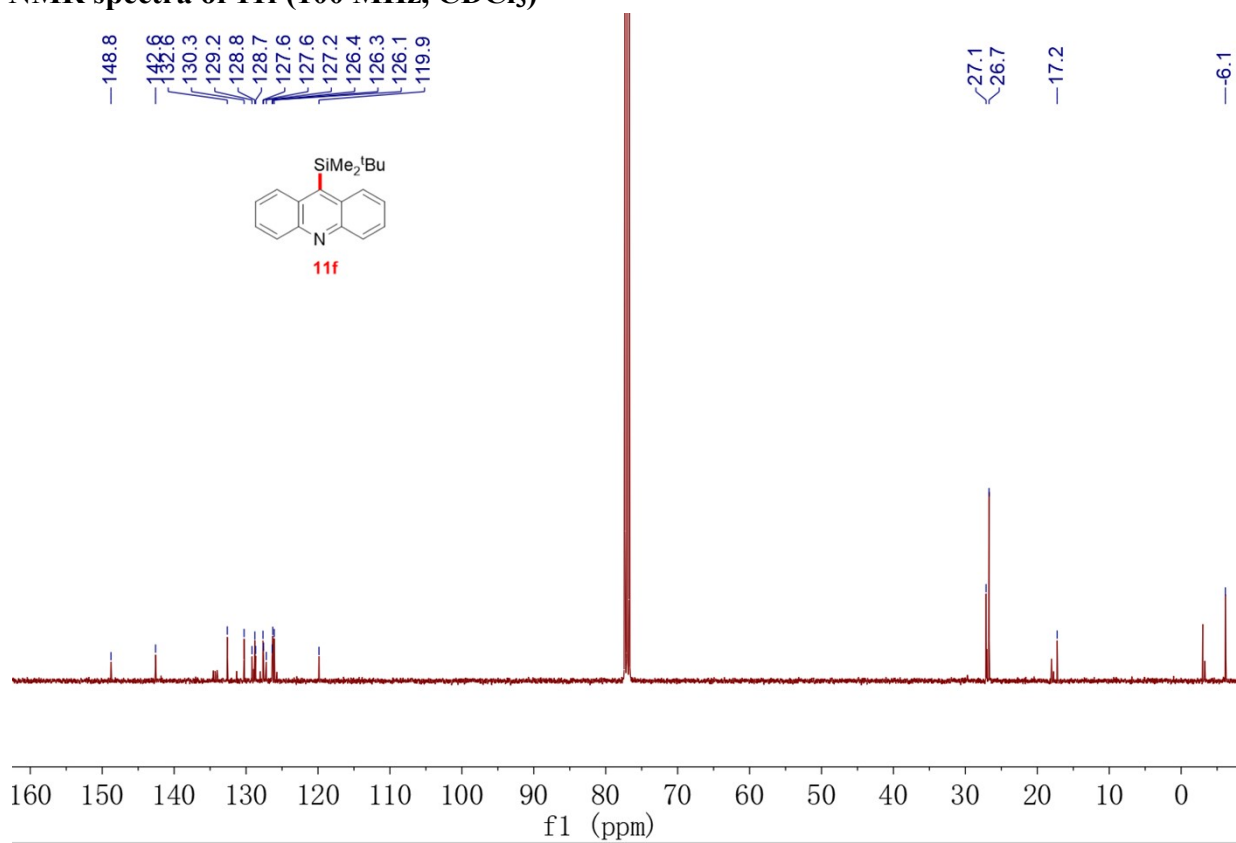

**$^1\text{H}$  NMR spectra of 11g (400 MHz,  $\text{CDCl}_3$ )**

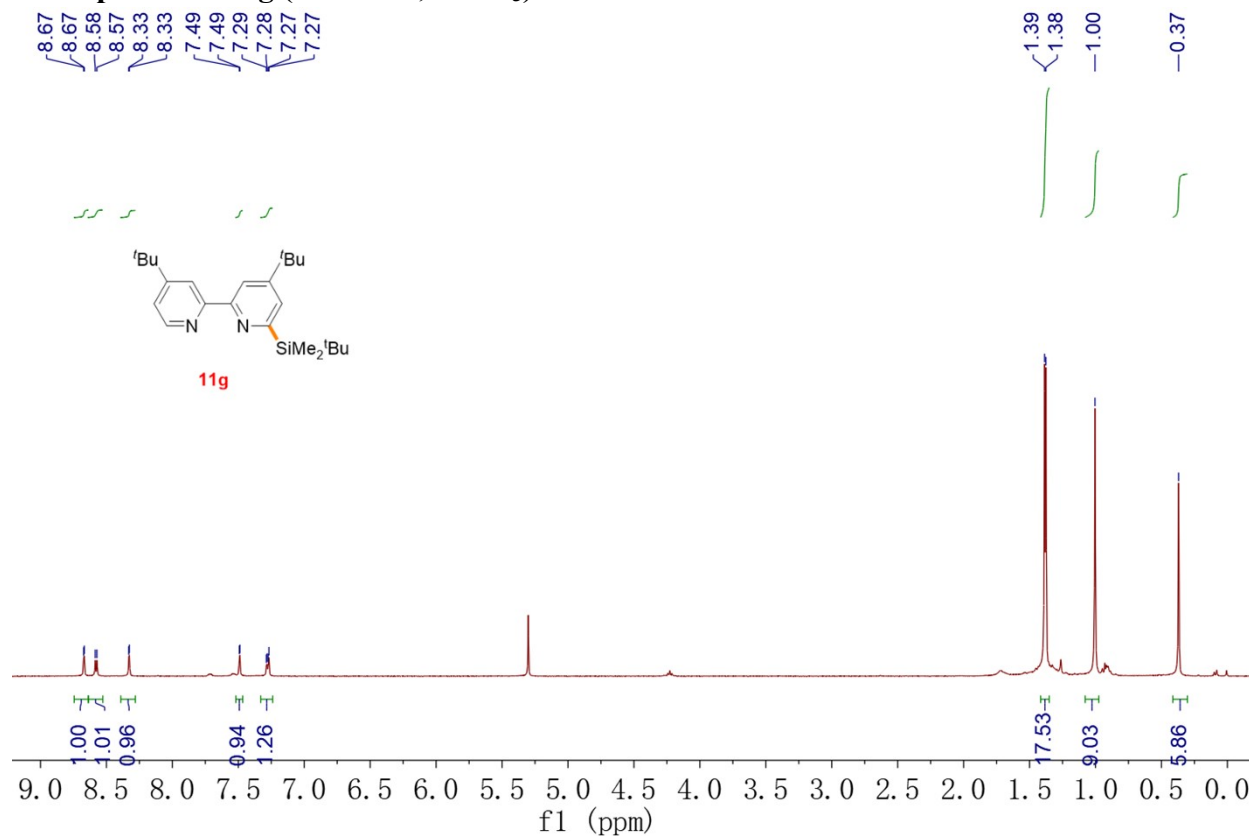

**$^{13}\text{C}$  NMR spectra of 11g (100 MHz,  $\text{CDCl}_3$ )**

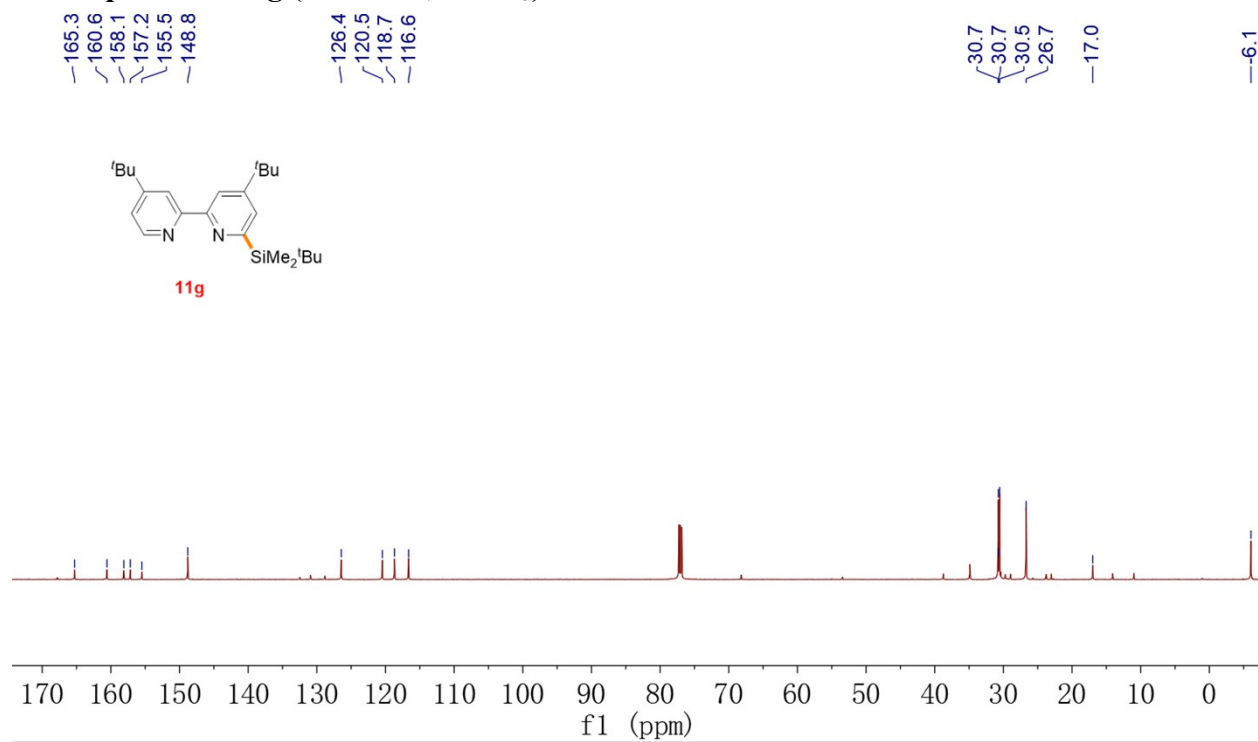

**<sup>1</sup>H NMR spectra of 11h (400 MHz, CDCl<sub>3</sub>)**

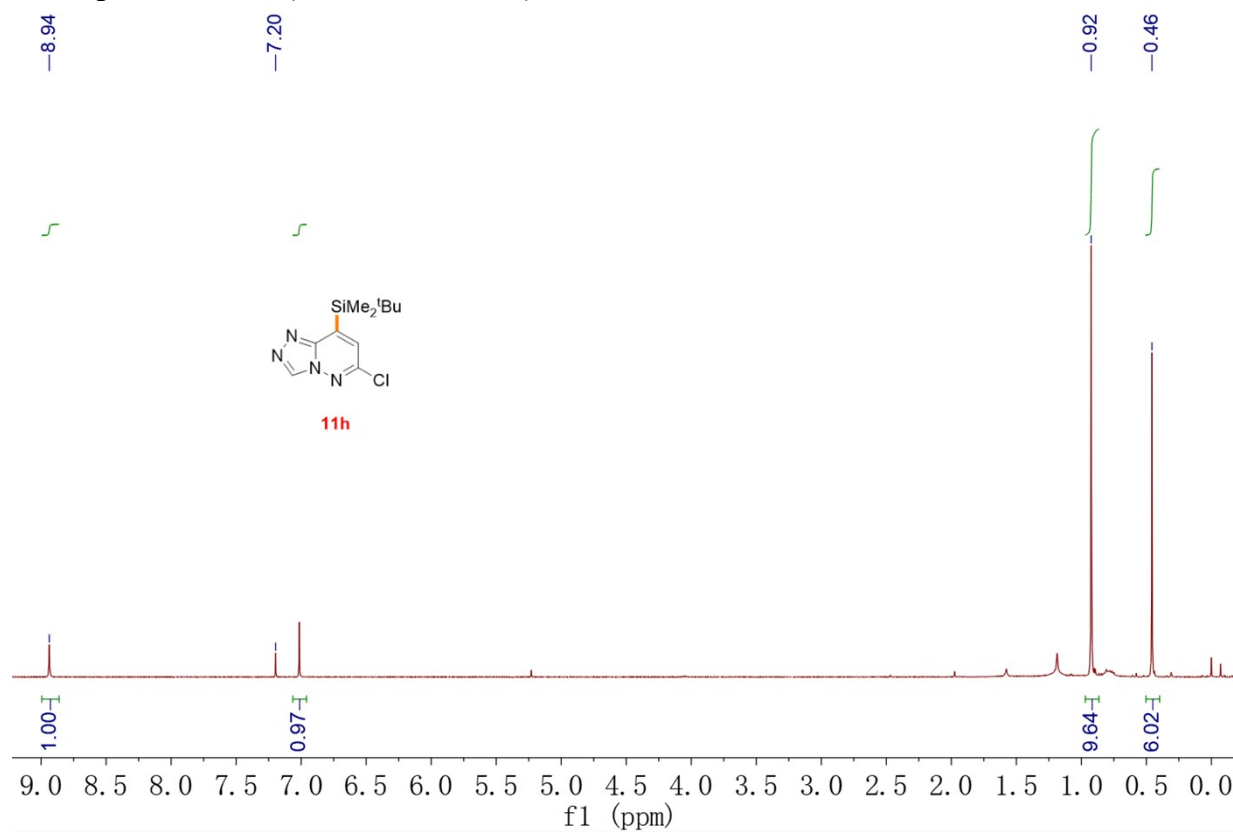

**<sup>13</sup>C NMR spectra of 11h (100 MHz, CDCl<sub>3</sub>)**

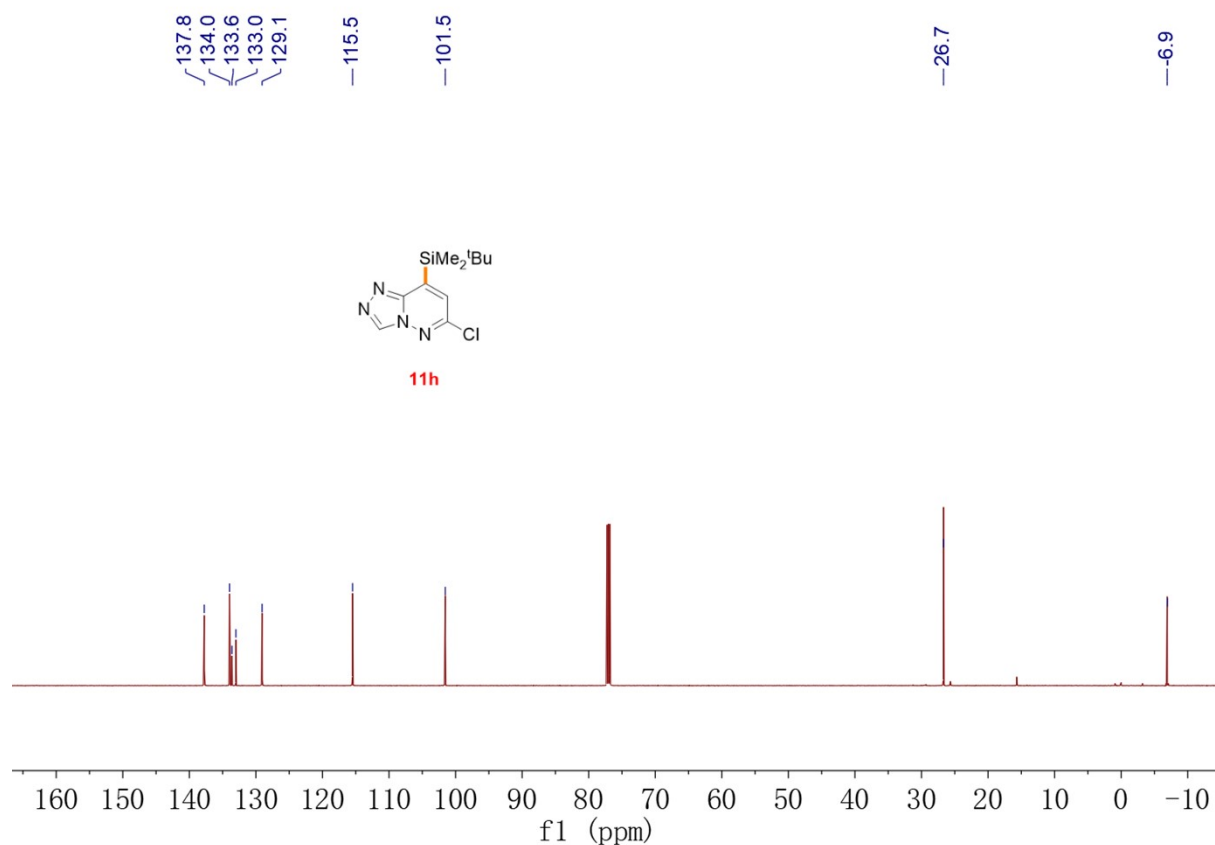

**<sup>1</sup>H NMR spectra of 11i (400 MHz, CDCl<sub>3</sub>)**

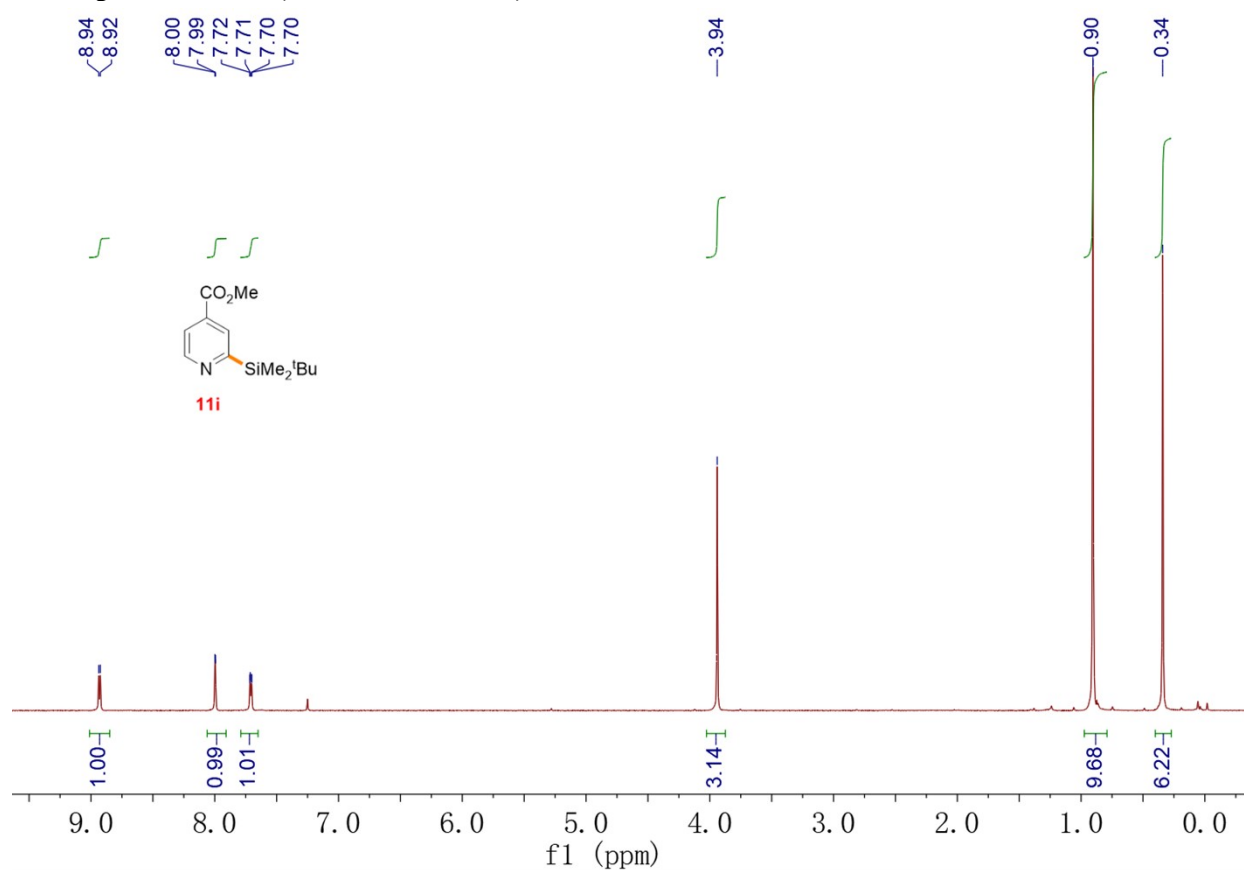

**<sup>13</sup>C NMR spectra of 11i (100 MHz, CDCl<sub>3</sub>)**

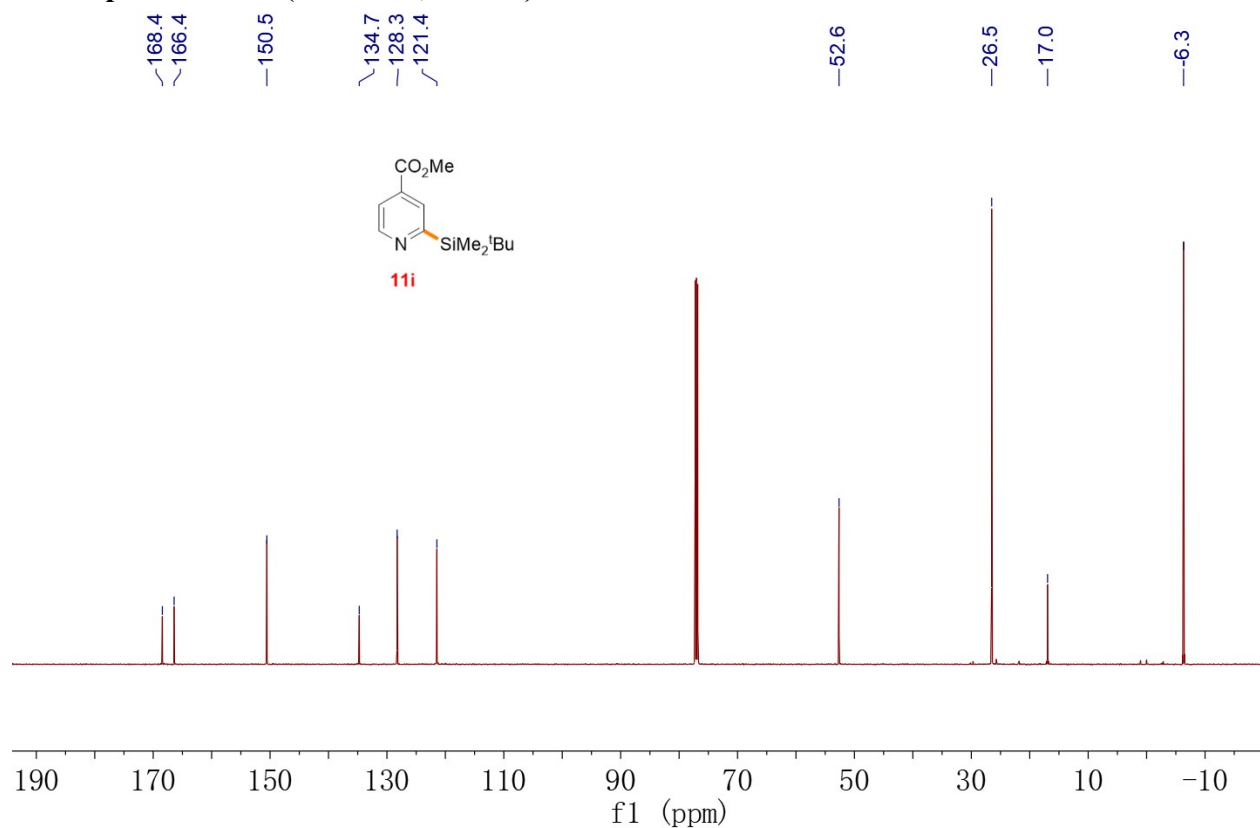

**$^1\text{H}$  NMR spectra of 11j (400 MHz,  $\text{CDCl}_3$ )**

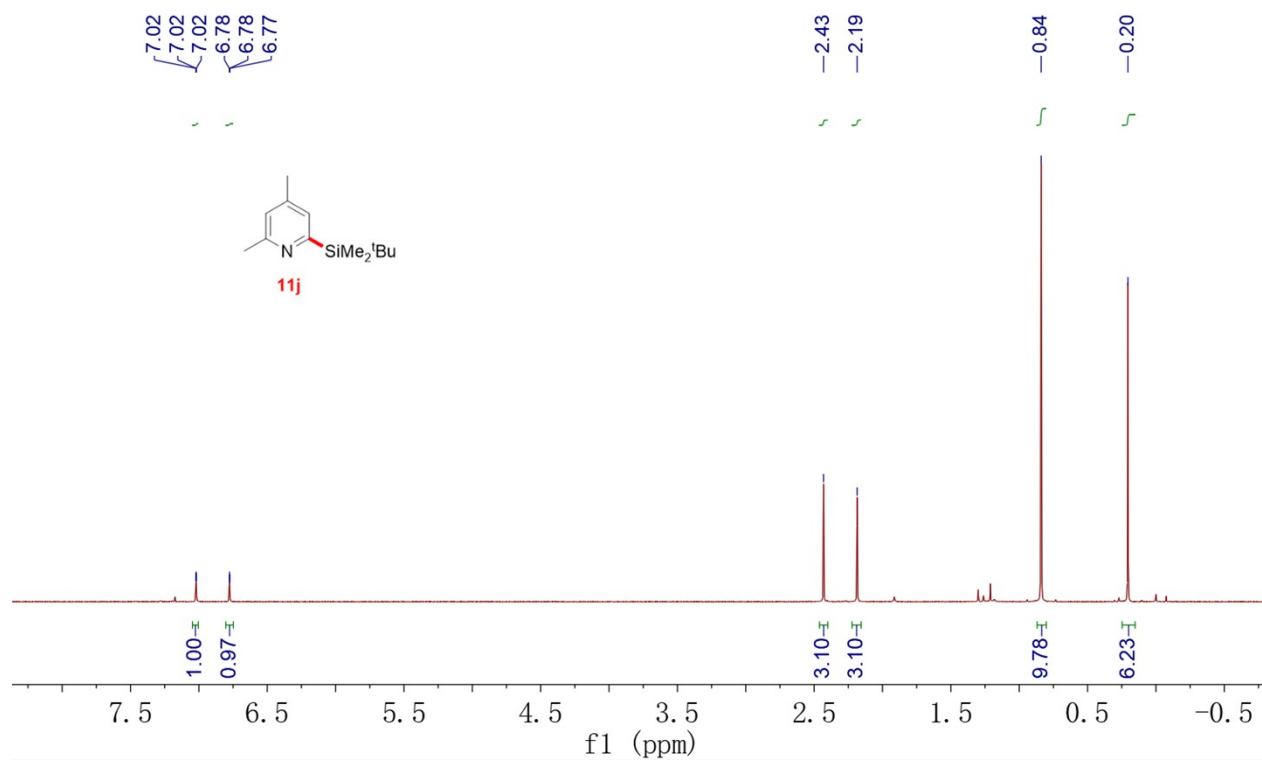

**$^{13}\text{C}$  NMR spectra of 11j (100 MHz,  $\text{CDCl}_3$ )**

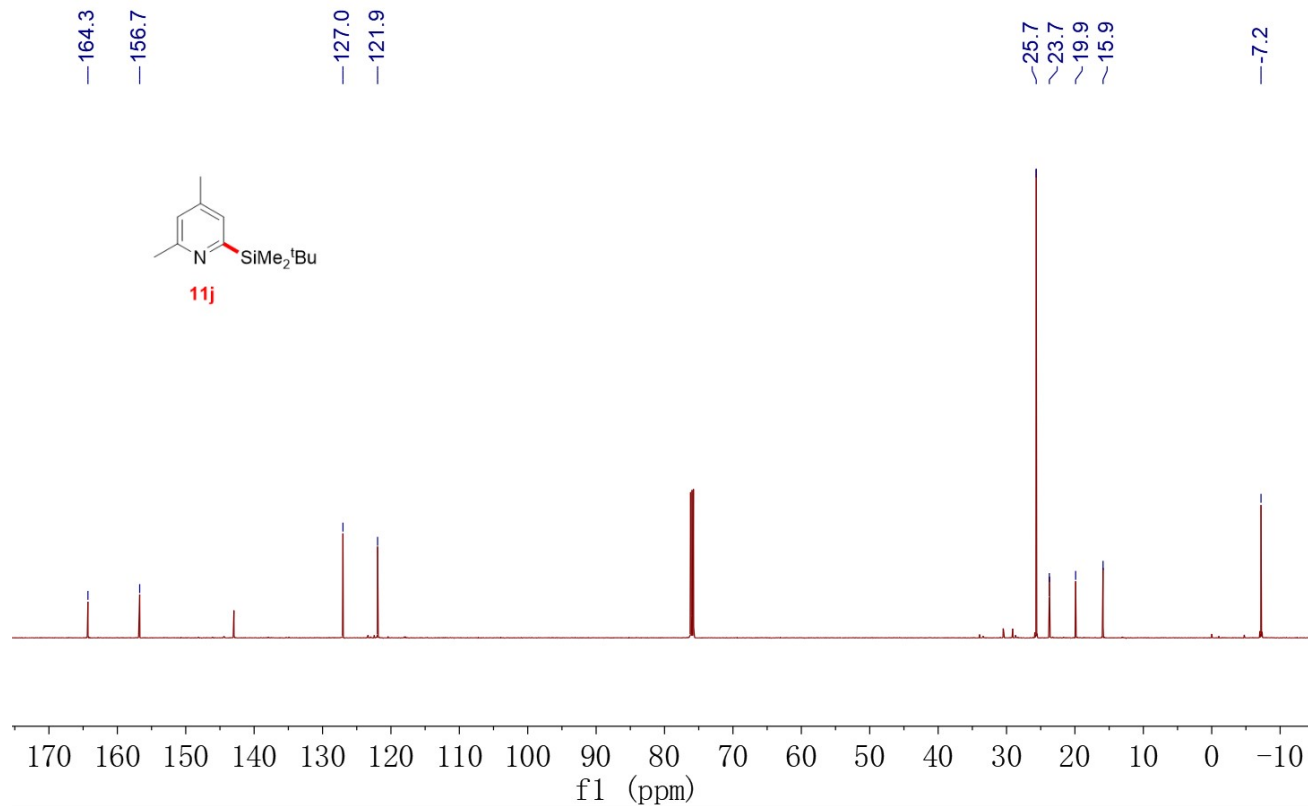

**<sup>1</sup>H NMR spectra of 11k (400 MHz, CDCl<sub>3</sub>)**

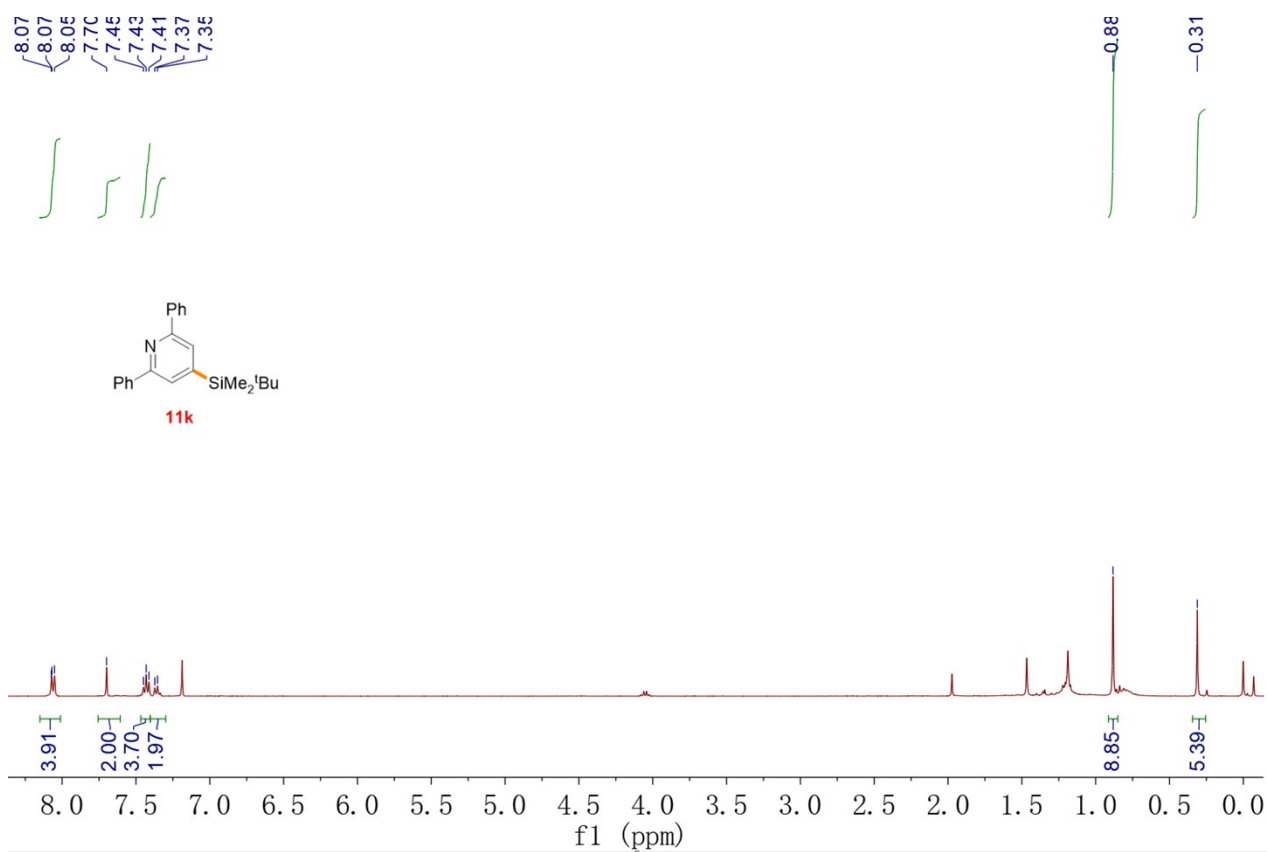

**<sup>13</sup>C NMR spectra of 11k (100 MHz, CDCl<sub>3</sub>)**

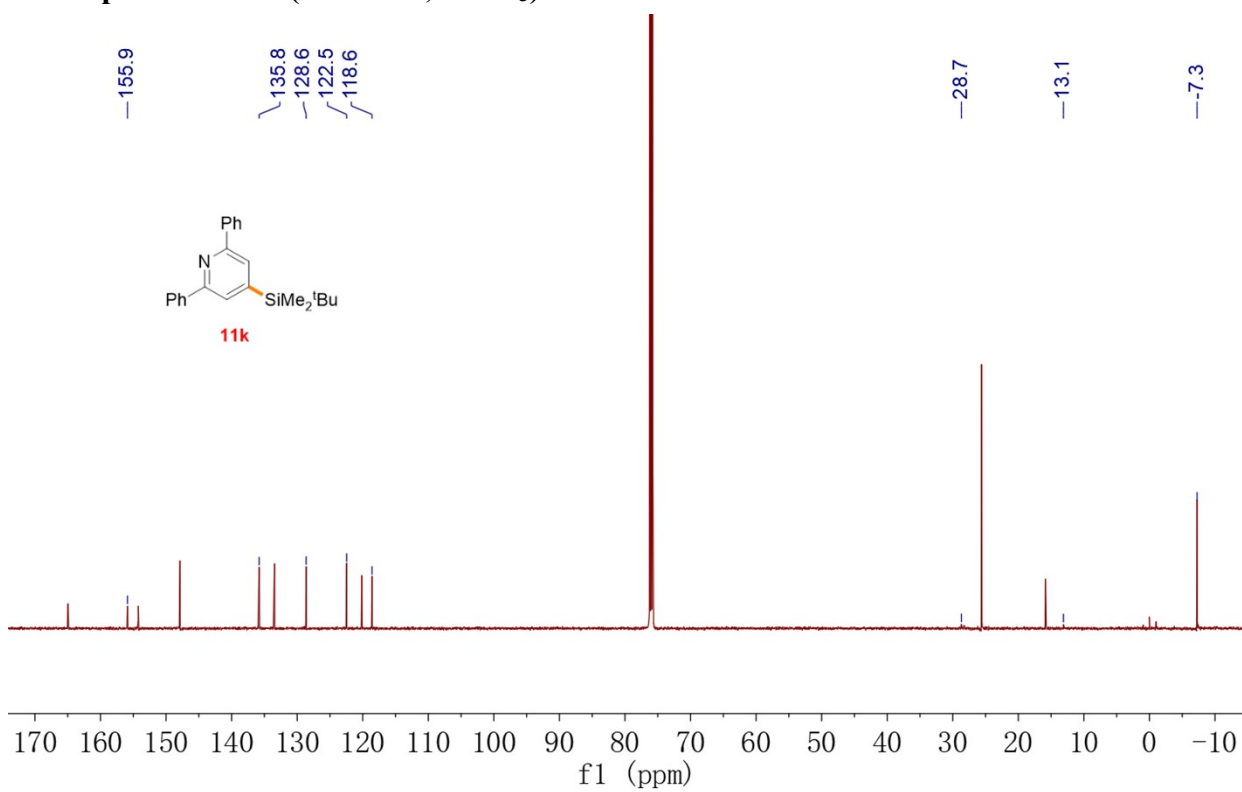

**<sup>1</sup>H NMR spectra of 13a (400 MHz, CDCl<sub>3</sub>)**

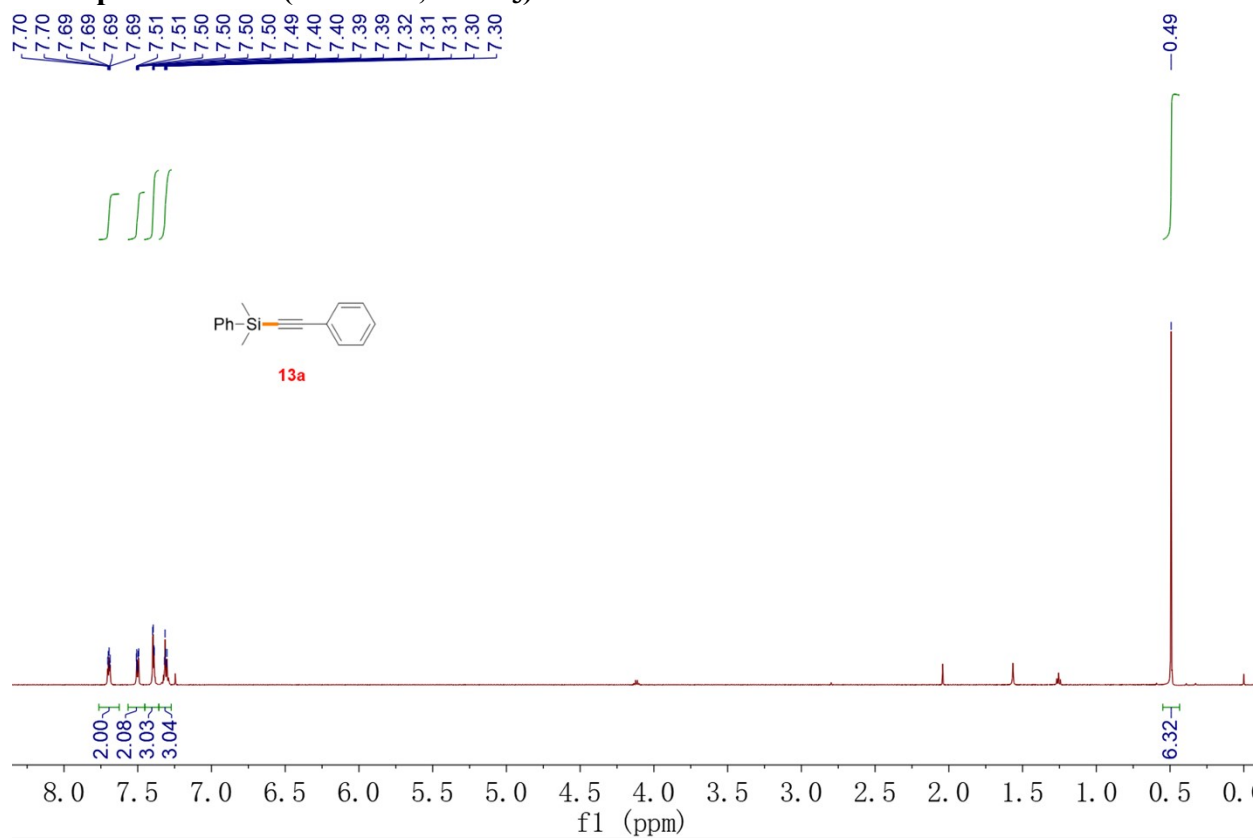

**<sup>13</sup>C NMR spectra of 13a (100 MHz, CDCl<sub>3</sub>)**

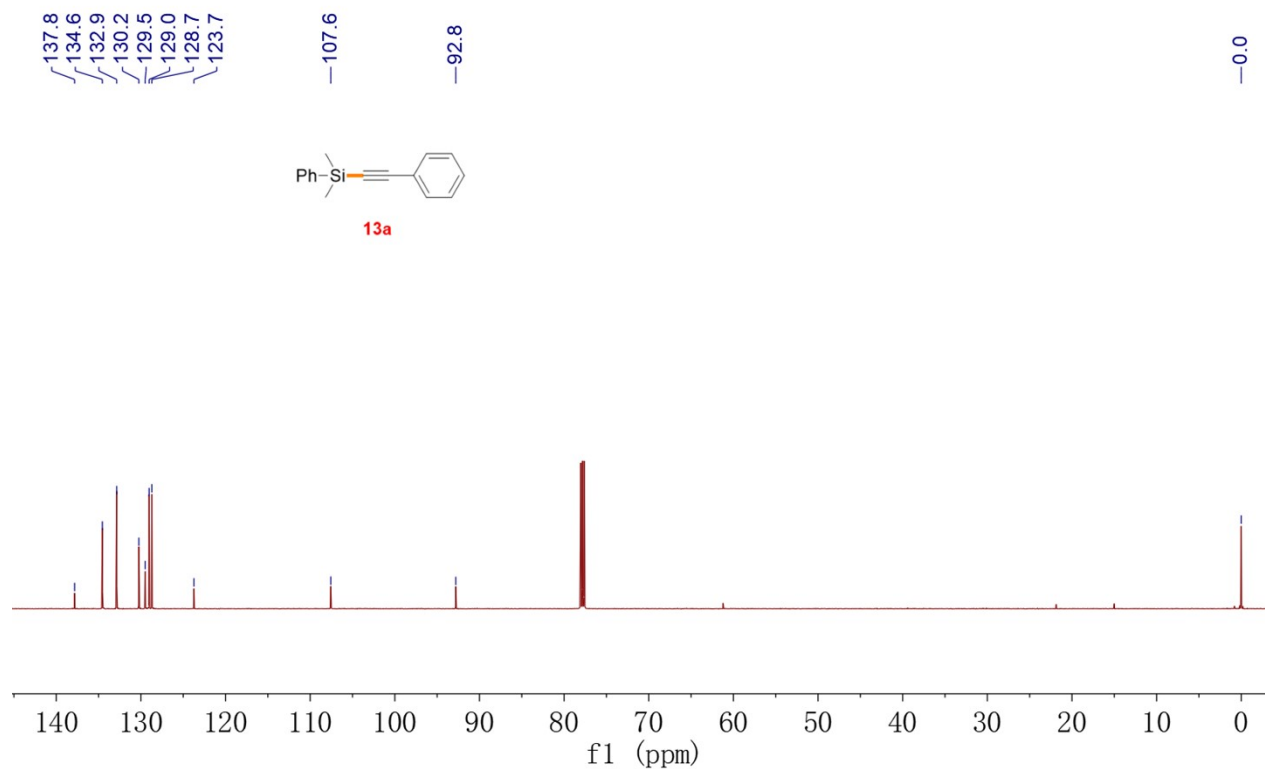

**<sup>1</sup>H NMR spectra of 13b (400 MHz, CDCl<sub>3</sub>)**

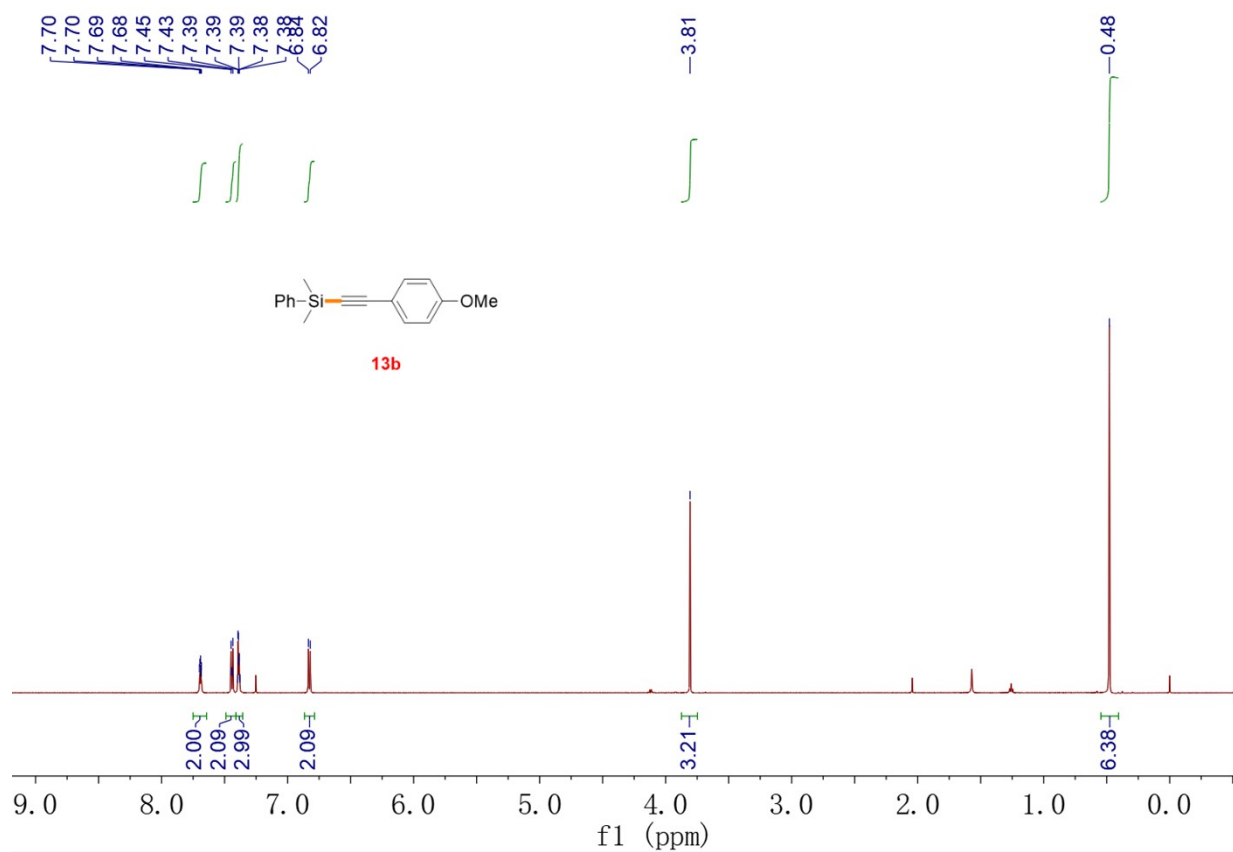

**<sup>13</sup>C NMR spectra of 13b (100 MHz, CDCl<sub>3</sub>)**

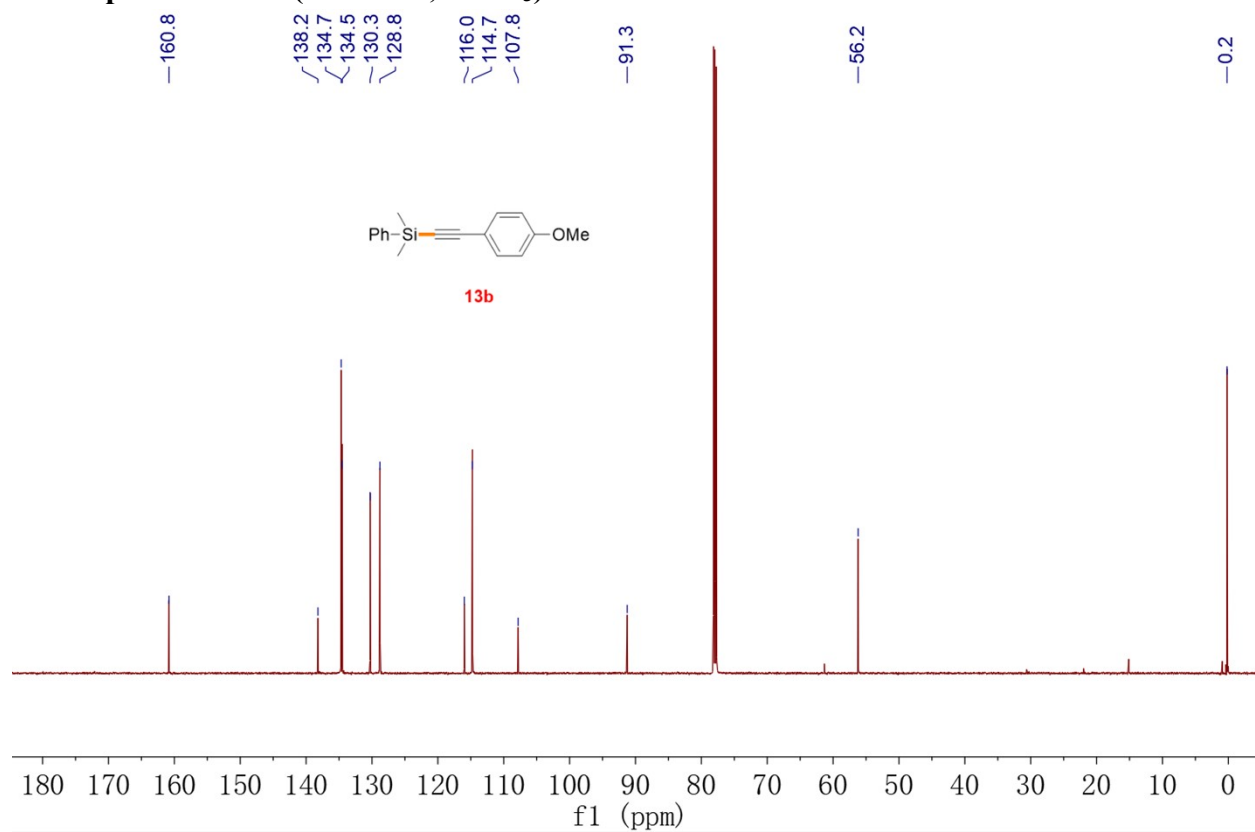

**$^1\text{H}$  NMR spectra of 13c (400 MHz,  $\text{CDCl}_3$ )**

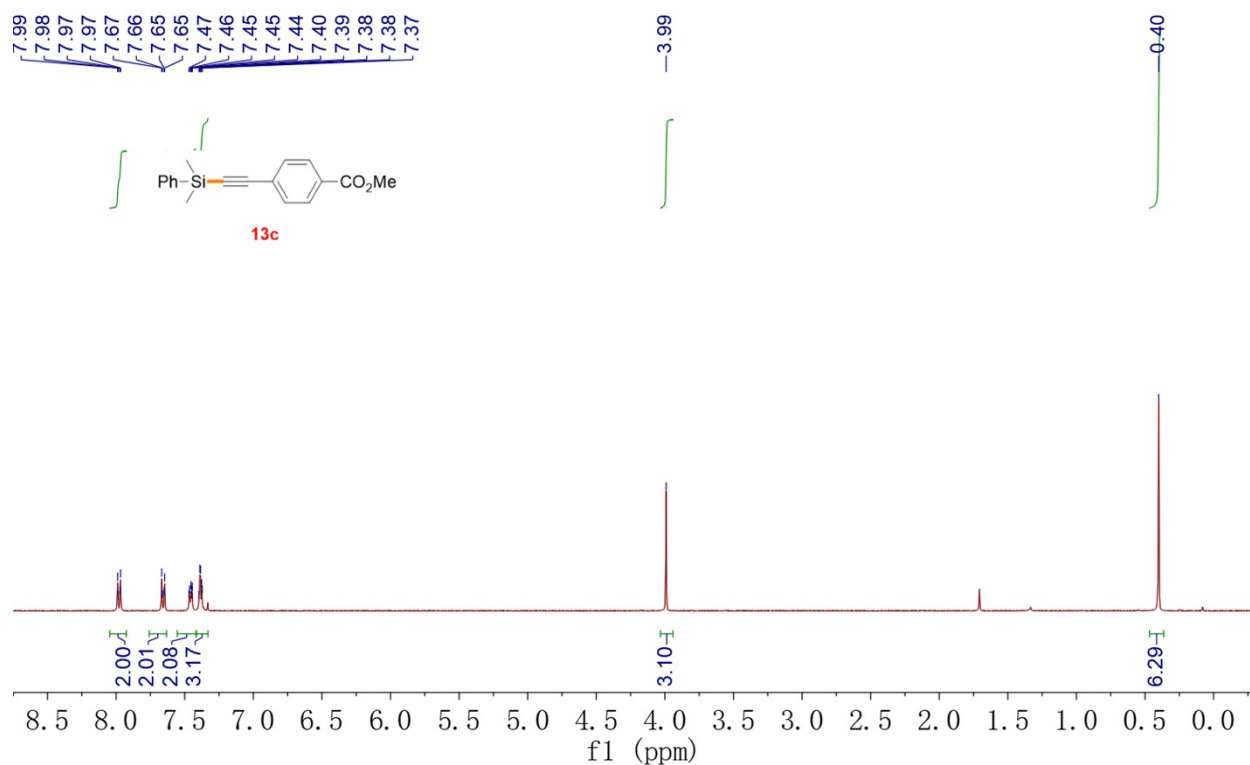

**$^{13}\text{C}$  NMR spectra of 13c (100 MHz,  $\text{CDCl}_3$ )**

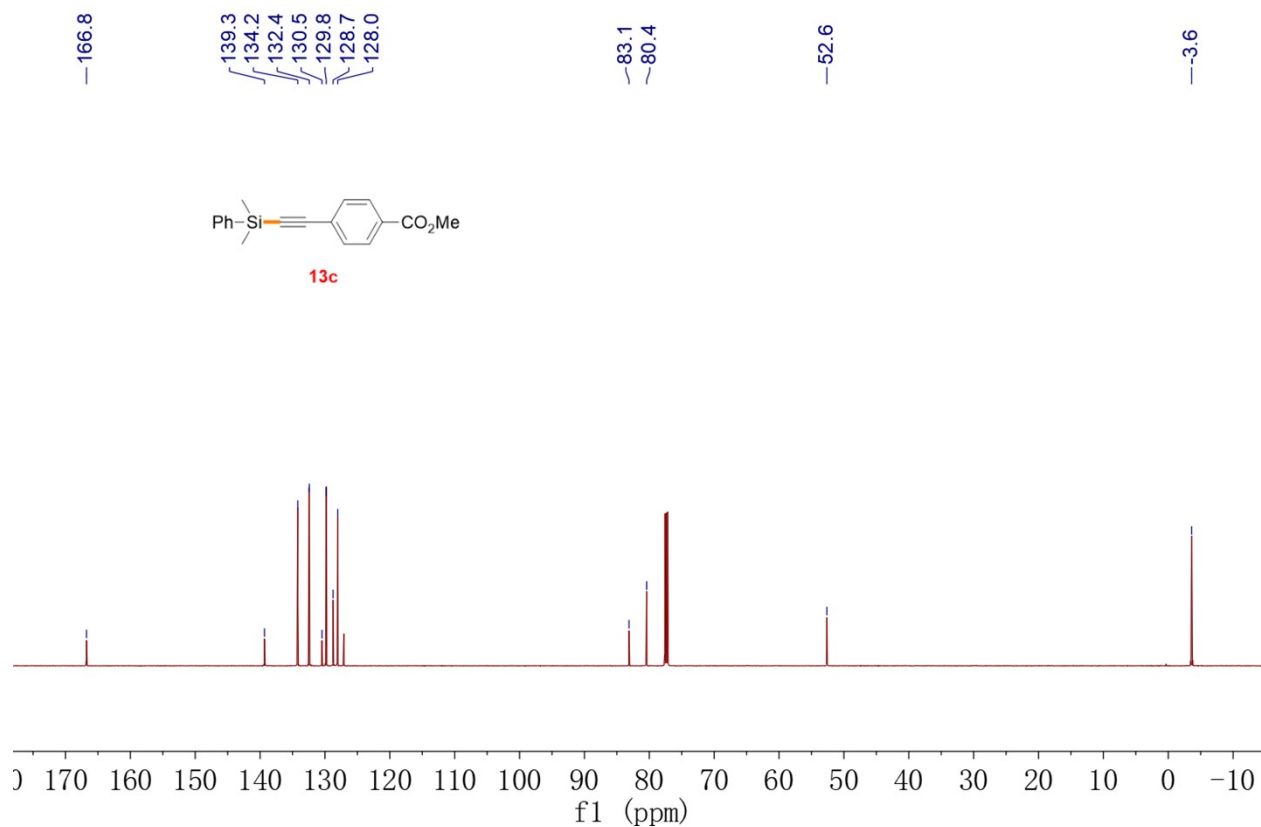

**$^1\text{H}$  NMR spectra of 13d (400 MHz,  $\text{CDCl}_3$ )**

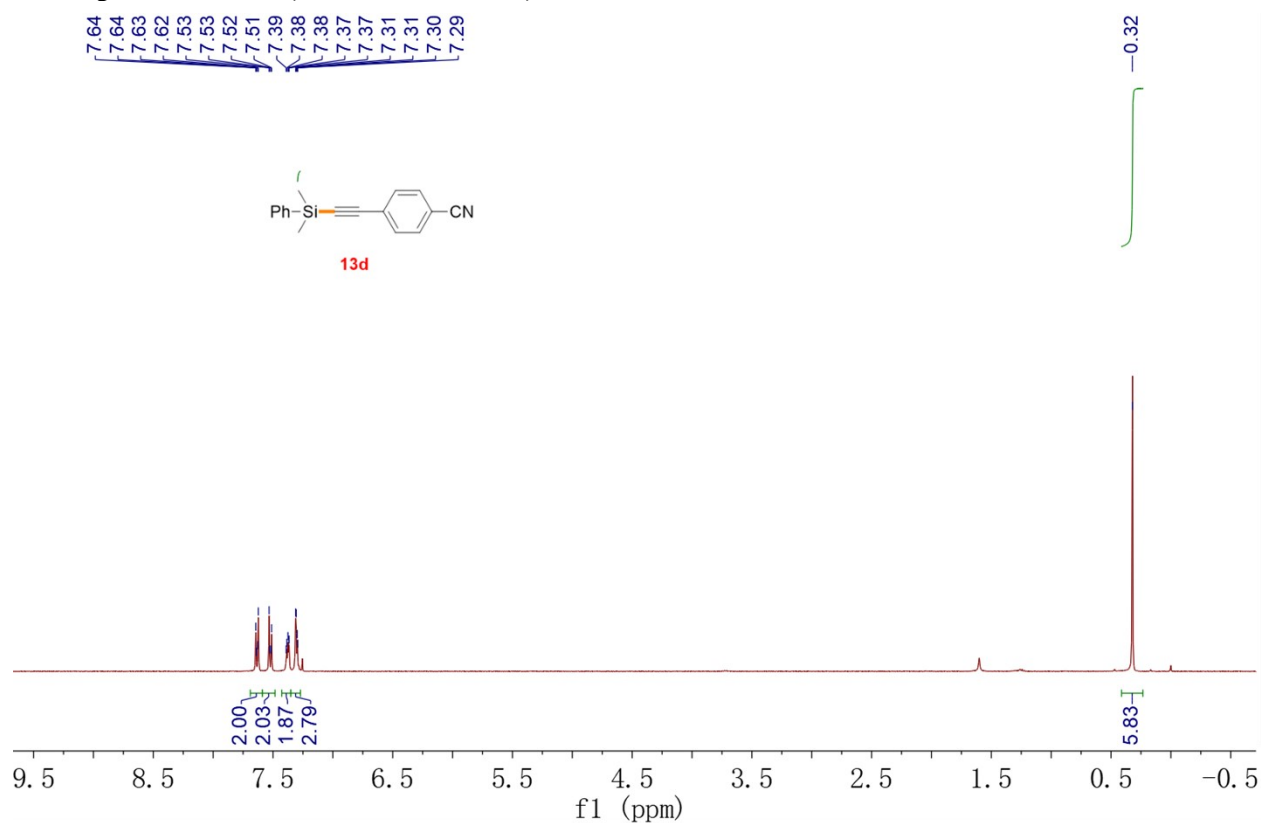

**$^{13}\text{C}$  NMR spectra of 13d (100 MHz,  $\text{CDCl}_3$ )**

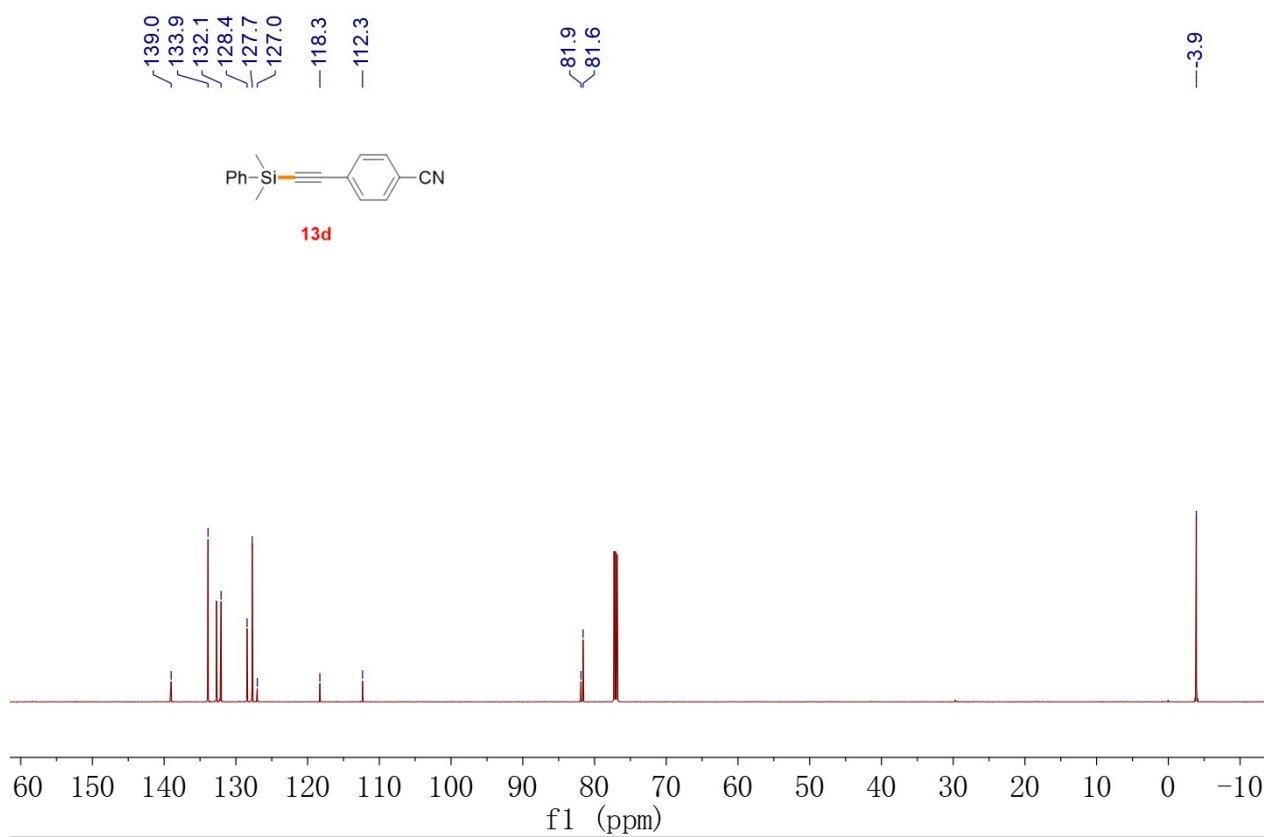

**<sup>1</sup>H NMR spectra of 13e (400 MHz, CDCl<sub>3</sub>)**

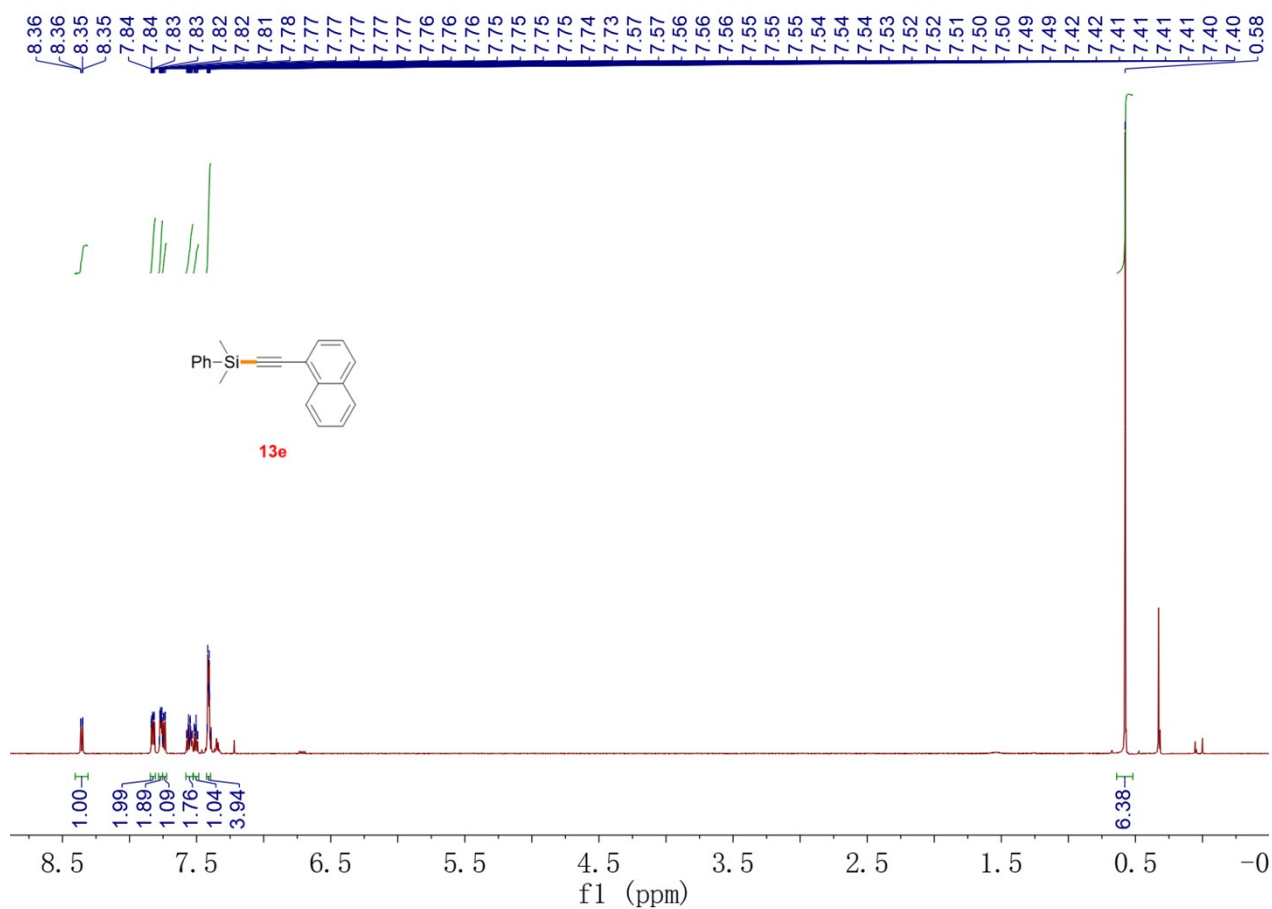

**<sup>13</sup>C NMR spectra of 13e (100 MHz, CDCl<sub>3</sub>)**

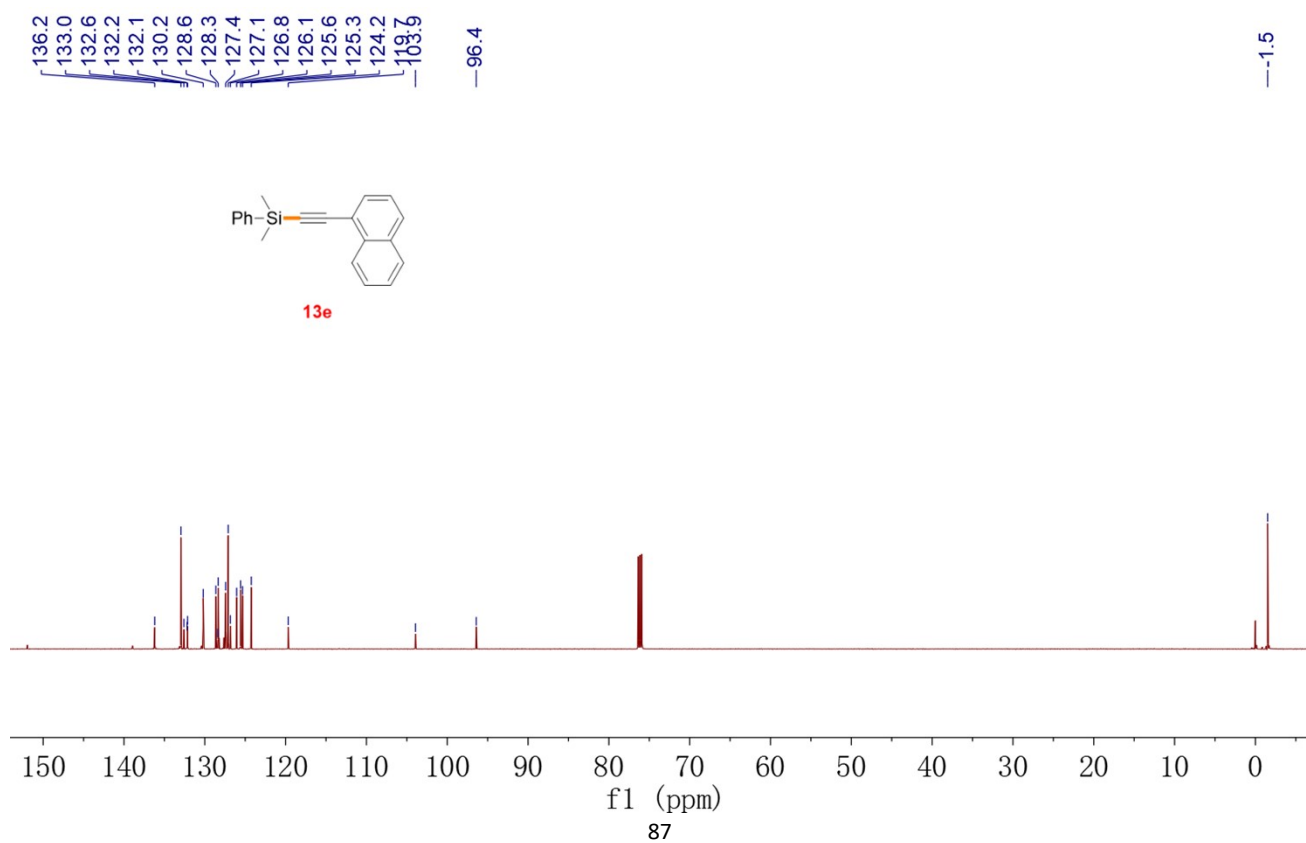

**<sup>1</sup>H NMR spectra of 14a (400 MHz, CDCl<sub>3</sub>)**

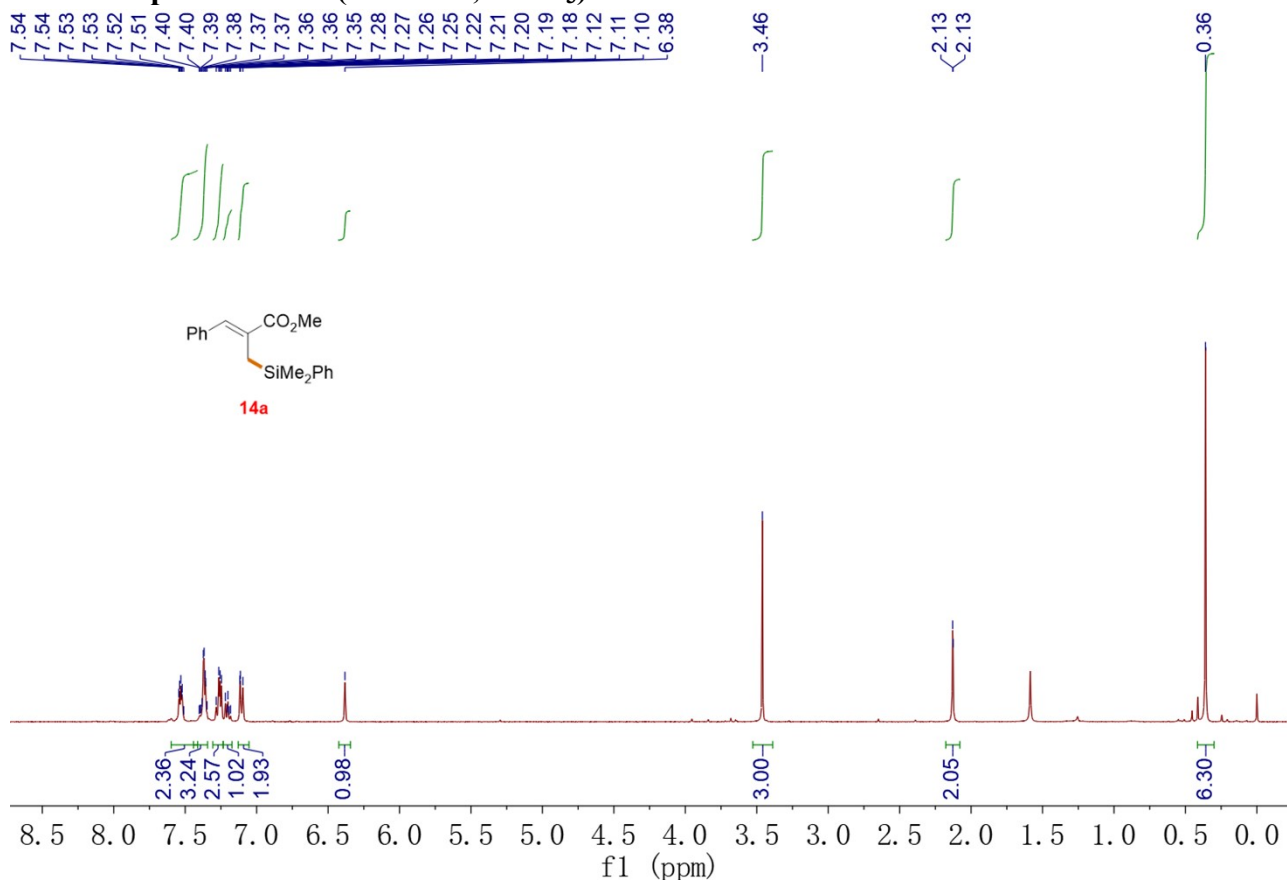

**<sup>13</sup>C NMR spectra of 14a (100 MHz, CDCl<sub>3</sub>)**

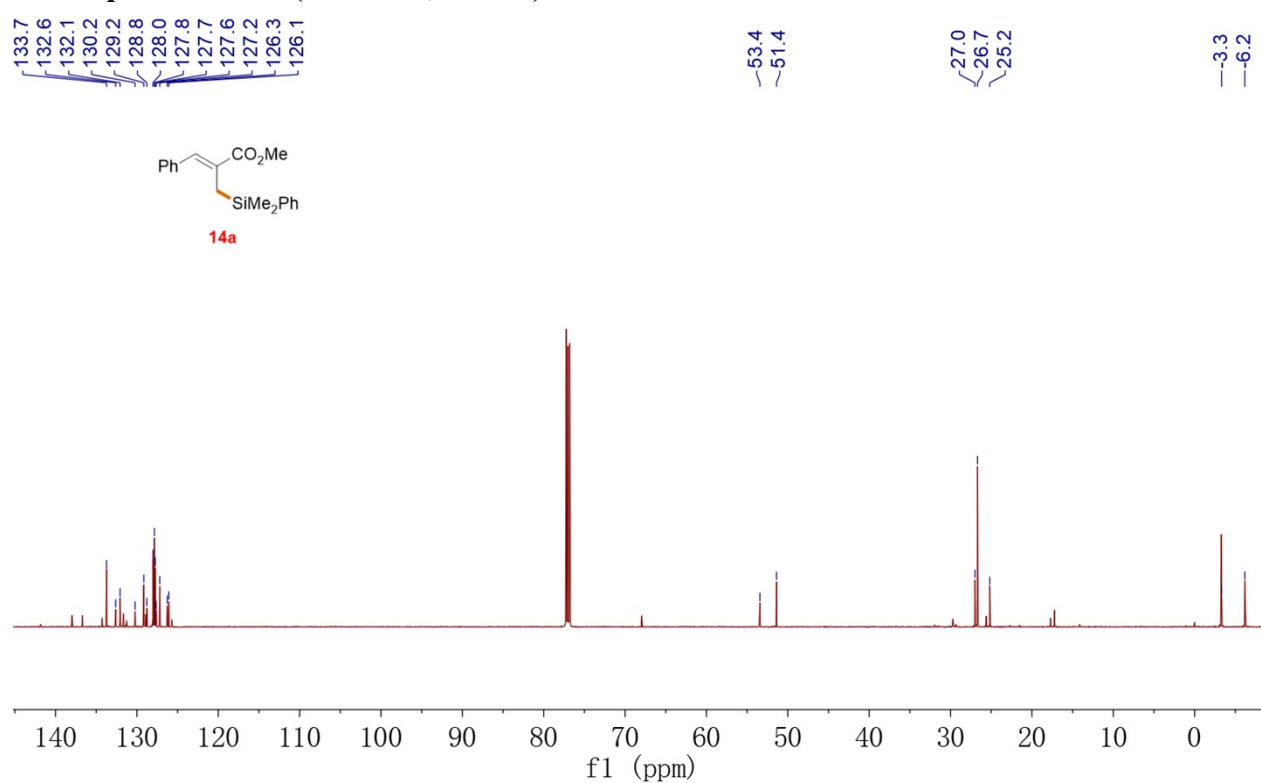

**$^1\text{H}$  NMR spectra of 15a (400 MHz,  $\text{CDCl}_3$ )**

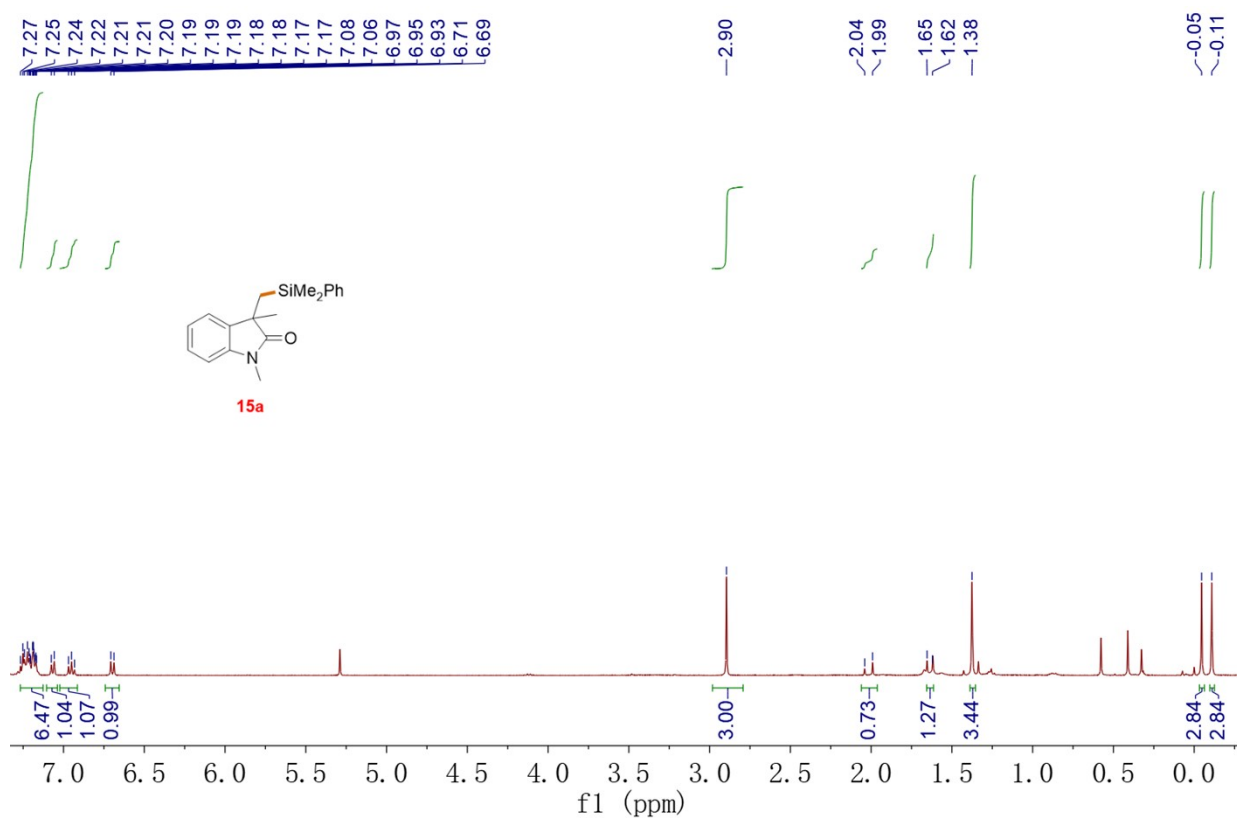

**$^{13}\text{C}$  NMR spectra of 15a (100 MHz,  $\text{CDCl}_3$ )**

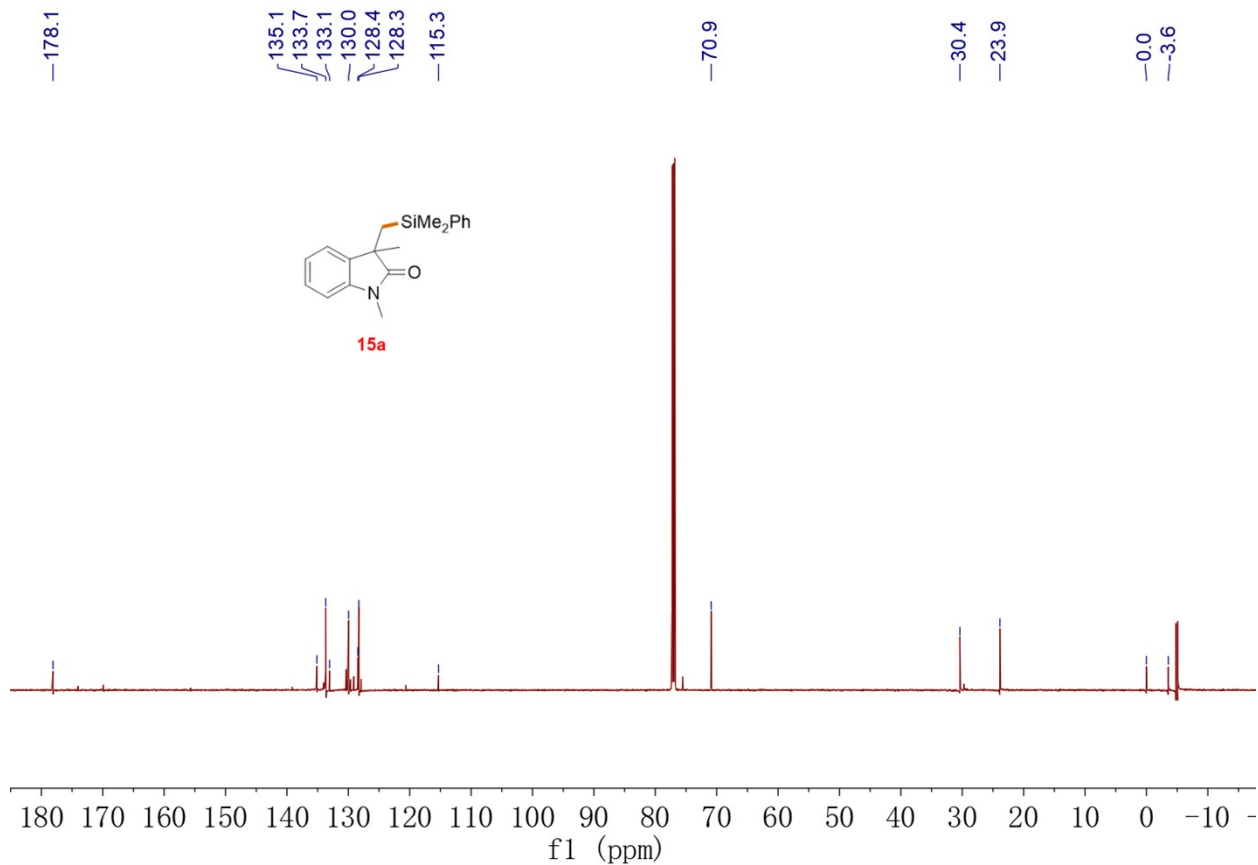

**$^1\text{H}$  NMR spectra of 17a (400 MHz,  $\text{CDCl}_3$ )**

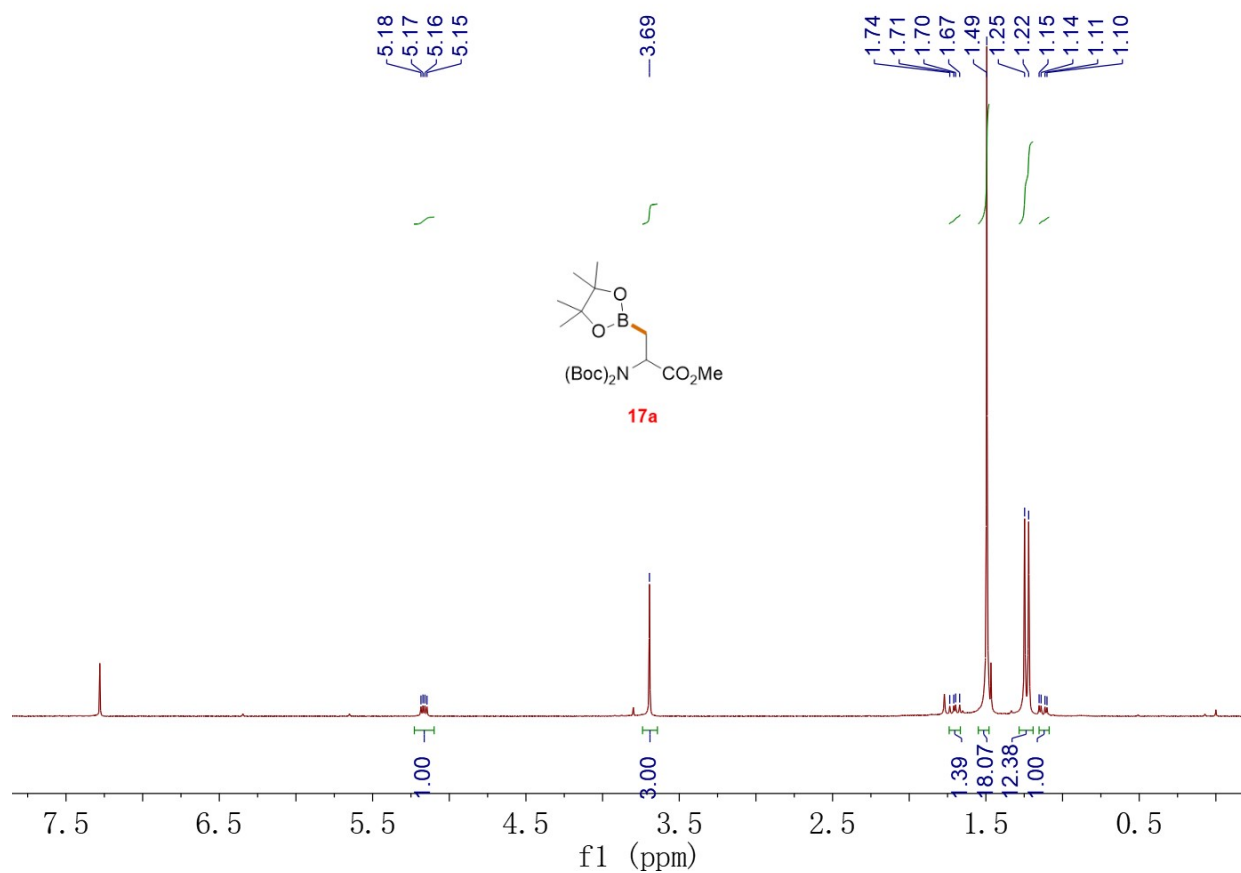

**$^{13}\text{C}$  NMR spectra of 17a (100 MHz,  $\text{CDCl}_3$ )**

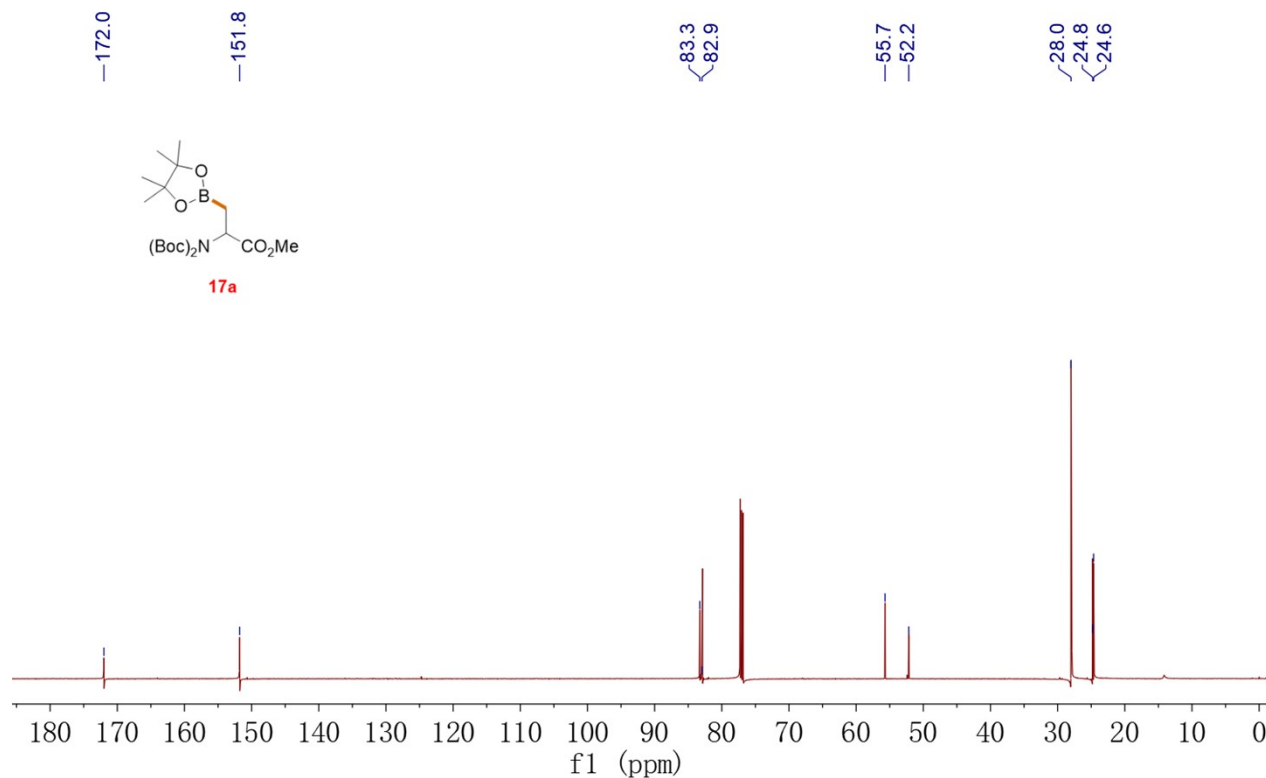

**<sup>1</sup>H NMR spectra of 19a (400 MHz, CDCl<sub>3</sub>)**

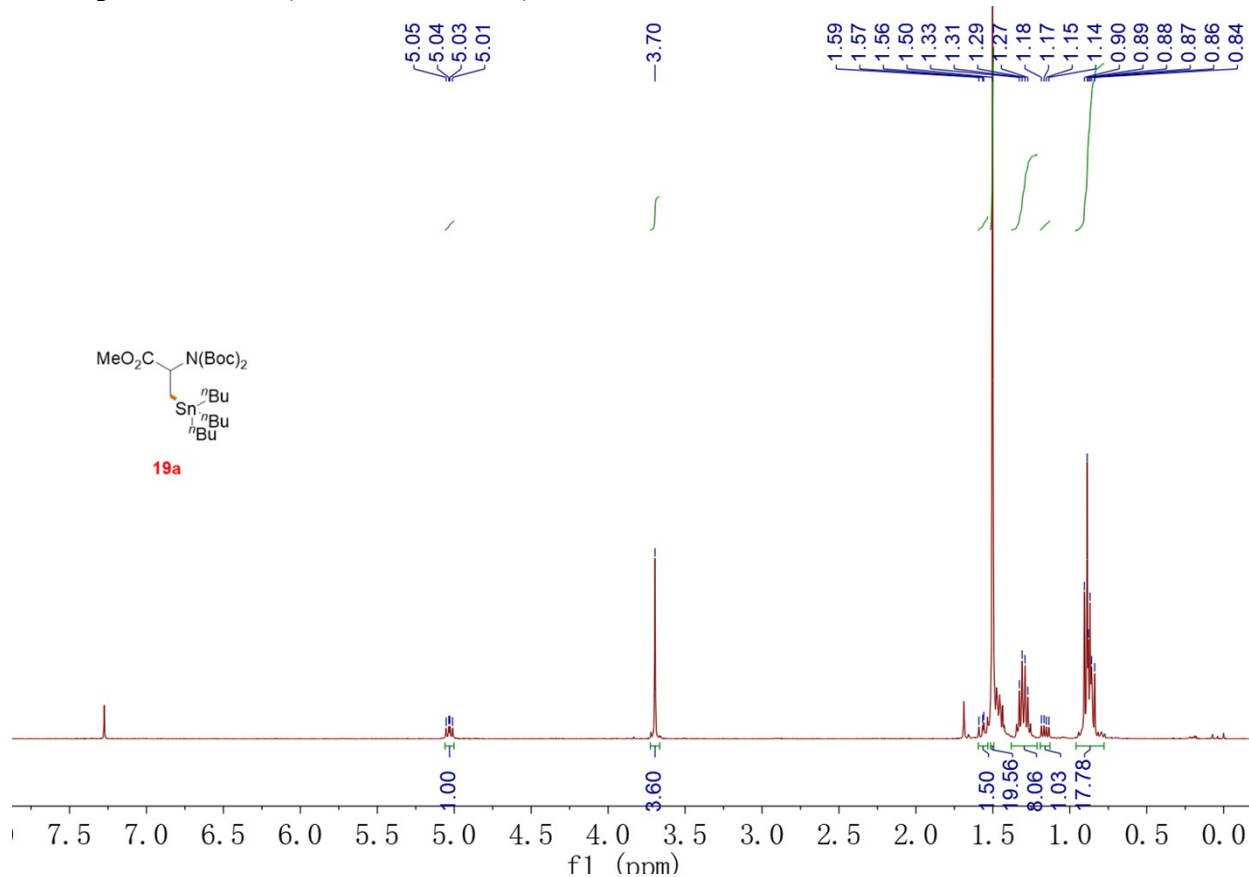

**<sup>13</sup>C NMR spectra of 19a (100 MHz, CDCl<sub>3</sub>)**

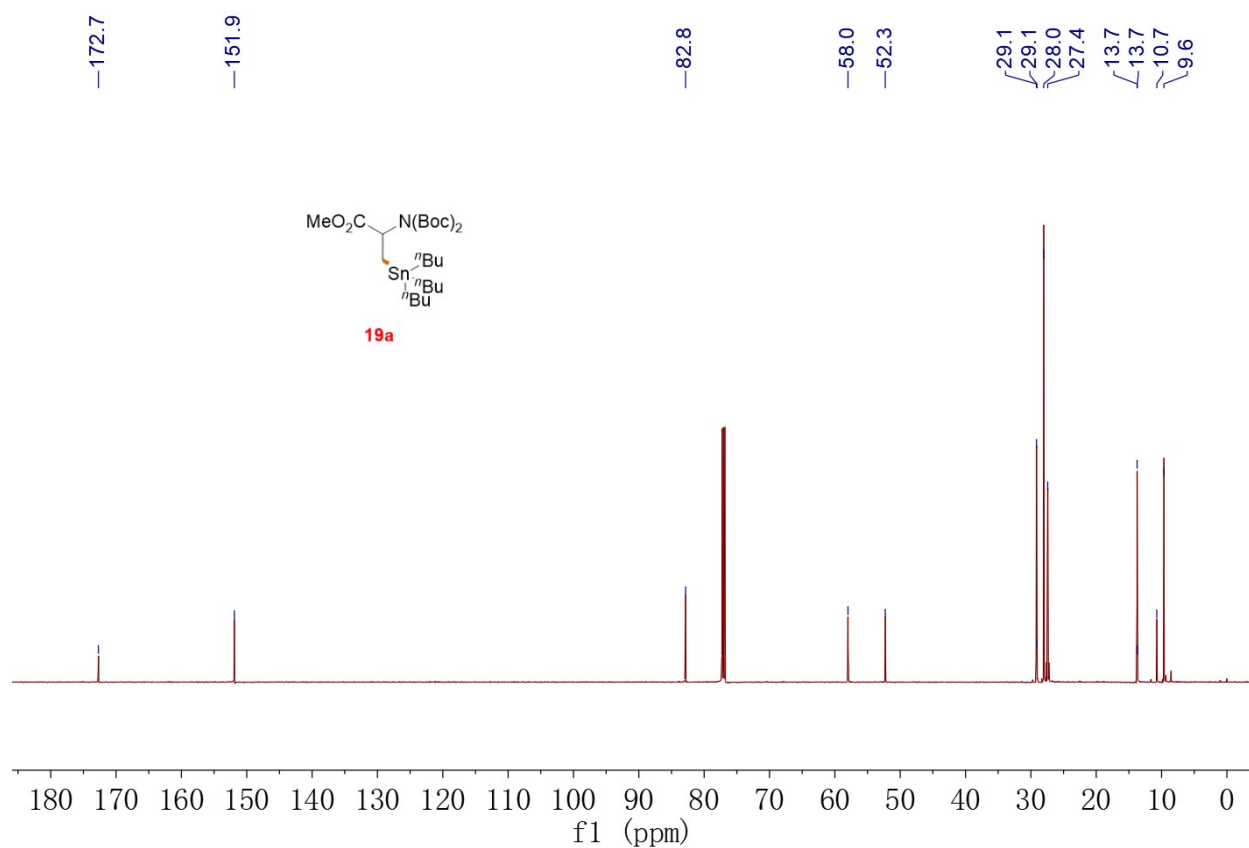

**<sup>1</sup>H NMR spectra of 21a (400 MHz, CDCl<sub>3</sub>)**

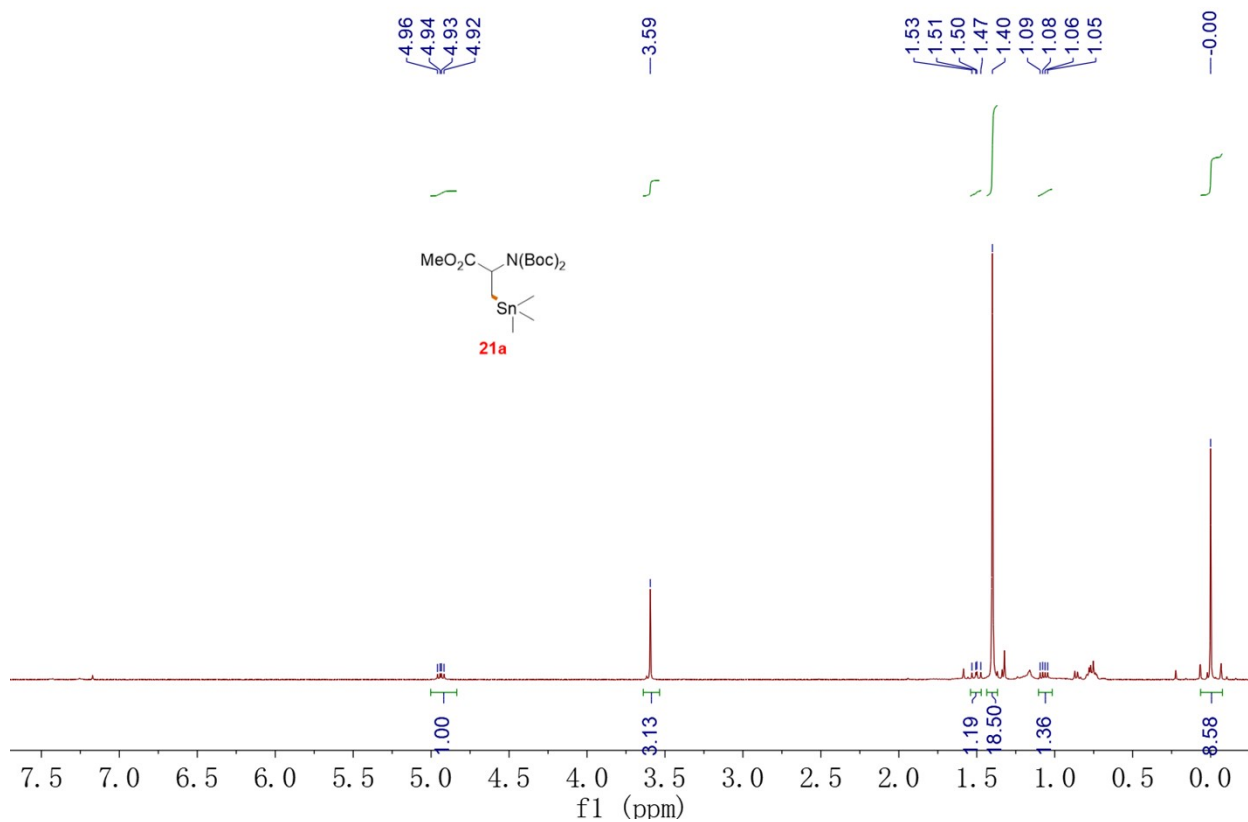

**<sup>13</sup>C NMR spectra of 21a (100 MHz, CDCl<sub>3</sub>)**

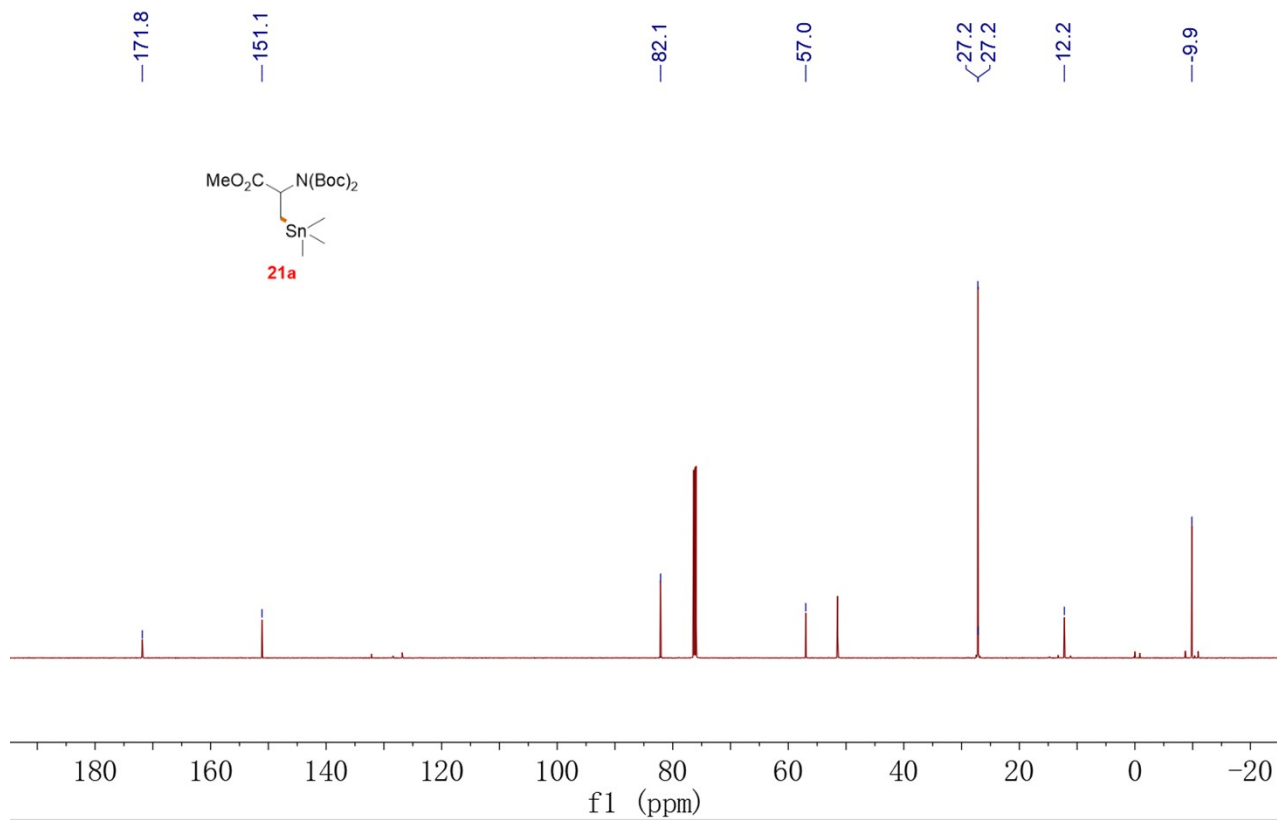

**<sup>1</sup>H NMR spectra of 23a (400 MHz, CDCl<sub>3</sub>)**

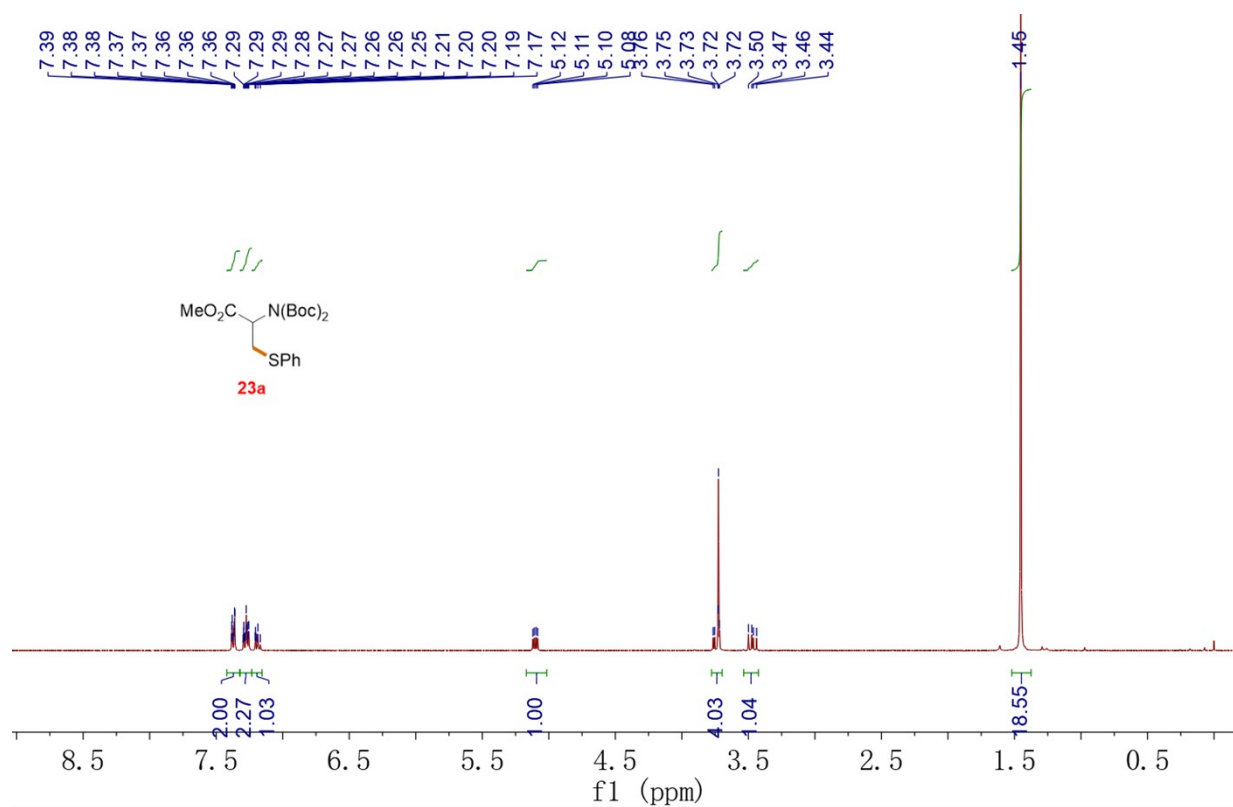

**<sup>13</sup>C NMR spectra of 23a (100 MHz, CDCl<sub>3</sub>)**

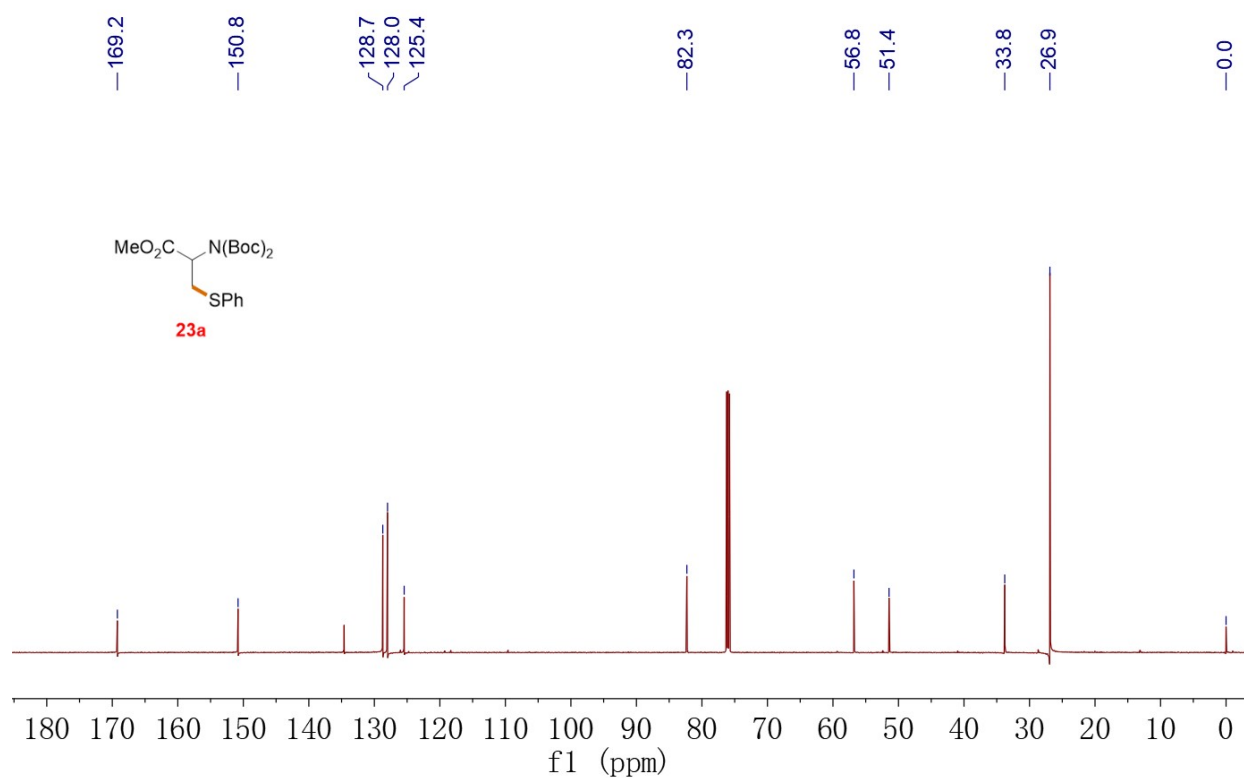

Supplement: d2gc03577d1.pdf [file d2gc03577d1.pdf]
